# Supplementary material for: A Multi-Omics Analysis of NASH-Related Prognostic Biomarkers Associated with Drug Sensitivity and Immune Infiltration in Hepatocellular Carcinoma
Source: MDPI journal article supplement (doi:10.3390/jcm12041286), 2023-02-06
Supplement: s1 [file s1]

| Abbreviation | Full Name                                        |
|--------------|--------------------------------------------------|
| ALR          | augmenter of liver regeneration                  |
| BP           | biological process                               |
| CC           | cellular component                               |
| ceRNA        | competing endogenous RNA                         |
| CNV          | copy number variation                            |
| DEG          | differentially expressed gene                    |
| DLAT         | dihydrolipoamide S-acetyltransferase             |
| GO           | Gene Ontology                                    |
| HCC          | hepatocellular carcinoma                         |
| IDH3B        | isocitrate dehydrogenase 3 $\beta$               |
| IHC          | immunohistochemistry                             |
| KEGG         | Kyoto Encyclopedia of Genes and Genomes          |
| LASSO        | least absolute shrinkage and selection operator  |
| LncRNA       | long non-coding RNA                              |
| MAP3K4       | mitogen-activated protein kinase kinase kinase 4 |
| MF           | molecular function                               |
| mTOR         | mechanistic target of rapamycin                  |
| miRNA        | microRNA                                         |
| NAD          | nicotinamide adenine dinucleotide                |
| NASH         | nonalcoholic steatohepatitis                     |
| OS           | overall survival                                 |
| PPIs         | protein-protein interactions                     |
| ROC          | receiver operating characteristic                |
| sirtuins     | silence information regulator protein family     |
| SNV          | single-nucleotide variant                        |
| TF           | transcription factor                             |
