# Supplementary material for: A Multi-Omics Analysis of NASH-Related Prognostic Biomarkers Associated with Drug Sensitivity and Immune Infiltration in Hepatocellular Carcinoma
Source: J Clin Med. 2023 Feb 6;12(4):1286. doi: 10.3390/jcm12041286 (PMC9963320; doi:10.3390/jcm12041286)
Supplement: Supplementary file 1 [file jcm-12-01286-s001.zip]

Archive with 10 entries (10 files):
- Figure S1.tif
- Figure S2 .tif
- Table S1.xlsx
- Table S2.xlsx
- Table S3.xlsx
- Table S4.xlsx
- Table S5.xlsx
- Table S6.xlsx
- Table S7.xlsx
- Table S8 .pdf
