# Supplementary material for: A Multi-Omics Analysis of NASH-Related Prognostic Biomarkers Associated with Drug Sensitivity and Immune Infiltration in Hepatocellular Carcinoma
Source: J Clin Med. 2023 Feb 6;12(4):1286. doi: 10.3390/jcm12041286 (PMC9963320; doi:10.3390/jcm12041286)
Supplement: Supplementary file 1 [file jcm-12-01286-s001.zip › Table S1.xlsx]

## Sheet: Sheet1
x1	x2	cor
ASPM	ESPL1	0.949
ASPM	CDK2	0.636
ASPM	PTTG1	0.9
ATF3	GADD45B	0.654
ATF3	CCL2	0.478
ATF3	EGR1	0.784
ATF3	ZFP36	0.402
ATF3	CEBPA	0.751
CCL2	PLAT	0.434
CCL2	SERPINE1	0.762
CCL2	CEBPA	0.452
CCL2	EGR1	0.477
CCL2	THBS1	0.569
CDK2	ESPL1	0.645
CDK2	PTTG1	0.559
CDK2	CEBPA	0.999
CEBPA	EGR1	0.499
CEBPA	ATF3	0.751
DLAT	DLD	0.999
DLAT	PDHX	0.991
DLAT	LIAS	0.662
DLD	VTN	0.411
DLD	FPR1	0.457
DLD	LIAS	0.802
DLD	PDHX	0.999
EGR1	GADD45B	0.534
EGR1	SERPINE1	0.503
EGR1	THBS1	0.414
EGR1	ZFP36	0.614
ESPL1	PTTG1	0.999
FPR1	S100A8	0.683
GADD45B	THBS1	0.406
GADD45B	ZFP36	0.619
LIAS	PDHX	0.658
LRP1	PLAT	0.999
LRP1	SERPINE1	0.999
LRP1	VTN	0.439
LRP1	THBS1	0.981
PLAT	THBS1	0.403
PLAT	VTN	0.821
PLAT	SERPINE1	0.999
S100A8	SERPINE1	0.514
