# Supplementary material for: A Multi-Omics Analysis of NASH-Related Prognostic Biomarkers Associated with Drug Sensitivity and Immune Infiltration in Hepatocellular Carcinoma
Source: J Clin Med. 2023 Feb 6;12(4):1286. doi: 10.3390/jcm12041286 (PMC9963320; doi:10.3390/jcm12041286)
Supplement: Supplementary file 1 [file jcm-12-01286-s001.zip › Table S2.xlsx]

## Sheet: DLAT
table
condition	tf	gene	bestmotif	nes
Liver-Tumor	ZNF384	DLAT	dbcorrdb__ZNF384__ENCSR000EFP_1__m2	3.19
Liver-Tumor	ZBTB7A	DLAT	dbcorrdb__IRF1__ENCSR000EGT_1__m1	3.32
Liver-Tumor	UBTF	DLAT	dbcorrdb__GABPA__ENCSR000BGC_1__m1	5.07
Liver-Tumor	THAP1	DLAT	dbcorrdb__THAP1__ENCSR000BNN_1__m2	3.34
Liver-Tumor	TBL1XR1	DLAT	dbcorrdb__POLR3A__ENCSR000DNU_1__m2	3.07
Liver-Tumor	TAF1	DLAT	dbcorrdb__TAF1__ENCSR000BQN_1__m1	3.73
Liver-Tumor	SUPT20H	DLAT	dbcorrdb__GABPA__ENCSR000BLO_1__m1	5.52
Liver-Tumor	SREBF2	DLAT	dbcorrdb__POLR2AphosphoS2__ENCSR000DYF_1__m12	4.42
Liver-Tumor	RELA	DLAT	dbcorrdb__GABPA__ENCSR000BGC_1__m1	5.84
Liver-Tumor	RAD21	DLAT	dbcorrdb__POLR2AphosphoS2__ENCSR000DYF_1__m12	3.45
Liver-Tumor	POLR2A	DLAT	dbcorrdb__POLR2A__ENCSR000BHI_1__m1	4.6
Liver-Tumor	PML	DLAT	dbcorrdb__GABPA__ENCSR000BGC_1__m1	5.61
Liver-Tumor	NR3C1	DLAT	dbcorrdb__CHD2__ENCSR000EED_1__m1	3.02
Liver-Tumor	NFYA	DLAT	transfac_pro__M07302	4.49
Liver-Tumor	NFE2L2	DLAT	taipale_cyt_meth__CREM_NRTGACGTCAYN_eDBD	3.24
Liver-Tumor	MXI1	DLAT	predrem__nrMotif220	3.27
Liver-Tumor	IRF1	DLAT	dbcorrdb__GABPA__ENCSR000BLO_1__m1	5.96
Liver-Tumor	HCFC1	DLAT	dbcorrdb__SIN3A__ENCSR000BLR_1__m2	5.86
Liver-Tumor	GABPB1	DLAT	dbcorrdb__GABPA__ENCSR000BGC_1__m1	5.66
Liver-Tumor	EZH2	DLAT	dbcorrdb__SIN3A__ENCSR000BLR_1__m2	5.49
Liver-Tumor	ETS1	DLAT	dbcorrdb__SIN3A__ENCSR000BLR_1__m2	4.65
Liver-Tumor	ESRRA	DLAT	dbcorrdb__GABPA__ENCSR000BLO_1__m1	5.77
Liver-Tumor	ERF	DLAT	taipale_tf_pairs__ERF_SREBF2_NNCACGTGACMGGAARNN_CAP_repr	3.83
Liver-Tumor	ELK4	DLAT	dbcorrdb__GABPA__ENCSR000BGC_1__m1	3.62
Liver-Tumor	ELK3	DLAT	dbcorrdb__GABPA__ENCSR000BGC_1__m1	4.5
Liver-Tumor	ELF4	DLAT	transfac_pro__M07700	4.9
Liver-Tumor	ELF1	DLAT	cisbp__M4460	5.16
Liver-Tumor	E2F7	DLAT	taipale__E2F7_DBD_TTTTCCCGCCAAAW_repr	6.1
Liver-Tumor	CREM	DLAT	hocomoco__E4F1_HUMAN.H11MO.0.D	3.44
Liver-Tumor	CEBPZ	DLAT	dbcorrdb__POLR2AphosphoS2__ENCSR000DYF_1__m12	3.72
Liver-Tumor	BHLHE40	DLAT	dbcorrdb__GABPA__ENCSR000BGC_1__m1	5.66
Liver-Tumor	BDP1	DLAT	dbcorrdb__POLR3A__ENCSR000DNU_1__m2	3.56

## Sheet: IDH3B
table
condition	tf	gene	bestmotif	nes
Liver-Tumor	TBX21	IDH3B	taipale_tf_pairs__ELK1_TBX21_TNRCACCGGAAGNN_CAP_repr	3.95
Liver-Tumor	TAF7	IDH3B	dbcorrdb__POLR2A__ENCSR000DKT_1__m1	4.18
Liver-Tumor	SUPT20H	IDH3B	dbcorrdb__GABPA__ENCSR000BLO_1__m1	5.52
Liver-Tumor	STAT1	IDH3B	transfac_pro__M00492	3.05
Liver-Tumor	SMARCA4	IDH3B	dbcorrdb__HCFC1__ENCSR000ECH_1__m3	5.44
Liver-Tumor	SIN3A	IDH3B	dbcorrdb__SIN3A__ENCSR000BGL_1__m1	4.98
Liver-Tumor	REST	IDH3B	dbcorrdb__GABPA__ENCSR000BIW_1__m1	6.06
Liver-Tumor	RELA	IDH3B	dbcorrdb__RELA__ENCSR000EAQ_1__m2	3.26
Liver-Tumor	RAD21	IDH3B	dbcorrdb__GABPA__ENCSR000BJK_1__m1	5.89
Liver-Tumor	POLR2A	IDH3B	dbcorrdb__POLR2A__ENCSR000EAU_1__m1	5.59
Liver-Tumor	PML	IDH3B	dbcorrdb__PML__ENCSR000BQM_1__m1	4.08
Liver-Tumor	NR3C1	IDH3B	dbcorrdb__NR3C1__ENCSR000EEV_1__m1	3.39
Liver-Tumor	NR2C2	IDH3B	dbcorrdb__NR2C2__ENCSR000EVS_1__m1	3.43
Liver-Tumor	NELFE	IDH3B	dbcorrdb__ELK4__ENCSR000EVI_1__m1	6.26
Liver-Tumor	MAZ	IDH3B	dbcorrdb__ELK4__ENCSR000EVI_1__m1	5.36
Liver-Tumor	KDM5B	IDH3B	dbcorrdb__GABPA__ENCSR000BJK_1__m1	4.27
Liver-Tumor	KDM5A	IDH3B	dbcorrdb__GABPA__ENCSR000BLO_1__m1	5.67
Liver-Tumor	IRF1	IDH3B	dbcorrdb__GABPA__ENCSR000BLO_1__m1	5.96
Liver-Tumor	IKZF1	IDH3B	cisbp__M2275	3.1
Liver-Tumor	HDAC2	IDH3B	dbcorrdb__ELK4__ENCSR000EVI_1__m1	6.24
Liver-Tumor	GABPB1	IDH3B	swissregulon__hs__ELK1_4_GABP_A_B1_.p3	5.3
Liver-Tumor	GABPA	IDH3B	dbcorrdb__GABPA__ENCSR000BJK_1__m1	6.93
Liver-Tumor	FLI1	IDH3B	transfac_pro__M02038	4.65
Liver-Tumor	EZH2	IDH3B	dbcorrdb__ELK4__ENCSR000EVI_1__m1	5.54
Liver-Tumor	ETV6	IDH3B	transfac_pro__M01993	3.63
Liver-Tumor	ETS1	IDH3B	taipale__ETS1_full_ACCGGAARYN	4.55
Liver-Tumor	ESRRA	IDH3B	dbcorrdb__GABPA__ENCSR000BHS_1__m1	5.74
Liver-Tumor	ELK3	IDH3B	cisbp__M5384	4.38
Liver-Tumor	ELF4	IDH3B	transfac_pro__M07700	4.9
Liver-Tumor	ELF1	IDH3B	factorbook__ELF1	6.06
Liver-Tumor	CTCF	IDH3B	dbcorrdb__ELK4__ENCSR000EVI_1__m1	4.71
Liver-Tumor	CREB1	IDH3B	dbcorrdb__ELK1__ENCSR000ECI_1__m1	5.22
Liver-Tumor	BHLHE40	IDH3B	dbcorrdb__GABPA__ENCSR000BGC_1__m1	5.66
Liver-Tumor	BCLAF1	IDH3B	transfac_pro__M04704	5.6
Liver-Tumor	ARNTL	IDH3B	dbcorrdb__ATF3__ENCSR000DOG_1__m1	3.15

## Sheet: MAP3K4
table
condition	tf	gene	bestmotif	nes
Liver-Tumor	ZMIZ1	MAP3K4	dbcorrdb__POLR2A__ENCSR000EAR_1__m1	3.17
Liver-Tumor	YY1	MAP3K4	cisbp__M5154	3.99
Liver-Tumor	SUPT20H	MAP3K4	dbcorrdb__POLR2A__ENCSR000BHH_1__m1	4.11
Liver-Tumor	SMARCA4	MAP3K4	dbcorrdb__POLR2A__ENCSR000BHH_1__m1	4.8
Liver-Tumor	REST	MAP3K4	dbcorrdb__YY1__ENCSR000EWF_1__m1	3.93
Liver-Tumor	NR1D1	MAP3K4	transfac_pro__M07955	3.87
Liver-Tumor	NFYA	MAP3K4	dbcorrdb__SP1__ENCSR000BIR_1__m1	4.44
Liver-Tumor	MXI1	MAP3K4	predrem__nrMotif2090	3.38
Liver-Tumor	ELK4	MAP3K4	transfac_pro__M09262	4.04
Liver-Tumor	ELK1	MAP3K4	homer__AACCGGAAGT_ETS	3.86
Liver-Tumor	ELF2	MAP3K4	homer__AACCGGAAGT_ETS	4.29
Liver-Tumor	CTCF	MAP3K4	dbcorrdb__POLR2A__ENCSR000BHH_1__m1	4.16
Liver-Tumor	BHLHE40	MAP3K4	dbcorrdb__POLR2A__ENCSR000BHH_1__m1	4.37
