# Supplementary material for: A Multi-Omics Analysis of NASH-Related Prognostic Biomarkers Associated with Drug Sensitivity and Immune Infiltration in Hepatocellular Carcinoma
Source: J Clin Med. 2023 Feb 6;12(4):1286. doi: 10.3390/jcm12041286 (PMC9963320; doi:10.3390/jcm12041286)
Supplement: Supplementary file 1 [file jcm-12-01286-s001.zip › Table S3.xlsx]

## Sheet: mirDIP_DLAT
Generated at: 2022/11/17 03:37:17
mirDIP version: 5.2.8.1.
Database version: 5.2.3.1
Gene Symbol - DLAT
Micro RNA -
Minimum Score - Very High
Results (37)
Gene Symbol	Uniprot	Pseudogene	MicroRNA	Integrated Score	Number of Sources	Score Class	Sources
DLAT	P10515		hsa-miR-365a-3p	0.843029	12	Very High	BCmicrO|CoMeTa|DIANA|MirAncesTar|mirbase|miRcode|miRDB_v6|MiRNATIP|miRTar2GO|MirTar2|mirzag|TargetScan_v7_2
DLAT	P10515		hsa-miR-96-5p	0.835449	15	Very High	BCmicrO|CoMeTa|Cupid|MirAncesTar|miranda_May_2021|mirbase|miRcode|miRDB_v6|MiRNATIP|miRTar2GO|MirTar2|mirzag|MultiMiTar|PACCMIT|TargetScan_v7_2
DLAT	P10515		hsa-miR-1271-5p	0.762387	11	Very High	CoMeTa|Cupid|MirAncesTar|miranda_May_2021|miRcode|miRDB_v6|MiRNATIP|MirTar2|mirzag|PACCMIT|TargetScan_v7_2
DLAT	P10515		hsa-miR-513a-3p	0.739067	12	Very High	BCmicrO|bitargeting_May_2021|CoMeTa|DIANA|MBStar|MirAncesTar|miranda_May_2021|miRDB_v6|MiRNATIP|MirTar2|mirzag|PACCMIT
DLAT	P10515		hsa-miR-365b-3p	0.69814	8	Very High	DIANA|MirAncesTar|miranda_May_2021|miRDB_v6|MiRNATIP|MirTar2|mirzag|TargetScan_v7_2
DLAT	P10515		hsa-miR-376b-3p	0.687378	11	Very High	BCmicrO|CoMeTa|MBStar|MirAncesTar|miranda_May_2021|mirbase|miRDB_v6|MiRNATIP|MirTar2|mirzag|TargetScan_v7_2
DLAT	P10515		hsa-miR-376a-3p	0.68704	9	Very High	BCmicrO|CoMeTa|MBStar|MirAncesTar|miRDB_v6|MiRNATIP|MirTar2|mirzag|TargetScan_v7_2
DLAT	P10515		hsa-miR-582-3p	0.68364	14	Very High	BCmicrO|bitargeting_May_2021|CoMeTa|DIANA|MBStar|MirAncesTar|miranda_May_2021|mirbase|miRDB_v6|MiRNATIP|MirSNPInTarget|MirTar2|mirzag|PITA_May_2021
DLAT	P10515		hsa-miR-122-5p	0.652187	12	Very High	bitargeting_May_2021|MirAncesTar|miranda_May_2021|miRcode|mirCoX|miRDB_v6|MiRNATIP|miRTar2GO|mirzag|PACCMIT|RNA22|TargetScan_v7_2
DLAT	P10515		hsa-miR-4775	0.648438	10	Very High	DIANA|MBStar|MirAncesTar|miranda_May_2021|miRDB_v6|MiRNATIP|MirSNPInTarget|MirTar2|mirzag|PACCMIT
DLAT	P10515		hsa-miR-513c-3p	0.618917	9	Very High	DIANA|MBStar|MirAncesTar|miranda_May_2021|miRDB_v6|MiRNATIP|MirTar2|mirzag|PACCMIT
DLAT	P10515		hsa-miR-562	0.591394	10	Very High	BCmicrO|CoMeTa|MBStar|MirAncesTar|miranda_May_2021|MiRNATIP|miRTar2GO|MirTar2|mirzag|RNA22
DLAT	P10515		hsa-miR-548b-3p	0.584479	11	Very High	BCmicrO|CoMeTa|DIANA|MirAncesTar|miranda_May_2021|miRDB_v6|mirmap_May_2021|MiRNATIP|MirTar2|mirzag|PACCMIT
DLAT	P10515		hsa-miR-610	0.56784	12	Very High	BCmicrO|bitargeting_May_2021|CoMeTa|DIANA|MBStar|MirAncesTar|miranda_May_2021|mirmap_May_2021|MiRNATIP|mirzag|MultiMiTar|PITA_May_2021
DLAT	P10515		hsa-miR-1281	0.487618	9	Very High	BCmicrO|bitargeting_May_2021|CoMeTa|MirAncesTar|miRDB_v6|MiRNATIP|MirSNPInTarget|MirTar2|mirzag
DLAT	P10515		hsa-miR-10b-3p	0.45816	8	Very High	bitargeting_May_2021|MBStar|MirAncesTar|miranda_May_2021|miRDB_v6|MiRNATIP|MirTar2|mirzag
DLAT	P10515		hsa-miR-487b-3p	0.457166	8	Very High	BCmicrO|CoMeTa|MBStar|MirAncesTar|miRDB_v6|MiRNATIP|MirTar2|mirzag
DLAT	P10515		hsa-miR-3606-3p	0.431675	6	Very High	MBStar|MirAncesTar|miranda_May_2021|miRDB_v6|MiRNATIP|mirzag
DLAT	P10515		hsa-miR-664b-5p	0.426451	11	Very High	bitargeting_May_2021|DIANA|MirAncesTar|miranda_May_2021|miRDB_v6|MiRNATIP|MirSNPInTarget|MirTar2|mirzag|PITA_May_2021|RNA22
DLAT	P10515		hsa-miR-631	0.415378	10	Very High	BCmicrO|CoMeTa|DIANA|MBStar|MirAncesTar|miranda_May_2021|miRDB_v6|MiRNATIP|MirTar2|RNA22
DLAT	P10515		hsa-miR-3911	0.410573	11	Very High	bitargeting_May_2021|MBStar|MirAncesTar|miranda_May_2021|miRDB_v6|MiRNATIP|MirSNPInTarget|MirTar2|mirzag|PITA_May_2021|RNA22
DLAT	P10515		hsa-miR-4714-3p	0.38344	7	Very High	DIANA|MBStar|MirAncesTar|miranda_May_2021|miRDB_v6|MirTar2|mirzag
DLAT	P10515		hsa-miR-6833-3p	0.38236	5	Very High	MirAncesTar|miranda_May_2021|miRDB_v6|MiRNATIP|mirzag
DLAT	P10515		hsa-miR-5694	0.372915	8	Very High	MBStar|MirAncesTar|miRDB_v6|MiRNATIP|MirSNPInTarget|MirTar2|mirzag|PACCMIT
DLAT	P10515		hsa-miR-384	0.369938	7	Very High	CoMeTa|MBStar|MirAncesTar|miRDB_v6|MiRNATIP|MirTar2|mirzag
DLAT	P10515		hsa-miR-8065	0.326982	9	Very High	bitargeting_May_2021|MirAncesTar|miranda_May_2021|miRDB_v6|mirmap_May_2021|MiRNATIP|mirzag|PITA_May_2021|RNA22
DLAT	P10515		hsa-miR-6734-3p	0.323831	7	Very High	bitargeting_May_2021|MirAncesTar|miranda_May_2021|miRDB_v6|MiRNATIP|mirzag|PITA_May_2021
DLAT	P10515		hsa-miR-1249-3p	0.316842	8	Very High	BCmicrO|bitargeting_May_2021|CoMeTa|MBStar|MirAncesTar|miranda_May_2021|MiRNATIP|rnahybrid_May_2021
DLAT	P10515		hsa-miR-6772-5p	0.301873	8	Very High	bitargeting_May_2021|MirAncesTar|miranda_May_2021|miRDB_v6|MiRNATIP|mirzag|PITA_May_2021|RNA22
DLAT	P10515		hsa-miR-4641	0.297942	5	Very High	DIANA|MirAncesTar|miranda_May_2021|miRDB_v6|mirzag
DLAT	P10515		hsa-miR-6513-5p	0.291665	7	Very High	bitargeting_May_2021|MBStar|MirAncesTar|miranda_May_2021|miRDB_v6|MiRNATIP|mirzag
DLAT	P10515		hsa-miR-6750-5p	0.290965	7	Very High	bitargeting_May_2021|MirAncesTar|miranda_May_2021|miRDB_v6|mirmap_May_2021|mirzag|PITA_May_2021
DLAT	P10515		hsa-miR-517c-3p	0.286757	6	Very High	BCmicrO|bitargeting_May_2021|CoMeTa|MirAncesTar|miranda_May_2021|mirbase
DLAT	P10515		hsa-miR-6128	0.272882	6	Very High	MBStar|MirAncesTar|miranda_May_2021|miRDB_v6|MiRNATIP|mirzag
DLAT	P10515		hsa-miR-6822-5p	0.226144	5	Very High	MirAncesTar|miRDB_v6|mirmap_May_2021|mirzag|RNA22
DLAT	P10515		hsa-miR-6500-3p	0.225942	7	Very High	bitargeting_May_2021|MBStar|MirAncesTar|miranda_May_2021|MiRNATIP|mirzag|RNA22
DLAT	P10515		hsa-miR-6872-5p	0.0910759	4	Very High	bitargeting_May_2021|MirAncesTar|MiRNATIP|PITA_May_2021

## Sheet: mirDIP_IDH3B
Generated at: 2022/11/17 04:31:05
mirDIP version: 5.2.8.1.
Database version: 5.2.3.1
Gene Symbol - IDH3B
Micro RNA -
Minimum Score - Medium
Results (346)
Gene Symbol	Uniprot	Pseudogene	MicroRNA	Integrated Score	Number of Sources	Score Class	Sources
IDH3B	O43837		hsa-miR-562	0.428175	9	High	BCmicrO|bitargeting_May_2021|CoMeTa|MirAncesTar|miranda_May_2021|mirbase|MirSNPInTarget|mirzag|MultiMiTar
IDH3B	O43837		hsa-miR-1275	0.422813	12	High	BCmicrO|bitargeting_May_2021|CoMeTa|DIANA|MBStar|MirAncesTar|mirCoX|MiRNATIP|mirzag|PITA_May_2021|RNA22|rnahybrid_May_2021
IDH3B	O43837		hsa-miR-212-3p	0.390234	10	Medium	BCmicrO|bitargeting_May_2021|DIANA|MirAncesTar|mirbase|miRcode|mirCoX|MiRNATIP|mirzag|PITA_May_2021
IDH3B	O43837		hsa-miR-649	0.371843	7	High	BCmicrO|CoMeTa|MirAncesTar|mirbase|MiRNATIP|mirzag|PACCMIT
IDH3B	O43837		hsa-miR-5698	0.328519	10	High	bitargeting_May_2021|DIANA|MirAncesTar|miranda_May_2021|mirmap_May_2021|MiRNATIP|MirTar2|mirzag|PITA_May_2021|RNA22
IDH3B	O43837		hsa-miR-31-5p	0.315353	9	Medium	BCmicrO|MirAncesTar|miRcode|mirmap_May_2021|MiRNATIP|mirzag|MultiMiTar|PITA_May_2021|RNA22
IDH3B	O43837		hsa-miR-150-3p	0.309178	10	High	bitargeting_May_2021|MBStar|MirAncesTar|miranda_May_2021|mirbase|MiRNATIP|MirSNPInTarget|mirzag|PITA_May_2021|RNA22
IDH3B	O43837		hsa-miR-645	0.30893	8	High	BCmicrO|bitargeting_May_2021|DIANA|MirAncesTar|mirbase|MiRNATIP|mirzag|MultiMiTar
IDH3B	O43837		hsa-miR-940	0.308417	7	Medium	BCmicrO|MirAncesTar|miranda_May_2021|miRDB_v6|mirmap_May_2021|MiRNATIP|MultiMiTar
IDH3B	O43837		hsa-miR-661	0.308228	9	Medium	BCmicrO|bitargeting_May_2021|DIANA|MirAncesTar|miranda_May_2021|mirbase|MiRNATIP|mirzag|PITA_May_2021
IDH3B	O43837		hsa-miR-197-3p	0.308102	9	Medium	BCmicrO|bitargeting_May_2021|MirAncesTar|miranda_May_2021|mirbase|mirCoX|MiRNATIP|mirzag|PITA_May_2021
IDH3B	O43837		hsa-miR-107	0.3066	5	Medium	BCmicrO|miRcode|mirmap_May_2021|MultiMiTar|RNA22
IDH3B	O43837		hsa-miR-103a-3p	0.302305	5	Medium	BCmicrO|miRcode|mirmap_May_2021|MultiMiTar|RNA22
IDH3B	O43837		hsa-miR-1182	0.295236	8	High	BCmicrO|bitargeting_May_2021|CoMeTa|MirAncesTar|miranda_May_2021|MiRNATIP|PITA_May_2021|RNA22
IDH3B	O43837		hsa-miR-671-5p	0.290206	10	Medium	BCmicrO|DIANA|MirAncesTar|miranda_May_2021|mirbase|mirmap_May_2021|MiRNATIP|mirzag|PITA_May_2021|RNA22
IDH3B	O43837		hsa-miR-492	0.284196	7	High	BCmicrO|bitargeting_May_2021|CoMeTa|MirAncesTar|miranda_May_2021|mirbase|RNA22
IDH3B	O43837		hsa-miR-122-5p	0.283037	8	Medium	bitargeting_May_2021|DIANA|MirAncesTar|miranda_May_2021|miRcode|mirCoX|MiRNATIP|RNA22
IDH3B	O43837		hsa-miR-132-3p	0.264001	8	Medium	bitargeting_May_2021|DIANA|MirAncesTar|miranda_May_2021|mirbase|miRcode|MiRNATIP|mirzag
IDH3B	O43837		hsa-miR-939-5p	0.259264	8	Medium	BCmicrO|bitargeting_May_2021|DIANA|MirAncesTar|miranda_May_2021|mirmap_May_2021|PITA_May_2021|RNA22
IDH3B	O43837		hsa-miR-92a-2-5p	0.257212	9	Medium	bitargeting_May_2021|DIANA|MirAncesTar|miranda_May_2021|mirbase|MiRNATIP|mirzag|RNA22|rnahybrid_May_2021
IDH3B	O43837		hsa-miR-574-5p	0.253884	7	Medium	BCmicrO|bitargeting_May_2021|MirAncesTar|miranda_May_2021|mirbase|MiRNATIP|RNA22
IDH3B	O43837		hsa-miR-4276	0.249604	6	High	bitargeting_May_2021|MirAncesTar|MiRNATIP|mirzag|PACCMIT|RNA22
IDH3B	O43837		hsa-miR-6808-5p	0.246469	7	Medium	bitargeting_May_2021|MirAncesTar|miranda_May_2021|miRDB_v6|mirmap_May_2021|MiRNATIP|PITA_May_2021
IDH3B	O43837		hsa-miR-3151-5p	0.246442	8	High	bitargeting_May_2021|DIANA|MirAncesTar|miranda_May_2021|MiRNATIP|mirzag|RNA22|rnahybrid_May_2021
IDH3B	O43837		hsa-miR-4428	0.243209	8	Medium	bitargeting_May_2021|MBStar|MirAncesTar|miranda_May_2021|miRDB_v6|mirmap_May_2021|MiRNATIP|PITA_May_2021
IDH3B	O43837		hsa-miR-1207-5p	0.242138	9	Medium	BCmicrO|bitargeting_May_2021|MirAncesTar|miranda_May_2021|mirmap_May_2021|MiRNATIP|PITA_May_2021|RNA22|rnahybrid_May_2021
IDH3B	O43837		hsa-miR-6756-5p	0.23921	7	Medium	MirAncesTar|miranda_May_2021|MiRNATIP|mirzag|PITA_May_2021|RNA22|rnahybrid_May_2021
IDH3B	O43837		hsa-miR-4793-3p	0.231557	6	Medium	DIANA|MirAncesTar|miranda_May_2021|MirSNPInTarget|mirzag|PITA_May_2021
IDH3B	O43837		hsa-miR-502-5p	0.230053	7	Medium	BCmicrO|bitargeting_May_2021|DIANA|MirAncesTar|miranda_May_2021|mirbase|MiRNATIP
IDH3B	O43837		hsa-miR-622	0.226754	8	Medium	bitargeting_May_2021|DIANA|MirAncesTar|miranda_May_2021|mirbase|MiRNATIP|mirzag|RNA22
IDH3B	O43837		hsa-miR-3918	0.223501	9	Medium	bitargeting_May_2021|DIANA|MirAncesTar|miranda_May_2021|mirmap_May_2021|MiRNATIP|MirSNPInTarget|PITA_May_2021|RNA22
IDH3B	O43837		hsa-miR-6893-5p	0.217343	7	Medium	bitargeting_May_2021|MirAncesTar|miranda_May_2021|miRDB_v6|mirmap_May_2021|MiRNATIP|PITA_May_2021
IDH3B	O43837		hsa-miR-644a	0.216273	6	Medium	BCmicrO|bitargeting_May_2021|MirAncesTar|MiRNATIP|MultiMiTar|RNA22
IDH3B	O43837		hsa-miR-6822-3p	0.214349	7	Very High	bitargeting_May_2021|MirAncesTar|miranda_May_2021|MiRNATIP|mirzag|PITA_May_2021|RNA22
IDH3B	O43837		hsa-miR-486-3p	0.214011	8	Medium	BCmicrO|bitargeting_May_2021|MirAncesTar|mirbase|mirmap_May_2021|MiRNATIP|mirzag|RNA22
IDH3B	O43837		hsa-miR-6721-5p	0.213127	8	Medium	bitargeting_May_2021|MirAncesTar|miranda_May_2021|miRDB_v6|mirmap_May_2021|PITA_May_2021|RNA22|rnahybrid_May_2021
IDH3B	O43837		hsa-miR-509-5p	0.211918	7	Medium	BCmicrO|DIANA|MirAncesTar|miranda_May_2021|MiRNATIP|MultiMiTar|PITA_May_2021
IDH3B	O43837		hsa-miR-885-3p	0.211039	6	Medium	bitargeting_May_2021|MirAncesTar|mirbase|mirmap_May_2021|MultiMiTar|RNA22
IDH3B	O43837		hsa-miR-153-3p	0.208281	6	Medium	BCmicrO|CoMeTa|MirAncesTar|miranda_May_2021|mirbase|RNA22
IDH3B	O43837		hsa-miR-591	0.208011	5	High	BCmicrO|bitargeting_May_2021|MirAncesTar|mirbase|mirzag
IDH3B	O43837		hsa-miR-491-5p	0.206555	5	Medium	BCmicrO|MirAncesTar|mirzag|MultiMiTar|RNA22
IDH3B	O43837		hsa-miR-4690-5p	0.205928	8	Medium	bitargeting_May_2021|MirAncesTar|miranda_May_2021|miRDB_v6|mirmap_May_2021|MiRNATIP|PITA_May_2021|rnahybrid_May_2021
IDH3B	O43837		hsa-miR-4695-5p	0.204109	8	Medium	bitargeting_May_2021|MBStar|MirAncesTar|miranda_May_2021|mirmap_May_2021|MiRNATIP|PITA_May_2021|RNA22
IDH3B	O43837		hsa-miR-1206	0.200229	7	Medium	BCmicrO|DIANA|MBStar|MirAncesTar|miranda_May_2021|MiRNATIP|RNA22
IDH3B	O43837		hsa-miR-4533	0.195658	6	Medium	MirAncesTar|miranda_May_2021|miRDB_v6|mirmap_May_2021|MiRNATIP|PITA_May_2021
IDH3B	O43837		hsa-miR-3175	0.192455	7	Medium	DIANA|MirAncesTar|miranda_May_2021|mirmap_May_2021|MiRNATIP|mirzag|PITA_May_2021
IDH3B	O43837		hsa-miR-4257	0.192363	5	Medium	bitargeting_May_2021|MirAncesTar|mirmap_May_2021|MirSNPInTarget|mirzag
IDH3B	O43837		hsa-miR-6879-5p	0.187896	7	Medium	bitargeting_May_2021|MirAncesTar|miranda_May_2021|mirmap_May_2021|MiRNATIP|PITA_May_2021|RNA22
IDH3B	O43837		hsa-miR-1265	0.18765	8	Medium	BCmicrO|bitargeting_May_2021|MBStar|MirAncesTar|miranda_May_2021|mirCoX|MiRNATIP|RNA22
IDH3B	O43837		hsa-miR-4742-5p	0.185504	6	Medium	bitargeting_May_2021|MBStar|MirAncesTar|miranda_May_2021|miRDB_v6|mirmap_May_2021
IDH3B	O43837		hsa-miR-941	0.185068	7	Medium	BCmicrO|bitargeting_May_2021|MirAncesTar|miranda_May_2021|mirbase|mirmap_May_2021|RNA22
IDH3B	O43837		hsa-miR-6884-3p	0.182523	6	High	bitargeting_May_2021|MirAncesTar|miranda_May_2021|MiRNATIP|mirzag|PITA_May_2021
IDH3B	O43837		hsa-miR-4512	0.182402	7	Medium	DIANA|MirAncesTar|miranda_May_2021|mirmap_May_2021|MiRNATIP|MirSNPInTarget|RNA22
IDH3B	O43837		hsa-miR-4472	0.180431	7	Medium	bitargeting_May_2021|DIANA|MBStar|MirAncesTar|mirzag|RNA22|rnahybrid_May_2021
IDH3B	O43837		hsa-miR-15b-3p	0.180279	5	Medium	MirAncesTar|miranda_May_2021|mirbase|MiRNATIP|mirzag
IDH3B	O43837		hsa-miR-4447	0.177589	6	Medium	bitargeting_May_2021|DIANA|MBStar|MirAncesTar|mirzag|RNA22
IDH3B	O43837		hsa-miR-7106-5p	0.175307	7	Medium	bitargeting_May_2021|MirAncesTar|miranda_May_2021|mirmap_May_2021|MiRNATIP|PITA_May_2021|rnahybrid_May_2021
IDH3B	O43837		hsa-miR-6870-5p	0.174815	8	Medium	MirAncesTar|miranda_May_2021|mirmap_May_2021|MiRNATIP|mirzag|PITA_May_2021|RNA22|rnahybrid_May_2021
IDH3B	O43837		hsa-miR-4723-5p	0.173581	6	Medium	DIANA|MirAncesTar|miranda_May_2021|mirmap_May_2021|MiRNATIP|mirzag
IDH3B	O43837		hsa-miR-1236-3p	0.173475	6	Medium	BCmicrO|DIANA|MirAncesTar|miranda_May_2021|mirzag|RNA22
IDH3B	O43837		hsa-miR-6760-5p	0.172918	7	Medium	bitargeting_May_2021|MirAncesTar|miranda_May_2021|mirmap_May_2021|MiRNATIP|PITA_May_2021|RNA22
IDH3B	O43837		hsa-miR-1268a	0.1729	6	Medium	BCmicrO|bitargeting_May_2021|MirAncesTar|miRDB_v6|PITA_May_2021|RNA22
IDH3B	O43837		hsa-miR-6743-5p	0.172349	7	Medium	bitargeting_May_2021|MirAncesTar|miranda_May_2021|mirmap_May_2021|PITA_May_2021|RNA22|rnahybrid_May_2021
IDH3B	O43837		hsa-miR-3714	0.171453	8	Medium	bitargeting_May_2021|MirAncesTar|miranda_May_2021|mirmap_May_2021|mirzag|PITA_May_2021|RNA22|rnahybrid_May_2021
IDH3B	O43837		hsa-miR-3127-5p	0.170271	8	Medium	bitargeting_May_2021|MBStar|MirAncesTar|miranda_May_2021|mirmap_May_2021|MiRNATIP|RNA22|rnahybrid_May_2021
IDH3B	O43837		hsa-miR-611	0.169916	6	Medium	BCmicrO|bitargeting_May_2021|MirAncesTar|miranda_May_2021|mirbase|mirmap_May_2021
IDH3B	O43837		hsa-miR-4722-5p	0.169846	6	Medium	bitargeting_May_2021|MirAncesTar|miranda_May_2021|mirmap_May_2021|PITA_May_2021|RNA22
IDH3B	O43837		hsa-miR-4436b-3p	0.168979	8	Medium	bitargeting_May_2021|MirAncesTar|miranda_May_2021|mirmap_May_2021|MiRNATIP|PITA_May_2021|RNA22|rnahybrid_May_2021
IDH3B	O43837		hsa-miR-1827	0.168973	6	Medium	BCmicrO|bitargeting_May_2021|MBStar|MirAncesTar|miranda_May_2021|mirmap_May_2021
IDH3B	O43837		hsa-miR-130b-5p	0.167805	5	Medium	MBStar|MirAncesTar|miranda_May_2021|mirbase|RNA22
IDH3B	O43837		hsa-miR-7111-5p	0.166632	7	Medium	MirAncesTar|miranda_May_2021|mirmap_May_2021|MiRNATIP|mirzag|PITA_May_2021|RNA22
IDH3B	O43837		hsa-miR-3150a-3p	0.166287	7	Medium	bitargeting_May_2021|DIANA|MirAncesTar|miranda_May_2021|MiRNATIP|PITA_May_2021|RNA22
IDH3B	O43837		hsa-miR-6759-5p	0.165173	7	High	bitargeting_May_2021|MirAncesTar|miranda_May_2021|MiRNATIP|PITA_May_2021|RNA22|rnahybrid_May_2021
IDH3B	O43837		hsa-miR-6878-5p	0.164755	5	Medium	MirAncesTar|miranda_May_2021|mirmap_May_2021|MiRNATIP|mirzag
IDH3B	O43837		hsa-miR-1268b	0.162964	5	High	bitargeting_May_2021|MirAncesTar|miRDB_v6|PITA_May_2021|RNA22
IDH3B	O43837		hsa-miR-596	0.161013	7	Medium	BCmicrO|bitargeting_May_2021|MBStar|MirAncesTar|miranda_May_2021|MiRNATIP|RNA22
IDH3B	O43837		hsa-miR-4708-3p	0.16013	7	Medium	DIANA|MirAncesTar|miranda_May_2021|mirmap_May_2021|mirzag|PITA_May_2021|rnahybrid_May_2021
IDH3B	O43837		hsa-miR-580-3p	0.159727	4	Medium	BCmicrO|CoMeTa|MirAncesTar|miranda_May_2021
IDH3B	O43837		hsa-miR-573	0.158461	4	Medium	BCmicrO|DIANA|MirAncesTar|MultiMiTar
IDH3B	O43837		hsa-miR-383-5p	0.157972	6	Medium	BCmicrO|bitargeting_May_2021|MirAncesTar|miranda_May_2021|MiRNATIP|PITA_May_2021
IDH3B	O43837		hsa-miR-4665-5p	0.157031	6	Medium	DIANA|MBStar|MirAncesTar|miranda_May_2021|MiRNATIP|mirzag
IDH3B	O43837		hsa-miR-508-3p	0.156935	4	Medium	BCmicrO|MirAncesTar|miRcode|RNA22
IDH3B	O43837		hsa-miR-6775-5p	0.156586	7	Medium	bitargeting_May_2021|MirAncesTar|miranda_May_2021|mirmap_May_2021|MiRNATIP|PITA_May_2021|RNA22
IDH3B	O43837		hsa-miR-6809-5p	0.155833	7	Medium	bitargeting_May_2021|MirAncesTar|miranda_May_2021|mirmap_May_2021|mirzag|PITA_May_2021|RNA22
IDH3B	O43837		hsa-miR-6735-5p	0.154655	7	Medium	bitargeting_May_2021|MirAncesTar|miranda_May_2021|mirmap_May_2021|MiRNATIP|PITA_May_2021|RNA22
IDH3B	O43837		hsa-miR-6797-5p	0.153862	6	Medium	bitargeting_May_2021|MirAncesTar|miranda_May_2021|mirmap_May_2021|PITA_May_2021|RNA22
IDH3B	O43837		hsa-miR-8075	0.152708	6	Medium	bitargeting_May_2021|MirAncesTar|miranda_May_2021|MiRNATIP|PITA_May_2021|RNA22
IDH3B	O43837		hsa-miR-6766-5p	0.152217	7	Medium	bitargeting_May_2021|MirAncesTar|miranda_May_2021|mirmap_May_2021|mirzag|PITA_May_2021|RNA22
IDH3B	O43837		hsa-miR-4521	0.151933	6	Medium	bitargeting_May_2021|DIANA|MirAncesTar|miranda_May_2021|mirmap_May_2021|RNA22
IDH3B	O43837		hsa-miR-2277-3p	0.151814	6	Medium	DIANA|MirAncesTar|mirCoX|mirmap_May_2021|mirzag|RNA22
IDH3B	O43837		hsa-miR-6745	0.151034	6	Medium	bitargeting_May_2021|MirAncesTar|MiRNATIP|mirzag|PITA_May_2021|RNA22
IDH3B	O43837		hsa-miR-4457	0.150887	6	Medium	bitargeting_May_2021|DIANA|MirAncesTar|miranda_May_2021|mirmap_May_2021|RNA22
IDH3B	O43837		hsa-miR-4709-5p	0.150639	6	Medium	bitargeting_May_2021|MirAncesTar|miranda_May_2021|mirmap_May_2021|mirzag|RNA22
IDH3B	O43837		hsa-miR-136-3p	0.149702	5	High	bitargeting_May_2021|DIANA|MirAncesTar|mirbase|RNA22
IDH3B	O43837		hsa-miR-624-3p	0.145809	5	Medium	DIANA|MirAncesTar|miranda_May_2021|mirbase|mirmap_May_2021
IDH3B	O43837		hsa-miR-934	0.144947	6	Medium	BCmicrO|bitargeting_May_2021|MirAncesTar|miranda_May_2021|mirbase|RNA22
IDH3B	O43837		hsa-miR-4319	0.144683	5	Medium	bitargeting_May_2021|MirAncesTar|miRcode|MiRNATIP|RNA22
IDH3B	O43837		hsa-miR-4685-5p	0.142753	7	Medium	bitargeting_May_2021|MirAncesTar|miranda_May_2021|mirmap_May_2021|PITA_May_2021|RNA22|rnahybrid_May_2021
IDH3B	O43837		hsa-miR-6515-5p	0.142303	7	Medium	bitargeting_May_2021|MirAncesTar|miranda_May_2021|MiRNATIP|PITA_May_2021|RNA22|rnahybrid_May_2021
IDH3B	O43837		hsa-miR-211-3p	0.14172	6	Medium	bitargeting_May_2021|MBStar|MirAncesTar|mirmap_May_2021|MiRNATIP|RNA22
IDH3B	O43837		hsa-miR-134-3p	0.140483	5	High	MirAncesTar|miranda_May_2021|MiRNATIP|mirzag|RNA22
IDH3B	O43837		hsa-miR-7108-5p	0.139459	5	Medium	MirAncesTar|miranda_May_2021|MiRNATIP|mirzag|RNA22
IDH3B	O43837		hsa-miR-103b	0.139216	6	Medium	BCmicrO|DIANA|MirAncesTar|miranda_May_2021|MirSNPInTarget|RNA22
IDH3B	O43837		hsa-miR-659-3p	0.138484	5	Medium	BCmicrO|MirAncesTar|miranda_May_2021|mirbase|RNA22
IDH3B	O43837		hsa-miR-1205	0.138467	7	Medium	BCmicrO|bitargeting_May_2021|DIANA|MirAncesTar|miranda_May_2021|MiRNATIP|RNA22
IDH3B	O43837		hsa-miR-939-3p	0.137943	5	Medium	MirAncesTar|miranda_May_2021|mirzag|PITA_May_2021|RNA22
IDH3B	O43837		hsa-miR-6814-5p	0.136885	6	Medium	bitargeting_May_2021|MirAncesTar|miranda_May_2021|mirmap_May_2021|PITA_May_2021|RNA22
IDH3B	O43837		hsa-miR-6733-5p	0.136553	5	Medium	MirAncesTar|miRDB_v6|mirmap_May_2021|MiRNATIP|PITA_May_2021
IDH3B	O43837		hsa-miR-7155-3p	0.135894	6	Medium	bitargeting_May_2021|MirAncesTar|miranda_May_2021|mirmap_May_2021|MiRNATIP|mirzag
IDH3B	O43837		hsa-miR-6086	0.135606	6	Medium	bitargeting_May_2021|MirAncesTar|miranda_May_2021|MiRNATIP|PITA_May_2021|RNA22
IDH3B	O43837		hsa-miR-21-3p	0.135595	5	Medium	MBStar|MirAncesTar|mirbase|mirmap_May_2021|RNA22
IDH3B	O43837		hsa-miR-4632-5p	0.135572	7	Medium	bitargeting_May_2021|MirAncesTar|miranda_May_2021|mirmap_May_2021|PITA_May_2021|RNA22|rnahybrid_May_2021
IDH3B	O43837		hsa-miR-4436a	0.135003	6	Medium	bitargeting_May_2021|MirAncesTar|miranda_May_2021|mirmap_May_2021|MiRNATIP|RNA22
IDH3B	O43837		hsa-miR-4520-3p	0.134207	4	Medium	DIANA|MirAncesTar|miranda_May_2021|MiRNATIP
IDH3B	O43837		hsa-miR-542-3p	0.132748	4	Medium	BCmicrO|MirAncesTar|MultiMiTar|RNA22
IDH3B	O43837		hsa-miR-6884-5p	0.132254	5	Medium	bitargeting_May_2021|MirAncesTar|miranda_May_2021|MiRNATIP|PITA_May_2021
IDH3B	O43837		hsa-miR-6778-5p	0.132148	7	Medium	bitargeting_May_2021|MirAncesTar|miranda_May_2021|MiRNATIP|PITA_May_2021|RNA22|rnahybrid_May_2021
IDH3B	O43837		hsa-miR-6753-5p	0.131353	6	Medium	MirAncesTar|miranda_May_2021|mirmap_May_2021|MiRNATIP|PITA_May_2021|RNA22
IDH3B	O43837		hsa-miR-1915-3p	0.131056	6	Medium	BCmicrO|bitargeting_May_2021|MirAncesTar|mirmap_May_2021|MiRNATIP|PITA_May_2021
IDH3B	O43837		hsa-miR-4677-5p	0.130553	5	Medium	DIANA|MirAncesTar|miranda_May_2021|MiRNATIP|RNA22
IDH3B	O43837		hsa-miR-6746-3p	0.127934	6	Medium	bitargeting_May_2021|MirAncesTar|miranda_May_2021|mirmap_May_2021|MiRNATIP|RNA22
IDH3B	O43837		hsa-miR-4525	0.127772	6	Medium	MBStar|MirAncesTar|mirmap_May_2021|mirzag|PITA_May_2021|RNA22
IDH3B	O43837		hsa-miR-6751-5p	0.126723	6	Medium	MirAncesTar|miranda_May_2021|MiRNATIP|PITA_May_2021|RNA22|rnahybrid_May_2021
IDH3B	O43837		hsa-miR-34c-3p	0.126722	4	Medium	BCmicrO|MirAncesTar|mirbase|MiRNATIP
IDH3B	O43837		hsa-miR-1286	0.126715	5	Medium	bitargeting_May_2021|MirAncesTar|miranda_May_2021|mirmap_May_2021|MiRNATIP
IDH3B	O43837		hsa-miR-6763-5p	0.126251	5	Medium	MirAncesTar|miranda_May_2021|MiRNATIP|PITA_May_2021|RNA22
IDH3B	O43837		hsa-miR-558	0.125682	4	Medium	BCmicrO|MirAncesTar|miranda_May_2021|miRDB_v6
IDH3B	O43837		hsa-miR-3197	0.125647	6	Medium	bitargeting_May_2021|MirAncesTar|miranda_May_2021|mirmap_May_2021|MiRNATIP|RNA22
IDH3B	O43837		hsa-miR-6132	0.125059	6	Medium	bitargeting_May_2021|MirAncesTar|miranda_May_2021|mirmap_May_2021|PITA_May_2021|RNA22
IDH3B	O43837		hsa-miR-623	0.124501	6	Medium	BCmicrO|bitargeting_May_2021|MirAncesTar|miranda_May_2021|MiRNATIP|RNA22
IDH3B	O43837		hsa-miR-2861	0.123538	6	Medium	bitargeting_May_2021|MirAncesTar|miranda_May_2021|MiRNATIP|PITA_May_2021|RNA22
IDH3B	O43837		hsa-miR-5010-5p	0.123108	6	Medium	MBStar|MirAncesTar|mirmap_May_2021|mirzag|PITA_May_2021|RNA22
IDH3B	O43837		hsa-miR-663b	0.122458	4	Medium	BCmicrO|MirAncesTar|mirzag|RNA22
IDH3B	O43837		hsa-miR-1233-5p	0.122171	6	Medium	bitargeting_May_2021|MirAncesTar|miranda_May_2021|MiRNATIP|PITA_May_2021|rnahybrid_May_2021
IDH3B	O43837		hsa-miR-549a-3p	0.121957	5	Medium	BCmicrO|bitargeting_May_2021|mirbase|mirmap_May_2021|RNA22
IDH3B	O43837		hsa-miR-200b-5p	0.12128	5	Medium	bitargeting_May_2021|MirAncesTar|mirbase|MiRNATIP|RNA22
IDH3B	O43837		hsa-miR-6748-5p	0.121014	7	Medium	bitargeting_May_2021|MirAncesTar|miranda_May_2021|MiRNATIP|PITA_May_2021|RNA22|rnahybrid_May_2021
IDH3B	O43837		hsa-miR-6823-5p	0.120834	5	Medium	MirAncesTar|miranda_May_2021|MiRNATIP|PITA_May_2021|RNA22
IDH3B	O43837		hsa-miR-6860	0.120287	6	Medium	bitargeting_May_2021|MirAncesTar|miranda_May_2021|PITA_May_2021|RNA22|rnahybrid_May_2021
IDH3B	O43837		hsa-miR-635	0.12019	4	Medium	BCmicrO|bitargeting_May_2021|MirAncesTar|mirbase
IDH3B	O43837		hsa-miR-5697	0.120066	4	Medium	MirAncesTar|miranda_May_2021|MiRNATIP|MirSNPInTarget
IDH3B	O43837		hsa-miR-5581-5p	0.119717	5	Medium	bitargeting_May_2021|MirAncesTar|miranda_May_2021|MiRNATIP|PITA_May_2021
IDH3B	O43837		hsa-miR-6881-5p	0.11971	7	Medium	bitargeting_May_2021|MirAncesTar|miranda_May_2021|mirmap_May_2021|PITA_May_2021|RNA22|rnahybrid_May_2021
IDH3B	O43837		hsa-miR-4478	0.119205	5	Medium	bitargeting_May_2021|MirAncesTar|MiRNATIP|PITA_May_2021|rnahybrid_May_2021
IDH3B	O43837		hsa-miR-6888-5p	0.118907	5	Medium	bitargeting_May_2021|MirAncesTar|miranda_May_2021|mirmap_May_2021|MiRNATIP
IDH3B	O43837		hsa-miR-6072	0.118285	6	Medium	bitargeting_May_2021|MirAncesTar|miranda_May_2021|MiRNATIP|PITA_May_2021|RNA22
IDH3B	O43837		hsa-miR-4674	0.117902	5	Medium	MirAncesTar|miranda_May_2021|MiRNATIP|mirzag|RNA22
IDH3B	O43837		hsa-miR-4753-5p	0.116857	6	Medium	bitargeting_May_2021|MirAncesTar|miranda_May_2021|mirmap_May_2021|MiRNATIP|PITA_May_2021
IDH3B	O43837		hsa-miR-6739-5p	0.116347	4	Medium	MirAncesTar|miRDB_v6|mirmap_May_2021|MiRNATIP
IDH3B	O43837		hsa-miR-5008-3p	0.116221	5	Medium	bitargeting_May_2021|MirAncesTar|miranda_May_2021|MiRNATIP|RNA22
IDH3B	O43837		hsa-miR-6075	0.114551	5	Medium	MirAncesTar|miranda_May_2021|mirmap_May_2021|mirzag|PITA_May_2021
IDH3B	O43837		hsa-miR-509-3-5p	0.113908	5	Medium	BCmicrO|DIANA|MirAncesTar|MiRNATIP|RNA22
IDH3B	O43837		hsa-miR-6804-5p	0.113793	4	Medium	bitargeting_May_2021|MirAncesTar|MiRNATIP|RNA22
IDH3B	O43837		hsa-miR-711	0.113263	6	Medium	bitargeting_May_2021|MirAncesTar|miranda_May_2021|mirmap_May_2021|MiRNATIP|rnahybrid_May_2021
IDH3B	O43837		hsa-miR-6801-5p	0.112826	5	Medium	bitargeting_May_2021|MirAncesTar|miranda_May_2021|PITA_May_2021|rnahybrid_May_2021
IDH3B	O43837		hsa-miR-6802-5p	0.112622	5	Medium	bitargeting_May_2021|MirAncesTar|MiRNATIP|PITA_May_2021|RNA22
IDH3B	O43837		hsa-miR-6089	0.112352	6	Medium	bitargeting_May_2021|MirAncesTar|mirmap_May_2021|PITA_May_2021|RNA22|rnahybrid_May_2021
IDH3B	O43837		hsa-miR-4786-5p	0.111099	5	Medium	bitargeting_May_2021|MirAncesTar|miranda_May_2021|mirmap_May_2021|PITA_May_2021
IDH3B	O43837		hsa-miR-6837-5p	0.11082	5	Medium	bitargeting_May_2021|MirAncesTar|miranda_May_2021|mirmap_May_2021|PITA_May_2021
IDH3B	O43837		hsa-miR-6862-3p	0.110552	5	Medium	MirAncesTar|miranda_May_2021|MiRNATIP|PITA_May_2021|RNA22
IDH3B	O43837		hsa-miR-6812-5p	0.110523	5	Medium	bitargeting_May_2021|MirAncesTar|miranda_May_2021|MiRNATIP|RNA22
IDH3B	O43837		hsa-miR-6747-5p	0.109915	5	Medium	bitargeting_May_2021|MirAncesTar|miranda_May_2021|PITA_May_2021|RNA22
IDH3B	O43837		hsa-miR-1234-3p	0.109699	6	Medium	BCmicrO|MBStar|MirAncesTar|mirmap_May_2021|MiRNATIP|RNA22
IDH3B	O43837		hsa-miR-1294	0.109527	5	Medium	BCmicrO|bitargeting_May_2021|MirAncesTar|PITA_May_2021|RNA22
IDH3B	O43837		hsa-miR-5699-3p	0.109512	4	Medium	bitargeting_May_2021|MirAncesTar|miranda_May_2021|MiRNATIP
IDH3B	O43837		hsa-miR-3137	0.109299	5	Medium	bitargeting_May_2021|MirAncesTar|miranda_May_2021|PITA_May_2021|RNA22
IDH3B	O43837		hsa-miR-8080	0.108938	5	Medium	bitargeting_May_2021|MirAncesTar|miranda_May_2021|mirmap_May_2021|MiRNATIP
IDH3B	O43837		hsa-miR-6783-3p	0.108311	5	Medium	MirAncesTar|miranda_May_2021|MiRNATIP|PITA_May_2021|RNA22
IDH3B	O43837		hsa-miR-6752-5p	0.108075	6	Medium	bitargeting_May_2021|MirAncesTar|miranda_May_2021|PITA_May_2021|RNA22|rnahybrid_May_2021
IDH3B	O43837		hsa-miR-1226-3p	0.107943	5	Medium	DIANA|MirAncesTar|mirCoX|PITA_May_2021|RNA22
IDH3B	O43837		hsa-miR-7113-5p	0.107502	5	Medium	bitargeting_May_2021|MirAncesTar|miranda_May_2021|mirmap_May_2021|RNA22
IDH3B	O43837		hsa-miR-3120-5p	0.106693	4	Medium	bitargeting_May_2021|MirAncesTar|MiRNATIP|RNA22
IDH3B	O43837		hsa-miR-6788-5p	0.106631	5	Medium	MirAncesTar|miranda_May_2021|MiRNATIP|PITA_May_2021|RNA22
IDH3B	O43837		hsa-miR-4716-5p	0.106392	5	Medium	bitargeting_May_2021|MirAncesTar|miranda_May_2021|mirzag|RNA22
IDH3B	O43837		hsa-miR-551a	0.104771	5	Medium	BCmicrO|MirAncesTar|mirbase|MiRNATIP|RNA22
IDH3B	O43837		hsa-miR-3189-3p	0.104674	4	Medium	bitargeting_May_2021|MirAncesTar|miRDB_v6|RNA22
IDH3B	O43837		hsa-miR-3141	0.104398	5	Medium	bitargeting_May_2021|MirAncesTar|mirmap_May_2021|PITA_May_2021|RNA22
IDH3B	O43837		hsa-miR-6836-5p	0.104186	5	Medium	bitargeting_May_2021|MirAncesTar|mirmap_May_2021|PITA_May_2021|RNA22
IDH3B	O43837		hsa-miR-7847-3p	0.104091	5	Medium	bitargeting_May_2021|MirAncesTar|MiRNATIP|PITA_May_2021|RNA22
IDH3B	O43837		hsa-miR-4530	0.104055	6	Medium	bitargeting_May_2021|DIANA|MirAncesTar|mirmap_May_2021|RNA22|rnahybrid_May_2021
IDH3B	O43837		hsa-miR-6754-3p	0.103896	5	Medium	bitargeting_May_2021|MirAncesTar|miranda_May_2021|MiRNATIP|RNA22
IDH3B	O43837		hsa-miR-6511b-5p	0.10336	5	Medium	MirAncesTar|miranda_May_2021|MiRNATIP|PITA_May_2021|RNA22
IDH3B	O43837		hsa-miR-6742-5p	0.103232	5	Medium	bitargeting_May_2021|MirAncesTar|mirzag|PITA_May_2021|RNA22
IDH3B	O43837		hsa-miR-6726-5p	0.103198	5	Medium	MirAncesTar|miranda_May_2021|mirmap_May_2021|MiRNATIP|RNA22
IDH3B	O43837		hsa-miR-4691-3p	0.102958	4	Medium	MirAncesTar|mirmap_May_2021|MirSNPInTarget|RNA22
IDH3B	O43837		hsa-miR-6866-5p	0.10279	5	Medium	bitargeting_May_2021|MirAncesTar|miranda_May_2021|mirmap_May_2021|MiRNATIP
IDH3B	O43837		hsa-miR-5006-5p	0.102609	5	Medium	MirAncesTar|miranda_May_2021|PITA_May_2021|RNA22|rnahybrid_May_2021
IDH3B	O43837		hsa-miR-7156-3p	0.102127	4	Medium	bitargeting_May_2021|MirAncesTar|miranda_May_2021|MiRNATIP
IDH3B	O43837		hsa-miR-4649-5p	0.101933	6	Medium	bitargeting_May_2021|MirAncesTar|mirmap_May_2021|MiRNATIP|PITA_May_2021|RNA22
IDH3B	O43837		hsa-miR-6819-5p	0.101908	5	Medium	bitargeting_May_2021|MirAncesTar|miranda_May_2021|MiRNATIP|RNA22
IDH3B	O43837		hsa-miR-6816-5p	0.101795	5	Medium	MirAncesTar|mirmap_May_2021|MiRNATIP|RNA22|rnahybrid_May_2021
IDH3B	O43837		hsa-miR-187-3p	0.101168	6	Medium	BCmicrO|bitargeting_May_2021|MirAncesTar|miranda_May_2021|MiRNATIP|rnahybrid_May_2021
IDH3B	O43837		hsa-miR-4474-3p	0.101021	5	Medium	bitargeting_May_2021|MirAncesTar|miranda_May_2021|MiRNATIP|RNA22
IDH3B	O43837		hsa-miR-4632-3p	0.100731	5	Medium	bitargeting_May_2021|MirAncesTar|mirmap_May_2021|MiRNATIP|PITA_May_2021
IDH3B	O43837		hsa-miR-6866-3p	0.100575	4	Medium	bitargeting_May_2021|MirAncesTar|miranda_May_2021|PITA_May_2021
IDH3B	O43837		hsa-miR-4714-3p	0.0999136	4	Medium	bitargeting_May_2021|DIANA|MirAncesTar|miranda_May_2021
IDH3B	O43837		hsa-miR-6796-5p	0.0992296	4	Medium	MirAncesTar|miranda_May_2021|mirzag|RNA22
IDH3B	O43837		hsa-miR-6885-5p	0.0991327	5	Medium	MirAncesTar|miranda_May_2021|MiRNATIP|PITA_May_2021|RNA22
IDH3B	O43837		hsa-miR-4761-5p	0.0989999	4	Medium	DIANA|MirAncesTar|miranda_May_2021|MiRNATIP
IDH3B	O43837		hsa-miR-6785-3p	0.0978347	5	High	bitargeting_May_2021|MirAncesTar|mirmap_May_2021|MiRNATIP|PITA_May_2021
IDH3B	O43837		hsa-miR-6747-3p	0.096625	4	Medium	bitargeting_May_2021|MirAncesTar|miranda_May_2021|RNA22
IDH3B	O43837		hsa-miR-6749-5p	0.0965704	4	Medium	MirAncesTar|miranda_May_2021|MiRNATIP|RNA22
IDH3B	O43837		hsa-miR-3908	0.0963798	4	Medium	MirAncesTar|miranda_May_2021|mirzag|RNA22
IDH3B	O43837		hsa-miR-361-3p	0.0963406	6	Medium	BCmicrO|bitargeting_May_2021|MirAncesTar|mirmap_May_2021|MiRNATIP|PITA_May_2021
IDH3B	O43837		hsa-miR-3922-5p	0.095653	5	Medium	MirAncesTar|mirmap_May_2021|MiRNATIP|PITA_May_2021|RNA22
IDH3B	O43837		hsa-miR-1225-5p	0.0950557	4	Medium	BCmicrO|MirAncesTar|PITA_May_2021|RNA22
IDH3B	O43837		hsa-miR-4327	0.0943898	5	Medium	MBStar|MirAncesTar|MiRNATIP|PITA_May_2021|RNA22
IDH3B	O43837		hsa-miR-6514-3p	0.0938606	4	Medium	MirAncesTar|miranda_May_2021|MiRNATIP|RNA22
IDH3B	O43837		hsa-miR-5191	0.0936511	4	Medium	bitargeting_May_2021|MirAncesTar|mirmap_May_2021|MiRNATIP
IDH3B	O43837		hsa-miR-551b-3p	0.0932725	5	Medium	BCmicrO|MirAncesTar|mirbase|MiRNATIP|RNA22
IDH3B	O43837		hsa-miR-7112-5p	0.0928003	4	Medium	MirAncesTar|miranda_May_2021|PITA_May_2021|rnahybrid_May_2021
IDH3B	O43837		hsa-miR-6828-5p	0.0927487	5	Medium	MirAncesTar|mirmap_May_2021|MiRNATIP|PITA_May_2021|RNA22
IDH3B	O43837		hsa-miR-1295b-5p	0.0927313	5	Medium	DIANA|MirAncesTar|mirmap_May_2021|MiRNATIP|RNA22
IDH3B	O43837		hsa-miR-3130-3p	0.0925152	5	Medium	DIANA|MirAncesTar|mirmap_May_2021|MiRNATIP|RNA22
IDH3B	O43837		hsa-miR-337-3p	0.0917761	4	Medium	BCmicrO|MirAncesTar|mirbase|MiRNATIP
IDH3B	O43837		hsa-miR-3911	0.0917729	5	Medium	bitargeting_May_2021|MirAncesTar|MiRNATIP|PITA_May_2021|RNA22
IDH3B	O43837		hsa-miR-6830-5p	0.0911717	4	Medium	MirAncesTar|miranda_May_2021|mirmap_May_2021|MiRNATIP
IDH3B	O43837		hsa-miR-3198	0.090902	5	Medium	bitargeting_May_2021|MirAncesTar|miranda_May_2021|MiRNATIP|RNA22
IDH3B	O43837		hsa-miR-6865-5p	0.0908681	5	Medium	bitargeting_May_2021|MirAncesTar|miranda_May_2021|mirmap_May_2021|RNA22
IDH3B	O43837		hsa-miR-6784-5p	0.0907668	4	Medium	bitargeting_May_2021|mirmap_May_2021|MiRNATIP|RNA22
IDH3B	O43837		hsa-miR-320e	0.0907481	4	Medium	bitargeting_May_2021|MirAncesTar|mirmap_May_2021|MiRNATIP
IDH3B	O43837		hsa-miR-8081	0.0898845	4	Medium	bitargeting_May_2021|miranda_May_2021|MiRNATIP|RNA22
IDH3B	O43837		hsa-miR-6847-3p	0.089337	5	Medium	bitargeting_May_2021|MirAncesTar|miranda_May_2021|MiRNATIP|RNA22
IDH3B	O43837		hsa-miR-363-5p	0.0890404	4	Medium	MirAncesTar|MiRNATIP|mirzag|RNA22
IDH3B	O43837		hsa-miR-6890-5p	0.086368	5	Medium	bitargeting_May_2021|MirAncesTar|PITA_May_2021|RNA22|rnahybrid_May_2021
IDH3B	O43837		hsa-miR-499b-5p	0.0855211	4	Medium	bitargeting_May_2021|miranda_May_2021|MiRNATIP|RNA22
IDH3B	O43837		hsa-miR-1251-5p	0.0850442	5	Medium	BCmicrO|bitargeting_May_2021|MirAncesTar|miranda_May_2021|RNA22
IDH3B	O43837		hsa-miR-6810-5p	0.0846812	4	Medium	MirAncesTar|MiRNATIP|PITA_May_2021|RNA22
IDH3B	O43837		hsa-miR-1912-3p	0.0845489	4	Medium	BCmicrO|DIANA|MirAncesTar|mirmap_May_2021
IDH3B	O43837		hsa-miR-2117	0.0842828	5	Medium	DIANA|MirAncesTar|mirCoX|MiRNATIP|RNA22
IDH3B	O43837		hsa-miR-6837-3p	0.0836611	5	Medium	bitargeting_May_2021|MirAncesTar|miranda_May_2021|MiRNATIP|RNA22
IDH3B	O43837		hsa-miR-135a-3p	0.0836531	4	Medium	MirAncesTar|miranda_May_2021|MiRNATIP|RNA22
IDH3B	O43837		hsa-miR-6735-3p	0.0833846	4	Medium	MirAncesTar|mirzag|PITA_May_2021|RNA22
IDH3B	O43837		hsa-miR-6790-5p	0.0820716	4	Medium	MirAncesTar|miranda_May_2021|PITA_May_2021|RNA22
IDH3B	O43837		hsa-miR-4283	0.0800486	4	Medium	bitargeting_May_2021|MBStar|MirAncesTar|RNA22
IDH3B	O43837		hsa-miR-555	0.0795866	4	Medium	BCmicrO|MirAncesTar|mirmap_May_2021|RNA22
IDH3B	O43837		hsa-miR-6886-5p	0.0786544	4	Medium	MirAncesTar|MiRNATIP|PITA_May_2021|RNA22
IDH3B	O43837		hsa-miR-6841-3p	0.0786423	4	Medium	MirAncesTar|miranda_May_2021|MiRNATIP|RNA22
IDH3B	O43837		hsa-miR-6069	0.0785388	5	Medium	MirAncesTar|mirmap_May_2021|MiRNATIP|PITA_May_2021|RNA22
IDH3B	O43837		hsa-miR-6883-3p	0.0775413	4	Medium	MirAncesTar|miranda_May_2021|MiRNATIP|PITA_May_2021
IDH3B	O43837		hsa-miR-3130-5p	0.0772246	4	Medium	DIANA|MirAncesTar|mirmap_May_2021|RNA22
IDH3B	O43837		hsa-miR-4293	0.0769455	4	Medium	MBStar|MirAncesTar|MiRNATIP|RNA22
IDH3B	O43837		hsa-miR-1251-3p	0.076662	4	Medium	MirAncesTar|miranda_May_2021|PITA_May_2021|RNA22
IDH3B	O43837		hsa-miR-6511b-3p	0.0764994	4	Medium	MirAncesTar|MiRNATIP|PITA_May_2021|RNA22
IDH3B	O43837		hsa-miR-7157-3p	0.0753524	4	Medium	MirAncesTar|miranda_May_2021|MiRNATIP|RNA22
IDH3B	O43837		hsa-miR-6821-5p	0.0751334	4	Medium	MirAncesTar|MiRNATIP|PITA_May_2021|RNA22
IDH3B	O43837		hsa-miR-6864-5p	0.074486	4	Medium	MirAncesTar|miranda_May_2021|MiRNATIP|RNA22
IDH3B	O43837		hsa-miR-8069	0.0715796	4	Medium	MirAncesTar|MiRNATIP|PITA_May_2021|RNA22
IDH3B	O43837		hsa-miR-3136-3p	0.07151	4	Medium	MirAncesTar|miranda_May_2021|mirmap_May_2021|MiRNATIP
IDH3B	O43837		hsa-miR-192-3p	0.0701258	4	Medium	bitargeting_May_2021|MirAncesTar|miranda_May_2021|MiRNATIP
IDH3B	O43837		hsa-miR-6858-3p	0.0692205	4	Medium	MirAncesTar|mirmap_May_2021|MiRNATIP|RNA22
IDH3B	O43837		hsa-miR-3200-3p	0.0691179	4	Medium	bitargeting_May_2021|MirAncesTar|MiRNATIP|RNA22
IDH3B	O43837		hsa-miR-4663	0.0674938	4	Medium	MirAncesTar|MiRNATIP|PITA_May_2021|RNA22
IDH3B	O43837		hsa-miR-1247-5p	0.0664626	4	Medium	BCmicrO|MirAncesTar|MiRNATIP|PITA_May_2021
IDH3B	O43837		hsa-miR-548q	0.0662687	4	Medium	bitargeting_May_2021|MirAncesTar|MiRNATIP|RNA22
IDH3B	O43837		hsa-miR-4707-3p	0.0661058	4	Medium	MirAncesTar|MiRNATIP|PITA_May_2021|RNA22
IDH3B	O43837		hsa-miR-6755-5p	0.0649267	4	Medium	bitargeting_May_2021|MirAncesTar|mirmap_May_2021|RNA22
IDH3B	O43837		hsa-miR-6741-5p	0.0632781	4	Medium	MirAncesTar|MiRNATIP|PITA_May_2021|RNA22
IDH3B	O43837		hsa-miR-6743-3p	0.0595009	4	Medium	bitargeting_May_2021|MirAncesTar|mirmap_May_2021|RNA22
IDH3B	O43837		hsa-miR-7106-3p	0.0584631	4	Medium	MirAncesTar|miranda_May_2021|MiRNATIP|RNA22
IDH3B	O43837		hsa-miR-6798-3p	0.0558727	4	Medium	MirAncesTar|mirmap_May_2021|MiRNATIP|RNA22
IDH3B	O43837		hsa-miR-7152-3p	0.0514097	4	Medium	MirAncesTar|MiRNATIP|RNA22|rnahybrid_May_2021

## Sheet: mirDIP_MAP3K4
Generated at: 2022/11/17 03:56:09
mirDIP version: 5.2.8.1.
Database version: 5.2.3.1
Gene Symbol - MAP3K4
Micro RNA -
Minimum Score - Very High
Results (24)
Gene Symbol	Uniprot	Pseudogene	MicroRNA	Integrated Score	Number of Sources	Score Class	Sources
MAP3K4	Q9Y6R4		hsa-miR-199a-3p	0.920434	15	Very High	BCmicrO|CoMeTa|Cupid|DIANA|MBStar|MirAncesTar|mirbase|miRDB_v6|MiRNATIP|miRTar2GO|MirTar2|mirzag|MultiMiTar|PACCMIT|TargetScan_v7_2
MAP3K4	Q9Y6R4		hsa-miR-199b-3p	0.904513	14	Very High	BCmicrO|CoMeTa|Cupid|DIANA|MBStar|MirAncesTar|miRDB_v6|MiRNATIP|MirTar2|mirzag|MultiMiTar|PACCMIT|RNA22|TargetScan_v7_2
MAP3K4	Q9Y6R4		hsa-miR-152-3p	0.8665	17	Very High	BCmicrO|bitargeting_May_2021|CoMeTa|Cupid|DIANA|MBStar|MirAncesTar|miranda_May_2021|mirbase|miRcode|mirCoX|miRDB_v6|MiRNATIP|mirzag|MultiMiTar|RNA22|TargetScan_v7_2
MAP3K4	Q9Y6R4		hsa-miR-148a-3p	0.856787	16	Very High	BCmicrO|bitargeting_May_2021|CoMeTa|Cupid|DIANA|MBStar|MirAncesTar|miranda_May_2021|mirbase|mirCoX|miRDB_v6|MiRNATIP|MirTar2|mirzag|MultiMiTar|TargetScan_v7_2
MAP3K4	Q9Y6R4		hsa-miR-148b-3p	0.849594	17	Very High	BCmicrO|bitargeting_May_2021|CoMeTa|Cupid|DIANA|MBStar|MirAncesTar|miranda_May_2021|mirbase|mirCoX|miRDB_v6|MiRNATIP|MirTar2|mirzag|MultiMiTar|RNA22|TargetScan_v7_2
MAP3K4	Q9Y6R4		hsa-miR-183-5p	0.774324	13	Very High	CoMeTa|Cupid|DIANA|MirAncesTar|miranda_May_2021|mirbase|miRcode|miRDB_v6|MiRNATIP|miRTar2GO|MirTar2|mirzag|PACCMIT
MAP3K4	Q9Y6R4		hsa-miR-1301-3p	0.762516	15	Very High	BCmicrO|bitargeting_May_2021|CoMeTa|Cupid|DIANA|MirAncesTar|miranda_May_2021|miRDB_v6|MiRNATIP|miRTar2GO|MirTar2|mirzag|PACCMIT|PITA_May_2021|RNA22
MAP3K4	Q9Y6R4		hsa-miR-3129-5p	0.718248	11	Very High	bitargeting_May_2021|Cupid|DIANA|MirAncesTar|miranda_May_2021|miRDB_v6|MiRNATIP|MirTar2|mirzag|PACCMIT|RNA22
MAP3K4	Q9Y6R4		hsa-miR-3619-5p	0.64839	14	Very High	bitargeting_May_2021|Cupid|DIANA|MBStar|MirAncesTar|miranda_May_2021|miRcode|miRDB_v6|mirmap_May_2021|MiRNATIP|miRTar2GO|mirzag|PITA_May_2021|RNA22
MAP3K4	Q9Y6R4		hsa-miR-1184	0.622617	12	Very High	BCmicrO|bitargeting_May_2021|CoMeTa|Cupid|DIANA|MirAncesTar|miranda_May_2021|MiRNATIP|mirzag|PACCMIT|PITA_May_2021|RNA22
MAP3K4	Q9Y6R4		hsa-miR-761	0.59434	12	Very High	bitargeting_May_2021|Cupid|DIANA|MBStar|MirAncesTar|miranda_May_2021|miRcode|miRDB_v6|mirmap_May_2021|MiRNATIP|mirzag|RNA22
MAP3K4	Q9Y6R4		hsa-miR-624-3p	0.553914	13	Very High	bitargeting_May_2021|Cupid|DIANA|MBStar|MirAncesTar|miranda_May_2021|mirbase|miRDB_v6|mirmap_May_2021|MiRNATIP|MirSNPInTarget|mirzag|RNA22
MAP3K4	Q9Y6R4		hsa-miR-449c-5p	0.54241	11	Very High	bitargeting_May_2021|Cupid|DIANA|MirAncesTar|miranda_May_2021|miRcode|mirmap_May_2021|MiRNATIP|miRTar2GO|PITA_May_2021|RNA22
MAP3K4	Q9Y6R4		hsa-miR-103a-2-5p	0.519258	11	Very High	bitargeting_May_2021|Cupid|DIANA|MirAncesTar|miranda_May_2021|miRDB_v6|MiRNATIP|MirTar2|mirzag|PITA_May_2021|RNA22
MAP3K4	Q9Y6R4		hsa-miR-4768-3p	0.509589	10	Very High	DIANA|MBStar|MirAncesTar|miranda_May_2021|miRDB_v6|mirmap_May_2021|MiRNATIP|MirTar2|mirzag|RNA22
MAP3K4	Q9Y6R4		hsa-miR-5047	0.490857	10	Very High	bitargeting_May_2021|DIANA|MirAncesTar|miranda_May_2021|miRDB_v6|MiRNATIP|MirTar2|mirzag|PACCMIT|RNA22
MAP3K4	Q9Y6R4		hsa-miR-5197-5p	0.490311	8	Very High	DIANA|MirAncesTar|miranda_May_2021|miRDB_v6|MiRNATIP|MirTar2|mirzag|PACCMIT
MAP3K4	Q9Y6R4		hsa-miR-143-5p	0.449578	10	Very High	Cupid|DIANA|MBStar|MirAncesTar|miranda_May_2021|miRDB_v6|MiRNATIP|mirzag|PITA_May_2021|RNA22
MAP3K4	Q9Y6R4		hsa-miR-6073	0.304417	5	Very High	bitargeting_May_2021|MirAncesTar|miRDB_v6|MiRNATIP|RNA22
MAP3K4	Q9Y6R4		hsa-miR-7703	0.263566	6	Very High	MirAncesTar|miranda_May_2021|miRDB_v6|MiRNATIP|mirzag|RNA22
MAP3K4	Q9Y6R4		hsa-miR-151b	0.202461	6	Very High	DIANA|MBStar|MirAncesTar|miranda_May_2021|mirmap_May_2021|MiRNATIP
MAP3K4	Q9Y6R4		hsa-miR-103a-1-5p	0.194669	5	Very High	bitargeting_May_2021|miranda_May_2021|miRDB_v6|PITA_May_2021|RNA22
MAP3K4	Q9Y6R4		hsa-miR-6078	0.177464	6	Very High	bitargeting_May_2021|MBStar|MirAncesTar|MiRNATIP|mirzag|RNA22
MAP3K4	Q9Y6R4		hsa-miR-6717-5p	0.173973	7	Very High	bitargeting_May_2021|MirAncesTar|miranda_May_2021|MiRNATIP|mirzag|PITA_May_2021|RNA22

## Sheet: starbase DLAT
#please cite:
#Zhou KR, Liu S, Cai L, et al. ENCORI: The Encyclopedia of RNA Interactomes.
#2.Li JH, et al.starBase v2.0: decoding miRNA-ceRNA, miRNA-ncRNA and protein-RNA interaction networks from large-scale CLIP-Seq data , Nucleic Acids Res. 2014 Jan;42:D92-7.
miRNAid	miRNAname	geneID	geneName	geneType	chromosome	narrowStart	narrowEnd	broadStart	broadEnd	strand	clipExpNum	degraExpNum	RBP	PITA	RNA22	miRmap	microT	miRanda	PicTar	TargetScan	pancancerNum
MIMAT0000082	hsa-miR-26a-5p	ENSG00000150768	DLAT	protein_coding	chr11	111933897	111933903	111933883	111933904	+	1	0	AGO2	1	0	1	0	1	0	0	15
MIMAT0000082	hsa-miR-26a-5p	ENSG00000150768	DLAT	protein_coding	chr11	111933926	111933932	111933912	111933933	+	2	0	AGO2	1	0	1	0	1	0	0	15
MIMAT0000095	hsa-miR-96-5p	ENSG00000150768	DLAT	protein_coding	chr11	111934202	111934208	111934186	111934209	+	3	0	AGO1-4,AGO2	1	0	1	0	1	1	1	6
MIMAT0000259	hsa-miR-182-5p	ENSG00000150768	DLAT	protein_coding	chr11	111934203	111934208	111934186	111934209	+	3	0	AGO1-4,AGO2	1	0	1	0	1	1	0	1
MIMAT0000421	hsa-miR-122-5p	ENSG00000150768	DLAT	protein_coding	chr11	111934726	111934732	111934714	111934733	+	2	0	AGO2	0	0	1	0	1	0	1	3
MIMAT0000710	hsa-miR-365a-3p	ENSG00000150768	DLAT	protein_coding	chr11	111933401	111933407	111933380	111933408	+	14	0	AGO1,AGO1-4,AGO2,AGO3	1	0	1	1	1	0	1	13
MIMAT0000732	hsa-miR-378a-3p	ENSG00000150768	DLAT	protein_coding	chr11	111933379	111933384	111933365	111933385	+	6	0	AGO1,AGO1-4,AGO2	1	0	1	0	1	1	0	1
MIMAT0001075	hsa-miR-384	ENSG00000150768	DLAT	protein_coding	chr11	111933544	111933550	111933530	111933551	+	4	0	AGO1-4,AGO2	1	0	1	0	1	0	0	0
MIMAT0001339	hsa-miR-422a	ENSG00000150768	DLAT	protein_coding	chr11	111933379	111933384	111933364	111933385	+	6	0	AGO1,AGO1-4,AGO2	1	0	1	0	1	1	0	2
MIMAT0002859	hsa-miR-516b-5p	ENSG00000150768	DLAT	protein_coding	chr11	111933380	111933385	111933358	111933386	+	6	0	AGO1,AGO1-4,AGO2	1	0	1	1	0	0	0	1
MIMAT0003180	hsa-miR-487b-3p	ENSG00000150768	DLAT	protein_coding	chr11	111933553	111933559	111933539	111933560	+	4	0	AGO1-4,AGO2	1	0	1	0	1	0	0	6
MIMAT0004797	hsa-miR-582-3p	ENSG00000150768	DLAT	protein_coding	chr11	111933354	111933360	111933333	111933361	+	6	0	AGO1,AGO1-4,AGO2	1	0	1	1	0	0	0	2
MIMAT0005796	hsa-miR-1271-5p	ENSG00000150768	DLAT	protein_coding	chr11	111934202	111934208	111934188	111934209	+	3	0	AGO1-4,AGO2	1	0	1	0	1	1	1	8
MIMAT0022834	hsa-miR-365b-3p	ENSG00000150768	DLAT	protein_coding	chr11	111933401	111933407	111933380	111933408	+	14	0	AGO1,AGO1-4,AGO2,AGO3	0	0	1	1	0	0	1	13

## Sheet: starbase_IDH3B
#please cite:
#Zhou KR, Liu S, Cai L, et al. ENCORI: The Encyclopedia of RNA Interactomes.
#2.Li JH, et al.starBase v2.0: decoding miRNA-ceRNA, miRNA-ncRNA and protein-RNA interaction networks from large-scale CLIP-Seq data , Nucleic Acids Res. 2014 Jan;42:D92-7.
miRNAid	miRNAname	geneID	geneName	geneType	chromosome	narrowStart	narrowEnd	broadStart	broadEnd	strand	clipExpNum	degraExpNum	RBP	PITA	RNA22	miRmap	microT	miRanda	PicTar	TargetScan	pancancerNum
MIMAT0000072	hsa-miR-18a-5p	ENSG00000101365	IDH3B	protein_coding	chr20	2639289	2639294	2639289	2639294	-	2	0	AGO2	1	0	0	0	0	0	0	1
MIMAT0000089	hsa-miR-31-5p	ENSG00000101365	IDH3B	protein_coding	chr20	2639098	2639103	2639098	2639103	-	4	1	AGO1,AGO1-4,AGO2	1	0	1	0	0	0	0	6
MIMAT0000089	hsa-miR-31-5p	ENSG00000101365	IDH3B	protein_coding	chr20	2639132	2639137	2639132	2639137	-	4	0	AGO1-4,AGO2	1	0	1	0	0	0	0	6
MIMAT0000101	hsa-miR-103a-3p	ENSG00000101365	IDH3B	protein_coding	chr20	2639104	2639109	2639104	2639109	-	4	0	AGO1,AGO1-4,AGO2	1	0	0	0	0	0	0	0
MIMAT0000104	hsa-miR-107	ENSG00000101365	IDH3B	protein_coding	chr20	2639104	2639109	2639104	2639109	-	4	0	AGO1,AGO1-4,AGO2	1	0	0	0	0	0	0	2
MIMAT0000259	hsa-miR-182-5p	ENSG00000101365	IDH3B	protein_coding	chr20	2641451	2641476	2641451	2641476	-	2	0	AGO1-4	0	0	0	0	1	0	0	0
MIMAT0000261	hsa-miR-183-5p	ENSG00000101365	IDH3B	protein_coding	chr20	2639130	2639135	2639130	2639135	-	4	0	AGO1-4,AGO2	1	0	0	0	0	0	0	0
MIMAT0000274	hsa-miR-217	ENSG00000101365	IDH3B	protein_coding	chr20	2639339	2639344	2639339	2639344	-	2	0	AGO1,AGO2	1	0	0	0	0	0	0	5
MIMAT0000281	hsa-miR-224-5p	ENSG00000101365	IDH3B	protein_coding	chr20	2639125	2639130	2639125	2639130	-	5	0	AGO1,AGO1-4,AGO2	1	0	0	0	0	0	0	3
MIMAT0000421	hsa-miR-122-5p	ENSG00000101365	IDH3B	protein_coding	chr20	2639358	2639364	2639357	2639378	-	2	0	AGO1,AGO2	1	0	1	0	1	0	0	3
MIMAT0000422	hsa-miR-124-3p	ENSG00000101365	IDH3B	protein_coding	chr20	2639101	2639106	2639101	2639106	-	4	0	AGO1,AGO1-4,AGO2	1	0	0	0	0	0	0	1
MIMAT0000448	hsa-miR-136-5p	ENSG00000101365	IDH3B	protein_coding	chr20	2639206	2639211	2639206	2639211	-	1	0	AGO1	1	0	0	0	0	0	0	4
MIMAT0000687	hsa-miR-299-3p	ENSG00000101365	IDH3B	protein_coding	chr20	2639194	2639199	2639194	2639199	-	1	0	AGO1	1	0	0	0	0	0	0	2
MIMAT0000763	hsa-miR-338-3p	ENSG00000101365	IDH3B	protein_coding	chr20	2639284	2639289	2639284	2639289	-	2	0	AGO2	1	0	0	0	0	0	0	2
MIMAT0001412	hsa-miR-18b-5p	ENSG00000101365	IDH3B	protein_coding	chr20	2639289	2639294	2639289	2639294	-	2	0	AGO2	1	0	0	0	0	0	0	0
MIMAT0002806	hsa-miR-490-3p	ENSG00000101365	IDH3B	protein_coding	chr20	2639166	2639171	2639166	2639171	-	3	0	AGO1,AGO1-4	1	0	0	0	0	0	0	4
MIMAT0002807	hsa-miR-491-5p	ENSG00000101365	IDH3B	protein_coding	chr20	2639094	2639099	2639093	2639115	-	5	2	AGO1,AGO1-4,AGO2	1	0	0	0	1	0	0	3
MIMAT0002807	hsa-miR-491-5p	ENSG00000101365	IDH3B	protein_coding	chr20	2639171	2639176	2639171	2639176	-	3	0	AGO1,AGO1-4	1	0	0	0	0	0	0	3
MIMAT0002878	hsa-miR-506-3p	ENSG00000101365	IDH3B	protein_coding	chr20	2639101	2639106	2639101	2639106	-	4	0	AGO1,AGO1-4,AGO2	1	0	0	0	0	0	0	4
MIMAT0003165	hsa-miR-545-3p	ENSG00000101365	IDH3B	protein_coding	chr20	2639105	2639110	2639105	2639110	-	4	1	AGO1,AGO1-4,AGO2	1	0	0	0	0	0	0	1
MIMAT0003165	hsa-miR-545-3p	ENSG00000101365	IDH3B	protein_coding	chr20	2639285	2639290	2639285	2639290	-	2	0	AGO2	1	0	0	0	0	0	0	1
MIMAT0003320	hsa-miR-650	ENSG00000101365	IDH3B	protein_coding	chr20	2639697	2639718	2639697	2639718	-	1	0	AGO2	0	1	0	0	0	0	0	1
MIMAT0003330	hsa-miR-654-5p	ENSG00000101365	IDH3B	protein_coding	chr20	2639093	2639098	2639093	2639098	-	3	0	AGO1-4,AGO2	1	0	0	0	0	0	0	7
MIMAT0003338	hsa-miR-660-5p	ENSG00000101365	IDH3B	protein_coding	chr20	2639148	2639153	2639148	2639153	-	3	0	AGO1-4,AGO2	1	0	0	0	0	0	0	0
MIMAT0003393	hsa-miR-425-5p	ENSG00000101365	IDH3B	protein_coding	chr20	2639110	2639115	2639110	2639115	-	5	1	AGO1,AGO1-4,AGO2	1	0	0	0	0	0	0	2
MIMAT0004795	hsa-miR-574-5p	ENSG00000101365	IDH3B	protein_coding	chr20	2639359	2639365	2639359	2639365	-	2	0	AGO1,AGO2	1	0	0	0	0	0	0	0
MIMAT0004807	hsa-miR-624-3p	ENSG00000101365	IDH3B	protein_coding	chr20	2639318	2639324	2639318	2639324	-	2	2	AGO2	1	0	0	0	0	0	0	1
MIMAT0004920	hsa-miR-541-3p	ENSG00000101365	IDH3B	protein_coding	chr20	2639093	2639098	2639093	2639098	-	3	0	AGO1-4,AGO2	1	0	0	0	0	0	0	3
MIMAT0004949	hsa-miR-877-5p	ENSG00000101365	IDH3B	protein_coding	chr20	2639311	2639316	2639311	2639316	-	2	0	AGO2	1	0	0	0	0	0	0	2
MIMAT0005877	hsa-miR-1286	ENSG00000101365	IDH3B	protein_coding	chr20	2639689	2639711	2639689	2639711	-	1	0	AGO2	0	1	0	0	0	0	0	0
MIMAT0015023	hsa-miR-3150a-3p	ENSG00000101365	IDH3B	protein_coding	chr20	2639355	2639361	2639355	2639361	-	2	2	AGO1,AGO2	0	0	1	0	0	0	0	2
MIMAT0018192	hsa-miR-3918	ENSG00000101365	IDH3B	protein_coding	chr20	2639082	2639088	2639082	2639088	-	2	0	AGO1-4,AGO2	0	0	1	0	0	0	0	0
MIMAT0018192	hsa-miR-3918	ENSG00000101365	IDH3B	protein_coding	chr20	2639685	2639704	2639685	2639704	-	1	0	AGO2	0	1	0	0	0	0	0	0
MIMAT0018937	hsa-miR-378g	ENSG00000101365	IDH3B	protein_coding	chr20	2639201	2639207	2639201	2639207	-	1	1	AGO1	0	0	1	0	0	0	0	1
MIMAT0021020	hsa-miR-5000-3p	ENSG00000101365	IDH3B	protein_coding	chr20	2639690	2639712	2639690	2639712	-	1	0	AGO2	0	1	0	0	0	0	0	1

## Sheet: starbase_MAP3K4
#please cite:
#Zhou KR, Liu S, Cai L, et al. ENCORI: The Encyclopedia of RNA Interactomes.
#2.Li JH, et al.starBase v2.0: decoding miRNA-ceRNA, miRNA-ncRNA and protein-RNA interaction networks from large-scale CLIP-Seq data , Nucleic Acids Res. 2014 Jan;42:D92-7.
miRNAid	miRNAname	geneID	geneName	geneType	chromosome	narrowStart	narrowEnd	broadStart	broadEnd	strand	clipExpNum	degraExpNum	RBP	PITA	RNA22	miRmap	microT	miRanda	PicTar	TargetScan	pancancerNum
MIMAT0000068	hsa-miR-15a-5p	ENSG00000085511	MAP3K4	protein_coding	chr6	161538045	161538051	161538024	161538052	+	5	0	AGO1,AGO2	1	0	0	1	1	1	1	5
MIMAT0000069	hsa-miR-16-5p	ENSG00000085511	MAP3K4	protein_coding	chr6	161538045	161538051	161538024	161538052	+	5	0	AGO1,AGO2	1	0	0	1	1	1	1	7
MIMAT0000084	hsa-miR-27a-3p	ENSG00000085511	MAP3K4	protein_coding	chr6	161538293	161538299	161538272	161538300	+	6	0	AGO1,AGO1-4,AGO2	1	0	0	1	1	0	1	8
MIMAT0000099	hsa-miR-101-3p	ENSG00000085511	MAP3K4	protein_coding	chr6	161537943	161537948	161537921	161537949	+	9	0	AGO2	1	0	0	1	1	1	1	3
MIMAT0000099	hsa-miR-101-3p	ENSG00000085511	MAP3K4	protein_coding	chr6	161538134	161538139	161538112	161538140	+	2	0	AGO2	1	0	0	1	0	1	1	3
MIMAT0000232	hsa-miR-199a-3p	ENSG00000085511	MAP3K4	protein_coding	chr6	161537941	161537947	161537920	161537948	+	9	0	AGO2	1	0	1	1	0	1	1	7
MIMAT0000232	hsa-miR-199a-3p	ENSG00000085511	MAP3K4	protein_coding	chr6	161538132	161538138	161538111	161538139	+	1	0	AGO2	1	0	1	1	0	1	1	7
MIMAT0000243	hsa-miR-148a-3p	ENSG00000085511	MAP3K4	protein_coding	chr6	161538286	161538292	161538265	161538293	+	6	0	AGO1,AGO1-4,AGO2	1	0	1	1	1	0	1	15
MIMAT0000261	hsa-miR-183-5p	ENSG00000085511	MAP3K4	protein_coding	chr6	161538124	161538130	161538103	161538131	+	1	0	AGO2	1	0	1	1	1	1	1	6
MIMAT0000271	hsa-miR-214-3p	ENSG00000085511	MAP3K4	protein_coding	chr6	161538043	161538049	161538022	161538050	+	5	0	AGO1,AGO2	1	0	1	1	1	0	0	3
MIMAT0000417	hsa-miR-15b-5p	ENSG00000085511	MAP3K4	protein_coding	chr6	161538045	161538048	161538024	161538052	+	5	0	AGO1,AGO2	1	0	0	1	1	2	1	4
MIMAT0000419	hsa-miR-27b-3p	ENSG00000085511	MAP3K4	protein_coding	chr6	161538293	161538299	161538272	161538300	+	6	0	AGO1,AGO1-4,AGO2	1	0	0	1	1	0	1	6
MIMAT0000424	hsa-miR-128-3p	ENSG00000085511	MAP3K4	protein_coding	chr6	161538293	161538298	161538271	161538299	+	6	0	AGO1,AGO1-4,AGO2	1	0	1	1	1	0	1	0
MIMAT0000436	hsa-miR-144-3p	ENSG00000085511	MAP3K4	protein_coding	chr6	161537943	161537948	161537921	161537949	+	9	0	AGO2	1	0	0	1	1	1	1	4
MIMAT0000436	hsa-miR-144-3p	ENSG00000085511	MAP3K4	protein_coding	chr6	161538134	161538139	161538112	161538140	+	2	0	AGO2	1	0	0	1	0	1	1	4
MIMAT0000438	hsa-miR-152-3p	ENSG00000085511	MAP3K4	protein_coding	chr6	161538286	161538292	161538265	161538293	+	6	0	AGO1,AGO1-4,AGO2	1	0	1	1	1	0	1	8
MIMAT0000461	hsa-miR-195-5p	ENSG00000085511	MAP3K4	protein_coding	chr6	161538045	161538051	161538024	161538052	+	5	0	AGO1,AGO2	1	0	0	1	1	1	1	4
MIMAT0000759	hsa-miR-148b-3p	ENSG00000085511	MAP3K4	protein_coding	chr6	161538286	161538292	161538265	161538293	+	6	0	AGO1,AGO1-4,AGO2	1	0	1	1	1	0	1	10
MIMAT0001341	hsa-miR-424-5p	ENSG00000085511	MAP3K4	protein_coding	chr6	161538045	161538051	161538024	161538052	+	5	0	AGO1,AGO2	1	0	0	1	1	1	1	11
MIMAT0002817	hsa-miR-495-3p	ENSG00000085511	MAP3K4	protein_coding	chr6	161538275	161538282	161538255	161538283	+	6	0	AGO1,AGO1-4,AGO2	1	0	0	1	1	0	0	2
MIMAT0002820	hsa-miR-497-5p	ENSG00000085511	MAP3K4	protein_coding	chr6	161538046	161538048	161538024	161538052	+	5	0	AGO1,AGO2	1	0	0	1	1	2	1	2
MIMAT0004563	hsa-miR-199b-3p	ENSG00000085511	MAP3K4	protein_coding	chr6	161537941	161537947	161537920	161537948	+	9	0	AGO2	1	0	1	1	0	1	1	7
MIMAT0004563	hsa-miR-199b-3p	ENSG00000085511	MAP3K4	protein_coding	chr6	161538132	161538138	161538111	161538139	+	1	0	AGO2	1	0	1	1	0	1	1	7
MIMAT0004807	hsa-miR-624-3p	ENSG00000085511	MAP3K4	protein_coding	chr6	161538257	161538263	161538236	161538264	+	5	0	AGO1-4,AGO2	1	0	1	1	0	0	0	0
MIMAT0005797	hsa-miR-1301-3p	ENSG00000085511	MAP3K4	protein_coding	chr6	161538329	161538335	161538308	161538336	+	5	0	AGO1,AGO1-4,AGO2	1	0	1	1	0	0	0	11
MIMAT0014992	hsa-miR-3129-5p	ENSG00000085511	MAP3K4	protein_coding	chr6	161537941	161537947	161537920	161537948	+	9	0	AGO2	0	0	1	1	0	1	1	1
MIMAT0014992	hsa-miR-3129-5p	ENSG00000085511	MAP3K4	protein_coding	chr6	161538132	161538138	161538111	161538139	+	1	0	AGO2	0	0	1	1	0	1	1	1
