# Supplementary material for: A Multi-Omics Analysis of NASH-Related Prognostic Biomarkers Associated with Drug Sensitivity and Immune Infiltration in Hepatocellular Carcinoma
Source: J Clin Med. 2023 Feb 6;12(4):1286. doi: 10.3390/jcm12041286 (PMC9963320; doi:10.3390/jcm12041286)
Supplement: Supplementary file 1 [file jcm-12-01286-s001.zip › Table S4.xlsx]

## Sheet: hsa-miR-148a-3p
#please cite:
MIMAT0000243	hsa-miR-148a-3p	ENSG00000230699	AL645608.3	lincRNA	chr1	848683	848706	+	2	0	AGO2	8mer	uguuucAAGAC-AUC-ACGUGACu	| ||| |:| |||||||	cugcccUGCUGCUGGCUGCACUGa	9
MIMAT0000243	hsa-miR-148a-3p	ENSG00000272040	AC010245.2	lincRNA	chr5	74904858	74904880	+	2	0	AGO1-4	7mer-m8	ugUUUCAAG-ACAUCACGUGACu	||: ||| || |||||||	cuAAGUUUCACAUAAUGCACUGc	9
MIMAT0000243	hsa-miR-148a-3p	ENSG00000281398	SNHG4	lincRNA	chr5	138615685	138615705	+	2	0	AGO1-4	7mer-m8	ugUUUCAAGACAUCACGUGACu	||||||: || |||||||	agAAAGUUUAUUA-UGCACUGc	6
MIMAT0000243	hsa-miR-148a-3p	ENSG00000249859	PVT1	lincRNA	chr8	128902970	128902991	+	2	0	AGO1-4,AGO2	7mer-m8	uguuucaagacaucACGUGACu	|||||||	cgcugguggaaccaUGCACUGg	7
MIMAT0000243	hsa-miR-148a-3p	ENSG00000245532	NEAT1	lincRNA	chr11	65194639	65194661	+	13	0	AGO1-4	7mer-m8	uguuuCAAGACA-UCACGUGACu	||||||| |||||||	ggacuGUUCUGUCCUUGCACUGc	9
MIMAT0000243	hsa-miR-148a-3p	ENSG00000245532	NEAT1	lincRNA	chr11	65196238	65196262	+	5	0	AGO1-4,AGO2	7mer-m8	uguUUCAAGACAUC---ACGUGACu	|:| || || |||||||	uccAGGACCUCCAGCCCUGCACUGc	9
MIMAT0000243	hsa-miR-148a-3p	ENSG00000245532	NEAT1	lincRNA	chr11	65201988	65202009	+	8	0	AGO1-4	7mer-m8	uguuucaagacaucACGUGACu	|||||||	uuguuuucaacuucUGCACUGu	9
MIMAT0000243	hsa-miR-148a-3p	ENSG00000245532	NEAT1	lincRNA	chr11	65204089	65204110	+	11	0	AGO1-4	7mer-m8	uguuucaaGACAUCACGUGACu	|||| |||||||	cacacagcCUGUCUUGCACUGu	9
MIMAT0000243	hsa-miR-148a-3p	ENSG00000245532	NEAT1	lincRNA	chr11	65208691	65208716	+	7	0	AGO1-4	7mer-m8	uguUUCAAGACAU----CACGUGACu	|||||| | |||||||	gacAAGUUCCCAACCCUCUGCACUGc	9
MIMAT0000243	hsa-miR-148a-3p	ENSG00000245532	NEAT1	lincRNA	chr11	65210838	65210859	+	13	0	AGO1-4	7mer-m8	uguuucAAG-ACAUCACGUGACu	||| ||| |||||||	gcugucUUCUUGU-UUGCACUGg	9
MIMAT0000243	hsa-miR-148a-3p	ENSG00000212694	LINC01089	lincRNA	chr12	122233246	122233267	-	6	0	AGO1-4,AGO2	7mer-m8	uguuucaaGACAUCACGUGACu	|| | |||||||	cuuccaacCUCCAUUGCACUGc	6
MIMAT0000243	hsa-miR-148a-3p	ENSG00000259527	LINC00052	lincRNA	chr15	88122042	88122063	+	2	0	AGO1-4	7mer-m8	uguUUCA-AGACAUCACGUGACu	|||| | || |||||||	uucAAGUAAAUAUA-UGCACUGg	6
MIMAT0000243	hsa-miR-148a-3p	ENSG00000276728	AC142472.1	lincRNA	chr17	43224344	43224365	-	2	0	AGO1-4	7mer-m8	uguuucaagacaucACGUGACu	|||||||	cauuccagcacguuUGCACUGu	6
MIMAT0000243	hsa-miR-148a-3p	ENSG00000263753	LINC00667	lincRNA	chr18	5238674	5238698	+	3	0	AGO2	7mer-m8	uguUUCAAGACAU---CACGUGACu	|| ||| |: |||||||	gccAAUCUCUAUGCCUUUGCACUGc	6
MIMAT0000243	hsa-miR-148a-3p	ENSG00000268362	AC092279.1	lincRNA	chr19	24249214	24249237	+	2	0	AGO1-4	8mer	ugUUUCAAGACAU--CACGUGACu	| | | ||| : |||||||	acAUAUUGCUGGGCCCUGCACUGa	5
MIMAT0000243	hsa-miR-148a-3p	ENSG00000267152	AC093227.1	lincRNA	chr19	38221525	38221544	-	2	0	AGO1-4	7mer-m8	uguUUCAAGACAUCACGUGACu	||| | || ||||||||	#NAME?	6
MIMAT0000243	hsa-miR-148a-3p	ENSG00000229807	XIST	lincRNA	chrX	73070493	73070514	-	6	0	AGO2	7mer-m8	uguuucaaGACAUCACGUGACu	||| | |||||||	ggucugccCUGCACUGCACUGu	1

## Sheet: hsa-miR-491-5p
#please cite:
MIMAT0002807	hsa-miR-491-5p	ENSG00000273329	AC078846.1	lincRNA	chr7	129247198	129247222	-	2	0	AGO1-4	8mer	ggAGU-ACCUUCCCA--AGGGGUGa	||| || | || |||||||	ugUCAUUGCACAUGUACUCCCCACa	5
MIMAT0002807	hsa-miR-491-5p	ENSG00000273329	AC078846.1	lincRNA	chr7	129248458	129248480	-	1	0	AGO1-4	8mer	ggaguaccUUCCCA-AGGGGUGa	|||||| |||||||	guuuccacAAGGGUCUCCCCACa	5
MIMAT0002807	hsa-miR-491-5p	ENSG00000261334	AL353803.4	lincRNA	chr9	132243176	132243197	-	3	0	AGO1-4,AGO2	7mer-m8	ggaguaccuucccaAGGGGUGa	|||||||	ccacaucucaccugUCCCCACc	0
MIMAT0002807	hsa-miR-491-5p	ENSG00000245532	NEAT1	lincRNA	chr11	65200306	65200327	+	6	0	AGO1-4	7mer-m8	ggaguaccuucccaAGGGGUGa	|||||||	ccccccucuuacccUCCCCACu	5
MIMAT0002807	hsa-miR-491-5p	ENSG00000245532	NEAT1	lincRNA	chr11	65204418	65204438	+	7	0	AGO1-4	8mer	ggaGUACCUUCCCAAGGGGUGa	||| | | ||||||||	uccCAUUG-ACAUUUCCCCACa	5
MIMAT0002807	hsa-miR-491-5p	ENSG00000245532	NEAT1	lincRNA	chr11	65211654	65211675	+	12	0	AGO1-4	7mer-m8	ggaguaccuucccAAGGGGUGa	||||||||	uuggcccaacacaUUCCCCACc	5
MIMAT0002807	hsa-miR-491-5p	ENSG00000251562	MALAT1	lincRNA	chr11	65272991	65273012	+	25	0	AGO1-4,AGO2	8mer	ggagUACCUUCCCAAGGGGUGa	| | |||| |||||||	uuaaAAGCAAGGUCUCCCCACa	4
MIMAT0002807	hsa-miR-491-5p	ENSG00000250742	LINC02381	lincRNA	chr12	54520192	54520213	+	2	0	AGO2	7mer-m8	ggAGU-ACCUUCCCAAGGGGUGa	||: || ||| |||||||	gaUCGCUGCUCGGG-UCCCCACu	4
MIMAT0002807	hsa-miR-491-5p	ENSG00000260973	AC009021.2	lincRNA	chr16	22623043	22623068	-	3	0	AGO1-4	7mer-m8	ggAGUACCUUCC----CAAGGGGUGa	|||||||:|| |||||||||	agUCAUGGAGGGACACGUUCCCCACu	1
MIMAT0002807	hsa-miR-491-5p	ENSG00000278041	AL133325.3	lincRNA	chr20	21480676	21480697	-	2	0	AGO2	7mer-m8	ggaguaccuucCCAAGGGGUGa	| ||||||||	ucucugagcccGUUUCCCCACu	4
MIMAT0002807	hsa-miR-491-5p	ENSG00000197182	MIRLET7BHG	lincRNA	chr22	46501816	46501837	+	1	0	AGO1-4	7mer-m8	ggaguaccuucccaAGGGGUGa	|||||||	auucuuuccugcccUCCCCACc	9
MIMAT0002807	hsa-miR-491-5p	ENSG00000197182	MIRLET7BHG	lincRNA	chr22	46506799	46506820	+	2	0	AGO1-4	7mer-m8	ggaguaccuuccCAAGGGGUGa	| |||||||	cggggcccuccuGGUCCCCACu	9
MIMAT0002807	hsa-miR-491-5p	ENSG00000229807	XIST	lincRNA	chrX	73066504	73066525	-	9	1	AGO1-4,AGO2	7mer-m8	ggaguaccuucccaAGGGGUGa	|||||||	aagugcuccccucaUCCCCACu	0
MIMAT0002807	hsa-miR-491-5p	ENSG00000229807	XIST	lincRNA	chrX	73070546	73070567	-	6	0	AGO2	7mer-m8	ggaguaccuucccaAGGGGUGa	|||||||	ccccaccccccaccUCCCCACc	0
MIMAT0002807	hsa-miR-491-5p	ENSG00000229807	XIST	lincRNA	chrX	73070574	73070595	-	6	0	AGO2	7mer-m8	ggaguaccuucccaAGGGGUGa	|||||||	ccaacccccccaacUCCCCACc	0

## Sheet: hsa-miR-582-3p
#please cite:
MIMAT0004797	hsa-miR-582-3p	ENSG00000272086	AC025181.2	lincRNA	chr5	32174975	32174992	+	1	0	AGO2	7mer-m8	ccaaGUCAACAAGUUGGUCAAu	|||||| |||||||	agaaCAGUUG----ACCAGUUu	5
MIMAT0004797	hsa-miR-582-3p	ENSG00000251026	LINC02163	lincRNA	chr5	103416664	103416685	+	1	0	AGO1-4	7mer-m8	ccaagucaacaaguUGGUCAAu	|||||||	guguacugaauaguACCAGUUu	3
MIMAT0004797	hsa-miR-582-3p	ENSG00000245060	LINC00847	lincRNA	chr5	180261730	180261752	+	1	0	AGO1-4	8mer	ccAAG-UCAACAAGUUGGUCAAu	||| :|| | |: |||||||	ucUUCUGGUGGGUUUACCAGUUa	14
MIMAT0004797	hsa-miR-582-3p	ENSG00000244041	LINC01011	lincRNA	chr6	2990689	2990710	+	2	0	AGO1-4	7mer-m8	ccaAGUCAACAAGU-UGGUCAAu	||| || ||:: |||||||	cagUCA-UUCUUUGCACCAGUUc	11
MIMAT0004797	hsa-miR-582-3p	ENSG00000273038	AL365203.2	lincRNA	chr10	33177384	33177401	-	1	0	AGO1-4	7mer-m8	ccAAGUCAACAAGUUGGUCAAu	| |||||| |||||||	caUACAGUUG----ACCAGUUc	4
MIMAT0004797	hsa-miR-582-3p	ENSG00000245532	NEAT1	lincRNA	chr11	65192748	65192768	+	15	0	AGO1-4,AGO2	7mer-m8	ccaagucaacaAGUUGGUCAAu	|| |||||||	gugacacagagUC-ACCAGUUu	6
MIMAT0004797	hsa-miR-582-3p	ENSG00000245532	NEAT1	lincRNA	chr11	65201794	65201812	+	8	0	AGO1-4	7mer-m8	ccaaGUCAACAAGUUGGUCAAu	||| |||| |||||||	uaacCAG-UGUU--ACCAGUUu	6
MIMAT0004797	hsa-miR-582-3p	ENSG00000269939	PCF11-AS1	lincRNA	chr11	82897764	82897783	-	2	0	AGO1-4	7mer-m8	ccAAGUCAACAAGUUGGUCAAu	| || | | | |||||||	aaUCCAAUGG--CUACCAGUUu	0
MIMAT0004797	hsa-miR-582-3p	ENSG00000274281	AC022929.2	lincRNA	chr15	39144500	39144522	-	1	0	AGO1-4	8mer	ccaagucaacAAGU-UGGUCAAu	|||| |||||||	gagauaccauUUCACACCAGUUa	6
MIMAT0004797	hsa-miR-582-3p	ENSG00000277152	AC110048.2	lincRNA	chr15	67154409	67154430	+	2	0	AGO1-4,AGO2	8mer	ccaagucaacaaguUGGUCAAu	|||||||	agggacuuaccuacACCAGUUa	5
MIMAT0004797	hsa-miR-582-3p	ENSG00000268333	AL132655.1	lincRNA	chr20	57411566	57411584	-	1	0	AGO2	7mer-m8	ccaagUCAACAAGUUGGUCAAu	:| | | ||||||||	#NAME?	6

## Sheet: hsa-miR-1271-5p
#please cite:
MIMAT0005796	hsa-miR-1271-5p	ENSG00000228526	MIR34AHG	lincRNA	chr1	9208500	9208521	-	2	0	AGO1,AGO2	7mer-m8	acuCACGAACGAUCCACGGUUc	|| : || |||||||	acuGUCUAUGGAUUGUGCCAAu	3
MIMAT0005796	hsa-miR-1271-5p	ENSG00000281649	EBLN3P	lincRNA	chr9	37087218	37087239	+	3	0	AGO1-4,AGO2	7mer-m8	acucacgaacgaucCACGGUUc	|||||||	aacacauggugauuGUGCCAAc	8
MIMAT0005796	hsa-miR-1271-5p	ENSG00000269929	AL158152.1	lincRNA	chr9	96939807	96939829	+	3	0	AGO1-4	8mer	acucAC-GAACGAUCCACGGUUc	|| ||| : | |||||||	uuguUGCCUUUUGAUGUGCCAAa	5
MIMAT0005796	hsa-miR-1271-5p	ENSG00000242375	AL590705.3	lincRNA	chr9	99957776	99957798	-	4	0	AGO2	7mer-m8	acucacGAACGAUC--CACGGUUc	|||| || |||||||	gguuccCUUG-AAGCAGUGCCAAc	2
MIMAT0005796	hsa-miR-1271-5p		MALAT1	lincRNA	chr11	65268189	65268211	+	25	3	AGO1-4,AGO2	7mer-m8	acucaCGAACGAUC-CACGGUUc	|| ||| || |||||||	gaccaGCAUGCCAGUGUGCCAAg	5
MIMAT0005796	hsa-miR-1271-5p	ENSG00000251562	MALAT1	lincRNA	chr11	65270550	65270571	+	24	0	AGO1-4,AGO2	7mer-m8	acUCACGA-ACGAUCCACGGUUc	|| ||| ||||: |||||||	ggAG-GCUGUGCUGUGUGCCAAu	5
MIMAT0005796	hsa-miR-1271-5p	ENSG00000272301	AP002360.3	lincRNA	chr11	76100838	76100860	+	2	0	AGO1-4,AGO2	7mer-m8	acUCA-CGAACGAUCCACGGUUc	||| |||| | | |||||||	gcAGUGGCUUUCGAUGUGCCAAg	1
MIMAT0005796	hsa-miR-1271-5p	ENSG00000250742	LINC02381	lincRNA	chr12	54526497	54526518	+	17	0	AGO1,AGO1-4,AGO2,AGO3	7mer-m8	acUCACGAACGAUCCACGGUUc	||| | | :| |||||||	cuAGUACCUAUUCUGUGCCAAg	4
MIMAT0005796	hsa-miR-1271-5p	ENSG00000234608	MAPKAPK5-AS1	lincRNA	chr12	112279264	112279285	-	5	0	AGO1,AGO1-4,AGO2,AGO3	8mer	acucacgaacgAUCCACGGUUc	|| |||||||	uugcacaucagUAUGUGCCAAa	4
MIMAT0005796	hsa-miR-1271-5p	ENSG00000274292	AC084018.2	lincRNA	chr12	122238984	122239008	+	2	0	AGO1-4	7mer-m8	acUC-ACGA-ACGAU-CCACGGUUc	|| |||| |: | ||||||||	ggAGAUGCUGCGUCAUGGUGCCAAc	6
MIMAT0005796	hsa-miR-1271-5p	ENSG00000246548	LINC02288	lincRNA	chr14	77534159	77534180	+	2	0	AGO1-4	7mer-m8	acucacgaaCGAUCCACGGUUc	|| : |||||||	auggauuggGCAGUGUGCCAAg	0
MIMAT0005796	hsa-miR-1271-5p	ENSG00000259495	AC016705.2	lincRNA	chr15	80666531	80666552	-	2	0	AGO2	7mer-m8	acucacgaacgaucCACGGUUc	|||||||	cuacauauuaaauuGUGCCAAu	5
MIMAT0005796	hsa-miR-1271-5p	ENSG00000261194	LINC01898	lincRNA	chr18	73424041	73424060	-	2	0	AGO2	7mer-m8	acUCACGAACGAUCCACGGUUc	| ||| | || |||||||	caAAUGCAUCCU--GUGCCAAc	1
MIMAT0005796	hsa-miR-1271-5p	ENSG00000229807	XIST	lincRNA	chrX	73042315	73042336	-	5	0	AGO2	7mer-m8	acucacgaacgaUCCACGGUUc	:||||||||	acaaauauauucGGGUGCCAAu	2
MIMAT0005796	hsa-miR-1271-5p	ENSG00000229807	XIST	lincRNA	chrX	73044045	73044067	-	4	0	AGO2	7mer-m8	acUCACGA-ACGAUCCACGGUUc	||| | | :|: |||||||	guAGUUAUCUAUUGUGUGCCAAu	2
MIMAT0005796	hsa-miR-1271-5p	ENSG00000229807	XIST	lincRNA	chrX	73045808	73045832	-	7	0	AGO2	7mer-m8	acucacGAACGAUC---CACGGUUc	:||| |:| |||||||	aaauaaUUUGGUGGACUGUGCCAAc	2
MIMAT0005796	hsa-miR-1271-5p	ENSG00000229807	XIST	lincRNA	chrX	73062055	73062076	-	12	0	AGO1,AGO2,AGO3	8mer	acuCACGAACGAUCCACGGUUc	|| |||: | |||||||	auuGUUAUUGUAAAGUGCCAAa	2
