# Supplementary material for: A Multi-Omics Analysis of NASH-Related Prognostic Biomarkers Associated with Drug Sensitivity and Immune Infiltration in Hepatocellular Carcinoma
Source: J Clin Med. 2023 Feb 6;12(4):1286. doi: 10.3390/jcm12041286 (PMC9963320; doi:10.3390/jcm12041286)
Supplement: Supplementary file 1 [file jcm-12-01286-s001.zip › Table S5.xlsx]

## Sheet: SNV
cancertype	symbol	EffectiveMut	NonEffectiveMut	sample_size	percentage	entrez
ACC	MAP3K4	1	1	92	1.08696	4216
BLCA	DLAT	6	0	411	1.45985	1737
BLCA	IDH3B	3	5	411	0.729927	3420
BLCA	MAP3K4	19	6	411	4.62287	4216
BRCA	DLAT	2	1	1026	0.194932	1737
BRCA	IDH3B	3	3	1026	0.292398	3420
BRCA	MAP3K4	16	6	1026	1.55945	4216
CESC	DLAT	3	2	291	1.03093	1737
CESC	IDH3B	1	1	291	0.343643	3420
CESC	MAP3K4	9	6	291	3.09278	4216
CHOL	DLAT	0	1	36	0	1737
COAD	DLAT	5	0	407	1.2285	1737
COAD	IDH3B	1	3	407	0.2457	3420
COAD	MAP3K4	32	6	407	7.86241	4216
DLBC	IDH3B	1	0	37	2.7027	3420
DLBC	MAP3K4	0	1	37	0	4216
ESCA	IDH3B	2	1	185	1.08108	3420
ESCA	MAP3K4	1	4	185	0.540541	4216
GBM	DLAT	2	2	403	0.496278	1737
GBM	IDH3B	0	2	403	0	3420
GBM	MAP3K4	4	1	403	0.992556	4216
HNSC	DLAT	4	2	509	0.785855	1737
HNSC	IDH3B	1	3	509	0.196464	3420
HNSC	MAP3K4	11	0	509	2.1611	4216
KIRC	DLAT	1	1	370	0.27027	1737
KIRC	IDH3B	1	0	370	0.27027	3420
KIRC	MAP3K4	7	3	370	1.89189	4216
KIRP	DLAT	1	3	282	0.35461	1737
KIRP	IDH3B	0	1	282	0	3420
KIRP	MAP3K4	3	0	282	1.06383	4216
LGG	IDH3B	1	0	526	0.190114	3420
LGG	MAP3K4	4	3	526	0.760456	4216
LIHC	DLAT	0	1	365	0	1737
LIHC	IDH3B	1	0	365	0.273973	3420
LIHC	MAP3K4	7	3	365	1.91781	4216
LUAD	DLAT	7	3	567	1.23457	1737
LUAD	IDH3B	4	3	567	0.705467	3420
LUAD	MAP3K4	20	3	567	3.52734	4216
LUSC	DLAT	6	2	485	1.23711	1737
LUSC	IDH3B	4	3	485	0.824742	3420
LUSC	MAP3K4	9	8	485	1.85567	4216
MESO	MAP3K4	1	0	82	1.21951	4216
OV	DLAT	1	0	412	0.242718	1737
OV	IDH3B	0	1	412	0	3420
OV	MAP3K4	3	1	412	0.728155	4216
PAAD	DLAT	1	0	178	0.561798	1737
PAAD	IDH3B	0	1	178	0	3420
PAAD	MAP3K4	1	2	178	0.561798	4216
PCPG	DLAT	1	0	184	0.543478	1737
PCPG	MAP3K4	1	0	184	0.543478	4216
PRAD	DLAT	1	0	498	0.200803	1737
PRAD	IDH3B	0	1	498	0	3420
PRAD	MAP3K4	2	0	498	0.401606	4216
READ	DLAT	3	1	149	2.01342	1737
READ	MAP3K4	5	4	149	3.3557	4216
SARC	DLAT	1	0	239	0.41841	1737
SARC	IDH3B	1	1	239	0.41841	3420
SARC	MAP3K4	0	1	239	0	4216
SKCM	DLAT	10	10	468	2.13675	1737
SKCM	IDH3B	3	12	468	0.641026	3420
SKCM	MAP3K4	40	11	468	8.54701	4216
STAD	DLAT	8	0	439	1.82232	1737
STAD	IDH3B	2	8	439	0.455581	3420
STAD	MAP3K4	20	3	439	4.55581	4216
TGCT	MAP3K4	0	1	151	0	4216
THCA	MAP3K4	1	0	500	0.2	4216
THYM	IDH3B	0	1	123	0	3420
THYM	MAP3K4	1	0	123	0.813008	4216
UCEC	DLAT	14	10	531	2.63653	1737
UCEC	IDH3B	9	10	531	1.69492	3420
UCEC	MAP3K4	54	17	531	10.1695	4216
UCS	IDH3B	0	1	57	0	3420
UCS	MAP3K4	4	1	57	7.01754	4216

## Sheet: CNV
cancertype	symbol	a_total	d_total	a_hete	d_hete	a_homo	d_homo	entrez
ACC	DLAT	5.55556	31.1111	5.55556	31.1111	0	0	1737
ACC	IDH3B	51.1111	15.5556	51.1111	14.4444	0	1.11111	3420
ACC	MAP3K4	20	21.1111	16.6667	21.1111	3.33333	0	4216
BLCA	DLAT	10.5392	37.5	10.2941	36.7647	0.245098	0.735294	1737
BLCA	IDH3B	48.2843	9.06863	48.0392	9.06863	0.245098	0	3420
BLCA	MAP3K4	9.06863	46.3235	9.06863	45.098	0	1.22549	4216
BRCA	DLAT	8.7037	50.2778	8.42593	48.7963	0.277778	1.48148	1737
BRCA	IDH3B	34.9074	13.7963	34.2593	13.5185	0.648148	0.277778	3420
BRCA	MAP3K4	12.5926	33.7963	11.9444	32.7778	0.648148	1.01852	4216
CESC	DLAT	2.37288	53.5593	2.37288	49.1525	0	4.40678	1737
CESC	IDH3B	34.2373	9.15254	33.8983	8.81356	0.338983	0.338983	3420
CESC	MAP3K4	7.45763	33.2203	7.45763	30.8475	0	2.37288	4216
CHOL	DLAT	8.33333	33.3333	8.33333	33.3333	0	0	1737
CHOL	IDH3B	27.7778	16.6667	27.7778	16.6667	0	0	3420
CHOL	MAP3K4	5.55556	69.4444	5.55556	69.4444	0	0	4216
COAD	DLAT	12.1951	15.7428	11.9734	15.5211	0.22173	0.22173	1737
COAD	IDH3B	44.3459	18.847	43.459	18.6253	0.886918	0.22173	3420
COAD	MAP3K4	15.7428	12.1951	15.0776	11.7517	0.665188	0.443459	4216
DLBC	DLAT	33.3333	4.16667	33.3333	2.08333	0	2.08333	1737
DLBC	IDH3B	10.4167	2.08333	10.4167	2.08333	0	0	3420
DLBC	MAP3K4	8.33333	18.75	8.33333	14.5833	0	4.16667	4216
ESCA	DLAT	15.2174	40.7609	14.1304	39.1304	1.08696	1.63043	1737
ESCA	IDH3B	53.8043	14.6739	51.6304	14.6739	2.17391	0	3420
ESCA	MAP3K4	19.5652	27.1739	17.9348	27.1739	1.63043	0	4216
GBM	DLAT	3.29289	15.5979	2.77296	15.5979	0.519931	0	1737
GBM	IDH3B	39.1681	3.11958	39.1681	3.11958	0	0	3420
GBM	MAP3K4	4.15945	28.7695	4.15945	27.7296	0	1.03986	4216
HNSC	DLAT	10.728	47.1264	10.728	45.4023	0	1.72414	1737
HNSC	IDH3B	35.249	11.1111	34.8659	10.9195	0.383142	0.191571	3420
HNSC	MAP3K4	12.4521	17.0498	12.4521	16.4751	0	0.574713	4216
KICH	DLAT	25.7576	13.6364	24.2424	13.6364	1.51515	0	1737
KICH	IDH3B	31.8182	7.57576	30.303	7.57576	1.51515	0	3420
KICH	MAP3K4	1.51515	77.2727	1.51515	77.2727	0	0	4216
KIRC	DLAT	5.49242	5.68182	5.30303	5.49242	0.189394	0.189394	1737
KIRC	IDH3B	21.2121	1.70455	21.0227	1.70455	0.189394	0	3420
KIRC	MAP3K4	1.51515	28.5985	1.51515	28.4091	0	0.189394	4216
KIRP	DLAT	3.125	10.7639	3.125	9.02778	0	1.73611	1737
KIRP	IDH3B	34.0278	1.04167	33.6806	0.694444	0.347222	0.347222	3420
KIRP	MAP3K4	2.08333	10.7639	2.08333	10.4167	0	0.347222	4216
LAML	DLAT	4.71204	0	3.66492	0	1.04712	0	1737
LAML	IDH3B	1.04712	0.52356	1.04712	0.52356	0	0	3420
LAML	MAP3K4	0.52356	0	0.52356	0	0	0	4216
LGG	DLAT	13.2554	4.09357	12.8655	4.09357	0.389864	0	1737
LGG	IDH3B	9.16179	1.55945	8.77193	1.55945	0.389864	0	3420
LGG	MAP3K4	1.36452	15.7895	1.36452	13.8402	0	1.94932	4216
LIHC	DLAT	5.67568	25.1351	5.67568	24.8649	0	0.27027	1737
LIHC	IDH3B	28.6486	7.2973	28.1081	7.2973	0.54054	0	3420
LIHC	MAP3K4	11.0811	38.1081	10.5405	36.2162	0.54054	1.89189	4216
LUAD	DLAT	23.062	23.4496	21.8992	22.2868	1.16279	1.16279	1737
LUAD	IDH3B	32.7519	25.5814	31.7829	25	0.968992	0.581395	3420
LUAD	MAP3K4	8.33333	49.8062	8.13953	48.4496	0.193798	1.35659	4216
LUSC	DLAT	19.7605	35.1297	19.5609	33.9321	0.199601	1.1976	1737
LUSC	IDH3B	53.2934	8.98204	49.9002	8.98204	3.39321	0	3420
LUSC	MAP3K4	19.1617	25.9481	18.9621	25.5489	0.199601	0.399202	4216
MESO	DLAT	14.9425	17.2414	14.9425	17.2414	0	0	1737
MESO	IDH3B	9.1954	19.5402	9.1954	19.5402	0	0	3420
MESO	MAP3K4	2.29885	41.3793	2.29885	41.3793	0	0	4216
OV	DLAT	26.943	31.0881	23.4888	30.0518	3.45423	1.03627	1737
OV	IDH3B	55.4404	12.7807	46.8048	12.6079	8.63558	0.172712	3420
OV	MAP3K4	12.2625	64.2487	11.5717	61.3126	0.690846	2.9361	4216
PAAD	DLAT	10.3261	9.23913	9.78261	9.23913	0.543478	0	1737
PAAD	IDH3B	15.7609	13.587	15.7609	13.587	0	0	3420
PAAD	MAP3K4	2.17391	50	2.17391	50	0	0	4216
PCPG	DLAT	1.23457	27.7778	1.23457	27.7778	0	0	1737
PCPG	IDH3B	6.79012	2.46914	6.79012	2.46914	0	0	3420
PCPG	MAP3K4	3.7037	12.963	3.7037	12.963	0	0	4216
PRAD	DLAT	5.89431	8.13008	5.89431	6.09756	0	2.03252	1737
PRAD	IDH3B	5.0813	5.28455	5.0813	4.6748	0	0.609756	3420
PRAD	MAP3K4	0.813008	12.3984	0.813008	11.1789	0	1.21951	4216
READ	DLAT	15.7576	23.6364	15.7576	23.6364	0	0	1737
READ	IDH3B	47.8788	29.697	47.8788	29.697	0	0	3420
READ	MAP3K4	20	15.7576	20	15.7576	0	0	4216
SARC	DLAT	7.00389	45.9144	6.61479	42.4125	0.389105	3.50195	1737
SARC	IDH3B	21.7899	28.0156	20.2335	27.6265	1.55642	0.389105	3420
SARC	MAP3K4	23.3463	19.0661	21.0117	18.677	2.33463	0.389105	4216
SKCM	DLAT	5.99455	55.5858	5.99455	52.3161	0	3.26975	1737
SKCM	IDH3B	38.9646	8.99183	38.9646	8.44687	0	0.544959	3420
SKCM	MAP3K4	5.72207	60.218	5.72207	57.2207	0	2.99728	4216
STAD	DLAT	16.3265	21.542	15.6463	20.8617	0.680272	0.680272	1737
STAD	IDH3B	52.1542	6.34921	51.4739	6.34921	0.680272	0	3420
STAD	MAP3K4	16.3265	21.0884	15.4195	20.1814	0.90703	0.90703	4216
TGCT	DLAT	0.666667	81.3333	0.666667	75.3333	0	6	1737
TGCT	IDH3B	21.3333	23.3333	21.3333	23.3333	0	0	3420
TGCT	MAP3K4	15.3333	16	15.3333	15.3333	0	0.666667	4216
THCA	DLAT	1.002	1.80361	1.002	1.80361	0	0	1737
THCA	IDH3B	2.60521	0	2.60521	0	0	0	3420
THCA	MAP3K4	0.400802	1.2024	0.400802	1.2024	0	0	4216
THYM	DLAT	0.813008	5.69106	0.813008	5.69106	0	0	1737
THYM	IDH3B	8.13008	0.813008	8.13008	0.813008	0	0	3420
THYM	MAP3K4	0	17.0732	0	16.2602	0	0.813008	4216
UCEC	DLAT	4.63822	16.5121	4.45269	15.5844	0.185529	0.927644	1737
UCEC	IDH3B	20.2226	5.56586	19.1095	5.38033	1.11317	0.185529	3420
UCEC	MAP3K4	12.616	8.34879	11.6883	8.16327	0.927644	0.185529	4216
UCS	DLAT	19.6429	44.6429	17.8571	42.8571	1.78571	1.78571	1737
UCS	IDH3B	62.5	17.8571	62.5	17.8571	0	0	3420
UCS	MAP3K4	44.6429	14.2857	42.8571	14.2857	1.78571	0	4216
UVM	DLAT	12.5	3.75	12.5	2.5	0	1.25	1737
UVM	IDH3B	12.5	0	12.5	0	0	0	3420
UVM	MAP3K4	8.75	28.75	7.5	25	1.25	3.75	4216
