# Supplementary material for: A Multi-Omics Analysis of NASH-Related Prognostic Biomarkers Associated with Drug Sensitivity and Immune Infiltration in Hepatocellular Carcinoma
Source: J Clin Med. 2023 Feb 6;12(4):1286. doi: 10.3390/jcm12041286 (PMC9963320; doi:10.3390/jcm12041286)
Supplement: Supplementary file 1 [file jcm-12-01286-s001.zip › Table S6.xlsx]

## Sheet: SheetName
symbol	drug	cor	fdr	entrez
DLAT	16-beta-bromoandrosterone	-0.0226692	0.680369	1737
DLAT	1S,3R-RSL-3	-0.000621862	0.990108	1737
DLAT	3-Cl-AHPC	-0.133223	0.000490304	1737
DLAT	968	0.0329412	0.994522	1737
DLAT	A-804598	0.0100012	0.963536	1737
DLAT	AA-COCF3	-0.131889	0.00121417	1737
DLAT	ABT-199	-0.0397336	0.510751	1737
DLAT	ABT-737	-0.041351	0.389094	1737
DLAT	AC55649	0.0260009	0.857168	1737
DLAT	AGK-2	-0.0262752	0.951563	1737
DLAT	AM-580	-0.0528174	0.317422	1737
DLAT	AT-406	0.0160714	0.90973	1737
DLAT	AT13387	-0.144201	0.0128973	1737
DLAT	AT7867	-0.00573018	0.908766	1737
DLAT	AZ-3146	-0.107836	0.00839293	1737
DLAT	AZD1480	-0.0235246	0.784879	1737
DLAT	AZD4547	0.0141481	0.803235	1737
DLAT	AZD6482	0.093041	0.0702371	1737
DLAT	AZD7545	-0.154051	0.00017071	1737
DLAT	AZD7762	-0.0490708	0.224713	1737
DLAT	AZD8055	-0.0966313	0.0156862	1737
DLAT	B02	-0.0939507	0.0202359	1737
DLAT	BCL-LZH-4	-0.0560917	0.796299	1737
DLAT	BEC	-0.0470278	0.999979	1737
DLAT	BI-2536	-0.18911	2.32281e-07	1737
DLAT	BIBR-1532	-0.170368	4.7878e-05	1737
DLAT	BIRB-796	-0.105238	0.0164552	1737
DLAT	BIX-01294	-0.0607694	0.130091	1737
DLAT	BMS-195614	-0.10449	0.0596131	1737
DLAT	BMS-270394	-0.0217558	0.681986	1737
DLAT	BMS-345541	-0.0983163	0.0123459	1737
DLAT	BMS-536924	-0.0208952	0.742553	1737
DLAT	BMS-754807	-0.0451687	0.346256	1737
DLAT	BRD-A02303741	-0.0221139	0.721763	1737
DLAT	BRD-A05715709	0.00638337	0.972951	1737
DLAT	BRD-A71883111	-0.0976166	0.0208818	1737
DLAT	BRD-A86708339	-0.144995	0.0139124	1737
DLAT	BRD-A94377914	-0.0928715	0.103958	1737
DLAT	BRD-K01737880	-0.128055	0.537694	1737
DLAT	BRD-K02251932	-0.0696033	0.165422	1737
DLAT	BRD-K02492147	0.0664074	0.250749	1737
DLAT	BRD-K04800985	-0.0249965	0.99881	1737
DLAT	BRD-K09344309	-0.11518	0.796423	1737
DLAT	BRD-K09587429	0.0293355	0.678296	1737
DLAT	BRD-K11533227	-0.0650931	0.142585	1737
DLAT	BRD-K13999467	-0.100053	0.0172233	1737
DLAT	BRD-K14844214	-0.101398	0.0997249	1737
DLAT	BRD-K16147474	0.0546913	0.89019	1737
DLAT	BRD-K17060750	0.032031	0.561962	1737
DLAT	BRD-K19103580	-0.0887087	0.0589265	1737
DLAT	BRD-K24690302	-0.0987363	0.0179639	1737
DLAT	BRD-K26531177	-0.091857	0.0261395	1737
DLAT	BRD-K27224038	-0.0433114	0.886747	1737
DLAT	BRD-K27986637	-0.163183	0.234844	1737
DLAT	BRD-K28456706	-0.0768263	0.067116	1737
DLAT	BRD-K29086754	-0.0211431	0.947168	1737
DLAT	BRD-K29313308	-0.0802091	0.0594084	1737
DLAT	BRD-K30019337	-0.0278067	0.944981	1737
DLAT	BRD-K30748066	-0.0766287	0.700329	1737
DLAT	BRD-K33199242	0.00148804	0.997356	1737
DLAT	BRD-K33514849	-0.016856	0.999288	1737
DLAT	BRD-K34099515	-0.00848803	0.994398	1737
DLAT	BRD-K34222889	-0.102117	0.00789045	1737
DLAT	BRD-K34485477	0.00728106	0.998562	1737
DLAT	BRD-K35604418	-0.144646	0.000199015	1737
DLAT	BRD-K37390332	0.017981	0.960132	1737
DLAT	BRD-K41334119	-0.0456302	0.950025	1737
DLAT	BRD-K41597374	-0.16684	1.6147e-05	1737
DLAT	BRD-K42260513	-0.0307916	0.994633	1737
DLAT	BRD-K44224150	0.0996932	0.962786	1737
DLAT	BRD-K45681478	-0.0809192	0.0671224	1737
DLAT	BRD-K48334597	-0.104691	0.34598	1737
DLAT	BRD-K48477130	0.0377667	0.860184	1737
DLAT	BRD-K49290616	0.0328288	0.952146	1737
DLAT	BRD-K50799972	-0.0219928	0.796801	1737
DLAT	BRD-K51490254	-0.115761	0.0053362	1737
DLAT	BRD-K51831558	-0.096582	0.164794	1737
DLAT	BRD-K52037352	-0.0706463	0.257322	1737
DLAT	BRD-K55116708	-0.0652248	0.15223	1737
DLAT	BRD-K61166597	-0.123114	0.00189596	1737
DLAT	BRD-K63431240	-0.0561302	0.207835	1737
DLAT	BRD-K64610608	0.0690993	0.521479	1737
DLAT	BRD-K66453893	-0.125856	0.000937833	1737
DLAT	BRD-K66532283	-0.0881798	0.0297711	1737
DLAT	BRD-K70511574	-0.15831	2.7387e-05	1737
DLAT	BRD-K71781559	-0.00379866	0.99834	1737
DLAT	BRD-K75293299	-0.060249	0.825857	1737
DLAT	BRD-K78574327	-0.019637	0.988949	1737
DLAT	BRD-K80183349	-0.0876207	0.0277238	1737
DLAT	BRD-K84807411	-0.0419888	0.895758	1737
DLAT	BRD-K85133207	-0.0402562	0.388031	1737
DLAT	BRD-K86535717	-0.0353703	0.933476	1737
DLAT	BRD-K88742110	-0.104371	0.0108877	1737
DLAT	BRD-K90370028	-0.0237842	0.962378	1737
DLAT	BRD-K92856060	-0.132035	0.00108047	1737
DLAT	BRD-K96431673	-0.0136076	0.996861	1737
DLAT	BRD-K96970199	-0.0663675	0.998764	1737
DLAT	BRD-K97651142	-0.201162	4.43365e-07	1737
DLAT	BRD-K99006945	0.0315735	0.694084	1737
DLAT	BRD-M00053801	-0.0151228	0.911957	1737
DLAT	BRD1378	-0.01969	0.888904	1737
DLAT	BRD1812	-0.140388	0.00035055	1737
DLAT	BRD1835	-0.133796	0.00285146	1737
DLAT	BRD4132	-0.107165	0.0707213	1737
DLAT	BRD5468	-0.0106737	0.93135	1737
DLAT	BRD6340	-0.0752311	0.0617474	1737
DLAT	BRD8899	0.0399749	0.727047	1737
DLAT	BRD8958	-0.029789	0.982209	1737
DLAT	BRD9647	-0.0612397	0.22949	1737
DLAT	BRD9876	-0.0436879	0.492897	1737
DLAT	BYL-719	-0.0121867	0.891863	1737
DLAT	Bax channel blocker	-0.0783927	0.078445	1737
DLAT	C6-ceramide	-0.057505	0.587774	1737
DLAT	CAL-101	0.0653314	0.252635	1737
DLAT	CAY10576	0.0560684	0.436011	1737
DLAT	CAY10594	-0.0816503	0.139066	1737
DLAT	CAY10618	-0.153753	5.7806e-05	1737
DLAT	CBB-1007	0.0647971	0.691295	1737
DLAT	CCT036477	-0.0105285	0.814428	1737
DLAT	CD-1530	-0.0737156	0.160197	1737
DLAT	CD-437	-0.130786	0.000611534	1737
DLAT	CHIR-99021	-0.0542966	0.215554	1737
DLAT	CHM-1	-0.12051	0.00145311	1737
DLAT	CI-976	-0.0310606	0.849002	1737
DLAT	CID-5951923	-0.00831151	0.951054	1737
DLAT	CIL41	-0.0908994	0.185672	1737
DLAT	CIL55	0.0055779	0.988059	1737
DLAT	CIL55A	-0.0474081	0.465736	1737
DLAT	CIL56	-0.146181	0.0127194	1737
DLAT	CIL70	-0.0634552	0.298013	1737
DLAT	COL-3	-0.291877	2.26933e-11	1737
DLAT	CR-1-31B	-0.168897	4.93568e-06	1737
DLAT	Ch-55	-0.0474829	0.347598	1737
DLAT	Compound 1541A	-0.0418614	0.529206	1737
DLAT	Compound 23 citrate	-0.138434	0.000371681	1737
DLAT	Compound 7d-cis	-0.0380162	0.413769	1737
DLAT	DBeQ	-0.0735358	0.0915197	1737
DLAT	DNMDP	0.0973277	0.140097	1737
DLAT	ELCPK	-0.0804011	0.195126	1737
DLAT	ETP-46464	-0.102236	0.049217	1737
DLAT	EX-527	-0.011704	0.942309	1737
DLAT	FGIN-1-27	0.0299965	0.844279	1737
DLAT	FQI-1	-0.0994384	0.0777072	1737
DLAT	FQI-2	-0.133812	0.000367498	1737
DLAT	FSC231	0.0453119	0.99945	1737
DLAT	GANT-61	0.000205796	0.99717	1737
DLAT	GDC-0879	-0.0412516	0.477542	1737
DLAT	GDC-0941	-0.003834	0.947389	1737
DLAT	GMX-1778	-0.148415	0.000156062	1737
DLAT	GSK-3 inhibitor IX	-0.117414	0.00454652	1737
DLAT	GSK-J4	-0.121063	0.476791	1737
DLAT	GSK1059615	-0.0103246	0.980397	1737
DLAT	GSK2636771	0.0493308	0.619086	1737
DLAT	GSK4112	-0.0920123	0.0473991	1737
DLAT	GSK461364	-0.164689	1.2366e-05	1737
DLAT	GSK525762A	-0.0680702	0.0799758	1737
DLAT	GW-405833	-0.200894	9.04723e-08	1737
DLAT	GW-843682X	-0.138019	0.000554738	1737
DLAT	HBX-41108	-0.179801	0.000350715	1737
DLAT	HC-067047	-0.0374252	0.567075	1737
DLAT	HLI 373	-0.0324673	0.472825	1737
DLAT	I-BET151	-0.112023	0.00292763	1737
DLAT	IC-87114	0.0355618	0.627116	1737
DLAT	IPR-456	-0.00639667	0.977277	1737
DLAT	ISOX	-0.10787	0.00509457	1737
DLAT	IU1	-0.0482646	0.597203	1737
DLAT	JQ-1	-0.102569	0.00714479	1737
DLAT	JW-480	-0.0184958	0.921633	1737
DLAT	JW-55	0.0546416	0.691711	1737
DLAT	JW-74	0.00396472	0.976018	1737
DLAT	KH-CB19	0.0707715	0.511634	1737
DLAT	KHS101	-0.17924	9.16678e-06	1737
DLAT	KPT185	-0.104448	0.0220048	1737
DLAT	KU 0060648	-0.0497733	0.241081	1737
DLAT	KU-0063794	-0.0886154	0.0295861	1737
DLAT	KU-55933	-0.0716266	0.099028	1737
DLAT	KU-60019	-0.151644	7.8005e-05	1737
DLAT	KW-2449	-0.102094	0.00797401	1737
DLAT	KX2-391	-0.165037	1.2486e-05	1737
DLAT	Ki8751	-0.0246836	0.62621	1737
DLAT	Ko-143	-0.156588	5.7993e-05	1737
DLAT	L-685458	-0.0844371	0.122466	1737
DLAT	LE-135	-0.104812	0.0136878	1737
DLAT	LRRK2-IN-1	-0.113065	0.0138085	1737
DLAT	LY-2157299	-0.00351032	0.993541	1737
DLAT	LY-2183240	-0.140855	0.000172559	1737
DLAT	MG-132	-0.150841	0.0485918	1737
DLAT	MGCD-265	-0.125905	0.00111369	1737
DLAT	MI-1	-0.0565318	0.482234	1737
DLAT	MI-2	-0.225926	0.000268166	1737
DLAT	MK-0752	0.0917263	0.184105	1737
DLAT	MK-1775	-0.129522	0.000838176	1737
DLAT	MK-2206	-0.0383432	0.407454	1737
DLAT	ML006	-0.0950982	0.0637742	1737
DLAT	ML029	-0.143005	0.000642799	1737
DLAT	ML031	-0.120665	0.00450523	1737
DLAT	ML050	-0.0549797	0.212769	1737
DLAT	ML083	0.0279245	0.839741	1737
DLAT	ML162	0.00109753	0.984184	1737
DLAT	ML203	-0.0289054	0.611894	1737
DLAT	ML210	-0.0130735	0.781575	1737
DLAT	ML239	-0.0809185	0.0559912	1737
DLAT	ML258	-0.0949988	0.330222	1737
DLAT	ML311	-0.187318	3.87983e-07	1737
DLAT	ML312	0.025085	0.994265	1737
DLAT	ML320	-0.0444095	0.36431	1737
DLAT	ML334 diastereomer	-0.0288208	0.732629	1737
DLAT	MLN2238	-0.0712418	0.0743802	1737
DLAT	MLN2480	-0.027049	0.832507	1737
DLAT	MST-312	-0.111765	0.00377425	1737
DLAT	Mdivi-1	-0.115884	0.00462124	1737
DLAT	Merck60	-0.0761024	0.0495349	1737
DLAT	N9-isopropylolomoucine	-0.169981	1.7599e-05	1737
DLAT	NPC-26	-0.00801231	0.965421	1737
DLAT	NSC 74859	-0.0915658	0.060843	1737
DLAT	NSC19630	-0.0380593	0.469301	1737
DLAT	NSC23766	-0.00338756	0.944208	1737
DLAT	NSC30930	0.0636996	0.339172	1737
DLAT	NSC48300	-0.0693059	0.0816293	1737
DLAT	NSC632839	-0.138456	0.000269496	1737
DLAT	NSC95397	-0.134304	0.000928155	1737
DLAT	NVP-231	-0.152771	6.0181e-05	1737
DLAT	NVP-ADW742	-0.059674	0.189233	1737
DLAT	NVP-BEZ235	-0.0883497	0.0779698	1737
DLAT	NVP-BSK805	-0.047546	0.256191	1737
DLAT	NVP-TAE684	-0.048746	0.323745	1737
DLAT	O-6-benzylguanine	-0.0440221	0.754616	1737
DLAT	OSI-027	-0.0262412	0.582402	1737
DLAT	OSI-930	-0.129891	0.00270277	1737
DLAT	PAC-1	-0.168778	1.4365e-05	1737
DLAT	PD 153035	0.00298154	0.970732	1737
DLAT	PD318088	0.05745	0.234401	1737
DLAT	PDMP	-0.110255	0.00809144	1737
DLAT	PF-184	-0.114645	0.00345119	1737
DLAT	PF-3758309	-0.188667	0.000609167	1737
DLAT	PF-4800567 hydrochloride	-0.0647611	0.999586	1737
DLAT	PF-543	-0.0852588	0.0606596	1737
DLAT	PF-573228	-0.128438	0.000956053	1737
DLAT	PF-750	-0.208893	1.99321e-06	1737
DLAT	PHA-793887	-0.153314	4.0068e-05	1737
DLAT	PI-103	-0.00651043	0.894483	1737
DLAT	PIK-93	0.0202569	0.665638	1737
DLAT	PL-DI	-0.105478	0.00647797	1737
DLAT	PLX-4720	0.017037	0.854973	1737
DLAT	PRIMA-1	-0.0816391	0.0414787	1737
DLAT	PRIMA-1-Met	-0.00961017	0.910426	1737
DLAT	PRL-3 inhibitor I	-0.010088	0.954211	1737
DLAT	PX-12	-0.163068	1.5753e-05	1737
DLAT	PYR-41	-0.00452549	0.947479	1737
DLAT	QS-11	0.0177822	0.961162	1737
DLAT	QW-BI-011	-0.0986059	0.287572	1737
DLAT	R428	-0.021656	0.714099	1737
DLAT	RAF265	-0.0753413	0.163899	1737
DLAT	RG-108	-0.129364	0.00190371	1737
DLAT	RITA	-0.117042	0.00399173	1737
DLAT	RO4929097	-0.102707	0.166425	1737
DLAT	Repligen 136	-0.102792	0.0151814	1737
DLAT	SB-225002	-0.150631	4.9178e-05	1737
DLAT	SB-431542	-0.00778259	0.960649	1737
DLAT	SB-525334	-0.0398125	0.467653	1737
DLAT	SB-743921	-0.157078	2.1266e-05	1737
DLAT	SCH-529074	-0.0750546	0.108484	1737
DLAT	SCH-79797	-0.172144	5.61465e-06	1737
DLAT	SGX-523	0.0565933	0.330417	1737
DLAT	SID 26681509	-0.0276739	0.587107	1737
DLAT	SJ-172550	0.00999584	0.950807	1737
DLAT	SKI-II	-0.0609696	0.17972	1737
DLAT	SMER-3	-0.0656871	0.154165	1737
DLAT	SN-38	-0.0840163	0.059828	1737
DLAT	SNS-032	-0.0474999	0.270664	1737
DLAT	SNX-2112	-0.115275	0.00213602	1737
DLAT	SR-II-138A	-0.203134	2.37371e-08	1737
DLAT	SR1001	-0.039275	0.597572	1737
DLAT	SR8278	-0.258562	0.426582	1737
DLAT	SRT-1720	-0.0523137	0.261436	1737
DLAT	STF-31	-0.154906	7.5474e-05	1737
DLAT	SU11274	-0.138806	0.000442724	1737
DLAT	SZ4TA2	0.0354482	0.791936	1737
DLAT	StemRegenin 1	-0.181002	3.05372e-06	1737
DLAT	TG-100-115	0.0255837	0.668529	1737
DLAT	TG-101348	-0.0432084	0.316287	1737
DLAT	TGX-221	0.0726878	0.253798	1737
DLAT	TPCA-1	-0.0904312	0.0227182	1737
DLAT	TW-37	-0.185172	2.31641e-06	1737
DLAT	UNC0321	-0.0383934	0.740319	1737
DLAT	UNC0638	0.0305311	0.516803	1737
DLAT	VAF-347	-0.000231839	0.997466	1737
DLAT	VER-155008	-0.0932199	0.0245591	1737
DLAT	VU0155056	-0.0588433	0.822603	1737
DLAT	WAY-362450	0.0126503	0.998521	1737
DLAT	WP1130	-0.122056	0.00215803	1737
DLAT	WZ4002	0.0455127	0.544157	1737
DLAT	WZ8040	-0.00690989	0.915873	1737
DLAT	XL765	-0.0545376	0.349928	1737
DLAT	YK 4-279	-0.0992809	0.00953146	1737
DLAT	YM-155	-0.182489	3.2451e-05	1737
DLAT	ZSTK474	0.0261853	0.666326	1737
DLAT	abiraterone	-0.0639931	0.665348	1737
DLAT	afatinib	0.0195205	0.72166	1737
DLAT	alisertib	-0.105087	0.00689646	1737
DLAT	alvocidib	-0.161712	0.00451241	1737
DLAT	apicidin	-0.093566	0.0141077	1737
DLAT	austocystin D	-0.0379663	0.452487	1737
DLAT	avicin D	-0.00211106	0.986731	1737
DLAT	avrainvillamide	-0.0475981	0.35883	1737
DLAT	axitinib	-0.0822541	0.037265	1737
DLAT	azacitidine	-0.0835296	0.0739093	1737
DLAT	bafilomycin A1	-0.08052	0.893499	1737
DLAT	barasertib	-0.0700826	0.0827072	1737
DLAT	bardoxolone methyl	-0.195006	1.55993e-06	1737
DLAT	belinostat	-0.149635	0.00690888	1737
DLAT	bendamustine	-0.0372048	0.414095	1737
DLAT	betulinic acid	-0.0304054	0.86824	1737
DLAT	bexarotene	-0.0996053	0.0191441	1737
DLAT	birinapant	-0.00415426	0.963993	1737
DLAT	blebbistatin	-0.0422625	0.959354	1737
DLAT	bleomycin A2	0.0526379	0.345883	1737
DLAT	bortezomib	-0.0752439	0.0615995	1737
DLAT	bosutinib	-0.0556952	0.187249	1737
DLAT	brefeldin A	-0.0701541	0.11861	1737
DLAT	brivanib	-0.197439	4.91493e-07	1737
DLAT	cabozantinib	-0.0345162	0.517456	1737
DLAT	canertinib	0.0182964	0.735572	1737
DLAT	cediranib	0.0220232	0.890324	1737
DLAT	ceranib-2	-0.139501	0.000198019	1737
DLAT	cerulenin	-0.166222	1.1966e-05	1737
DLAT	chlorambucil	-0.103116	0.00858356	1737
DLAT	ciclopirox	-0.230298	3.03894e-10	1737
DLAT	ciclosporin	-0.0801897	0.123705	1737
DLAT	cimetidine	-0.0973421	0.932282	1737
DLAT	clofarabine	-0.148833	6.2472e-05	1737
DLAT	crizotinib	-0.0964385	0.0140624	1737
DLAT	cucurbitacin I	-0.0362065	0.414289	1737
DLAT	curcumin	-0.079618	0.0427501	1737
DLAT	cyanoquinoline 11	-0.0117347	0.921701	1737
DLAT	cyclophosphamide	0.0106273	0.999427	1737
DLAT	cytarabine hydrochloride	-0.20501	2.71661e-08	1737
DLAT	cytochalasin B	0.0258887	0.66181	1737
DLAT	dabrafenib	-0.0450496	0.584619	1737
DLAT	dacarbazine	-0.0983225	0.0117654	1737
DLAT	daporinad	-0.162988	0.000117309	1737
DLAT	darinaparsin	-0.00482808	0.95466	1737
DLAT	dasatinib	0.147915	0.000350269	1737
DLAT	decitabine	-0.160067	1.7166e-05	1737
DLAT	dexamethasone	-0.0209843	0.654467	1737
DLAT	dinaciclib	-0.174801	0.0016595	1737
DLAT	docetaxel	-0.19905	0.000543463	1737
DLAT	doxorubicin	-0.0728258	0.0565479	1737
DLAT	elocalcitol	-0.136899	0.000390464	1737
DLAT	entinostat	-0.12014	0.0018331	1737
DLAT	epigallocatechin-3-monogallate	-0.0830679	0.0645082	1737
DLAT	erastin	-0.0980133	0.0182758	1737
DLAT	erismodegib	-0.0493408	0.531681	1737
DLAT	erlotinib	0.0434418	0.365361	1737
DLAT	etomoxir	-0.0432205	0.948445	1737
DLAT	etoposide	-0.104884	0.00601657	1737
DLAT	fingolimod	-0.0699716	0.082174	1737
DLAT	fluorouracil	-0.146712	0.000121874	1737
DLAT	fluvastatin	0.0176189	0.782822	1737
DLAT	foretinib	-0.0521329	0.240312	1737
DLAT	fulvestrant	0.000909114	0.999168	1737
DLAT	fumonisin B1	0.0559875	0.333499	1737
DLAT	gefitinib	0.011111	0.86927	1737
DLAT	gemcitabine	-0.177448	5.92618e-06	1737
DLAT	gossypol	-0.188903	1.34056e-06	1737
DLAT	hyperforin	-0.126303	0.0746899	1737
DLAT	ibrutinib	-0.00216686	0.977193	1737
DLAT	ifosfamide	-0.000622523	0.998388	1737
DLAT	imatinib	-0.0972603	0.0198043	1737
DLAT	importazole	-0.0771689	0.185252	1737
DLAT	indisulam	-0.119948	0.00240173	1737
DLAT	isoevodiamine	-0.142745	0.000151765	1737
DLAT	isoliquiritigenin	-0.0676825	0.460913	1737
DLAT	isonicotinohydroxamic acid	-0.0290859	0.992739	1737
DLAT	istradefylline	-0.0497481	0.770881	1737
DLAT	itraconazole	-0.0423166	0.568571	1737
DLAT	lapatinib	-0.0136517	0.794324	1737
DLAT	lenvatinib	-0.0166868	0.761794	1737
DLAT	leptomycin B	-0.128369	0.000559827	1737
DLAT	linifanib	-0.199849	1.04345e-07	1737
DLAT	linsitinib	-0.154947	0.000146771	1737
DLAT	lomeguatrib	-0.0147838	0.825366	1737
DLAT	lovastatin	0.0120258	0.852193	1737
DLAT	manumycin A	-0.163654	1.3409e-05	1737
DLAT	marinopyrrole A	-0.183535	0.000183383	1737
DLAT	masitinib	-0.101366	0.0135384	1737
DLAT	methotrexate	-0.22076	2.55162e-08	1737
DLAT	methylstat	-0.0987393	0.0415911	1737
DLAT	mitomycin	-0.11931	0.00189184	1737
DLAT	momelotinib	-0.109243	0.00690876	1737
DLAT	myricetin	-0.087276	0.407134	1737
DLAT	myriocin	0.0473674	0.926859	1737
DLAT	nakiterpiosin	-0.178623	2.06083e-06	1737
DLAT	narciclasine	-0.149738	8.724e-05	1737
DLAT	navitoclax	-0.0417553	0.358405	1737
DLAT	necrostatin-1	-0.0848999	0.063216	1737
DLAT	necrostatin-7	-0.159507	0.000153366	1737
DLAT	necrosulfonamide	-0.136643	0.00358934	1737
DLAT	nelarabine	-0.00176625	0.997983	1737
DLAT	neopeltolide	-0.151675	0.0942029	1737
DLAT	neratinib	0.00819599	0.880143	1737
DLAT	neuronal differentiation inducer III	-0.16155	2.0409e-05	1737
DLAT	niclosamide	-0.130052	0.00156657	1737
DLAT	nilotinib	-0.0271989	0.775773	1737
DLAT	nintedanib	-0.0473711	0.396623	1737
DLAT	nutlin-3	-0.0547765	0.192635	1737
DLAT	obatoclax	-0.0652457	0.0995799	1737
DLAT	olaparib	-0.0863874	0.0315401	1737
DLAT	oligomycin A	-0.165334	2.1065e-05	1737
DLAT	omacetaxine mepesuccinate	-0.13205	0.00350532	1737
DLAT	ouabain	-0.103856	0.00661553	1737
DLAT	paclitaxel	-0.122009	0.00155047	1737
DLAT	palmostatin B	-0.0257043	0.844847	1737
DLAT	pandacostat	-0.0779359	0.089032	1737
DLAT	panobinostat	-0.125024	0.000894417	1737
DLAT	parbendazole	-0.137095	0.000220248	1737
DLAT	parthenolide	-0.0201694	0.762109	1737
DLAT	pazopanib	-0.134775	0.000552893	1737
DLAT	pevonedistat	-0.105887	0.00769392	1737
DLAT	phloretin	-0.166802	1.3742e-05	1737
DLAT	pifithrin-alpha	-0.109006	0.0388436	1737
DLAT	pifithrin-mu	-0.134624	0.000539983	1737
DLAT	piperlongumine	-0.100596	0.00823642	1737
DLAT	pitstop2	-0.0491565	0.796045	1737
DLAT	pluripotin	0.0253542	0.656614	1737
DLAT	procarbazine	-0.0138054	0.95719	1737
DLAT	prochlorperazine	-0.0805129	0.0722397	1737
DLAT	purmorphamine	-0.13602	0.00251168	1737
DLAT	pyrazolanthrone	-0.02712	0.634138	1737
DLAT	quizartinib	-0.0378807	0.554305	1737
DLAT	regorafenib	-0.0979172	0.0381911	1737
DLAT	rigosertib	-0.134214	0.000527419	1737
DLAT	ruxolitinib	-0.071978	0.0888057	1737
DLAT	salermide	-0.0473691	0.63894	1737
DLAT	saracatinib	0.0866541	0.0556619	1737
DLAT	selumetinib	0.0834435	0.0730297	1737
DLAT	semagacestat	0.0591739	0.633136	1737
DLAT	serdemetan	-0.0894614	0.0278042	1737
DLAT	sildenafil	-0.0365767	0.773027	1737
DLAT	silmitasertib	-0.0265822	0.780266	1737
DLAT	simvastatin	0.0727639	0.193398	1737
DLAT	sirolimus	-0.0815744	0.0405274	1737
DLAT	sitagliptin	0.0013747	0.998945	1737
DLAT	skepinone-L	-0.14621	0.0160682	1737
DLAT	sorafenib	-0.171933	3.0764e-05	1737
DLAT	sotrastaurin	-0.122518	0.00825083	1737
DLAT	spautin-1	-0.105604	0.0240068	1737
DLAT	staurosporine	0.0676901	0.624372	1737
DLAT	sunitinib	-0.0311734	0.474934	1737
DLAT	tacedinaline	-0.10085	0.0312587	1737
DLAT	tacrolimus	-0.124321	0.00256959	1737
DLAT	tamatinib	0.0486102	0.556593	1737
DLAT	tamoxifen	-0.00211933	0.981902	1737
DLAT	tandutinib	-0.0429946	0.3578	1737
DLAT	tanespimycin	-0.0509366	0.339639	1737
DLAT	temozolomide	-0.0411666	0.541285	1737
DLAT	temsirolimus	0.0227899	0.757086	1737
DLAT	teniposide	-0.153904	0.00402177	1737
DLAT	thalidomide	0.0262511	0.917088	1737
DLAT	tigecycline	-0.138464	0.0177983	1737
DLAT	tipifarnib-P1	-0.0776919	0.051303	1737
DLAT	tipifarnib-P2	-0.0633411	0.277098	1737
DLAT	tivantinib	-0.20001	0.000298366	1737
DLAT	tivozanib	0.00170855	0.979248	1737
DLAT	topotecan	-0.136408	0.000260361	1737
DLAT	tosedostat	-0.0874986	0.0395622	1737
DLAT	tozasertib	-0.0635353	0.74613	1737
DLAT	trametinib	0.137684	0.0441419	1737
DLAT	tretinoin	-0.0837512	0.0428468	1737
DLAT	triazolothiadiazine	-0.179642	9.99376e-07	1737
DLAT	trifluoperazine	-0.0496582	0.34902	1737
DLAT	triptolide	-0.127219	0.00106224	1737
DLAT	tubastatin A	0.0100518	0.894083	1737
DLAT	valdecoxib	-0.211775	4.78137e-08	1737
DLAT	vandetanib	0.103524	0.0265011	1737
DLAT	veliparib	-0.0326595	0.705771	1737
DLAT	vemurafenib	0.0570407	0.306756	1737
DLAT	vincristine	-0.164602	6.23841e-06	1737
DLAT	vorapaxar	-0.07469	0.105675	1737
DLAT	vorinostat	-0.149583	8.2565e-05	1737
DLAT	zebularine	-0.121544	0.00193436	1737
IDH3B	16-beta-bromoandrosterone	0.0475873	0.340642	3420
IDH3B	1S,3R-RSL-3	-0.0361063	0.405262	3420
IDH3B	3-Cl-AHPC	-0.0544097	0.17644	3420
IDH3B	968	-0.0397591	0.991998	3420
IDH3B	A-804598	0.0719495	0.613544	3420
IDH3B	AA-COCF3	-0.0297265	0.508377	3420
IDH3B	ABT-199	0.0578541	0.318027	3420
IDH3B	ABT-737	0.000881868	0.98848	3420
IDH3B	AC55649	0.0359995	0.783596	3420
IDH3B	AGK-2	-0.0136523	0.980243	3420
IDH3B	AM-580	-0.0398596	0.474113	3420
IDH3B	AT-406	0.0621274	0.548001	3420
IDH3B	AT13387	-0.0787487	0.190723	3420
IDH3B	AT7867	-0.0469879	0.279921	3420
IDH3B	AZ-3146	-0.0873844	0.0359472	3420
IDH3B	AZD1480	0.00376132	0.96921	3420
IDH3B	AZD4547	-0.00599214	0.92132	3420
IDH3B	AZD6482	-0.000120088	0.998437	3420
IDH3B	AZD7545	-0.0861926	0.0428915	3420
IDH3B	AZD7762	-0.100874	0.00899796	3420
IDH3B	AZD8055	-0.0673793	0.0986713	3420
IDH3B	B02	-0.0492381	0.243468	3420
IDH3B	BCL-LZH-4	0.072589	0.706573	3420
IDH3B	BEC	-0.0445834	0.999979	3420
IDH3B	BI-2536	-0.14111	0.000136004	3420
IDH3B	BIBR-1532	-0.0855784	0.055612	3420
IDH3B	BIRB-796	-0.0713679	0.116512	3420
IDH3B	BIX-01294	-0.0359681	0.385505	3420
IDH3B	BMS-195614	-0.0914817	0.102985	3420
IDH3B	BMS-270394	-0.0284492	0.581244	3420
IDH3B	BMS-345541	-0.114328	0.00342646	3420
IDH3B	BMS-536924	-0.00151336	0.984312	3420
IDH3B	BMS-754807	0.0205927	0.698663	3420
IDH3B	BRD-A02303741	-0.0167168	0.79626	3420
IDH3B	BRD-A05715709	-0.0091635	0.959315	3420
IDH3B	BRD-A71883111	0.0205378	0.680455	3420
IDH3B	BRD-A86708339	-0.111035	0.064346	3420
IDH3B	BRD-A94377914	-0.0690588	0.238066	3420
IDH3B	BRD-K01737880	0.071471	0.762226	3420
IDH3B	BRD-K02251932	-0.0581429	0.257375	3420
IDH3B	BRD-K02492147	0.0451053	0.459806	3420
IDH3B	BRD-K04800985	-0.0176631	0.99881	3420
IDH3B	BRD-K09344309	-0.000657784	0.999214	3420
IDH3B	BRD-K09587429	0.0393118	0.56265	3420
IDH3B	BRD-K11533227	-0.0630147	0.157095	3420
IDH3B	BRD-K13999467	-0.0382956	0.407724	3420
IDH3B	BRD-K14844214	-0.0208143	0.812983	3420
IDH3B	BRD-K16147474	0.0566789	0.89019	3420
IDH3B	BRD-K17060750	0.0518986	0.31225	3420
IDH3B	BRD-K19103580	-0.0320872	0.556823	3420
IDH3B	BRD-K24690302	-0.0876065	0.0374857	3420
IDH3B	BRD-K26531177	-0.046787	0.279612	3420
IDH3B	BRD-K27224038	-0.0572443	0.83835	3420
IDH3B	BRD-K27986637	0.0211979	0.925352	3420
IDH3B	BRD-K28456706	-0.0880121	0.0342387	3420
IDH3B	BRD-K29086754	-0.0411312	0.870512	3420
IDH3B	BRD-K29313308	-0.0455484	0.310357	3420
IDH3B	BRD-K30019337	-0.026865	0.947904	3420
IDH3B	BRD-K30748066	-0.1439	0.42958	3420
IDH3B	BRD-K33199242	0.076244	0.908186	3420
IDH3B	BRD-K33514849	-0.0255096	0.999288	3420
IDH3B	BRD-K34099515	-0.0923472	0.89134	3420
IDH3B	BRD-K34222889	-0.0443584	0.270447	3420
IDH3B	BRD-K34485477	-0.0369808	0.998562	3420
IDH3B	BRD-K35604418	-0.0835796	0.0364603	3420
IDH3B	BRD-K37390332	-0.0247148	0.936698	3420
IDH3B	BRD-K41334119	-0.040724	0.955092	3420
IDH3B	BRD-K41597374	-0.037445	0.385194	3420
IDH3B	BRD-K42260513	-0.0120694	0.998533	3420
IDH3B	BRD-K44224150	-0.013773	0.998293	3420
IDH3B	BRD-K45681478	-0.084019	0.0561742	3420
IDH3B	BRD-K48334597	-0.018615	0.904819	3420
IDH3B	BRD-K48477130	-0.0245525	0.916237	3420
IDH3B	BRD-K49290616	0.0963385	0.777967	3420
IDH3B	BRD-K50799972	-0.0125539	0.896722	3420
IDH3B	BRD-K51490254	-0.0180678	0.701129	3420
IDH3B	BRD-K51831558	-0.0213803	0.795598	3420
IDH3B	BRD-K52037352	-0.0256768	0.727117	3420
IDH3B	BRD-K55116708	-0.0421448	0.380219	3420
IDH3B	BRD-K61166597	-0.0928982	0.0207775	3420
IDH3B	BRD-K63431240	-0.0753096	0.0802696	3420
IDH3B	BRD-K64610608	0.0575638	0.601304	3420
IDH3B	BRD-K66453893	-0.0651648	0.0964918	3420
IDH3B	BRD-K66532283	-0.0983511	0.0146691	3420
IDH3B	BRD-K70511574	-0.0728591	0.062849	3420
IDH3B	BRD-K71781559	-0.0598312	0.956701	3420
IDH3B	BRD-K75293299	-0.000967696	0.997247	3420
IDH3B	BRD-K78574327	-0.0409124	0.977601	3420
IDH3B	BRD-K80183349	-0.107124	0.00645468	3420
IDH3B	BRD-K84807411	-0.0621174	0.832528	3420
IDH3B	BRD-K85133207	-0.0242709	0.619797	3420
IDH3B	BRD-K86535717	0.0323926	0.940279	3420
IDH3B	BRD-K88742110	-0.0551832	0.201304	3420
IDH3B	BRD-K90370028	0.025048	0.960521	3420
IDH3B	BRD-K92856060	-0.072013	0.0883049	3420
IDH3B	BRD-K96431673	-0.0179493	0.996572	3420
IDH3B	BRD-K96970199	-0.0140576	0.998764	3420
IDH3B	BRD-K97651142	-0.0864274	0.038424	3420
IDH3B	BRD-K99006945	0.0391138	0.618434	3420
IDH3B	BRD-M00053801	0.0347063	0.768112	3420
IDH3B	BRD1378	0.0453048	0.687463	3420
IDH3B	BRD1812	-0.0253137	0.567604	3420
IDH3B	BRD1835	-0.0798992	0.0859973	3420
IDH3B	BRD4132	-0.0549268	0.384519	3420
IDH3B	BRD5468	0.0579349	0.475076	3420
IDH3B	BRD6340	-0.0244374	0.571351	3420
IDH3B	BRD8899	0.0257796	0.832214	3420
IDH3B	BRD8958	0.0158084	0.983739	3420
IDH3B	BRD9647	-0.0192229	0.755675	3420
IDH3B	BRD9876	0.024748	0.725251	3420
IDH3B	BYL-719	0.105931	0.0794224	3420
IDH3B	Bax channel blocker	-0.0400169	0.402703	3420
IDH3B	C6-ceramide	0.0416433	0.718469	3420
IDH3B	CAL-101	0.0256767	0.718257	3420
IDH3B	CAY10576	-0.0693336	0.318352	3420
IDH3B	CAY10594	-0.000555398	0.993971	3420
IDH3B	CAY10618	-0.0972885	0.0137902	3420
IDH3B	CBB-1007	0.0781057	0.60603	3420
IDH3B	CCT036477	-0.0175138	0.690696	3420
IDH3B	CD-1530	-0.0217528	0.736573	3420
IDH3B	CD-437	-0.0944205	0.0150219	3420
IDH3B	CHIR-99021	-0.0500444	0.25718	3420
IDH3B	CHM-1	-0.0692425	0.0744355	3420
IDH3B	CI-976	0.0439886	0.766991	3420
IDH3B	CID-5951923	0.0454805	0.605025	3420
IDH3B	CIL41	-0.0865832	0.209747	3420
IDH3B	CIL55	-0.0627191	0.785492	3420
IDH3B	CIL55A	-0.0577903	0.36373	3420
IDH3B	CIL56	-0.0604537	0.337917	3420
IDH3B	CIL70	-0.0646144	0.287958	3420
IDH3B	COL-3	-0.105037	0.0221524	3420
IDH3B	CR-1-31B	-0.0567702	0.139896	3420
IDH3B	Ch-55	-0.0286625	0.600409	3420
IDH3B	Compound 1541A	-0.0462144	0.474601	3420
IDH3B	Compound 23 citrate	-0.0278549	0.510946	3420
IDH3B	Compound 7d-cis	-0.0192373	0.694514	3420
IDH3B	DBeQ	-0.0058874	0.907525	3420
IDH3B	DNMDP	0.106385	0.109399	3420
IDH3B	ELCPK	-0.0806865	0.193377	3420
IDH3B	ETP-46464	-0.053931	0.337849	3420
IDH3B	EX-527	0.0386334	0.762607	3420
IDH3B	FGIN-1-27	-0.0288609	0.849942	3420
IDH3B	FQI-1	-0.0697782	0.22797	3420
IDH3B	FQI-2	-0.0910381	0.0173457	3420
IDH3B	FSC231	0.0954172	0.99945	3420
IDH3B	GANT-61	-0.0100163	0.899543	3420
IDH3B	GDC-0879	-0.0629823	0.234258	3420
IDH3B	GDC-0941	-0.0152121	0.7791	3420
IDH3B	GMX-1778	-0.0669017	0.11058	3420
IDH3B	GSK-3 inhibitor IX	-0.0870883	0.0391485	3420
IDH3B	GSK-J4	-0.0493454	0.795716	3420
IDH3B	GSK1059615	0.0791957	0.74093	3420
IDH3B	GSK2636771	0.0226451	0.853463	3420
IDH3B	GSK4112	-0.00566582	0.932022	3420
IDH3B	GSK461364	-0.130219	0.000621274	3420
IDH3B	GSK525762A	-0.105509	0.00559509	3420
IDH3B	GW-405833	-0.124801	0.00117713	3420
IDH3B	GW-843682X	-0.149612	0.000170414	3420
IDH3B	HBX-41108	-0.0225303	0.731507	3420
IDH3B	HC-067047	0.0268534	0.699292	3420
IDH3B	HLI 373	-0.0487696	0.265546	3420
IDH3B	I-BET151	-0.0968221	0.0105485	3420
IDH3B	IC-87114	-0.0327139	0.661754	3420
IDH3B	IPR-456	0.01416	0.945555	3420
IDH3B	ISOX	-0.10676	0.00558211	3420
IDH3B	IU1	0.0191845	0.865534	3420
IDH3B	JQ-1	-0.0643533	0.0990726	3420
IDH3B	JW-480	0.0417432	0.821468	3420
IDH3B	JW-55	0.103299	0.409005	3420
IDH3B	JW-74	0.0415176	0.659366	3420
IDH3B	KH-CB19	0.139222	0.225335	3420
IDH3B	KHS101	0.00590834	0.906262	3420
IDH3B	KPT185	-0.0209187	0.678015	3420
IDH3B	KU 0060648	-0.0358041	0.411784	3420
IDH3B	KU-0063794	-0.047039	0.266669	3420
IDH3B	KU-55933	-0.0489166	0.27778	3420
IDH3B	KU-60019	-0.0880346	0.0263577	3420
IDH3B	KW-2449	-0.109939	0.00410911	3420
IDH3B	KX2-391	-0.0863184	0.0264248	3420
IDH3B	Ki8751	-0.025792	0.608478	3420
IDH3B	Ko-143	-0.0660566	0.107093	3420
IDH3B	L-685458	-0.0119373	0.879727	3420
IDH3B	LE-135	-0.0828336	0.0557109	3420
IDH3B	LRRK2-IN-1	-0.10223	0.0266768	3420
IDH3B	LY-2157299	-0.0510355	0.849331	3420
IDH3B	LY-2183240	-0.0871496	0.0226273	3420
IDH3B	MG-132	-0.137888	0.0750789	3420
IDH3B	MGCD-265	-0.0968189	0.0133419	3420
IDH3B	MI-1	0.00904289	0.940931	3420
IDH3B	MI-2	-0.0775545	0.254947	3420
IDH3B	MK-0752	0.0895947	0.191474	3420
IDH3B	MK-1775	-0.0582293	0.150682	3420
IDH3B	MK-2206	-0.0377443	0.415546	3420
IDH3B	ML006	-0.0017343	0.979484	3420
IDH3B	ML029	0.0242628	0.624915	3420
IDH3B	ML031	-0.0620389	0.161679	3420
IDH3B	ML050	-0.000509779	0.99247	3420
IDH3B	ML083	0.050447	0.668846	3420
IDH3B	ML162	-0.0198568	0.676617	3420
IDH3B	ML203	-0.0692747	0.177723	3420
IDH3B	ML210	-0.0531642	0.212399	3420
IDH3B	ML239	-0.028244	0.553211	3420
IDH3B	ML258	0.0441885	0.680582	3420
IDH3B	ML311	-0.111081	0.00331372	3420
IDH3B	ML312	0.0195885	0.994829	3420
IDH3B	ML320	-0.0743555	0.104846	3420
IDH3B	ML334 diastereomer	0.0027258	0.978001	3420
IDH3B	MLN2238	-0.0690205	0.0845545	3420
IDH3B	MLN2480	-0.00675338	0.965644	3420
IDH3B	MST-312	-0.0582994	0.1435	3420
IDH3B	Mdivi-1	-0.094243	0.0232537	3420
IDH3B	Merck60	-0.0695819	0.0738756	3420
IDH3B	N9-isopropylolomoucine	-0.0783952	0.0571621	3420
IDH3B	NPC-26	-0.0104004	0.953196	3420
IDH3B	NSC 74859	-0.0438876	0.418003	3420
IDH3B	NSC19630	-0.000706762	0.99112	3420
IDH3B	NSC23766	0.0167391	0.716553	3420
IDH3B	NSC30930	0.0268534	0.748832	3420
IDH3B	NSC48300	-0.0531335	0.189317	3420
IDH3B	NSC632839	-0.0320891	0.433441	3420
IDH3B	NSC95397	-0.102785	0.0123004	3420
IDH3B	NVP-231	-0.0859403	0.028577	3420
IDH3B	NVP-ADW742	0.00309735	0.955809	3420
IDH3B	NVP-BEZ235	-0.0260321	0.638842	3420
IDH3B	NVP-BSK805	-0.0561986	0.174172	3420
IDH3B	NVP-TAE684	0.024976	0.647675	3420
IDH3B	O-6-benzylguanine	0.0248799	0.877111	3420
IDH3B	OSI-027	-0.00639537	0.90335	3420
IDH3B	OSI-930	-0.0355134	0.454272	3420
IDH3B	PAC-1	-0.0895508	0.0258405	3420
IDH3B	PD 153035	0.0897828	0.106443	3420
IDH3B	PD318088	0.0257569	0.641849	3420
IDH3B	PDMP	-0.0311051	0.505485	3420
IDH3B	PF-184	-0.107646	0.00621831	3420
IDH3B	PF-3758309	-0.116619	0.0387787	3420
IDH3B	PF-4800567 hydrochloride	0.0107269	0.999586	3420
IDH3B	PF-543	-0.0213736	0.688067	3420
IDH3B	PF-573228	-0.0760939	0.0587994	3420
IDH3B	PF-750	-0.0363723	0.474451	3420
IDH3B	PHA-793887	-0.0940445	0.0133705	3420
IDH3B	PI-103	0.0100128	0.837324	3420
IDH3B	PIK-93	0.00645684	0.896766	3420
IDH3B	PL-DI	-0.0780508	0.0470238	3420
IDH3B	PLX-4720	-0.0446814	0.554766	3420
IDH3B	PRIMA-1	-0.0629692	0.12082	3420
IDH3B	PRIMA-1-Met	-0.0598399	0.414502	3420
IDH3B	PRL-3 inhibitor I	0.0540209	0.660632	3420
IDH3B	PX-12	-0.103846	0.0069022	3420
IDH3B	PYR-41	0.0300173	0.606167	3420
IDH3B	QS-11	0.0342272	0.91745	3420
IDH3B	QW-BI-011	-0.00267418	0.981844	3420
IDH3B	R428	-0.0259673	0.656272	3420
IDH3B	RAF265	-0.00885045	0.904151	3420
IDH3B	RG-108	-0.0511092	0.274991	3420
IDH3B	RITA	-0.0140708	0.771038	3420
IDH3B	RO4929097	-0.0988193	0.184363	3420
IDH3B	Repligen 136	-0.0398529	0.383332	3420
IDH3B	SB-225002	-0.0926685	0.0145758	3420
IDH3B	SB-431542	0.0180852	0.888024	3420
IDH3B	SB-525334	-0.052387	0.317777	3420
IDH3B	SB-743921	-0.0844063	0.0259963	3420
IDH3B	SCH-529074	-0.0138403	0.806666	3420
IDH3B	SCH-79797	-0.159288	2.8687e-05	3420
IDH3B	SGX-523	0.0757043	0.170647	3420
IDH3B	SID 26681509	-0.0394505	0.420045	3420
IDH3B	SJ-172550	0.00854568	0.960126	3420
IDH3B	SKI-II	-0.0459429	0.32701	3420
IDH3B	SMER-3	-0.0273053	0.587921	3420
IDH3B	SN-38	-0.0754153	0.0942844	3420
IDH3B	SNS-032	-0.0145897	0.752991	3420
IDH3B	SNX-2112	-0.0602577	0.119067	3420
IDH3B	SR-II-138A	-0.0711691	0.0597598	3420
IDH3B	SR1001	0.00632285	0.948284	3420
IDH3B	SR8278	-0.15405	0.633956	3420
IDH3B	SRT-1720	-0.0465257	0.323412	3420
IDH3B	STF-31	-0.121944	0.00217465	3420
IDH3B	SU11274	-0.08107	0.0466031	3420
IDH3B	SZ4TA2	0.0755788	0.494368	3420
IDH3B	StemRegenin 1	-0.0870953	0.0313126	3420
IDH3B	TG-100-115	0.00959231	0.882321	3420
IDH3B	TG-101348	-0.0318991	0.470376	3420
IDH3B	TGX-221	-0.00356366	0.979576	3420
IDH3B	TPCA-1	-0.0572304	0.163196	3420
IDH3B	TW-37	-0.0812499	0.0460334	3420
IDH3B	UNC0321	-0.0325742	0.790311	3420
IDH3B	UNC0638	-0.0331186	0.479448	3420
IDH3B	VAF-347	0.0328517	0.648049	3420
IDH3B	VER-155008	-0.0275041	0.550913	3420
IDH3B	VU0155056	0.0430819	0.897925	3420
IDH3B	WAY-362450	0.0112653	0.998521	3420
IDH3B	WP1130	-0.0134084	0.773847	3420
IDH3B	WZ4002	0.0916289	0.156419	3420
IDH3B	WZ8040	0.0412374	0.450044	3420
IDH3B	XL765	0.0433524	0.478891	3420
IDH3B	YK 4-279	-0.0521822	0.188567	3420
IDH3B	YM-155	-0.0194449	0.726135	3420
IDH3B	ZSTK474	0.0337079	0.562535	3420
IDH3B	abiraterone	0.123386	0.333776	3420
IDH3B	afatinib	0.0373618	0.464426	3420
IDH3B	alisertib	-0.0855192	0.029766	3420
IDH3B	alvocidib	-0.109323	0.0603229	3420
IDH3B	apicidin	-0.0860162	0.0245444	3420
IDH3B	austocystin D	0.0488927	0.319385	3420
IDH3B	avicin D	0.0167187	0.89147	3420
IDH3B	avrainvillamide	0.04603	0.376065	3420
IDH3B	axitinib	-0.057217	0.157813	3420
IDH3B	azacitidine	-0.0305758	0.555404	3420
IDH3B	bafilomycin A1	-0.115366	0.832907	3420
IDH3B	barasertib	-0.0151996	0.735358	3420
IDH3B	bardoxolone methyl	-0.0734376	0.0855687	3420
IDH3B	belinostat	-0.113427	0.0436423	3420
IDH3B	bendamustine	-0.0276902	0.55204	3420
IDH3B	betulinic acid	-0.0261181	0.892251	3420
IDH3B	bexarotene	-0.0559902	0.207495	3420
IDH3B	birinapant	0.0507631	0.434662	3420
IDH3B	blebbistatin	-0.0395773	0.962395	3420
IDH3B	bleomycin A2	0.109973	0.0257025	3420
IDH3B	bortezomib	-0.0477906	0.251189	3420
IDH3B	bosutinib	-0.0515372	0.225834	3420
IDH3B	brefeldin A	0.0117776	0.822808	3420
IDH3B	brivanib	-0.183965	2.96213e-06	3420
IDH3B	cabozantinib	0.00783933	0.901758	3420
IDH3B	canertinib	0.0792718	0.0801496	3420
IDH3B	cediranib	0.00328342	0.985767	3420
IDH3B	ceranib-2	-0.0515978	0.192331	3420
IDH3B	cerulenin	-0.049974	0.215062	3420
IDH3B	chlorambucil	-0.0848594	0.0325262	3420
IDH3B	ciclopirox	-0.13068	0.000473698	3420
IDH3B	ciclosporin	0.0469502	0.403924	3420
IDH3B	cimetidine	-0.0115645	0.99519	3420
IDH3B	clofarabine	-0.12403	0.000929408	3420
IDH3B	crizotinib	-0.0269061	0.529012	3420
IDH3B	cucurbitacin I	0.0181645	0.699146	3420
IDH3B	curcumin	-0.0537853	0.180466	3420
IDH3B	cyanoquinoline 11	-1.95636e-06	0.999972	3420
IDH3B	cyclophosphamide	0.0741428	0.993392	3420
IDH3B	cytarabine hydrochloride	-0.124145	0.000964882	3420
IDH3B	cytochalasin B	0.00872139	0.89579	3420
IDH3B	dabrafenib	-0.0644842	0.406726	3420
IDH3B	dacarbazine	-0.0586578	0.143538	3420
IDH3B	daporinad	-0.0953761	0.0312728	3420
IDH3B	darinaparsin	-0.0408906	0.572308	3420
IDH3B	dasatinib	0.0743258	0.10351	3420
IDH3B	decitabine	-0.088628	0.0202771	3420
IDH3B	dexamethasone	-0.0268847	0.559998	3420
IDH3B	dinaciclib	-0.130072	0.021069	3420
IDH3B	docetaxel	-0.109613	0.0696308	3420
IDH3B	doxorubicin	-0.0571244	0.139887	3420
IDH3B	elocalcitol	-0.0961633	0.0139077	3420
IDH3B	entinostat	-0.0187389	0.66183	3420
IDH3B	epigallocatechin-3-monogallate	-0.040708	0.404713	3420
IDH3B	erastin	-0.116763	0.00430517	3420
IDH3B	erismodegib	0.0276792	0.759922	3420
IDH3B	erlotinib	0.0519313	0.266304	3420
IDH3B	etomoxir	0.0634577	0.948445	3420
IDH3B	etoposide	-0.0596612	0.129319	3420
IDH3B	fingolimod	-0.00351182	0.940254	3420
IDH3B	fluorouracil	-0.0856675	0.0281769	3420
IDH3B	fluvastatin	0.049515	0.359718	3420
IDH3B	foretinib	0.010292	0.844465	3420
IDH3B	fulvestrant	-0.0361681	0.942124	3420
IDH3B	fumonisin B1	-0.00473944	0.956539	3420
IDH3B	gefitinib	0.0281755	0.634359	3420
IDH3B	gemcitabine	-0.128281	0.00125628	3420
IDH3B	gossypol	-0.0525156	0.209114	3420
IDH3B	hyperforin	-0.0293847	0.773655	3420
IDH3B	ibrutinib	0.0350157	0.589043	3420
IDH3B	ifosfamide	0.0277995	0.910388	3420
IDH3B	imatinib	-0.0670673	0.119335	3420
IDH3B	importazole	-3.3157e-05	0.999713	3420
IDH3B	indisulam	0.00505518	0.912776	3420
IDH3B	isoevodiamine	-0.0473606	0.232812	3420
IDH3B	isoliquiritigenin	-0.0298846	0.763783	3420
IDH3B	isonicotinohydroxamic acid	0.0390239	0.99255	3420
IDH3B	istradefylline	0.0813868	0.57626	3420
IDH3B	itraconazole	0.0127821	0.89233	3420
IDH3B	lapatinib	0.0105273	0.84321	3420
IDH3B	lenvatinib	0.0380025	0.437696	3420
IDH3B	leptomycin B	-0.041117	0.295185	3420
IDH3B	linifanib	-0.0952696	0.0144214	3420
IDH3B	linsitinib	-0.01176	0.818325	3420
IDH3B	lomeguatrib	-0.0143345	0.831565	3420
IDH3B	lovastatin	-0.0121747	0.850335	3420
IDH3B	manumycin A	-0.126226	0.000892297	3420
IDH3B	marinopyrrole A	-0.11247	0.025922	3420
IDH3B	masitinib	-0.0500633	0.248843	3420
IDH3B	methotrexate	-0.174844	1.2781e-05	3420
IDH3B	methylstat	-0.0219486	0.686183	3420
IDH3B	mitomycin	-0.0213113	0.616539	3420
IDH3B	momelotinib	-0.0732227	0.0774923	3420
IDH3B	myricetin	-0.0289821	0.811185	3420
IDH3B	myriocin	-0.0473651	0.926859	3420
IDH3B	nakiterpiosin	-0.0825608	0.0348934	3420
IDH3B	narciclasine	-0.085057	0.0293189	3420
IDH3B	navitoclax	-0.0214403	0.659942	3420
IDH3B	necrostatin-1	-0.0354704	0.483088	3420
IDH3B	necrostatin-7	-0.026633	0.598608	3420
IDH3B	necrosulfonamide	-0.065525	0.181102	3420
IDH3B	nelarabine	-0.00359139	0.994889	3420
IDH3B	neopeltolide	-0.0265449	0.817408	3420
IDH3B	neratinib	0.0427445	0.355287	3420
IDH3B	neuronal differentiation inducer III	-0.0743981	0.0580556	3420
IDH3B	niclosamide	-0.0672757	0.127174	3420
IDH3B	nilotinib	-0.00535873	0.963755	3420
IDH3B	nintedanib	-0.018395	0.782675	3420
IDH3B	nutlin-3	0.0242396	0.587222	3420
IDH3B	obatoclax	-0.0920007	0.0180309	3420
IDH3B	olaparib	-0.0321128	0.462123	3420
IDH3B	oligomycin A	-0.0704157	0.0830599	3420
IDH3B	omacetaxine mepesuccinate	-0.0372827	0.444228	3420
IDH3B	ouabain	-0.0620191	0.113538	3420
IDH3B	paclitaxel	-0.0820908	0.0370227	3420
IDH3B	palmostatin B	-0.0118024	0.940032	3420
IDH3B	pandacostat	-0.0168946	0.747555	3420
IDH3B	panobinostat	-0.0703279	0.068871	3420
IDH3B	parbendazole	-0.086797	0.0216368	3420
IDH3B	parthenolide	-0.000703925	0.991919	3420
IDH3B	pazopanib	-0.0815188	0.0428966	3420
IDH3B	pevonedistat	-0.122394	0.00190452	3420
IDH3B	phloretin	-0.0694175	0.0838757	3420
IDH3B	pifithrin-alpha	0.0102787	0.901894	3420
IDH3B	pifithrin-mu	-0.0799284	0.046346	3420
IDH3B	piperlongumine	-0.0802811	0.0367847	3420
IDH3B	pitstop2	-0.00466249	0.987945	3420
IDH3B	pluripotin	-0.0257094	0.651062	3420
IDH3B	procarbazine	0.00164108	0.994945	3420
IDH3B	prochlorperazine	-0.0144468	0.795283	3420
IDH3B	purmorphamine	-0.0672812	0.154322	3420
IDH3B	pyrazolanthrone	-0.0155838	0.800935	3420
IDH3B	quizartinib	0.00297339	0.970525	3420
IDH3B	regorafenib	-0.0238868	0.669338	3420
IDH3B	rigosertib	-0.0678056	0.0912788	3420
IDH3B	ruxolitinib	-0.0593656	0.169763	3420
IDH3B	salermide	0.0407633	0.701123	3420
IDH3B	saracatinib	0.0736951	0.113142	3420
IDH3B	selumetinib	0.0168347	0.779839	3420
IDH3B	semagacestat	0.0695937	0.557778	3420
IDH3B	serdemetan	-0.0343722	0.425907	3420
IDH3B	sildenafil	0.0478802	0.694289	3420
IDH3B	silmitasertib	0.0247937	0.797929	3420
IDH3B	simvastatin	0.0275123	0.678276	3420
IDH3B	sirolimus	-0.0559808	0.171506	3420
IDH3B	sitagliptin	0.136134	0.997718	3420
IDH3B	skepinone-L	-0.108111	0.0815349	3420
IDH3B	sorafenib	-0.0920848	0.0312306	3420
IDH3B	sotrastaurin	-0.0376293	0.450057	3420
IDH3B	spautin-1	-0.0553436	0.257516	3420
IDH3B	staurosporine	-0.07792	0.558877	3420
IDH3B	sunitinib	-0.0471301	0.264666	3420
IDH3B	tacedinaline	-0.0249864	0.625792	3420
IDH3B	tacrolimus	-0.0895661	0.0344794	3420
IDH3B	tamatinib	0.0494527	0.548782	3420
IDH3B	tamoxifen	0.0250793	0.750235	3420
IDH3B	tandutinib	-0.0227905	0.64888	3420
IDH3B	tanespimycin	0.00475705	0.944964	3420
IDH3B	temozolomide	-0.0554717	0.382465	3420
IDH3B	temsirolimus	0.00646481	0.935757	3420
IDH3B	teniposide	-0.108389	0.0473959	3420
IDH3B	thalidomide	0.0407738	0.857008	3420
IDH3B	tigecycline	-0.0924166	0.128224	3420
IDH3B	tipifarnib-P1	-0.0392074	0.344234	3420
IDH3B	tipifarnib-P2	-0.0424048	0.483425	3420
IDH3B	tivantinib	-0.11224	0.0511329	3420
IDH3B	tivozanib	-0.0191068	0.738728	3420
IDH3B	topotecan	-0.102342	0.00695829	3420
IDH3B	tosedostat	-0.0148939	0.764373	3420
IDH3B	tozasertib	0.000486861	0.998799	3420
IDH3B	trametinib	0.0617527	0.44189	3420
IDH3B	tretinoin	0.00198601	0.968234	3420
IDH3B	triazolothiadiazine	-0.0942609	0.0124421	3420
IDH3B	trifluoperazine	0.00303352	0.965317	3420
IDH3B	triptolide	-0.0394713	0.341968	3420
IDH3B	tubastatin A	-0.0662285	0.301063	3420
IDH3B	valdecoxib	-0.078518	0.0532151	3420
IDH3B	vandetanib	0.0459681	0.385569	3420
IDH3B	veliparib	-0.0410675	0.61656	3420
IDH3B	vemurafenib	-0.0675142	0.2104	3420
IDH3B	vincristine	-0.0889983	0.0171742	3420
IDH3B	vorapaxar	-0.0433017	0.38213	3420
IDH3B	vorinostat	-0.110869	0.00399128	3420
IDH3B	zebularine	-0.047506	0.252706	3420
MAP3K4	16-beta-bromoandrosterone	-0.139345	0.00211189	4216
MAP3K4	1S,3R-RSL-3	-0.159292	3.8297e-05	4216
MAP3K4	3-Cl-AHPC	-0.262982	1.12955e-12	4216
MAP3K4	968	-0.123478	0.939481	4216
MAP3K4	A-804598	0.0269811	0.890013	4216
MAP3K4	AA-COCF3	-0.169622	2.7578e-05	4216
MAP3K4	ABT-199	-0.194573	0.000183114	4216
MAP3K4	ABT-737	-0.142155	0.000738911	4216
MAP3K4	AC55649	-0.0917751	0.414201	4216
MAP3K4	AGK-2	-0.0625353	0.874136	4216
MAP3K4	AM-580	-0.174801	0.000147498	4216
MAP3K4	AT-406	-0.0668669	0.508663	4216
MAP3K4	parbendazole	-0.353718	1.81478e-23	4216
MAP3K4	AT7867	-0.243259	2.14876e-10	4216
MAP3K4	AZ-3146	-0.183806	3.25359e-06	4216
MAP3K4	AZD1480	-0.126414	0.0611094	4216
MAP3K4	AZD4547	-0.15854	0.000203003	4216
MAP3K4	AZD6482	-0.0642448	0.249945	4216
MAP3K4	AZD7545	-0.0962103	0.0226278	4216
MAP3K4	AZD7762	-0.259303	1.88354e-12	4216
MAP3K4	AZD8055	-0.109331	0.00593163	4216
MAP3K4	B02	-0.235193	1.15734e-09	4216
MAP3K4	BCL-LZH-4	0.0488347	0.831145	4216
MAP3K4	BEC	0.0365317	0.999979	4216
MAP3K4	BI-2536	-0.29863	6.74722e-17	4216
MAP3K4	BIBR-1532	-0.141536	0.000846435	4216
MAP3K4	BIRB-796	-0.103748	0.0182179	4216
MAP3K4	BIX-01294	-0.172493	5.83913e-06	4216
MAP3K4	BMS-195614	-0.0109904	0.893098	4216
MAP3K4	BMS-270394	-0.168236	5.8877e-05	4216
MAP3K4	BMS-345541	-0.204866	8.2618e-08	4216
MAP3K4	BMS-536924	-0.0786051	0.118496	4216
MAP3K4	BMS-754807	-0.109486	0.00988935	4216
MAP3K4	BRD-A02303741	-0.0676594	0.201354	4216
MAP3K4	BRD-A05715709	0.0090446	0.960103	4216
MAP3K4	BRD-A71883111	-0.170834	2.5641e-05	4216
MAP3K4	BRD-A86708339	-0.165914	0.00447898	4216
MAP3K4	BRD-A94377914	-0.268568	3.45886e-07	4216
MAP3K4	BRD-K01737880	-0.253411	0.155401	4216
MAP3K4	BRD-K02251932	-0.068965	0.169916	4216
MAP3K4	BRD-K02492147	0.054167	0.360583	4216
MAP3K4	BRD-K04800985	0.0368075	0.99881	4216
MAP3K4	BRD-K09344309	0.0925551	0.856186	4216
MAP3K4	BRD-K09587429	0.0525658	0.418446	4216
MAP3K4	BRD-K11533227	-0.137071	0.00110798	4216
MAP3K4	BRD-K13999467	-0.148706	0.000267416	4216
MAP3K4	BRD-K14844214	-0.0190847	0.830823	4216
MAP3K4	BRD-K16147474	0.058592	0.89019	4216
MAP3K4	BRD-K17060750	0.0288156	0.606071	4216
MAP3K4	BRD-K19103580	-0.0578552	0.246875	4216
MAP3K4	BRD-K24690302	-0.0692978	0.107769	4216
MAP3K4	BRD-K26531177	-0.206838	1.49591e-07	4216
MAP3K4	BRD-K27224038	-0.212364	0.23344	4216
MAP3K4	BRD-K27986637	-0.0973347	0.516396	4216
MAP3K4	BRD-K28456706	-0.0918697	0.026567	4216
MAP3K4	BRD-K29086754	-0.146112	0.384542	4216
MAP3K4	BRD-K29313308	-0.130972	0.00141527	4216
MAP3K4	BRD-K30019337	-0.170014	0.415795	4216
MAP3K4	BRD-K30748066	-0.208534	0.225874	4216
MAP3K4	BRD-K33199242	0.00330059	0.994611	4216
MAP3K4	BRD-K33514849	0.049283	0.999288	4216
MAP3K4	BRD-K34099515	0.0190731	0.984476	4216
MAP3K4	BRD-K34222889	-0.221535	2.24352e-09	4216
MAP3K4	BRD-K34485477	0.000319837	0.999899	4216
MAP3K4	BRD-K35604418	-0.161019	3.1776e-05	4216
MAP3K4	BRD-K37390332	0.056499	0.742116	4216
MAP3K4	BRD-K41334119	-0.184886	0.719484	4216
MAP3K4	BRD-K41597374	-0.116119	0.00330252	4216
MAP3K4	BRD-K42260513	-0.0392957	0.994633	4216
MAP3K4	BRD-K44224150	-0.026147	0.994823	4216
MAP3K4	BRD-K45681478	-0.00170283	0.975774	4216
MAP3K4	BRD-K48334597	-0.178405	0.082561	4216
MAP3K4	BRD-K48477130	0.0598114	0.771725	4216
MAP3K4	BRD-K49290616	-0.107029	0.753109	4216
MAP3K4	BRD-K50799972	-0.000246309	0.998617	4216
MAP3K4	BRD-K51490254	-0.0933394	0.0261767	4216
MAP3K4	BRD-K51831558	-0.00797233	0.926605	4216
MAP3K4	BRD-K52037352	-0.0491649	0.456794	4216
MAP3K4	BRD-K55116708	-0.135361	0.00141901	4216
MAP3K4	BRD-K61166597	-0.22755	3.70972e-09	4216
MAP3K4	BRD-K63431240	-0.166114	3.7915e-05	4216
MAP3K4	BRD-K64610608	0.0261485	0.843404	4216
MAP3K4	paclitaxel	-0.348084	1.50807e-21	4216
MAP3K4	BRD-K66532283	-0.199163	3.17087e-07	4216
MAP3K4	BRD-K70511574	-0.28887	3.16679e-15	4216
MAP3K4	BRD-K71781559	-0.0270738	0.993922	4216
MAP3K4	BRD-K75293299	-0.0567625	0.840119	4216
MAP3K4	BRD-K78574327	-0.104034	0.948504	4216
MAP3K4	BRD-K80183349	-0.151624	8.7765e-05	4216
MAP3K4	BRD-K84807411	-0.233594	0.297116	4216
MAP3K4	BRD-K85133207	-0.0762533	0.0819207	4216
MAP3K4	BRD-K86535717	-0.055316	0.876774	4216
MAP3K4	BRD-K88742110	-0.0999357	0.0150543	4216
MAP3K4	BRD-K90370028	-0.0712261	0.856252	4216
MAP3K4	BRD-K92856060	-0.0955442	0.0207253	4216
MAP3K4	BRD-K96431673	-0.0843399	0.985799	4216
MAP3K4	BRD-K96970199	-0.14307	0.998764	4216
MAP3K4	BRD-K97651142	-0.0911625	0.0283064	4216
MAP3K4	BRD-K99006945	0.118624	0.0883407	4216
MAP3K4	BRD-M00053801	-0.137169	0.107383	4216
MAP3K4	BRD1378	-0.042789	0.709028	4216
MAP3K4	BRD1812	-0.200056	2.04186e-07	4216
MAP3K4	BRD1835	-0.0673041	0.156725	4216
MAP3K4	BRD4132	-0.112584	0.0585777	4216
MAP3K4	BRD5468	-0.0296208	0.77013	4216
MAP3K4	BRD6340	-0.197574	3.34042e-07	4216
MAP3K4	BRD8899	-0.0371362	0.747748	4216
MAP3K4	BRD8958	0.0192323	0.982654	4216
MAP3K4	BRD9647	-0.129227	0.00482831	4216
MAP3K4	BRD9876	-0.117657	0.0352877	4216
MAP3K4	BYL-719	-0.0935531	0.129392	4216
MAP3K4	Bax channel blocker	-0.0936799	0.032443	4216
MAP3K4	C6-ceramide	-0.0698516	0.493555	4216
MAP3K4	CAL-101	-0.068253	0.228109	4216
MAP3K4	CAY10576	-0.0546594	0.44912	4216
MAP3K4	CAY10594	-0.0352247	0.576963	4216
MAP3K4	CAY10618	-0.24451	5.24541e-11	4216
MAP3K4	CBB-1007	0.083672	0.57601	4216
MAP3K4	CCT036477	-0.138056	0.000340204	4216
MAP3K4	CD-1530	-0.132478	0.00830153	4216
MAP3K4	CD-437	-0.287413	4.62029e-15	4216
MAP3K4	CHIR-99021	-0.223158	1.82221e-08	4216
MAP3K4	CHM-1	-0.299639	1.62908e-16	4216
MAP3K4	CI-976	-0.0416429	0.782569	4216
MAP3K4	CID-5951923	0.0481318	0.578376	4216
MAP3K4	CIL41	-0.118172	0.0754428	4216
MAP3K4	CIL55	-0.124531	0.557658	4216
MAP3K4	CIL55A	-0.172708	0.00271089	4216
MAP3K4	CIL56	-0.155939	0.0075807	4216
MAP3K4	CIL70	-0.0811633	0.172107	4216
MAP3K4	COL-3	-0.160152	0.000371004	4216
MAP3K4	CR-1-31B	-0.252621	3.81484e-12	4216
MAP3K4	Ch-55	-0.202161	1.81136e-06	4216
MAP3K4	Compound 1541A	-0.133202	0.0118486	4216
MAP3K4	Compound 23 citrate	-0.189235	8.1226e-07	4216
MAP3K4	Compound 7d-cis	-0.166227	6.8368e-05	4216
MAP3K4	DBeQ	-0.130797	0.00183529	4216
MAP3K4	DNMDP	0.00712759	0.941842	4216
MAP3K4	ELCPK	-0.269455	1.41874e-06	4216
MAP3K4	ETP-46464	-0.108695	0.0351963	4216
MAP3K4	EX-527	0.0092648	0.953037	4216
MAP3K4	FGIN-1-27	-0.0672966	0.618567	4216
MAP3K4	tivantinib	-0.343472	1.08494e-10	4216
MAP3K4	ceranib-2	-0.342911	8.01902e-22	4216
MAP3K4	FSC231	0.0641275	0.99945	4216
MAP3K4	GANT-61	-0.0777839	0.156109	4216
MAP3K4	GDC-0879	0.0566066	0.297254	4216
MAP3K4	GDC-0941	-0.129292	0.00218551	4216
MAP3K4	GMX-1778	-0.218848	1.16138e-08	4216
MAP3K4	GSK-3 inhibitor IX	-0.146538	0.000329173	4216
MAP3K4	GSK-J4	-0.0418529	0.828453	4216
MAP3K4	GSK1059615	-0.0746619	0.775272	4216
MAP3K4	GSK2636771	0.0614431	0.51584	4216
MAP3K4	GSK4112	-0.0722331	0.131561	4216
MAP3K4	triazolothiadiazine	-0.342257	5.19103e-22	4216
MAP3K4	GSK525762A	-0.183343	8.33234e-07	4216
MAP3K4	GW-405833	-0.168418	8.77406e-06	4216
MAP3K4	GW-843682X	-0.279163	4.12278e-13	4216
MAP3K4	HBX-41108	-0.000498484	0.995605	4216
MAP3K4	HC-067047	-0.0761882	0.182714	4216
MAP3K4	HLI 373	-0.182559	3.54886e-06	4216
MAP3K4	I-BET151	-0.185285	5.33301e-07	4216
MAP3K4	IC-87114	-0.0282538	0.71558	4216
MAP3K4	IPR-456	0.0199425	0.919508	4216
MAP3K4	ISOX	-0.23293	3.49181e-10	4216
MAP3K4	IU1	-0.0514249	0.564739	4216
MAP3K4	JQ-1	-0.194063	1.69531e-07	4216
MAP3K4	JW-480	-0.0453586	0.803272	4216
MAP3K4	JW-55	0.0702744	0.596119	4216
MAP3K4	JW-74	-0.0185509	0.868664	4216
MAP3K4	KH-CB19	-0.0106256	0.940514	4216
MAP3K4	KHS101	-0.155836	0.000129288	4216
MAP3K4	KPT185	-0.290599	1.23306e-11	4216
MAP3K4	KU 0060648	-0.175212	6.52635e-06	4216
MAP3K4	KU-0063794	-0.0875391	0.0316325	4216
MAP3K4	KU-55933	-0.147339	0.000347444	4216
MAP3K4	KU-60019	-0.121548	0.00177574	4216
MAP3K4	KW-2449	-0.259967	1.38431e-12	4216
MAP3K4	LY-2183240	-0.338596	4.87292e-21	4216
MAP3K4	Ki8751	-0.163929	5.7928e-05	4216
MAP3K4	Ko-143	-0.162178	3.0418e-05	4216
MAP3K4	L-685458	-0.11077	0.0371361	4216
MAP3K4	LE-135	-0.226711	5.92018e-08	4216
MAP3K4	LRRK2-IN-1	-0.215921	1.22685e-06	4216
MAP3K4	LY-2157299	0.0599136	0.814536	4216
MAP3K4	vincristine	-0.334735	1.7839e-21	4216
MAP3K4	MG-132	-0.105339	0.192328	4216
MAP3K4	MGCD-265	-0.182293	1.6449e-06	4216
MAP3K4	MI-1	-0.0588693	0.457705	4216
MAP3K4	MI-2	-0.119506	0.0675524	4216
MAP3K4	MK-0752	-0.00187316	0.98396	4216
MAP3K4	MK-1775	-0.269447	5.17912e-13	4216
MAP3K4	MK-2206	-0.0696054	0.111404	4216
MAP3K4	ML006	-0.0997281	0.0517587	4216
MAP3K4	ML029	-0.0629298	0.163201	4216
MAP3K4	ML031	-0.152983	0.000262319	4216
MAP3K4	ML050	-0.133085	0.00121434	4216
MAP3K4	ML083	0.0993734	0.345581	4216
MAP3K4	ML162	-0.173143	1.0173e-05	4216
MAP3K4	ML203	-0.0794784	0.118923	4216
MAP3K4	ML210	-0.146452	0.000220238	4216
MAP3K4	ML239	-0.0779566	0.0666324	4216
MAP3K4	ML258	-0.0556342	0.589105	4216
MAP3K4	docetaxel	-0.334599	1.59542e-09	4216
MAP3K4	ML312	-0.0676864	0.968439	4216
MAP3K4	ML320	-0.127024	0.00333977	4216
MAP3K4	ML334 diastereomer	0.0528772	0.472755	4216
MAP3K4	MLN2238	-0.172058	6.80391e-06	4216
MAP3K4	MLN2480	0.0761958	0.435762	4216
MAP3K4	MST-312	-0.170508	7.33367e-06	4216
MAP3K4	Mdivi-1	-0.151358	0.0001692	4216
MAP3K4	Merck60	-0.251204	7.57957e-12	4216
MAP3K4	N9-isopropylolomoucine	-0.182772	3.63448e-06	4216
MAP3K4	NPC-26	-0.0684099	0.499526	4216
MAP3K4	NSC 74859	-0.112815	0.0184527	4216
MAP3K4	NSC19630	-0.15168	0.00121851	4216
MAP3K4	NSC23766	-0.209543	6.35901e-08	4216
MAP3K4	NSC30930	0.0238696	0.781545	4216
MAP3K4	NSC48300	-0.194644	2.35164e-07	4216
MAP3K4	SNX-2112	-0.330273	4.03494e-20	4216
MAP3K4	NSC95397	-0.200115	4.9826e-07	4216
MAP3K4	NVP-231	-0.283993	1.40522e-14	4216
MAP3K4	NVP-ADW742	-0.113404	0.00740814	4216
MAP3K4	NVP-BEZ235	-0.132891	0.00636419	4216
MAP3K4	NVP-BSK805	-0.197135	2.42104e-07	4216
MAP3K4	NVP-TAE684	-0.119912	0.00594785	4216
MAP3K4	O-6-benzylguanine	-0.0902139	0.447855	4216
MAP3K4	OSI-027	-0.132261	0.00111076	4216
MAP3K4	OSI-930	-0.225834	6.92428e-08	4216
MAP3K4	PAC-1	-0.159958	4.1226e-05	4216
MAP3K4	PD 153035	-0.0236348	0.730297	4216
MAP3K4	PD318088	0.0346544	0.511168	4216
MAP3K4	PDMP	-0.135325	0.000986423	4216
MAP3K4	PF-184	-0.246066	7.20151e-11	4216
MAP3K4	PF-3758309	-0.224945	3.727e-05	4216
MAP3K4	PF-4800567 hydrochloride	-0.060013	0.999586	4216
MAP3K4	PF-543	-0.120258	0.00630117	4216
MAP3K4	PF-573228	-0.217123	9.27143e-09	4216
MAP3K4	PF-750	-0.0877554	0.0582015	4216
MAP3K4	PHA-793887	-0.236036	1.18369e-10	4216
MAP3K4	PI-103	-0.126017	0.00173126	4216
MAP3K4	PIK-93	-0.201992	2.89133e-07	4216
MAP3K4	PL-DI	-0.252607	1.05398e-11	4216
MAP3K4	PLX-4720	0.0187778	0.839147	4216
MAP3K4	PRIMA-1	-0.151437	0.00010037	4216
MAP3K4	PRIMA-1-Met	-0.1894	0.00267099	4216
MAP3K4	PRL-3 inhibitor I	0.0219299	0.89061	4216
MAP3K4	PX-12	-0.242928	5.94475e-11	4216
MAP3K4	PYR-41	-0.0514308	0.339984	4216
MAP3K4	QS-11	-0.0357294	0.910418	4216
MAP3K4	QW-BI-011	-0.202246	0.0168347	4216
MAP3K4	R428	-0.194662	4.0176e-05	4216
MAP3K4	RAF265	-0.116816	0.0212263	4216
MAP3K4	RG-108	-0.140067	0.000711695	4216
MAP3K4	RITA	-0.0879234	0.0342505	4216
MAP3K4	RO4929097	0.0285687	0.737429	4216
MAP3K4	Repligen 136	-0.0927622	0.0296473	4216
MAP3K4	KX2-391	-0.328841	1.81309e-19	4216
MAP3K4	SB-431542	-0.0643543	0.474872	4216
MAP3K4	SB-525334	0.0563615	0.275645	4216
MAP3K4	SB-743921	-0.279675	7.27722e-15	4216
MAP3K4	SCH-529074	-0.0512152	0.292707	4216
MAP3K4	SCH-79797	-0.180768	1.7482e-06	4216
MAP3K4	SGX-523	-0.0293616	0.664648	4216
MAP3K4	SID 26681509	-0.175927	3.1886e-05	4216
MAP3K4	SJ-172550	-0.0199352	0.885621	4216
MAP3K4	SKI-II	-0.168943	4.3212e-05	4216
MAP3K4	SMER-3	-0.147	0.000666979	4216
MAP3K4	SN-38	-0.264491	1.39274e-10	4216
MAP3K4	SNS-032	-0.204228	2.73923e-07	4216
MAP3K4	isoevodiamine	-0.326854	1.76137e-19	4216
MAP3K4	SR-II-138A	-0.267735	9.25487e-14	4216
MAP3K4	SR1001	-0.051169	0.466364	4216
MAP3K4	SR8278	0.203633	0.526918	4216
MAP3K4	SRT-1720	-0.13043	0.00220651	4216
MAP3K4	STF-31	-0.256863	1.4853e-11	4216
MAP3K4	SU11274	-0.17437	8.22605e-06	4216
MAP3K4	SZ4TA2	0.0490985	0.69224	4216
MAP3K4	StemRegenin 1	-0.136373	0.000528948	4216
MAP3K4	TG-100-115	-0.0340591	0.550573	4216
MAP3K4	TG-101348	-0.220142	8.51492e-09	4216
MAP3K4	TGX-221	0.016845	0.864414	4216
MAP3K4	TPCA-1	-0.181705	1.6568e-06	4216
MAP3K4	TW-37	-0.162801	3.612e-05	4216
MAP3K4	UNC0321	-0.0291435	0.818274	4216
MAP3K4	UNC0638	-0.145674	0.000325728	4216
MAP3K4	VAF-347	0.130741	0.0248818	4216
MAP3K4	VER-155008	-0.168263	3.0194e-05	4216
MAP3K4	VU0155056	-0.064529	0.807486	4216
MAP3K4	WAY-362450	-0.0528829	0.998521	4216
MAP3K4	WP1130	-0.198511	2.94835e-07	4216
MAP3K4	WZ4002	-0.083554	0.205356	4216
MAP3K4	WZ8040	-0.160087	0.000501112	4216
MAP3K4	XL765	-0.102637	0.0448214	4216
MAP3K4	nakiterpiosin	-0.325673	4.01356e-19	4216
MAP3K4	YM-155	-0.0892406	0.0549597	4216
MAP3K4	ZSTK474	-0.0815898	0.112409	4216
MAP3K4	abiraterone	0.140612	0.255623	4216
MAP3K4	afatinib	-0.110366	0.013111	4216
MAP3K4	alisertib	-0.275728	8.84341e-14	4216
MAP3K4	alvocidib	-0.253965	4.8048e-06	4216
MAP3K4	apicidin	-0.256881	1.73663e-12	4216
MAP3K4	austocystin D	0.0458026	0.353819	4216
MAP3K4	avicin D	-0.15139	0.0447713	4216
MAP3K4	avrainvillamide	-0.194375	2.5683e-05	4216
MAP3K4	axitinib	-0.261798	1.40067e-12	4216
MAP3K4	azacitidine	-0.10088	0.0289226	4216
MAP3K4	bafilomycin A1	-0.0860293	0.884389	4216
MAP3K4	barasertib	-0.24525	5.4833e-11	4216
MAP3K4	bardoxolone methyl	-0.209853	2.15767e-07	4216
MAP3K4	belinostat	-0.221928	4.1112e-05	4216
MAP3K4	bendamustine	-0.155028	0.000183764	4216
MAP3K4	betulinic acid	-0.0357824	0.83735	4216
MAP3K4	bexarotene	-0.129995	0.00190796	4216
MAP3K4	birinapant	-0.00203351	0.983168	4216
MAP3K4	blebbistatin	-0.0520369	0.946446	4216
MAP3K4	bleomycin A2	-0.183439	7.661e-05	4216
MAP3K4	bortezomib	-0.15985	3.7017e-05	4216
MAP3K4	bosutinib	-0.226779	6.68748e-09	4216
MAP3K4	brefeldin A	-0.0858904	0.0511956	4216
MAP3K4	brivanib	-0.0920678	0.0228631	4216
MAP3K4	cabozantinib	-0.149745	0.000653976	4216
MAP3K4	canertinib	-0.11789	0.0063704	4216
MAP3K4	cediranib	-0.0419894	0.765374	4216
MAP3K4	AT13387	-0.324871	4.86178e-09	4216
MAP3K4	cerulenin	-0.17211	5.59817e-06	4216
MAP3K4	chlorambucil	-0.267565	7.54176e-13	4216
MAP3K4	ciclopirox	-0.220665	1.71923e-09	4216
MAP3K4	ciclosporin	-0.0670655	0.209372	4216
MAP3K4	cimetidine	0.0213625	0.993793	4216
MAP3K4	clofarabine	-0.260856	5.93031e-13	4216
MAP3K4	crizotinib	-0.19249	3.61647e-07	4216
MAP3K4	cucurbitacin I	-0.19322	6.70365e-07	4216
MAP3K4	curcumin	-0.260861	2.06974e-12	4216
MAP3K4	cyanoquinoline 11	-0.0667283	0.453565	4216
MAP3K4	cyclophosphamide	0.0744004	0.993392	4216
MAP3K4	cytarabine hydrochloride	-0.278585	1.76275e-14	4216
MAP3K4	cytochalasin B	-0.179134	6.5143e-05	4216
MAP3K4	dabrafenib	0.047565	0.562076	4216
MAP3K4	dacarbazine	-0.214229	1.37863e-08	4216
MAP3K4	daporinad	-0.249068	1.55091e-09	4216
MAP3K4	darinaparsin	-0.115812	0.0627638	4216
MAP3K4	dasatinib	-0.101309	0.0198093	4216
MAP3K4	decitabine	-0.269938	1.07001e-13	4216
MAP3K4	dexamethasone	-0.079343	0.0605985	4216
MAP3K4	dinaciclib	-0.271848	5.26686e-07	4216
MAP3K4	doxorubicin	-0.321342	1.97618e-19	4216
MAP3K4	FQI-1	-0.320432	6.45781e-10	4216
MAP3K4	elocalcitol	-0.201934	1.12359e-07	4216
MAP3K4	entinostat	-0.165205	1.3726e-05	4216
MAP3K4	epigallocatechin-3-monogallate	-0.145435	0.000644795	4216
MAP3K4	erastin	-0.190794	1.49081e-06	4216
MAP3K4	erismodegib	0.0625599	0.396495	4216
MAP3K4	erlotinib	-0.0512696	0.273225	4216
MAP3K4	etomoxir	-0.00609787	0.997895	4216
MAP3K4	GSK461364	-0.320201	1.53802e-18	4216
MAP3K4	fingolimod	-0.201995	1.27268e-07	4216
MAP3K4	fluorouracil	-0.240352	1.33276e-10	4216
MAP3K4	fluvastatin	-0.147506	0.000975701	4216
MAP3K4	foretinib	-0.186621	2.29848e-06	4216
MAP3K4	fulvestrant	-0.150784	0.601221	4216
MAP3K4	fumonisin B1	-0.152589	0.00127839	4216
MAP3K4	gefitinib	-0.0814718	0.0897128	4216
MAP3K4	BRD-K66453893	-0.318699	2.13165e-18	4216
MAP3K4	gossypol	-0.167276	2.0866e-05	4216
MAP3K4	hyperforin	0.0295917	0.77157	4216
MAP3K4	ibrutinib	-0.110753	0.0408309	4216
MAP3K4	ifosfamide	0.0210965	0.930712	4216
MAP3K4	imatinib	-0.148994	0.000245469	4216
MAP3K4	importazole	-0.1333	0.0169696	4216
MAP3K4	indisulam	-0.242617	1.85829e-10	4216
MAP3K4	neopeltolide	-0.318325	0.000171977	4216
MAP3K4	isoliquiritigenin	-0.163221	0.0525221	4216
MAP3K4	isonicotinohydroxamic acid	-0.0258713	0.992739	4216
MAP3K4	istradefylline	0.0239806	0.90742	4216
MAP3K4	itraconazole	-0.107717	0.0772845	4216
MAP3K4	lapatinib	-0.0918578	0.035008	4216
MAP3K4	lenvatinib	-0.162348	6.4936e-05	4216
MAP3K4	leptomycin B	-0.273865	2.45777e-14	4216
MAP3K4	linifanib	-0.19633	1.78646e-07	4216
MAP3K4	linsitinib	-0.040063	0.383973	4216
MAP3K4	lomeguatrib	-0.0783818	0.141469	4216
MAP3K4	lovastatin	-0.0830021	0.0815236	4216
MAP3K4	manumycin A	-0.235956	1.80098e-10	4216
MAP3K4	marinopyrrole A	-0.144458	0.00369851	4216
MAP3K4	masitinib	-0.193813	8.90672e-07	4216
MAP3K4	methotrexate	-0.178973	7.85934e-06	4216
MAP3K4	methylstat	-0.167661	0.000323116	4216
MAP3K4	mitomycin	-0.237714	1.49271e-10	4216
MAP3K4	momelotinib	-0.263288	1.36776e-11	4216
MAP3K4	myricetin	-0.0211897	0.872752	4216
MAP3K4	myriocin	-0.150299	0.772514	4216
MAP3K4	staurosporine	-0.315951	0.000358171	4216
MAP3K4	narciclasine	-0.282765	2.36545e-14	4216
MAP3K4	navitoclax	-0.10308	0.0125676	4216
MAP3K4	necrostatin-1	-0.0376202	0.453169	4216
MAP3K4	necrostatin-7	-0.0639374	0.161237	4216
MAP3K4	necrosulfonamide	-0.207622	5.88396e-06	4216
MAP3K4	nelarabine	-0.0220066	0.944061	4216
MAP3K4	YK 4-279	-0.314603	3.21242e-18	4216
MAP3K4	neratinib	-0.141601	0.000490407	4216
MAP3K4	neuronal differentiation inducer III	-0.10476	0.00663827	4216
MAP3K4	niclosamide	-0.10586	0.0115361	4216
MAP3K4	nilotinib	-0.107307	0.130108	4216
MAP3K4	nintedanib	-0.231994	7.83038e-07	4216
MAP3K4	nutlin-3	-0.131842	0.000850083	4216
MAP3K4	obatoclax	-0.208811	2.24121e-08	4216
MAP3K4	olaparib	-0.226483	2.1452e-09	4216
MAP3K4	oligomycin A	-0.144175	0.000225864	4216
MAP3K4	omacetaxine mepesuccinate	-0.238041	6.32615e-08	4216
MAP3K4	ouabain	-0.233897	2.46228e-10	4216
MAP3K4	etoposide	-0.313286	5.34759e-18	4216
MAP3K4	palmostatin B	-0.0405319	0.740632	4216
MAP3K4	pandacostat	-0.0424081	0.37689	4216
MAP3K4	panobinostat	-0.240611	4.6644e-11	4216
MAP3K4	FQI-2	-0.31183	4.50263e-18	4216
MAP3K4	parthenolide	-0.044974	0.447055	4216
MAP3K4	pazopanib	-0.203949	8.97465e-08	4216
MAP3K4	pevonedistat	-0.267307	1.82093e-12	4216
MAP3K4	phloretin	-0.134437	0.000525425	4216
MAP3K4	pifithrin-alpha	-0.0833299	0.129071	4216
MAP3K4	pifithrin-mu	-0.145033	0.000182045	4216
MAP3K4	piperlongumine	-0.227484	6.46693e-10	4216
MAP3K4	pitstop2	-0.0201662	0.938354	4216
MAP3K4	pluripotin	-0.17539	4.2443e-05	4216
MAP3K4	procarbazine	0.0542455	0.740047	4216
MAP3K4	prochlorperazine	-0.0595536	0.201504	4216
MAP3K4	purmorphamine	-0.0742215	0.113457	4216
MAP3K4	pyrazolanthrone	-0.154414	0.000502398	4216
MAP3K4	quizartinib	-0.128658	0.0138408	4216
MAP3K4	regorafenib	-0.143213	0.00186423	4216
MAP3K4	rigosertib	-0.294195	2.79874e-15	4216
MAP3K4	ruxolitinib	-0.243931	4.29266e-10	4216
MAP3K4	salermide	-0.118414	0.149862	4216
MAP3K4	saracatinib	-0.095338	0.032179	4216
MAP3K4	selumetinib	0.0593835	0.23021	4216
MAP3K4	semagacestat	-0.0130128	0.943734	4216
MAP3K4	serdemetan	-0.199654	3.13709e-07	4216
MAP3K4	sildenafil	-0.0491507	0.690249	4216
MAP3K4	silmitasertib	-0.120629	0.112059	4216
MAP3K4	simvastatin	-0.0627454	0.272889	4216
MAP3K4	sirolimus	-0.131843	0.000679792	4216
MAP3K4	sitagliptin	-0.0295628	0.997718	4216
MAP3K4	skepinone-L	-0.14996	0.0133947	4216
MAP3K4	sorafenib	-0.112943	0.00734451	4216
MAP3K4	sotrastaurin	-0.152646	0.000880487	4216
MAP3K4	spautin-1	-0.071628	0.135654	4216
MAP3K4	SB-225002	-0.311246	3.62218e-18	4216
MAP3K4	sunitinib	-0.169925	1.1863e-05	4216
MAP3K4	tacedinaline	-0.161693	0.000389911	4216
MAP3K4	tacrolimus	-0.138147	0.000751548	4216
MAP3K4	tamatinib	-0.101562	0.129347	4216
MAP3K4	tamoxifen	-0.0566488	0.383771	4216
MAP3K4	tandutinib	-0.157111	0.000153623	4216
MAP3K4	tanespimycin	-0.0869392	0.0818528	4216
MAP3K4	temozolomide	-0.0904253	0.128336	4216
MAP3K4	temsirolimus	-0.166714	0.00415491	4216
MAP3K4	teniposide	-0.293707	1.09034e-08	4216
MAP3K4	thalidomide	-0.0632241	0.7469	4216
MAP3K4	tigecycline	-0.120293	0.0418479	4216
MAP3K4	tipifarnib-P1	-0.202968	1.21322e-07	4216
MAP3K4	tipifarnib-P2	-0.294763	1.05746e-08	4216
MAP3K4	topotecan	-0.309103	7.09073e-18	4216
MAP3K4	tivozanib	-0.141684	0.00128266	4216
MAP3K4	NSC632839	-0.306841	5.0691e-17	4216
MAP3K4	tosedostat	-0.151629	0.000199186	4216
MAP3K4	tozasertib	-0.116591	0.515443	4216
MAP3K4	trametinib	0.0740097	0.340363	4216
MAP3K4	tretinoin	-0.176366	7.29527e-06	4216
MAP3K4	ML311	-0.303526	3.3989e-17	4216
MAP3K4	trifluoperazine	-0.0762582	0.121448	4216
MAP3K4	triptolide	-0.17547	4.62961e-06	4216
MAP3K4	tubastatin A	-0.181623	0.00166289	4216
MAP3K4	valdecoxib	-0.125915	0.0015141	4216
MAP3K4	vandetanib	-0.0361831	0.514205	4216
MAP3K4	veliparib	-0.0518344	0.50627	4216
MAP3K4	vemurafenib	-0.0199959	0.767524	4216
MAP3K4	gemcitabine	-0.303424	1.67077e-15	4216
MAP3K4	vorapaxar	-0.110709	0.0124078	4216
MAP3K4	vorinostat	-0.227999	9.11499e-10	4216
MAP3K4	zebularine	-0.122353	0.00180103	4216
