# Supplementary material for: A Multi-Omics Analysis of NASH-Related Prognostic Biomarkers Associated with Drug Sensitivity and Immune Infiltration in Hepatocellular Carcinoma
Source: J Clin Med. 2023 Feb 6;12(4):1286. doi: 10.3390/jcm12041286 (PMC9963320; doi:10.3390/jcm12041286)
Supplement: Supplementary file 1 [file jcm-12-01286-s001.zip › Table S7.xlsx]

## Sheet: gene set
cancertype	celltype	estimate	p_value	fdr	alternative	method	statistic
ACC	CD4_naive	-0.176128	0.120501	1	two.sided	Spearman's rank correlation rho	96630.7
ACC	CD8_naive	-0.268044	0.016925	0.37235	two.sided	Spearman's rank correlation rho	104182
ACC	Cytotoxic	0.026778	0.814786	1	two.sided	Spearman's rank correlation rho	79959.9
ACC	Exhausted	0.0149145	0.896205	1	two.sided	Spearman's rank correlation rho	80934.6
ACC	Tr1	-0.0419186	0.713766	1	two.sided	Spearman's rank correlation rho	85604
ACC	nTreg	0.306014	0.00609385	0.146252	two.sided	Spearman's rank correlation rho	57017.9
ACC	iTreg	0.216102	0.0557721	1	two.sided	Spearman's rank correlation rho	64405
ACC	Th1	0.189301	0.0947479	1	two.sided	Spearman's rank correlation rho	66607.1
ACC	Th2	0.083307	0.465441	1	two.sided	Spearman's rank correlation rho	75315.5
ACC	Th17	0.0092636	0.935421	1	two.sided	Spearman's rank correlation rho	81398.9
ACC	Tfh	0.0216236	0.849973	1	two.sided	Spearman's rank correlation rho	80383.4
ACC	Central_memory	-0.0145369	0.898819	1	two.sided	Spearman's rank correlation rho	83354.3
ACC	Effector_memory	0.122742	0.281192	1	two.sided	Spearman's rank correlation rho	72075.5
ACC	NKT	0.13168	0.247359	1	two.sided	Spearman's rank correlation rho	71341.2
ACC	MAIT	0.108393	0.34167	1	two.sided	Spearman's rank correlation rho	73254.4
ACC	DC	0.312987	0.00497767	0.124442	two.sided	Spearman's rank correlation rho	56445
ACC	Bcell	-0.11337	0.319831	1	two.sided	Spearman's rank correlation rho	91474.5
ACC	Monocyte	-0.0825578	0.469477	1	two.sided	Spearman's rank correlation rho	88942.9
ACC	Macrophage	0.274974	0.0141852	0.32626	two.sided	Spearman's rank correlation rho	59568.2
ACC	NK	0.108207	0.342507	1	two.sided	Spearman's rank correlation rho	73269.7
ACC	Neutrophil	-0.0524663	0.64608	1	two.sided	Spearman's rank correlation rho	86470.6
ACC	Gamma_delta	-0.216848	0.0549118	1	two.sided	Spearman's rank correlation rho	99976.2
ACC	CD4_T	-0.24539	0.0292759	0.614794	two.sided	Spearman's rank correlation rho	102321
ACC	CD8_T	-0.0240033	0.833687	1	two.sided	Spearman's rank correlation rho	84132.1
ACC	InfiltrationScore	0.213254	0.0591608	1	two.sided	Spearman's rank correlation rho	64639.1
BLCA	CD4_naive	0.00455054	0.926988	1	two.sided	Spearman's rank correlation rho	1.1268e+07
BLCA	CD8_naive	-0.0698893	0.158809	1	two.sided	Spearman's rank correlation rho	1.21106e+07
BLCA	Cytotoxic	0.0330863	0.505128	1	two.sided	Spearman's rank correlation rho	1.0945e+07
BLCA	Exhausted	0.0125979	0.799732	1	two.sided	Spearman's rank correlation rho	1.11769e+07
BLCA	Tr1	-0.066505	0.180018	1	two.sided	Spearman's rank correlation rho	1.20723e+07
BLCA	nTreg	0.117462	0.0176176	0.281881	two.sided	Spearman's rank correlation rho	9.98987e+06
BLCA	iTreg	0.0626303	0.206795	1	two.sided	Spearman's rank correlation rho	1.06105e+07
BLCA	Th1	0.0931592	0.0601025	0.781333	two.sided	Spearman's rank correlation rho	1.0265e+07
BLCA	Th2	-0.144908	0.00335141	0.0703795	two.sided	Spearman's rank correlation rho	1.29598e+07
BLCA	Th17	-0.0412377	0.406111	1	two.sided	Spearman's rank correlation rho	1.17863e+07
BLCA	Tfh	-0.163149	0.000941248	0.0207075	two.sided	Spearman's rank correlation rho	1.31662e+07
BLCA	Central_memory	-0.0454768	0.35954	1	two.sided	Spearman's rank correlation rho	1.18343e+07
BLCA	Effector_memory	0.134954	0.00633205	0.120309	two.sided	Spearman's rank correlation rho	9.79188e+06
BLCA	NKT	-0.0417182	0.400658	1	two.sided	Spearman's rank correlation rho	1.17917e+07
BLCA	MAIT	0.0272694	0.58285	1	two.sided	Spearman's rank correlation rho	1.10108e+07
BLCA	DC	0.104577	0.0347144	0.520717	two.sided	Spearman's rank correlation rho	1.01357e+07
BLCA	Bcell	-0.120621	0.014775	0.251175	two.sided	Spearman's rank correlation rho	1.26848e+07
BLCA	Monocyte	0.0789295	0.111409	1	two.sided	Spearman's rank correlation rho	1.0426e+07
BLCA	Macrophage	0.0167571	0.735768	1	two.sided	Spearman's rank correlation rho	1.11298e+07
BLCA	NK	-0.139802	0.00466777	0.0933555	two.sided	Spearman's rank correlation rho	1.2902e+07
BLCA	Neutrophil	0.167038	0.000705374	0.016929	two.sided	Spearman's rank correlation rho	9.4287e+06
BLCA	Gamma_delta	-0.166023	0.000760988	0.0175027	two.sided	Spearman's rank correlation rho	1.31988e+07
BLCA	CD4_T	-0.33138	6.50948e-12	1.62737e-10	two.sided	Spearman's rank correlation rho	1.50705e+07
BLCA	CD8_T	-0.125523	0.0111585	0.200852	two.sided	Spearman's rank correlation rho	1.27403e+07
BLCA	InfiltrationScore	-0.0974516	0.0491751	0.688452	two.sided	Spearman's rank correlation rho	1.24226e+07
BRCA	CD4_naive	-0.00848248	0.776937	1	two.sided	Spearman's rank correlation rho	2.34878e+08
BRCA	CD8_naive	-0.0857225	0.00412638	0.0581839	two.sided	Spearman's rank correlation rho	2.52867e+08
BRCA	Cytotoxic	0.0281553	0.346936	1	two.sided	Spearman's rank correlation rho	2.26345e+08
BRCA	Exhausted	0.0395855	0.185955	1	two.sided	Spearman's rank correlation rho	2.23683e+08
BRCA	Tr1	0.11306	0.000151712	0.00288253	two.sided	Spearman's rank correlation rho	2.0657e+08
BRCA	nTreg	0.226109	1.99187e-14	4.97969e-13	two.sided	Spearman's rank correlation rho	1.80241e+08
BRCA	iTreg	0.18439	5.2377e-10	1.25705e-08	two.sided	Spearman's rank correlation rho	1.89957e+08
BRCA	Th1	0.081026	0.00671508	0.087296	two.sided	Spearman's rank correlation rho	2.14031e+08
BRCA	Th2	-0.0347908	0.2451	1	two.sided	Spearman's rank correlation rho	2.41005e+08
BRCA	Th17	-0.0310178	0.300101	1	two.sided	Spearman's rank correlation rho	2.40126e+08
BRCA	Tfh	-0.0665444	0.026082	0.286902	two.sided	Spearman's rank correlation rho	2.48401e+08
BRCA	Central_memory	0.0773205	0.00970098	0.116412	two.sided	Spearman's rank correlation rho	2.14894e+08
BRCA	Effector_memory	0.023698	0.428591	1	two.sided	Spearman's rank correlation rho	2.27383e+08
BRCA	NKT	-0.102575	0.000592607	0.0100743	two.sided	Spearman's rank correlation rho	2.56792e+08
BRCA	MAIT	-0.156287	1.50333e-07	3.30733e-06	two.sided	Spearman's rank correlation rho	2.69302e+08
BRCA	DC	0.166663	2.07464e-08	4.77168e-07	two.sided	Spearman's rank correlation rho	1.94086e+08
BRCA	Bcell	0.148287	6.35205e-07	1.3339e-05	two.sided	Spearman's rank correlation rho	1.98366e+08
BRCA	Monocyte	0.0863033	0.00387893	0.0581839	two.sided	Spearman's rank correlation rho	2.12802e+08
BRCA	Macrophage	0.0234513	0.433416	1	two.sided	Spearman's rank correlation rho	2.2744e+08
BRCA	NK	-0.112408	0.000165714	0.00298286	two.sided	Spearman's rank correlation rho	2.59082e+08
BRCA	Neutrophil	0.0106428	0.722237	1	two.sided	Spearman's rank correlation rho	2.30424e+08
BRCA	Gamma_delta	-0.134781	6.11948e-06	0.00012239	two.sided	Spearman's rank correlation rho	2.64293e+08
BRCA	CD4_T	-0.090366	0.00249183	0.0398693	two.sided	Spearman's rank correlation rho	2.53949e+08
BRCA	CD8_T	-0.0566806	0.0581449	0.581449	two.sided	Spearman's rank correlation rho	2.46103e+08
BRCA	InfiltrationScore	0.02368	0.428943	1	two.sided	Spearman's rank correlation rho	2.27387e+08
CESC	CD4_naive	0.167369	0.00307024	0.053824	two.sided	Spearman's rank correlation rho	4.17424e+06
CESC	CD8_naive	0.194325	0.000568796	0.0119447	two.sided	Spearman's rank correlation rho	4.0391e+06
CESC	Cytotoxic	-0.220498	8.8098e-05	0.00211436	two.sided	Spearman's rank correlation rho	6.11875e+06
CESC	Exhausted	-0.212938	0.000154593	0.00355565	two.sided	Spearman's rank correlation rho	6.08085e+06
CESC	Tr1	-0.0267477	0.638436	1	two.sided	Spearman's rank correlation rho	5.14742e+06
CESC	nTreg	0.127288	0.0247778	0.322112	two.sided	Spearman's rank correlation rho	4.37518e+06
CESC	iTreg	-0.0752323	0.185746	1	two.sided	Spearman's rank correlation rho	5.39048e+06
CESC	Th1	-0.152107	0.00720335	0.100847	two.sided	Spearman's rank correlation rho	5.77588e+06
CESC	Th2	-0.167822	0.00299022	0.053824	two.sided	Spearman's rank correlation rho	5.85467e+06
CESC	Th17	0.0161652	0.776451	1	two.sided	Spearman's rank correlation rho	4.93228e+06
CESC	Tfh	-0.166063	0.00331212	0.053824	two.sided	Spearman's rank correlation rho	5.84585e+06
CESC	Central_memory	-0.0234337	0.680596	1	two.sided	Spearman's rank correlation rho	5.1308e+06
CESC	Effector_memory	0.0620628	0.275214	1	two.sided	Spearman's rank correlation rho	4.70218e+06
CESC	NKT	-0.105492	0.0631604	0.757925	two.sided	Spearman's rank correlation rho	5.54218e+06
CESC	MAIT	0.0805057	0.156683	1	two.sided	Spearman's rank correlation rho	4.60972e+06
CESC	DC	-0.0603993	0.288311	1	two.sided	Spearman's rank correlation rho	5.31612e+06
CESC	Bcell	0.00156758	0.978034	1	two.sided	Spearman's rank correlation rho	5.00546e+06
CESC	Monocyte	0.080983	0.154232	1	two.sided	Spearman's rank correlation rho	4.60733e+06
CESC	Macrophage	-0.0846762	0.136239	1	two.sided	Spearman's rank correlation rho	5.43783e+06
CESC	NK	-0.243163	1.4495e-05	0.000362376	two.sided	Spearman's rank correlation rho	6.23238e+06
CESC	Neutrophil	0.188669	0.000826116	0.0165223	two.sided	Spearman's rank correlation rho	4.06746e+06
CESC	Gamma_delta	-0.0971082	0.0873271	0.960598	two.sided	Spearman's rank correlation rho	5.50015e+06
CESC	CD4_T	-0.160869	0.00445409	0.0668114	two.sided	Spearman's rank correlation rho	5.81981e+06
CESC	CD8_T	-0.185293	0.00102712	0.0195153	two.sided	Spearman's rank correlation rho	5.94225e+06
CESC	InfiltrationScore	-0.200582	0.000371848	0.00818066	two.sided	Spearman's rank correlation rho	6.0189e+06
CHOL	CD4_naive	-0.082837	0.631008	1	two.sided	Spearman's rank correlation rho	8413.64
CHOL	CD8_naive	-0.367645	0.0273896	0.684741	two.sided	Spearman's rank correlation rho	10626.6
CHOL	Cytotoxic	-0.0335929	0.845785	1	two.sided	Spearman's rank correlation rho	8031.02
CHOL	Exhausted	0.0277715	0.872267	1	two.sided	Spearman's rank correlation rho	7554.22
CHOL	Tr1	0.0928406	0.590197	1	two.sided	Spearman's rank correlation rho	7048.63
CHOL	nTreg	0.178038	0.298871	1	two.sided	Spearman's rank correlation rho	6386.64
CHOL	iTreg	0.217279	0.20304	1	two.sided	Spearman's rank correlation rho	6081.74
CHOL	Th1	-0.0212369	0.902156	1	two.sided	Spearman's rank correlation rho	7935.01
CHOL	Th2	-0.270615	0.110414	1	two.sided	Spearman's rank correlation rho	9872.68
CHOL	Th17	-0.0796808	0.644119	1	two.sided	Spearman's rank correlation rho	8389.12
CHOL	Tfh	-0.0895313	0.603569	1	two.sided	Spearman's rank correlation rho	8465.66
CHOL	Central_memory	0.0536347	0.756048	1	two.sided	Spearman's rank correlation rho	7353.26
CHOL	Effector_memory	-0.120145	0.4852	1	two.sided	Spearman's rank correlation rho	8703.53
CHOL	NKT	0.163585	0.340432	1	two.sided	Spearman's rank correlation rho	6498.95
CHOL	MAIT	-0.146159	0.394998	1	two.sided	Spearman's rank correlation rho	8905.66
CHOL	DC	0.0417015	0.80918	1	two.sided	Spearman's rank correlation rho	7445.98
CHOL	Bcell	0.149865	0.382992	1	two.sided	Spearman's rank correlation rho	6605.55
CHOL	Monocyte	-0.185388	0.279035	1	two.sided	Spearman's rank correlation rho	9210.46
CHOL	Macrophage	-0.104261	0.545087	1	two.sided	Spearman's rank correlation rho	8580.1
CHOL	NK	-0.158718	0.355185	1	two.sided	Spearman's rank correlation rho	9003.24
CHOL	Neutrophil	0.00901423	0.958387	1	two.sided	Spearman's rank correlation rho	7699.96
CHOL	Gamma_delta	0.00429321	0.980174	1	two.sided	Spearman's rank correlation rho	7736.64
CHOL	CD4_T	-0.0320649	0.852721	1	two.sided	Spearman's rank correlation rho	8019.14
CHOL	CD8_T	0.0910144	0.59756	1	two.sided	Spearman's rank correlation rho	7062.82
CHOL	InfiltrationScore	-0.178015	0.298934	1	two.sided	Spearman's rank correlation rho	9153.18
COAD	CD4_naive	-0.0216344	0.712765	1	two.sided	Spearman's rank correlation rho	4.23924e+06
COAD	CD8_naive	0.0108473	0.853567	1	two.sided	Spearman's rank correlation rho	4.10446e+06
COAD	Cytotoxic	-0.00957711	0.870553	1	two.sided	Spearman's rank correlation rho	4.18921e+06
COAD	Exhausted	-0.0135184	0.818075	1	two.sided	Spearman's rank correlation rho	4.20556e+06
COAD	Tr1	-0.098228	0.0938605	1	two.sided	Spearman's rank correlation rho	4.55706e+06
COAD	nTreg	0.159736	0.00622967	0.143282	two.sided	Spearman's rank correlation rho	3.48665e+06
COAD	iTreg	-0.0217851	0.710852	1	two.sided	Spearman's rank correlation rho	4.23986e+06
COAD	Th1	0.151259	0.00963828	0.208897	two.sided	Spearman's rank correlation rho	3.52182e+06
COAD	Th2	-0.181141	0.00188477	0.0452345	two.sided	Spearman's rank correlation rho	4.9011e+06
COAD	Th17	0.0452324	0.441293	1	two.sided	Spearman's rank correlation rho	3.96178e+06
COAD	Tfh	-0.0470174	0.423461	1	two.sided	Spearman's rank correlation rho	4.34456e+06
COAD	Central_memory	0.0237188	0.686488	1	two.sided	Spearman's rank correlation rho	4.05105e+06
COAD	Effector_memory	0.0889176	0.129542	1	two.sided	Spearman's rank correlation rho	3.78051e+06
COAD	NKT	0.0403036	0.492692	1	two.sided	Spearman's rank correlation rho	3.98223e+06
COAD	MAIT	0.0628496	0.284428	1	two.sided	Spearman's rank correlation rho	3.88867e+06
COAD	DC	-0.0217375	0.711456	1	two.sided	Spearman's rank correlation rho	4.23966e+06
COAD	Bcell	-0.0369606	0.52929	1	two.sided	Spearman's rank correlation rho	4.30283e+06
COAD	Monocyte	-0.0975699	0.096093	1	two.sided	Spearman's rank correlation rho	4.55433e+06
COAD	Macrophage	-0.133279	0.0227343	0.454687	two.sided	Spearman's rank correlation rho	4.7025e+06
COAD	NK	-0.0374981	0.523315	1	two.sided	Spearman's rank correlation rho	4.30506e+06
COAD	Neutrophil	0.0653303	0.265809	1	two.sided	Spearman's rank correlation rho	3.87838e+06
COAD	Gamma_delta	-0.031723	0.58927	1	two.sided	Spearman's rank correlation rho	4.2811e+06
COAD	CD4_T	-0.203337	0.000471742	0.0117935	two.sided	Spearman's rank correlation rho	4.9932e+06
COAD	CD8_T	-0.0135942	0.817073	1	two.sided	Spearman's rank correlation rho	4.20587e+06
COAD	InfiltrationScore	-0.151556	0.00949534	0.208897	two.sided	Spearman's rank correlation rho	4.77834e+06
DLBC	CD4_naive	-0.0659816	0.655908	1	two.sided	Spearman's rank correlation rho	19639.6
DLBC	CD8_naive	0.0356726	0.809781	1	two.sided	Spearman's rank correlation rho	17766.8
DLBC	Cytotoxic	0.00553726	0.970204	1	two.sided	Spearman's rank correlation rho	18322
DLBC	Exhausted	-0.0907322	0.539673	1	two.sided	Spearman's rank correlation rho	20095.6
DLBC	Tr1	0.0518225	0.726483	1	two.sided	Spearman's rank correlation rho	17469.2
DLBC	nTreg	0.00255192	0.986266	1	two.sided	Spearman's rank correlation rho	18377
DLBC	iTreg	0.0760835	0.607271	1	two.sided	Spearman's rank correlation rho	17022.2
DLBC	Th1	0.3206	0.026308	0.631393	two.sided	Spearman's rank correlation rho	12517.3
DLBC	Th2	-0.0550612	0.710115	1	two.sided	Spearman's rank correlation rho	19438.4
DLBC	Th17	0.238172	0.103068	1	two.sided	Spearman's rank correlation rho	14035.9
DLBC	Tfh	-0.264307	0.0694726	1	two.sided	Spearman's rank correlation rho	23293.6
DLBC	Central_memory	0.0630853	0.670128	1	two.sided	Spearman's rank correlation rho	17261.7
DLBC	Effector_memory	-0.0166306	0.910672	1	two.sided	Spearman's rank correlation rho	18730.4
DLBC	NKT	-0.0424596	0.774462	1	two.sided	Spearman's rank correlation rho	19206.3
DLBC	MAIT	-0.309826	0.0321132	0.738603	two.sided	Spearman's rank correlation rho	24132.2
DLBC	DC	-0.307078	0.0337527	0.74256	two.sided	Spearman's rank correlation rho	24081.6
DLBC	Bcell	0.021768	0.883246	1	two.sided	Spearman's rank correlation rho	18022.9
DLBC	Monocyte	0.0891519	0.546786	1	two.sided	Spearman's rank correlation rho	16781.5
DLBC	Macrophage	0.0990636	0.502926	1	two.sided	Spearman's rank correlation rho	16598.9
DLBC	NK	-0.186971	0.203202	1	two.sided	Spearman's rank correlation rho	21868.7
DLBC	Neutrophil	0.217155	0.138182	1	two.sided	Spearman's rank correlation rho	14423.1
DLBC	Gamma_delta	0.0209029	0.887856	1	two.sided	Spearman's rank correlation rho	18038.9
DLBC	CD4_T	-0.10938	0.459266	1	two.sided	Spearman's rank correlation rho	20439.2
DLBC	CD8_T	-0.378268	0.00802685	0.200671	two.sided	Spearman's rank correlation rho	25393.2
DLBC	InfiltrationScore	-0.215714	0.140881	1	two.sided	Spearman's rank correlation rho	22398.3
ESCA	CD4_naive	-0.124965	0.0883637	1	two.sided	Spearman's rank correlation rho	1.22603e+06
ESCA	CD8_naive	0.054168	0.461542	1	two.sided	Spearman's rank correlation rho	1.0308e+06
ESCA	Cytotoxic	-0.0692981	0.345979	1	two.sided	Spearman's rank correlation rho	1.16536e+06
ESCA	Exhausted	-0.0367946	0.617108	1	two.sided	Spearman's rank correlation rho	1.12994e+06
ESCA	Tr1	-0.275309	0.000137004	0.00342511	two.sided	Spearman's rank correlation rho	1.38988e+06
ESCA	nTreg	0.104707	0.153821	1	two.sided	Spearman's rank correlation rho	975723
ESCA	iTreg	-0.0151095	0.83738	1	two.sided	Spearman's rank correlation rho	1.1063e+06
ESCA	Th1	0.0574314	0.434955	1	two.sided	Spearman's rank correlation rho	1.02725e+06
ESCA	Th2	0.0024045	0.973945	1	two.sided	Spearman's rank correlation rho	1.08722e+06
ESCA	Th17	-0.0294517	0.689059	1	two.sided	Spearman's rank correlation rho	1.12193e+06
ESCA	Tfh	-0.181022	0.013162	0.287149	two.sided	Spearman's rank correlation rho	1.28712e+06
ESCA	Central_memory	-0.125981	0.0857855	1	two.sided	Spearman's rank correlation rho	1.22713e+06
ESCA	Effector_memory	0.261435	0.00030133	0.00723191	two.sided	Spearman's rank correlation rho	804915
ESCA	NKT	-0.0760077	0.301175	1	two.sided	Spearman's rank correlation rho	1.17267e+06
ESCA	MAIT	0.0774781	0.291893	1	two.sided	Spearman's rank correlation rho	1.0054e+06
ESCA	DC	0.00674086	0.927045	1	two.sided	Spearman's rank correlation rho	1.08249e+06
ESCA	Bcell	-0.110622	0.131756	1	two.sided	Spearman's rank correlation rho	1.2104e+06
ESCA	Monocyte	-0.057618	0.433461	1	two.sided	Spearman's rank correlation rho	1.15263e+06
ESCA	Macrophage	-0.079328	0.280489	1	two.sided	Spearman's rank correlation rho	1.17629e+06
ESCA	NK	-0.181236	0.0130522	0.287149	two.sided	Spearman's rank correlation rho	1.28735e+06
ESCA	Neutrophil	0.155749	0.0332907	0.632523	two.sided	Spearman's rank correlation rho	920095
ESCA	Gamma_delta	0.0117571	0.873115	1	two.sided	Spearman's rank correlation rho	1.07702e+06
ESCA	CD4_T	-0.247088	0.000651427	0.0149828	two.sided	Spearman's rank correlation rho	1.35912e+06
ESCA	CD8_T	0.0419994	0.56818	1	two.sided	Spearman's rank correlation rho	1.04406e+06
ESCA	InfiltrationScore	-0.165982	0.0231877	0.463755	two.sided	Spearman's rank correlation rho	1.27073e+06
GBM	CD4_naive	-0.0462934	0.531494	1	two.sided	Spearman's rank correlation rho	1.10409e+06
GBM	CD8_naive	0.238758	0.00106446	0.0223536	two.sided	Spearman's rank correlation rho	803293
GBM	Cytotoxic	-0.107912	0.143716	1	two.sided	Spearman's rank correlation rho	1.16911e+06
GBM	Exhausted	-0.17916	0.0146831	0.264694	two.sided	Spearman's rank correlation rho	1.2443e+06
GBM	Tr1	0.017313	0.81506	1	two.sided	Spearman's rank correlation rho	1.03697e+06
GBM	nTreg	-0.0640827	0.38616	1	two.sided	Spearman's rank correlation rho	1.12286e+06
GBM	iTreg	-0.0496607	0.502033	1	two.sided	Spearman's rank correlation rho	1.10764e+06
GBM	Th1	-0.119627	0.104824	1	two.sided	Spearman's rank correlation rho	1.18147e+06
GBM	Th2	-0.254721	0.000467023	0.0107415	two.sided	Spearman's rank correlation rho	1.32403e+06
GBM	Th17	0.0594123	0.421786	1	two.sided	Spearman's rank correlation rho	992546
GBM	Tfh	-0.207448	0.00460621	0.0921241	two.sided	Spearman's rank correlation rho	1.27415e+06
GBM	Central_memory	0.0104149	0.888106	1	two.sided	Spearman's rank correlation rho	1.04425e+06
GBM	Effector_memory	-0.149585	0.0421303	0.625253	two.sided	Spearman's rank correlation rho	1.21309e+06
GBM	NKT	-0.123872	0.0929761	1	two.sided	Spearman's rank correlation rho	1.18596e+06
GBM	MAIT	-0.279062	0.000119754	0.00287411	two.sided	Spearman's rank correlation rho	1.34972e+06
GBM	DC	-0.149907	0.0416835	0.625253	two.sided	Spearman's rank correlation rho	1.21343e+06
GBM	Bcell	0.128739	0.0807342	0.968811	two.sided	Spearman's rank correlation rho	919390
GBM	Monocyte	0.0345948	0.640149	1	two.sided	Spearman's rank correlation rho	1.01873e+06
GBM	Macrophage	-0.285695	8.08e-05	0.00202	two.sided	Spearman's rank correlation rho	1.35672e+06
GBM	NK	-0.16836	0.0219751	0.351601	two.sided	Spearman's rank correlation rho	1.2329e+06
GBM	Neutrophil	0.180195	0.0141109	0.264694	two.sided	Spearman's rank correlation rho	865091
GBM	Gamma_delta	0.138174	0.0607058	0.789175	two.sided	Spearman's rank correlation rho	909434
GBM	CD4_T	-0.112774	0.126419	1	two.sided	Spearman's rank correlation rho	1.17424e+06
GBM	CD8_T	-0.180527	0.0139313	0.264694	two.sided	Spearman's rank correlation rho	1.24574e+06
GBM	InfiltrationScore	-0.253115	0.000508606	0.0111893	two.sided	Spearman's rank correlation rho	1.32234e+06
HNSC	CD4_naive	0.0759527	0.0818024	0.818024	two.sided	Spearman's rank correlation rho	2.24129e+07
HNSC	CD8_naive	0.0848493	0.0517904	0.621485	two.sided	Spearman's rank correlation rho	2.21971e+07
HNSC	Cytotoxic	-0.0883828	0.0427466	0.555706	two.sided	Spearman's rank correlation rho	2.63989e+07
HNSC	Exhausted	-0.136487	0.00170371	0.0340741	two.sided	Spearman's rank correlation rho	2.75657e+07
HNSC	Tr1	-0.0597344	0.171327	1	two.sided	Spearman's rank correlation rho	2.5704e+07
HNSC	nTreg	0.139324	0.00135816	0.0298795	two.sided	Spearman's rank correlation rho	2.08758e+07
HNSC	iTreg	0.0942685	0.030642	0.428988	two.sided	Spearman's rank correlation rho	2.19687e+07
HNSC	Th1	-0.0382682	0.381083	1	two.sided	Spearman's rank correlation rho	2.51834e+07
HNSC	Th2	-0.113167	0.00938683	0.150189	two.sided	Spearman's rank correlation rho	2.70001e+07
HNSC	Th17	0.00293848	0.946396	1	two.sided	Spearman's rank correlation rho	2.41839e+07
HNSC	Tfh	-0.174216	5.8982e-05	0.00141558	two.sided	Spearman's rank correlation rho	2.84808e+07
HNSC	Central_memory	-0.0993906	0.0226245	0.339367	two.sided	Spearman's rank correlation rho	2.66659e+07
HNSC	Effector_memory	0.0253561	0.56175	1	two.sided	Spearman's rank correlation rho	2.36402e+07
HNSC	NKT	0.148414	0.000638601	0.0146878	two.sided	Spearman's rank correlation rho	2.06554e+07
HNSC	MAIT	0.0706752	0.105429	0.843435	two.sided	Spearman's rank correlation rho	2.25409e+07
HNSC	DC	0.055564	0.203269	1	two.sided	Spearman's rank correlation rho	2.29075e+07
HNSC	Bcell	-0.120217	0.00576965	0.103854	two.sided	Spearman's rank correlation rho	2.71711e+07
HNSC	Monocyte	0.0248624	0.569395	1	two.sided	Spearman's rank correlation rho	2.36521e+07
HNSC	Macrophage	-0.0416695	0.340176	1	two.sided	Spearman's rank correlation rho	2.52659e+07
HNSC	NK	-0.137613	0.00155789	0.0327157	two.sided	Spearman's rank correlation rho	2.7593e+07
HNSC	Neutrophil	0.117923	0.0067783	0.115231	two.sided	Spearman's rank correlation rho	2.13949e+07
HNSC	Gamma_delta	-0.196409	5.67517e-06	0.000141879	two.sided	Spearman's rank correlation rho	2.90191e+07
HNSC	CD4_T	-0.0759517	0.0818065	0.818024	two.sided	Spearman's rank correlation rho	2.60974e+07
HNSC	CD8_T	-0.0785237	0.0719537	0.791491	two.sided	Spearman's rank correlation rho	2.61598e+07
HNSC	InfiltrationScore	-0.122595	0.00486836	0.0924989	two.sided	Spearman's rank correlation rho	2.72287e+07
KICH	CD4_naive	-0.103689	0.407381	1	two.sided	Spearman's rank correlation rho	52872.2
KICH	CD8_naive	-0.0715167	0.568247	1	two.sided	Spearman's rank correlation rho	51331
KICH	Cytotoxic	-0.0785587	0.530666	1	two.sided	Spearman's rank correlation rho	51668.4
KICH	Exhausted	-0.0103181	0.934467	1	two.sided	Spearman's rank correlation rho	48399.3
KICH	Tr1	-0.242903	0.0493921	1	two.sided	Spearman's rank correlation rho	59541.3
KICH	nTreg	-0.00457637	0.970909	1	two.sided	Spearman's rank correlation rho	48124.2
KICH	iTreg	-0.000146165	0.999071	1	two.sided	Spearman's rank correlation rho	47912
KICH	Th1	0.0672074	0.591841	1	two.sided	Spearman's rank correlation rho	44685.4
KICH	Th2	0.189677	0.127163	1	two.sided	Spearman's rank correlation rho	38818.5
KICH	Th17	0.217744	0.0790368	1	two.sided	Spearman's rank correlation rho	37474
KICH	Tfh	-0.0863439	0.490605	1	two.sided	Spearman's rank correlation rho	52041.3
KICH	Central_memory	0.235425	0.0570537	1	two.sided	Spearman's rank correlation rho	36627
KICH	Effector_memory	-0.0104655	0.933533	1	two.sided	Spearman's rank correlation rho	48406.4
KICH	NKT	-0.41387	0.000551663	0.0137916	two.sided	Spearman's rank correlation rho	67731.4
KICH	MAIT	-0.00839275	0.946676	1	two.sided	Spearman's rank correlation rho	48307.1
KICH	DC	-0.0498523	0.690991	1	two.sided	Spearman's rank correlation rho	50293.2
KICH	Bcell	0.0995918	0.426259	1	two.sided	Spearman's rank correlation rho	43134.1
KICH	Monocyte	-0.030253	0.80945	1	two.sided	Spearman's rank correlation rho	49354.3
KICH	Macrophage	0.0251349	0.841225	1	two.sided	Spearman's rank correlation rho	46700.9
KICH	NK	-0.0738607	0.555601	1	two.sided	Spearman's rank correlation rho	51443.3
KICH	Neutrophil	0.19405	0.118469	1	two.sided	Spearman's rank correlation rho	38609
KICH	Gamma_delta	-0.303349	0.0132873	0.318895	two.sided	Spearman's rank correlation rho	62436.9
KICH	CD4_T	-0.104363	0.404319	1	two.sided	Spearman's rank correlation rho	52904.5
KICH	CD8_T	0.0768484	0.539679	1	two.sided	Spearman's rank correlation rho	44223.6
KICH	InfiltrationScore	-0.0259908	0.835892	1	two.sided	Spearman's rank correlation rho	49150.1
KIRC	CD4_naive	0.138316	0.00132642	0.0132642	two.sided	Spearman's rank correlation rho	2.21151e+07
KIRC	CD8_naive	0.00603284	0.889177	1	two.sided	Spearman's rank correlation rho	2.55102e+07
KIRC	Cytotoxic	-0.287117	1.24502e-11	2.49004e-10	two.sided	Spearman's rank correlation rho	3.30339e+07
KIRC	Exhausted	-0.294367	3.55453e-12	7.81997e-11	two.sided	Spearman's rank correlation rho	3.322e+07
KIRC	Tr1	-0.060713	0.160432	1	two.sided	Spearman's rank correlation rho	2.72232e+07
KIRC	nTreg	-0.0154343	0.721453	1	two.sided	Spearman's rank correlation rho	2.60611e+07
KIRC	iTreg	-0.161251	0.000177485	0.00248479	two.sided	Spearman's rank correlation rho	2.98035e+07
KIRC	Th1	-0.293587	4.07484e-12	8.55716e-11	two.sided	Spearman's rank correlation rho	3.31999e+07
KIRC	Th2	0.159281	0.000213329	0.00277328	two.sided	Spearman's rank correlation rho	2.15771e+07
KIRC	Th17	0.276049	7.88166e-11	1.49751e-09	two.sided	Spearman's rank correlation rho	1.85802e+07
KIRC	Tfh	-0.393473	2.71636e-21	6.51926e-20	two.sided	Spearman's rank correlation rho	3.57635e+07
KIRC	Central_memory	0.0261769	0.54536	1	two.sided	Spearman's rank correlation rho	2.49932e+07
KIRC	Effector_memory	0.0913147	0.0345521	0.276416	two.sided	Spearman's rank correlation rho	2.33214e+07
KIRC	NKT	-0.179466	2.9253e-05	0.000468045	two.sided	Spearman's rank correlation rho	3.0271e+07
KIRC	MAIT	-0.14703	0.000638716	0.00766459	two.sided	Spearman's rank correlation rho	2.94385e+07
KIRC	DC	0.142812	0.000914384	0.0100582	two.sided	Spearman's rank correlation rho	2.19998e+07
KIRC	Bcell	0.0225942	0.601713	1	two.sided	Spearman's rank correlation rho	2.50851e+07
KIRC	Monocyte	0.0199752	0.644494	1	two.sided	Spearman's rank correlation rho	2.51524e+07
KIRC	Macrophage	-0.0230445	0.594488	1	two.sided	Spearman's rank correlation rho	2.62565e+07
KIRC	NK	-0.255945	1.83071e-09	3.29527e-08	two.sided	Spearman's rank correlation rho	3.22339e+07
KIRC	Neutrophil	0.38084	6.05621e-20	1.39293e-18	two.sided	Spearman's rank correlation rho	1.58907e+07
KIRC	Gamma_delta	-0.123938	0.00405622	0.0365059	two.sided	Spearman's rank correlation rho	2.88459e+07
KIRC	CD4_T	-0.246439	7.40145e-09	1.25825e-07	two.sided	Spearman's rank correlation rho	3.19899e+07
KIRC	CD8_T	-0.401805	3.25401e-22	8.13504e-21	two.sided	Spearman's rank correlation rho	3.59774e+07
KIRC	InfiltrationScore	-0.162548	0.000157058	0.00235587	two.sided	Spearman's rank correlation rho	2.98368e+07
KIRP	CD4_naive	0.117877	0.0437862	0.518533	two.sided	Spearman's rank correlation rho	3.69808e+06
KIRP	CD8_naive	0.10419	0.0749654	0.60607	two.sided	Spearman's rank correlation rho	3.75545e+06
KIRP	Cytotoxic	-0.1732	0.00293414	0.0528146	two.sided	Spearman's rank correlation rho	4.91834e+06
KIRP	Exhausted	-0.128862	0.0274169	0.383836	two.sided	Spearman's rank correlation rho	4.73246e+06
KIRP	Tr1	-0.154623	0.00801669	0.128267	two.sided	Spearman's rank correlation rho	4.84046e+06
KIRP	nTreg	-0.109915	0.0602312	0.602312	two.sided	Spearman's rank correlation rho	4.65303e+06
KIRP	iTreg	-0.264738	4.33898e-06	8.678e-05	two.sided	Spearman's rank correlation rho	5.30209e+06
KIRP	Th1	-0.0746502	0.20262	1	two.sided	Spearman's rank correlation rho	4.5052e+06
KIRP	Th2	-0.00196876	0.973231	1	two.sided	Spearman's rank correlation rho	4.2005e+06
KIRP	Th17	0.131652	0.0242151	0.363226	two.sided	Spearman's rank correlation rho	3.64033e+06
KIRP	Tfh	-0.308968	6.71125e-08	1.54359e-06	two.sided	Spearman's rank correlation rho	5.48751e+06
KIRP	Central_memory	0.118198	0.0432111	0.518533	two.sided	Spearman's rank correlation rho	3.69673e+06
KIRP	Effector_memory	-0.0699342	0.232703	1	two.sided	Spearman's rank correlation rho	4.48543e+06
KIRP	NKT	-0.227359	8.613e-05	0.00163646	two.sided	Spearman's rank correlation rho	5.14539e+06
KIRP	MAIT	-0.122947	0.0354223	0.460489	two.sided	Spearman's rank correlation rho	4.70767e+06
KIRP	DC	0.107024	0.0673411	0.60607	two.sided	Spearman's rank correlation rho	3.74357e+06
KIRP	Bcell	-0.0658184	0.261424	1	two.sided	Spearman's rank correlation rho	4.46817e+06
KIRP	Monocyte	0.0203475	0.728711	1	two.sided	Spearman's rank correlation rho	4.10694e+06
KIRP	Macrophage	0.0933228	0.110918	0.665507	two.sided	Spearman's rank correlation rho	3.80101e+06
KIRP	NK	-0.380612	1.55528e-11	3.88821e-10	two.sided	Spearman's rank correlation rho	5.78786e+06
KIRP	Neutrophil	0.299779	1.69287e-07	3.72431e-06	two.sided	Spearman's rank correlation rho	2.9355e+06
KIRP	Gamma_delta	-0.105001	0.072716	0.60607	two.sided	Spearman's rank correlation rho	4.63243e+06
KIRP	CD4_T	-0.355749	3.61726e-10	8.68142e-09	two.sided	Spearman's rank correlation rho	5.68363e+06
KIRP	CD8_T	-0.28408	7.64933e-07	1.6064e-05	two.sided	Spearman's rank correlation rho	5.38318e+06
KIRP	InfiltrationScore	-0.157351	0.00696035	0.118326	two.sided	Spearman's rank correlation rho	4.8519e+06
LAML	CD4_naive	0.147777	0.0523466	0.628159	two.sided	Spearman's rank correlation rho	735404
LAML	CD8_naive	0.28941	0.000112473	0.00224945	two.sided	Spearman's rank correlation rho	613185
LAML	Cytotoxic	-0.236882	0.00170163	0.0289278	two.sided	Spearman's rank correlation rho	1.06734e+06
LAML	Exhausted	-0.0938929	0.219172	1	two.sided	Spearman's rank correlation rho	943946
LAML	Tr1	0.0350347	0.647233	1	two.sided	Spearman's rank correlation rho	832692
LAML	nTreg	0.172839	0.022966	0.34449	two.sided	Spearman's rank correlation rho	713777
LAML	iTreg	0.0104689	0.891267	1	two.sided	Spearman's rank correlation rho	853890
LAML	Th1	0.115543	0.130079	1	two.sided	Spearman's rank correlation rho	763219
LAML	Th2	0.119086	0.118634	1	two.sided	Spearman's rank correlation rho	760162
LAML	Th17	-0.0158415	0.836115	1	two.sided	Spearman's rank correlation rho	876594
LAML	Tfh	-0.171873	0.0237532	0.34449	two.sided	Spearman's rank correlation rho	1.01124e+06
LAML	Central_memory	0.434822	2.26156e-09	5.65389e-08	two.sided	Spearman's rank correlation rho	487706
LAML	Effector_memory	0.0175545	0.818684	1	two.sided	Spearman's rank correlation rho	847776
LAML	NKT	-0.261471	0.000511172	0.0092011	two.sided	Spearman's rank correlation rho	1.08855e+06
LAML	MAIT	-0.084592	0.268488	1	two.sided	Spearman's rank correlation rho	935920
LAML	DC	-0.209322	0.0057109	0.0913744	two.sided	Spearman's rank correlation rho	1.04355e+06
LAML	Bcell	0.350507	2.27148e-06	5.2244e-05	two.sided	Spearman's rank correlation rho	560463
LAML	Monocyte	-0.294907	8.1914e-05	0.00172019	two.sided	Spearman's rank correlation rho	1.11741e+06
LAML	Macrophage	-0.319508	1.8285e-05	0.000402264	two.sided	Spearman's rank correlation rho	1.13864e+06
LAML	NK	-0.0247082	0.746938	1	two.sided	Spearman's rank correlation rho	884245
LAML	Neutrophil	-0.272765	0.000282599	0.00536937	two.sided	Spearman's rank correlation rho	1.0983e+06
LAML	Gamma_delta	0.0275931	0.718572	1	two.sided	Spearman's rank correlation rho	839113
LAML	CD4_T	0.0126941	0.868345	1	two.sided	Spearman's rank correlation rho	851970
LAML	CD8_T	0.152591	0.0450456	0.585593	two.sided	Spearman's rank correlation rho	731249
LAML	InfiltrationScore	-0.364538	8.19271e-07	1.9663e-05	two.sided	Spearman's rank correlation rho	1.17749e+06
LGG	CD4_naive	0.0825795	0.0472069	0.803576	two.sided	Spearman's rank correlation rho	2.95256e+07
LGG	CD8_naive	0.0380185	0.361569	1	two.sided	Spearman's rank correlation rho	3.09598e+07
LGG	Cytotoxic	0.0448882	0.281305	1	two.sided	Spearman's rank correlation rho	3.07387e+07
LGG	Exhausted	-0.0627098	0.132102	1	two.sided	Spearman's rank correlation rho	3.42015e+07
LGG	Tr1	0.0864564	0.0377143	0.754286	two.sided	Spearman's rank correlation rho	2.94009e+07
LGG	nTreg	0.0659551	0.113203	1	two.sided	Spearman's rank correlation rho	3.00607e+07
LGG	iTreg	-0.0778589	0.0613944	0.98231	two.sided	Spearman's rank correlation rho	3.46891e+07
LGG	Th1	0.00765232	0.854344	1	two.sided	Spearman's rank correlation rho	3.19371e+07
LGG	Th2	-0.0677192	0.10386	1	two.sided	Spearman's rank correlation rho	3.43628e+07
LGG	Th17	0.174465	2.4678e-05	0.000616956	two.sided	Spearman's rank correlation rho	2.65685e+07
LGG	Tfh	-0.106894	0.0101197	0.232754	two.sided	Spearman's rank correlation rho	3.56235e+07
LGG	Central_memory	-0.0652285	0.117238	1	two.sided	Spearman's rank correlation rho	3.42826e+07
LGG	Effector_memory	-0.00132038	0.974731	1	two.sided	Spearman's rank correlation rho	3.22258e+07
LGG	NKT	-0.0121762	0.7702	1	two.sided	Spearman's rank correlation rho	3.25752e+07
LGG	MAIT	-0.085959	0.0388336	0.754286	two.sided	Spearman's rank correlation rho	3.49498e+07
LGG	DC	-0.0698028	0.0936234	1	two.sided	Spearman's rank correlation rho	3.44298e+07
LGG	Bcell	0.100201	0.0159593	0.335146	two.sided	Spearman's rank correlation rho	2.89585e+07
LGG	Monocyte	0.0340336	0.414107	1	two.sided	Spearman's rank correlation rho	3.1088e+07
LGG	Macrophage	-0.10403	0.0123341	0.271349	two.sided	Spearman's rank correlation rho	3.55314e+07
LGG	NK	0.0669909	0.10764	1	two.sided	Spearman's rank correlation rho	3.00273e+07
LGG	Neutrophil	0.0252158	0.545171	1	two.sided	Spearman's rank correlation rho	3.13718e+07
LGG	Gamma_delta	0.0540368	0.194539	1	two.sided	Spearman's rank correlation rho	3.04442e+07
LGG	CD4_T	-0.150565	0.000280457	0.00673097	two.sided	Spearman's rank correlation rho	3.7029e+07
LGG	CD8_T	-0.0285506	0.493309	1	two.sided	Spearman's rank correlation rho	3.31022e+07
LGG	InfiltrationScore	-0.0835566	0.0446431	0.803576	two.sided	Spearman's rank correlation rho	3.48725e+07
LIHC	CD4_naive	-0.0752029	0.142352	1	two.sided	Spearman's rank correlation rho	9.9891e+06
LIHC	CD8_naive	0.105393	0.0395068	0.948164	two.sided	Spearman's rank correlation rho	8.31129e+06
LIHC	Cytotoxic	-0.0627884	0.220811	1	two.sided	Spearman's rank correlation rho	9.87376e+06
LIHC	Exhausted	0.00670885	0.896017	1	two.sided	Spearman's rank correlation rho	9.2281e+06
LIHC	Tr1	-0.00446981	0.930611	1	two.sided	Spearman's rank correlation rho	9.33196e+06
LIHC	nTreg	0.0993894	0.0522594	1	two.sided	Spearman's rank correlation rho	8.36706e+06
LIHC	iTreg	0.0603305	0.239452	1	two.sided	Spearman's rank correlation rho	8.72993e+06
LIHC	Th1	0.0103929	0.839552	1	two.sided	Spearman's rank correlation rho	9.19388e+06
LIHC	Th2	-0.0512376	0.317889	1	two.sided	Spearman's rank correlation rho	9.76645e+06
LIHC	Th17	0.0329087	0.521353	1	two.sided	Spearman's rank correlation rho	8.98469e+06
LIHC	Tfh	-0.122838	0.0163025	0.407562	two.sided	Spearman's rank correlation rho	1.04316e+07
LIHC	Central_memory	0.0322893	0.529228	1	two.sided	Spearman's rank correlation rho	8.99045e+06
LIHC	Effector_memory	0.0525332	0.305791	1	two.sided	Spearman's rank correlation rho	8.80238e+06
LIHC	NKT	-0.0682998	0.182831	1	two.sided	Spearman's rank correlation rho	9.92497e+06
LIHC	MAIT	-0.0725197	0.157185	1	two.sided	Spearman's rank correlation rho	9.96417e+06
LIHC	DC	0.0394723	0.441744	1	two.sided	Spearman's rank correlation rho	8.92372e+06
LIHC	Bcell	0.0730409	0.154216	1	two.sided	Spearman's rank correlation rho	8.61185e+06
LIHC	Monocyte	-0.0201747	0.694277	1	two.sided	Spearman's rank correlation rho	9.47786e+06
LIHC	Macrophage	-0.0318806	0.534458	1	two.sided	Spearman's rank correlation rho	9.58662e+06
LIHC	NK	-0.105235	0.0398045	0.948164	two.sided	Spearman's rank correlation rho	1.02681e+07
LIHC	Neutrophil	0.0935822	0.0676899	1	two.sided	Spearman's rank correlation rho	8.42101e+06
LIHC	Gamma_delta	-0.0768238	0.133925	1	two.sided	Spearman's rank correlation rho	1.00042e+07
LIHC	CD4_T	-0.104109	0.0419857	0.948164	two.sided	Spearman's rank correlation rho	1.02577e+07
LIHC	CD8_T	-0.0367437	0.473968	1	two.sided	Spearman's rank correlation rho	9.6318e+06
LIHC	InfiltrationScore	-0.056456	0.271034	1	two.sided	Spearman's rank correlation rho	9.81493e+06
LUAD	CD4_naive	0.103306	0.0183408	0.293979	two.sided	Spearman's rank correlation rho	2.11351e+07
LUAD	CD8_naive	0.0359805	0.412465	1	two.sided	Spearman's rank correlation rho	2.2722e+07
LUAD	Cytotoxic	-0.0631533	0.150016	1	two.sided	Spearman's rank correlation rho	2.50586e+07
LUAD	Exhausted	-0.0488032	0.266163	1	two.sided	Spearman's rank correlation rho	2.47203e+07
LUAD	Tr1	-0.0702179	0.109403	1	two.sided	Spearman's rank correlation rho	2.52251e+07
LUAD	nTreg	0.207281	1.82561e-06	4.1989e-05	two.sided	Spearman's rank correlation rho	1.86844e+07
LUAD	iTreg	-0.0275171	0.530856	1	two.sided	Spearman's rank correlation rho	2.42186e+07
LUAD	Th1	0.0388317	0.376397	1	two.sided	Spearman's rank correlation rho	2.26548e+07
LUAD	Th2	-0.100974	0.0211589	0.296224	two.sided	Spearman's rank correlation rho	2.595e+07
LUAD	Th17	0.0502555	0.252179	1	two.sided	Spearman's rank correlation rho	2.23855e+07
LUAD	Tfh	-0.133171	0.00231945	0.0440696	two.sided	Spearman's rank correlation rho	2.67089e+07
LUAD	Central_memory	-0.00920852	0.833911	1	two.sided	Spearman's rank correlation rho	2.37871e+07
LUAD	Effector_memory	0.108598	0.013132	0.236376	two.sided	Spearman's rank correlation rho	2.10104e+07
LUAD	NKT	-0.104254	0.0172929	0.293979	two.sided	Spearman's rank correlation rho	2.60273e+07
LUAD	MAIT	-0.0677836	0.122286	1	two.sided	Spearman's rank correlation rho	2.51677e+07
LUAD	DC	-0.141601	0.00119244	0.0238488	two.sided	Spearman's rank correlation rho	2.69076e+07
LUAD	Bcell	-0.0301183	0.492734	1	two.sided	Spearman's rank correlation rho	2.42799e+07
LUAD	Monocyte	0.0344498	0.432644	1	two.sided	Spearman's rank correlation rho	2.27581e+07
LUAD	Macrophage	-0.168546	0.000110824	0.00232731	two.sided	Spearman's rank correlation rho	2.75427e+07
LUAD	NK	-0.0885591	0.04333	0.56329	two.sided	Spearman's rank correlation rho	2.56574e+07
LUAD	Neutrophil	0.179239	3.8759e-05	0.000852691	two.sided	Spearman's rank correlation rho	1.93454e+07
LUAD	Gamma_delta	0.00895116	0.838488	1	two.sided	Spearman's rank correlation rho	2.33591e+07
LUAD	CD4_T	-0.269334	4.13826e-10	1.03457e-08	two.sided	Spearman's rank correlation rho	2.99182e+07
LUAD	CD8_T	-0.104129	0.0174283	0.293979	two.sided	Spearman's rank correlation rho	2.60244e+07
LUAD	InfiltrationScore	-0.267743	5.28483e-10	1.26836e-08	two.sided	Spearman's rank correlation rho	2.98807e+07
LUSC	CD4_naive	0.124208	0.00527792	0.0580571	two.sided	Spearman's rank correlation rho	1.8576e+07
LUSC	CD8_naive	0.229132	2.04294e-07	4.90305e-06	two.sided	Spearman's rank correlation rho	1.63505e+07
LUSC	Cytotoxic	-0.212613	1.49681e-06	3.293e-05	two.sided	Spearman's rank correlation rho	2.57201e+07
LUSC	Exhausted	-0.196759	8.7728e-06	0.000175456	two.sided	Spearman's rank correlation rho	2.53839e+07
LUSC	Tr1	-0.0308743	0.489641	1	two.sided	Spearman's rank correlation rho	2.18654e+07
LUSC	nTreg	-0.00412027	0.926556	1	two.sided	Spearman's rank correlation rho	2.12979e+07
LUSC	iTreg	-0.0793997	0.0752187	0.60175	two.sided	Spearman's rank correlation rho	2.28946e+07
LUSC	Th1	-0.127355	0.00422534	0.0507041	two.sided	Spearman's rank correlation rho	2.39118e+07
LUSC	Th2	0.0103682	0.816567	1	two.sided	Spearman's rank correlation rho	2.09906e+07
LUSC	Th17	0.0546564	0.221072	1	two.sided	Spearman's rank correlation rho	2.00512e+07
LUSC	Tfh	-0.2279	2.38262e-07	5.48003e-06	two.sided	Spearman's rank correlation rho	2.60444e+07
LUSC	Central_memory	-0.13434	0.00253501	0.0354902	two.sided	Spearman's rank correlation rho	2.40599e+07
LUSC	Effector_memory	0.149494	0.000769941	0.0123191	two.sided	Spearman's rank correlation rho	1.80397e+07
LUSC	NKT	0.03131	0.483531	1	two.sided	Spearman's rank correlation rho	2.05464e+07
LUSC	MAIT	-0.109769	0.0137706	0.137706	two.sided	Spearman's rank correlation rho	2.35388e+07
LUSC	DC	-0.0243656	0.585626	1	two.sided	Spearman's rank correlation rho	2.17273e+07
LUSC	Bcell	0.03573	0.423942	1	two.sided	Spearman's rank correlation rho	2.04527e+07
LUSC	Monocyte	0.197713	7.91796e-06	0.000166277	two.sided	Spearman's rank correlation rho	1.70169e+07
LUSC	Macrophage	-0.131723	0.00307844	0.0400197	two.sided	Spearman's rank correlation rho	2.40044e+07
LUSC	NK	-0.279863	1.66783e-10	4.16957e-09	two.sided	Spearman's rank correlation rho	2.71465e+07
LUSC	Neutrophil	0.186903	2.4582e-05	0.000442474	two.sided	Spearman's rank correlation rho	1.72462e+07
LUSC	Gamma_delta	-0.170196	0.00012525	0.00212925	two.sided	Spearman's rank correlation rho	2.48204e+07
LUSC	CD4_T	-0.109256	0.0142218	0.137706	two.sided	Spearman's rank correlation rho	2.35279e+07
LUSC	CD8_T	-0.137682	0.00196849	0.0295273	two.sided	Spearman's rank correlation rho	2.41308e+07
LUSC	InfiltrationScore	-0.194276	1.1429e-05	0.000217154	two.sided	Spearman's rank correlation rho	2.53312e+07
MESO	CD4_naive	-0.0135776	0.900668	1	two.sided	Spearman's rank correlation rho	111226
MESO	CD8_naive	0.169968	0.115509	1	two.sided	Spearman's rank correlation rho	91084.3
MESO	Cytotoxic	-0.197429	0.0668108	1	two.sided	Spearman's rank correlation rho	131401
MESO	Exhausted	-0.194727	0.0707057	1	two.sided	Spearman's rank correlation rho	131105
MESO	Tr1	0.0980116	0.366449	1	two.sided	Spearman's rank correlation rho	98980.6
MESO	nTreg	0.143868	0.183707	1	two.sided	Spearman's rank correlation rho	93948.5
MESO	iTreg	0.079364	0.464959	1	two.sided	Spearman's rank correlation rho	101027
MESO	Th1	-0.0377587	0.728426	1	two.sided	Spearman's rank correlation rho	113879
MESO	Th2	-0.237429	0.0268064	0.616546	two.sided	Spearman's rank correlation rho	135791
MESO	Th17	0.00269769	0.980216	1	two.sided	Spearman's rank correlation rho	109440
MESO	Tfh	-0.245731	0.0217808	0.52274	two.sided	Spearman's rank correlation rho	136701
MESO	Central_memory	0.0484284	0.656003	1	two.sided	Spearman's rank correlation rho	104422
MESO	Effector_memory	0.0932489	0.390306	1	two.sided	Spearman's rank correlation rho	99503.2
MESO	NKT	0.0968168	0.372348	1	two.sided	Spearman's rank correlation rho	99111.7
MESO	MAIT	-0.0143637	0.894949	1	two.sided	Spearman's rank correlation rho	111312
MESO	DC	0.0830546	0.444391	1	two.sided	Spearman's rank correlation rho	100622
MESO	Bcell	-0.143188	0.185807	1	two.sided	Spearman's rank correlation rho	125449
MESO	Monocyte	0.0452256	0.677448	1	two.sided	Spearman's rank correlation rho	104773
MESO	Macrophage	-0.0318978	0.769297	1	two.sided	Spearman's rank correlation rho	113236
MESO	NK	-0.306555	0.00387863	0.0969656	two.sided	Spearman's rank correlation rho	143376
MESO	Neutrophil	-0.0472022	0.664182	1	two.sided	Spearman's rank correlation rho	114916
MESO	Gamma_delta	-0.131039	0.226359	1	two.sided	Spearman's rank correlation rho	124116
MESO	CD4_T	-0.101426	0.349908	1	two.sided	Spearman's rank correlation rho	120866
MESO	CD8_T	0.0220039	0.839687	1	two.sided	Spearman's rank correlation rho	107321
MESO	InfiltrationScore	-0.211259	0.0495041	1	two.sided	Spearman's rank correlation rho	132919
OV	CD4_naive	-0.00700391	0.901149	1	two.sided	Spearman's rank correlation rho	5.3463e+06
OV	CD8_naive	0.150478	0.00727674	0.152812	two.sided	Spearman's rank correlation rho	4.51021e+06
OV	Cytotoxic	-0.0869696	0.122283	1	two.sided	Spearman's rank correlation rho	5.77085e+06
OV	Exhausted	-0.161895	0.00385041	0.0847091	two.sided	Spearman's rank correlation rho	6.16864e+06
OV	Tr1	0.0599833	0.287006	1	two.sided	Spearman's rank correlation rho	4.99066e+06
OV	nTreg	-0.0512962	0.362668	1	two.sided	Spearman's rank correlation rho	5.58145e+06
OV	iTreg	-0.0317112	0.573766	1	two.sided	Spearman's rank correlation rho	5.47747e+06
OV	Th1	-0.0657279	0.243254	1	two.sided	Spearman's rank correlation rho	5.65807e+06
OV	Th2	-0.0646316	0.251222	1	two.sided	Spearman's rank correlation rho	5.65225e+06
OV	Th17	0.108687	0.0532107	0.851371	two.sided	Spearman's rank correlation rho	4.73208e+06
OV	Tfh	-0.139662	0.01281	0.230581	two.sided	Spearman's rank correlation rho	6.0506e+06
OV	Central_memory	-0.142053	0.0113402	0.215465	two.sided	Spearman's rank correlation rho	6.06329e+06
OV	Effector_memory	0.089366	0.112284	1	two.sided	Spearman's rank correlation rho	4.83466e+06
OV	NKT	-0.184485	0.000966652	0.022233	two.sided	Spearman's rank correlation rho	6.28857e+06
OV	MAIT	-0.223501	5.9573e-05	0.00148931	two.sided	Spearman's rank correlation rho	6.49571e+06
OV	DC	-0.0851437	0.130356	1	two.sided	Spearman's rank correlation rho	5.76115e+06
OV	Bcell	0.202882	0.000277099	0.00665038	two.sided	Spearman's rank correlation rho	4.23199e+06
OV	Monocyte	-0.0854444	0.128999	1	two.sided	Spearman's rank correlation rho	5.76275e+06
OV	Macrophage	-0.0505753	0.36946	1	two.sided	Spearman's rank correlation rho	5.57763e+06
OV	NK	-0.0886812	0.115074	1	two.sided	Spearman's rank correlation rho	5.77993e+06
OV	Neutrophil	0.128932	0.0216704	0.368397	two.sided	Spearman's rank correlation rho	4.6246e+06
OV	Gamma_delta	-0.0521682	0.354555	1	two.sided	Spearman's rank correlation rho	5.58608e+06
OV	CD4_T	0.0324451	0.564927	1	two.sided	Spearman's rank correlation rho	5.13686e+06
OV	CD8_T	-0.143769	0.0103784	0.207569	two.sided	Spearman's rank correlation rho	6.0724e+06
OV	InfiltrationScore	-0.0736466	0.190929	1	two.sided	Spearman's rank correlation rho	5.70011e+06
PAAD	CD4_naive	0.014973	0.841437	1	two.sided	Spearman's rank correlation rho	973463
PAAD	CD8_naive	0.143136	0.0545716	1	two.sided	Spearman's rank correlation rho	846804
PAAD	Cytotoxic	0.065957	0.377683	1	two.sided	Spearman's rank correlation rho	923077
PAAD	Exhausted	0.0995044	0.18262	1	two.sided	Spearman's rank correlation rho	889924
PAAD	Tr1	0.17921	0.0157829	0.363006	two.sided	Spearman's rank correlation rho	811154
PAAD	nTreg	-0.039977	0.593118	1	two.sided	Spearman's rank correlation rho	1.02777e+06
PAAD	iTreg	0.161395	0.0299649	0.659227	two.sided	Spearman's rank correlation rho	828760
PAAD	Th1	-0.0395562	0.597017	1	two.sided	Spearman's rank correlation rho	1.02735e+06
PAAD	Th2	0.00167916	0.982101	1	two.sided	Spearman's rank correlation rho	986601
PAAD	Th17	-0.246487	0.000823043	0.0205761	two.sided	Spearman's rank correlation rho	1.23185e+06
PAAD	Tfh	0.00356597	0.962001	1	two.sided	Spearman's rank correlation rho	984736
PAAD	Central_memory	0.0884955	0.236151	1	two.sided	Spearman's rank correlation rho	900803
PAAD	Effector_memory	-0.109204	0.14336	1	two.sided	Spearman's rank correlation rho	1.09618e+06
PAAD	NKT	-0.22989	0.00185052	0.0444125	two.sided	Spearman's rank correlation rho	1.21545e+06
PAAD	MAIT	-0.0718171	0.336679	1	two.sided	Spearman's rank correlation rho	1.05923e+06
PAAD	DC	-0.0142797	0.848688	1	two.sided	Spearman's rank correlation rho	1.00237e+06
PAAD	Bcell	0.104958	0.159675	1	two.sided	Spearman's rank correlation rho	884534
PAAD	Monocyte	-0.026516	0.723094	1	two.sided	Spearman's rank correlation rho	1.01446e+06
PAAD	Macrophage	0.0365225	0.625466	1	two.sided	Spearman's rank correlation rho	952166
PAAD	NK	-0.0241041	0.747386	1	two.sided	Spearman's rank correlation rho	1.01208e+06
PAAD	Neutrophil	-0.0967864	0.194923	1	two.sided	Spearman's rank correlation rho	1.08391e+06
PAAD	Gamma_delta	-0.0138806	0.852868	1	two.sided	Spearman's rank correlation rho	1.00198e+06
PAAD	CD4_T	0.0318004	0.670856	1	two.sided	Spearman's rank correlation rho	956833
PAAD	CD8_T	-0.000816639	0.991295	1	two.sided	Spearman's rank correlation rho	989067
PAAD	InfiltrationScore	0.0113083	0.879906	1	two.sided	Spearman's rank correlation rho	977085
PCPG	CD4_naive	0.0995924	0.164884	1	two.sided	Spearman's rank correlation rho	1.12991e+06
PCPG	CD8_naive	-0.183465	0.010054	0.211134	two.sided	Spearman's rank correlation rho	1.48512e+06
PCPG	Cytotoxic	-0.0540589	0.45173	1	two.sided	Spearman's rank correlation rho	1.32273e+06
PCPG	Exhausted	-0.0114292	0.873677	1	two.sided	Spearman's rank correlation rho	1.26923e+06
PCPG	Tr1	0.114223	0.110911	1	two.sided	Spearman's rank correlation rho	1.11155e+06
PCPG	nTreg	0.192931	0.00674339	0.148355	two.sided	Spearman's rank correlation rho	1.01278e+06
PCPG	iTreg	0.0376358	0.600475	1	two.sided	Spearman's rank correlation rho	1.20766e+06
PCPG	Th1	0.154694	0.0303943	0.563649	two.sided	Spearman's rank correlation rho	1.06077e+06
PCPG	Th2	-0.0948205	0.186176	1	two.sided	Spearman's rank correlation rho	1.37388e+06
PCPG	Th17	-0.0814974	0.256143	1	two.sided	Spearman's rank correlation rho	1.35716e+06
PCPG	Tfh	-0.106876	0.135969	1	two.sided	Spearman's rank correlation rho	1.38901e+06
PCPG	Central_memory	0.400997	5.73448e-09	1.43362e-07	two.sided	Spearman's rank correlation rho	751683
PCPG	Effector_memory	0.0921538	0.198919	1	two.sided	Spearman's rank correlation rho	1.13925e+06
PCPG	NKT	-0.161751	0.0235146	0.470293	two.sided	Spearman's rank correlation rho	1.45787e+06
PCPG	MAIT	-0.297245	2.3283e-05	0.000558792	two.sided	Spearman's rank correlation rho	1.6279e+06
PCPG	DC	0.0312005	0.664202	1	two.sided	Spearman's rank correlation rho	1.21574e+06
PCPG	Bcell	0.155373	0.0296657	0.563649	two.sided	Spearman's rank correlation rho	1.05991e+06
PCPG	Monocyte	-0.13409	0.0609684	1	two.sided	Spearman's rank correlation rho	1.42316e+06
PCPG	Macrophage	-0.0228414	0.750655	1	two.sided	Spearman's rank correlation rho	1.28355e+06
PCPG	NK	-0.231012	0.00112336	0.0258372	two.sided	Spearman's rank correlation rho	1.54478e+06
PCPG	Neutrophil	0.0733271	0.307071	1	two.sided	Spearman's rank correlation rho	1.16287e+06
PCPG	Gamma_delta	-0.0420531	0.558388	1	two.sided	Spearman's rank correlation rho	1.30766e+06
PCPG	CD4_T	0.0263568	0.713844	1	two.sided	Spearman's rank correlation rho	1.22182e+06
PCPG	CD8_T	-0.0421022	0.557929	1	two.sided	Spearman's rank correlation rho	1.30772e+06
PCPG	InfiltrationScore	-0.104919	0.143326	1	two.sided	Spearman's rank correlation rho	1.38655e+06
PRAD	CD4_naive	0.152667	0.000614112	0.0135105	two.sided	Spearman's rank correlation rho	1.76527e+07
PRAD	CD8_naive	0.0823931	0.0656385	0.787662	two.sided	Spearman's rank correlation rho	1.91167e+07
PRAD	Cytotoxic	-0.152242	0.000636315	0.0135105	two.sided	Spearman's rank correlation rho	2.40049e+07
PRAD	Exhausted	-0.0345421	0.440896	1	two.sided	Spearman's rank correlation rho	2.15529e+07
PRAD	Tr1	-0.00629883	0.888269	1	two.sided	Spearman's rank correlation rho	2.09645e+07
PRAD	nTreg	0.111846	0.0123305	0.221948	two.sided	Spearman's rank correlation rho	1.85031e+07
PRAD	iTreg	-0.0021823	0.961178	1	two.sided	Spearman's rank correlation rho	2.08787e+07
PRAD	Th1	-0.0628929	0.16026	1	two.sided	Spearman's rank correlation rho	2.21435e+07
PRAD	Th2	-0.0611921	0.171891	1	two.sided	Spearman's rank correlation rho	2.21081e+07
PRAD	Th17	0.0949177	0.0338458	0.473842	two.sided	Spearman's rank correlation rho	1.88558e+07
PRAD	Tfh	-0.138967	0.00184109	0.0368218	two.sided	Spearman's rank correlation rho	2.37284e+07
PRAD	Central_memory	0.0198172	0.658445	1	two.sided	Spearman's rank correlation rho	2.04204e+07
PRAD	Effector_memory	0.106467	0.017243	0.275888	two.sided	Spearman's rank correlation rho	1.86152e+07
PRAD	NKT	-0.205064	3.7801e-06	8.6942e-05	two.sided	Spearman's rank correlation rho	2.51054e+07
PRAD	MAIT	-0.0694556	0.120887	1	two.sided	Spearman's rank correlation rho	2.22802e+07
PRAD	DC	-0.0927471	0.0381566	0.496036	two.sided	Spearman's rank correlation rho	2.27655e+07
PRAD	Bcell	0.0223578	0.617957	1	two.sided	Spearman's rank correlation rho	2.03675e+07
PRAD	Monocyte	-0.00617628	0.890429	1	two.sided	Spearman's rank correlation rho	2.09619e+07
PRAD	Macrophage	-0.0589976	0.187815	1	two.sided	Spearman's rank correlation rho	2.20624e+07
PRAD	NK	-0.215319	1.17537e-06	2.8209e-05	two.sided	Spearman's rank correlation rho	2.5319e+07
PRAD	Neutrophil	0.11046	0.0134608	0.228833	two.sided	Spearman's rank correlation rho	1.8532e+07
PRAD	Gamma_delta	-0.101286	0.023514	0.352711	two.sided	Spearman's rank correlation rho	2.29434e+07
PRAD	CD4_T	-0.138232	0.00194755	0.0370034	two.sided	Spearman's rank correlation rho	2.37131e+07
PRAD	CD8_T	-0.00154701	0.972474	1	two.sided	Spearman's rank correlation rho	2.08655e+07
PRAD	InfiltrationScore	-0.219379	7.28338e-07	1.8208e-05	two.sided	Spearman's rank correlation rho	2.54036e+07
READ	CD4_naive	-0.0510314	0.619606	1	two.sided	Spearman's rank correlation rho	159858
READ	CD8_naive	-0.0237765	0.817184	1	two.sided	Spearman's rank correlation rho	155712
READ	Cytotoxic	-0.165799	0.104585	1	two.sided	Spearman's rank correlation rho	177313
READ	Exhausted	0.0830511	0.418657	1	two.sided	Spearman's rank correlation rho	139464
READ	Tr1	0.0316444	0.758312	1	two.sided	Spearman's rank correlation rho	147283
READ	nTreg	0.158225	0.121645	1	two.sided	Spearman's rank correlation rho	128031
READ	iTreg	0.0259265	0.800981	1	two.sided	Spearman's rank correlation rho	148153
READ	Th1	0.245435	0.0153887	0.384719	two.sided	Spearman's rank correlation rho	114766
READ	Th2	-0.114391	0.264559	1	two.sided	Spearman's rank correlation rho	169494
READ	Th17	-0.1901	0.0621758	1	two.sided	Spearman's rank correlation rho	181009
READ	Tfh	-0.0760443	0.45911	1	two.sided	Spearman's rank correlation rho	163662
READ	Central_memory	0.0384363	0.708565	1	two.sided	Spearman's rank correlation rho	146250
READ	Effector_memory	0.0413195	0.687797	1	two.sided	Spearman's rank correlation rho	145811
READ	NKT	0.118748	0.246669	1	two.sided	Spearman's rank correlation rho	134035
READ	MAIT	0.128952	0.208093	1	two.sided	Spearman's rank correlation rho	132483
READ	DC	-0.134555	0.188842	1	two.sided	Spearman's rank correlation rho	172561
READ	Bcell	0.100253	0.328551	1	two.sided	Spearman's rank correlation rho	136848
READ	Monocyte	-0.0760462	0.459099	1	two.sided	Spearman's rank correlation rho	163662
READ	Macrophage	-0.16281	0.11108	1	two.sided	Spearman's rank correlation rho	176859
READ	NK	-0.0411934	0.688701	1	two.sided	Spearman's rank correlation rho	158361
READ	Neutrophil	0.162425	0.111939	1	two.sided	Spearman's rank correlation rho	127392
READ	Gamma_delta	-0.200316	0.0491493	1	two.sided	Spearman's rank correlation rho	182563
READ	CD4_T	-0.105101	0.305578	1	two.sided	Spearman's rank correlation rho	168081
READ	CD8_T	-0.102924	0.315758	1	two.sided	Spearman's rank correlation rho	167750
READ	InfiltrationScore	-0.125141	0.221964	1	two.sided	Spearman's rank correlation rho	171129
SARC	CD4_naive	0.13349	0.0280056	0.5041	two.sided	Spearman's rank correlation rho	2.87425e+06
SARC	CD8_naive	0.0734538	0.22811	1	two.sided	Spearman's rank correlation rho	3.07339e+06
SARC	Cytotoxic	-0.136735	0.0243784	0.463189	two.sided	Spearman's rank correlation rho	3.77059e+06
SARC	Exhausted	-0.101671	0.0948565	1	two.sided	Spearman's rank correlation rho	3.65429e+06
SARC	Tr1	0.0117671	0.847098	1	two.sided	Spearman's rank correlation rho	3.27801e+06
SARC	nTreg	-0.0276421	0.650527	1	two.sided	Spearman's rank correlation rho	3.40873e+06
SARC	iTreg	-0.228807	0.000144839	0.00362099	two.sided	Spearman's rank correlation rho	4.076e+06
SARC	Th1	-0.0886077	0.145728	1	two.sided	Spearman's rank correlation rho	3.61096e+06
SARC	Th2	0.190645	0.00161674	0.0371849	two.sided	Spearman's rank correlation rho	2.68466e+06
SARC	Th17	-0.0433868	0.476916	1	two.sided	Spearman's rank correlation rho	3.46096e+06
SARC	Tfh	-0.173756	0.00411743	0.0864659	two.sided	Spearman's rank correlation rho	3.8934e+06
SARC	Central_memory	-0.0341103	0.576098	1	two.sided	Spearman's rank correlation rho	3.43019e+06
SARC	Effector_memory	0.14943	0.0138011	0.276022	two.sided	Spearman's rank correlation rho	2.82137e+06
SARC	NKT	-0.0707295	0.245875	1	two.sided	Spearman's rank correlation rho	3.55165e+06
SARC	MAIT	0.0148279	0.808018	1	two.sided	Spearman's rank correlation rho	3.26786e+06
SARC	DC	-0.0804576	0.186662	1	two.sided	Spearman's rank correlation rho	3.58392e+06
SARC	Bcell	0.0844068	0.165881	1	two.sided	Spearman's rank correlation rho	3.03706e+06
SARC	Monocyte	-0.0451652	0.459024	1	two.sided	Spearman's rank correlation rho	3.46685e+06
SARC	Macrophage	-0.181872	0.00265354	0.0583778	two.sided	Spearman's rank correlation rho	3.92032e+06
SARC	NK	-0.113943	0.0610436	1	two.sided	Spearman's rank correlation rho	3.69499e+06
SARC	Neutrophil	0.110872	0.0683997	1	two.sided	Spearman's rank correlation rho	2.94927e+06
SARC	Gamma_delta	-0.0694424	0.254596	1	two.sided	Spearman's rank correlation rho	3.54738e+06
SARC	CD4_T	-0.0711785	0.242883	1	two.sided	Spearman's rank correlation rho	3.55314e+06
SARC	CD8_T	-0.107252	0.0779821	1	two.sided	Spearman's rank correlation rho	3.6728e+06
SARC	InfiltrationScore	-0.206868	0.000610576	0.0146538	two.sided	Spearman's rank correlation rho	4.00323e+06
SKCM	CD4_naive	0.202324	8.09186e-06	0.000169929	two.sided	Spearman's rank correlation rho	1.4611e+07
SKCM	CD8_naive	0.0706514	0.122547	1	two.sided	Spearman's rank correlation rho	1.70228e+07
SKCM	Cytotoxic	-0.146854	0.00126791	0.0240903	two.sided	Spearman's rank correlation rho	2.10069e+07
SKCM	Exhausted	-0.217636	1.52061e-06	3.6495e-05	two.sided	Spearman's rank correlation rho	2.23034e+07
SKCM	Tr1	0.0759753	0.0967422	1	two.sided	Spearman's rank correlation rho	1.69253e+07
SKCM	nTreg	0.0354963	0.438288	1	two.sided	Spearman's rank correlation rho	1.76668e+07
SKCM	iTreg	0.0554749	0.225555	1	two.sided	Spearman's rank correlation rho	1.73008e+07
SKCM	Th1	-0.108957	0.0170551	0.255827	two.sided	Spearman's rank correlation rho	2.03127e+07
SKCM	Th2	-0.0782519	0.0871225	1	two.sided	Spearman's rank correlation rho	1.97503e+07
SKCM	Th17	0.020992	0.646749	1	two.sided	Spearman's rank correlation rho	1.79325e+07
SKCM	Tfh	-0.122256	0.00738961	0.133013	two.sided	Spearman's rank correlation rho	2.05563e+07
SKCM	Central_memory	0.0548878	0.230511	1	two.sided	Spearman's rank correlation rho	1.73116e+07
SKCM	Effector_memory	-0.0513729	0.261797	1	two.sided	Spearman's rank correlation rho	1.9258e+07
SKCM	NKT	0.0510672	0.26465	1	two.sided	Spearman's rank correlation rho	1.73816e+07
SKCM	MAIT	-0.0564511	0.217483	1	two.sided	Spearman's rank correlation rho	1.9351e+07
SKCM	DC	0.0259562	0.570924	1	two.sided	Spearman's rank correlation rho	1.78415e+07
SKCM	Bcell	0.0399138	0.383415	1	two.sided	Spearman's rank correlation rho	1.75859e+07
SKCM	Monocyte	0.211412	3.04511e-06	7.0038e-05	two.sided	Spearman's rank correlation rho	1.44445e+07
SKCM	Macrophage	-0.0173031	0.705627	1	two.sided	Spearman's rank correlation rho	1.86339e+07
SKCM	NK	-0.220836	1.05557e-06	2.6389e-05	two.sided	Spearman's rank correlation rho	2.2362e+07
SKCM	Neutrophil	0.117483	0.0100696	0.171183	two.sided	Spearman's rank correlation rho	1.6165e+07
SKCM	Gamma_delta	-0.196047	1.5498e-05	0.000309962	two.sided	Spearman's rank correlation rho	2.19079e+07
SKCM	CD4_T	-0.0663436	0.147113	1	two.sided	Spearman's rank correlation rho	1.95322e+07
SKCM	CD8_T	-0.204798	6.22826e-06	0.000137022	two.sided	Spearman's rank correlation rho	2.20682e+07
SKCM	InfiltrationScore	-0.110884	0.0151839	0.242943	two.sided	Spearman's rank correlation rho	2.0348e+07
STAD	CD4_naive	-0.00966531	0.844369	1	two.sided	Spearman's rank correlation rho	1.20273e+07
STAD	CD8_naive	0.04534	0.356876	1	two.sided	Spearman's rank correlation rho	1.13721e+07
STAD	Cytotoxic	-0.0661557	0.178592	1	two.sided	Spearman's rank correlation rho	1.27002e+07
STAD	Exhausted	0.129213	0.00840413	0.0924455	two.sided	Spearman's rank correlation rho	1.0373e+07
STAD	Tr1	-0.189727	0.000100758	0.00151137	two.sided	Spearman's rank correlation rho	1.41722e+07
STAD	nTreg	0.372373	4.26437e-15	1.06609e-13	two.sided	Spearman's rank correlation rho	7.4764e+06
STAD	iTreg	-0.0453056	0.357241	1	two.sided	Spearman's rank correlation rho	1.24518e+07
STAD	Th1	0.165797	0.00069678	0.00905814	two.sided	Spearman's rank correlation rho	9.93716e+06
STAD	Th2	-0.233134	1.57637e-06	3.3104e-05	two.sided	Spearman's rank correlation rho	1.46893e+07
STAD	Th17	-0.0176656	0.719731	1	two.sided	Spearman's rank correlation rho	1.21226e+07
STAD	Tfh	-0.27364	1.46032e-08	3.2127e-07	two.sided	Spearman's rank correlation rho	1.51718e+07
STAD	Central_memory	-0.00178912	0.971013	1	two.sided	Spearman's rank correlation rho	1.19335e+07
STAD	Effector_memory	0.228836	2.47323e-06	4.6991e-05	two.sided	Spearman's rank correlation rho	9.18623e+06
STAD	NKT	-0.193832	7.0526e-05	0.00119894	two.sided	Spearman's rank correlation rho	1.42211e+07
STAD	MAIT	-0.139501	0.00441048	0.0529258	two.sided	Spearman's rank correlation rho	1.35739e+07
STAD	DC	0.079012	0.107998	0.843209	two.sided	Spearman's rank correlation rho	1.0971e+07
STAD	Bcell	-0.192536	7.8995e-05	0.00126392	two.sided	Spearman's rank correlation rho	1.42057e+07
STAD	Monocyte	0.079598	0.105401	0.843209	two.sided	Spearman's rank correlation rho	1.0964e+07
STAD	Macrophage	-0.100962	0.0398008	0.358207	two.sided	Spearman's rank correlation rho	1.31148e+07
STAD	NK	-0.230121	2.16368e-06	4.3274e-05	two.sided	Spearman's rank correlation rho	1.46534e+07
STAD	Neutrophil	0.339248	1.23098e-12	2.83125e-11	two.sided	Spearman's rank correlation rho	7.87099e+06
STAD	Gamma_delta	-0.169604	0.000520741	0.00729038	two.sided	Spearman's rank correlation rho	1.39325e+07
STAD	CD4_T	-0.341567	8.45669e-13	2.02961e-11	two.sided	Spearman's rank correlation rho	1.5981e+07
STAD	CD8_T	-0.105845	0.0311003	0.311003	two.sided	Spearman's rank correlation rho	1.3173e+07
STAD	InfiltrationScore	-0.194757	6.5014e-05	0.00117025	two.sided	Spearman's rank correlation rho	1.42321e+07
TGCT	CD4_naive	0.0708709	0.361305	1	two.sided	Spearman's rank correlation rho	734239
TGCT	CD8_naive	0.300494	7.5696e-05	0.00128683	two.sided	Spearman's rank correlation rho	552780
TGCT	Cytotoxic	-0.292756	0.000117663	0.00188261	two.sided	Spearman's rank correlation rho	1.02159e+06
TGCT	Exhausted	-0.163736	0.0339428	0.373371	two.sided	Spearman's rank correlation rho	919635
TGCT	Tr1	-0.0129545	0.867636	1	two.sided	Spearman's rank correlation rho	800481
TGCT	nTreg	0.384951	2.57409e-07	5.92041e-06	two.sided	Spearman's rank correlation rho	486039
TGCT	iTreg	0.289558	0.000140681	0.00211022	two.sided	Spearman's rank correlation rho	561422
TGCT	Th1	0.0776014	0.317394	1	two.sided	Spearman's rank correlation rho	728920
TGCT	Th2	0.163715	0.0339663	0.373371	two.sided	Spearman's rank correlation rho	660869
TGCT	Th17	-0.00826287	0.915343	1	two.sided	Spearman's rank correlation rho	796774
TGCT	Tfh	-0.389191	1.84938e-07	4.4385e-06	two.sided	Spearman's rank correlation rho	1.0978e+06
TGCT	Central_memory	-0.377825	4.44071e-07	9.76955e-06	two.sided	Spearman's rank correlation rho	1.08882e+06
TGCT	Effector_memory	0.0899501	0.246239	1	two.sided	Spearman's rank correlation rho	719161
TGCT	NKT	-0.0550828	0.478224	1	two.sided	Spearman's rank correlation rho	833773
TGCT	MAIT	-0.17297	0.0249526	0.299432	two.sided	Spearman's rank correlation rho	926932
TGCT	DC	0.124728	0.107205	0.964841	two.sided	Spearman's rank correlation rho	691678
TGCT	Bcell	-0.31938	2.4454e-05	0.000464618	two.sided	Spearman's rank correlation rho	1.04263e+06
TGCT	Monocyte	0.286802	0.000163821	0.0022935	two.sided	Spearman's rank correlation rho	563600
TGCT	Macrophage	0.259025	0.000698065	0.00907484	two.sided	Spearman's rank correlation rho	585551
TGCT	NK	-0.330327	1.2258e-05	0.000245155	two.sided	Spearman's rank correlation rho	1.05128e+06
TGCT	Neutrophil	0.307084	5.1477e-05	0.000926593	two.sided	Spearman's rank correlation rho	547573
TGCT	Gamma_delta	0.0353707	0.648983	1	two.sided	Spearman's rank correlation rho	762293
TGCT	CD4_T	-0.392179	1.46082e-07	3.65205e-06	two.sided	Spearman's rank correlation rho	1.10016e+06
TGCT	CD8_T	-0.337536	7.66523e-06	0.00016097	two.sided	Spearman's rank correlation rho	1.05698e+06
TGCT	InfiltrationScore	-0.0145139	0.851874	1	two.sided	Spearman's rank correlation rho	801714
THCA	CD4_naive	0.262352	8.92788e-10	1.07135e-08	two.sided	Spearman's rank correlation rho	1.81997e+07
THCA	CD8_naive	0.244126	1.28604e-08	1.28604e-07	two.sided	Spearman's rank correlation rho	1.86493e+07
THCA	Cytotoxic	-0.366528	2.89895e-18	6.0878e-17	two.sided	Spearman's rank correlation rho	3.37157e+07
THCA	Exhausted	-0.300043	1.81921e-12	3.27458e-11	two.sided	Spearman's rank correlation rho	3.20754e+07
THCA	Tr1	-0.237172	3.37028e-08	3.03325e-07	two.sided	Spearman's rank correlation rho	3.05242e+07
THCA	nTreg	-0.269799	2.82565e-10	3.95591e-09	two.sided	Spearman's rank correlation rho	3.13292e+07
THCA	iTreg	-0.32129	3.6213e-14	7.2426e-13	two.sided	Spearman's rank correlation rho	3.25996e+07
THCA	Th1	-0.299064	2.16269e-12	3.67657e-11	two.sided	Spearman's rank correlation rho	3.20512e+07
THCA	Th2	-0.0793065	0.0683631	0.205089	two.sided	Spearman's rank correlation rho	2.66293e+07
THCA	Th17	0.246768	8.8494e-09	9.73434e-08	two.sided	Spearman's rank correlation rho	1.85842e+07
THCA	Tfh	-0.370031	1.30811e-18	2.87784e-17	two.sided	Spearman's rank correlation rho	3.38022e+07
THCA	Central_memory	-0.0511027	0.240656	0.481312	two.sided	Spearman's rank correlation rho	2.59334e+07
THCA	Effector_memory	-0.233519	5.52466e-08	4.41973e-07	two.sided	Spearman's rank correlation rho	3.04341e+07
THCA	NKT	-0.285699	2.14795e-11	3.22193e-10	two.sided	Spearman's rank correlation rho	3.17215e+07
THCA	MAIT	0.181011	2.8137e-05	0.000112547	two.sided	Spearman's rank correlation rho	2.02066e+07
THCA	DC	-0.378474	1.84509e-19	4.24371e-18	two.sided	Spearman's rank correlation rho	3.40105e+07
THCA	Bcell	0.264694	6.24176e-10	8.11429e-09	two.sided	Spearman's rank correlation rho	1.81419e+07
THCA	Monocyte	-0.201054	3.14711e-06	1.5736e-05	two.sided	Spearman's rank correlation rho	2.96331e+07
THCA	Macrophage	-0.232766	6.11139e-08	4.41973e-07	two.sided	Spearman's rank correlation rho	3.04155e+07
THCA	NK	-0.314459	1.32037e-13	2.5087e-12	two.sided	Spearman's rank correlation rho	3.24311e+07
THCA	Neutrophil	0.446553	2.731e-27	6.8275e-26	two.sided	Spearman's rank correlation rho	1.36549e+07
THCA	Gamma_delta	0.0444323	0.307715	0.481312	two.sided	Spearman's rank correlation rho	2.35763e+07
THCA	CD4_T	-0.222508	2.33421e-07	1.40053e-06	two.sided	Spearman's rank correlation rho	3.01624e+07
THCA	CD8_T	-0.296581	3.34356e-12	5.34969e-11	two.sided	Spearman's rank correlation rho	3.199e+07
THCA	InfiltrationScore	-0.439993	1.86614e-26	4.47873e-25	two.sided	Spearman's rank correlation rho	3.55283e+07
THYM	CD4_naive	0.422736	1.51058e-06	3.1722e-05	two.sided	Spearman's rank correlation rho	166241
THYM	CD8_naive	0.51018	2.64523e-09	6.61306e-08	two.sided	Spearman's rank correlation rho	141058
THYM	Cytotoxic	-0.387005	1.2629e-05	0.000239942	two.sided	Spearman's rank correlation rho	399430
THYM	Exhausted	-0.257735	0.00448355	0.0672532	two.sided	Spearman's rank correlation rho	362203
THYM	Tr1	0.212994	0.019508	0.253604	two.sided	Spearman's rank correlation rho	226642
THYM	nTreg	-0.0623489	0.498718	1	two.sided	Spearman's rank correlation rho	305935
THYM	iTreg	0.132407	0.149408	1	two.sided	Spearman's rank correlation rho	249849
THYM	Th1	-0.182513	0.0460221	0.498568	two.sided	Spearman's rank correlation rho	340540
THYM	Th2	-0.165168	0.0714207	0.642786	two.sided	Spearman's rank correlation rho	335545
THYM	Th17	0.156491	0.0878468	0.702775	two.sided	Spearman's rank correlation rho	242914
THYM	Tfh	0.00702553	0.939295	1	two.sided	Spearman's rank correlation rho	285957
THYM	Central_memory	0.433666	7.50227e-07	1.6505e-05	two.sided	Spearman's rank correlation rho	163093
THYM	Effector_memory	-0.0801254	0.384332	1	two.sided	Spearman's rank correlation rho	311055
THYM	NKT	-0.288012	0.00142341	0.024198	two.sided	Spearman's rank correlation rho	370922
THYM	MAIT	-0.251729	0.00554576	0.0776406	two.sided	Spearman's rank correlation rho	360473
THYM	DC	0.0355584	0.699817	1	two.sided	Spearman's rank correlation rho	277740
THYM	Bcell	-0.0193121	0.834168	1	two.sided	Spearman's rank correlation rho	293542
THYM	Monocyte	-0.204177	0.0252958	0.303549	two.sided	Spearman's rank correlation rho	346779
THYM	Macrophage	-0.30459	0.000718457	0.0129322	two.sided	Spearman's rank correlation rho	375696
THYM	NK	-0.44646	3.20386e-07	7.36887e-06	two.sided	Spearman's rank correlation rho	416551
THYM	Neutrophil	0.183092	0.0453244	0.498568	two.sided	Spearman's rank correlation rho	235253
THYM	Gamma_delta	-0.389119	1.1213e-05	0.000224252	two.sided	Spearman's rank correlation rho	400038
THYM	CD4_T	0.269677	0.00289542	0.0463267	two.sided	Spearman's rank correlation rho	210319
THYM	CD8_T	-0.0562023	0.542059	1	two.sided	Spearman's rank correlation rho	304165
THYM	InfiltrationScore	-0.465515	8.44351e-08	2.02644e-06	two.sided	Spearman's rank correlation rho	422039
UCEC	CD4_naive	-0.043689	0.563668	1	two.sided	Spearman's rank correlation rho	964552
UCEC	CD8_naive	0.169972	0.0237099	0.426779	two.sided	Spearman's rank correlation rho	767092
UCEC	Cytotoxic	-0.115049	0.127295	1	two.sided	Spearman's rank correlation rho	1.0305e+06
UCEC	Exhausted	-0.0874294	0.247211	1	two.sided	Spearman's rank correlation rho	1.00498e+06
UCEC	Tr1	0.0222811	0.768477	1	two.sided	Spearman's rank correlation rho	903584
UCEC	nTreg	0.180719	0.0160786	0.321572	two.sided	Spearman's rank correlation rho	757160
UCEC	iTreg	0.188551	0.01196	0.263121	two.sided	Spearman's rank correlation rho	749922
UCEC	Th1	0.016781	0.824555	1	two.sided	Spearman's rank correlation rho	908667
UCEC	Th2	-0.150677	0.0452989	0.724783	two.sided	Spearman's rank correlation rho	1.06343e+06
UCEC	Th17	-0.118546	0.116061	1	two.sided	Spearman's rank correlation rho	1.03373e+06
UCEC	Tfh	-0.257679	0.000535042	0.012841	two.sided	Spearman's rank correlation rho	1.16232e+06
UCEC	Central_memory	-0.0610657	0.419422	1	two.sided	Spearman's rank correlation rho	980611
UCEC	Effector_memory	0.118436	0.116404	1	two.sided	Spearman's rank correlation rho	814721
UCEC	NKT	-0.18601	0.013181	0.276802	two.sided	Spearman's rank correlation rho	1.09608e+06
UCEC	MAIT	-0.112091	0.137439	1	two.sided	Spearman's rank correlation rho	1.02777e+06
UCEC	DC	0.107224	0.155458	1	two.sided	Spearman's rank correlation rho	825082
UCEC	Bcell	0.0984988	0.192121	1	two.sided	Spearman's rank correlation rho	833146
UCEC	Monocyte	0.0583326	0.440574	1	two.sided	Spearman's rank correlation rho	870266
UCEC	Macrophage	0.00709623	0.925315	1	two.sided	Spearman's rank correlation rho	917618
UCEC	NK	-0.217773	0.00359369	0.0826549	two.sided	Spearman's rank correlation rho	1.12544e+06
UCEC	Neutrophil	0.167015	0.0262914	0.446954	two.sided	Spearman's rank correlation rho	769824
UCEC	Gamma_delta	-0.0237656	0.753532	1	two.sided	Spearman's rank correlation rho	946140
UCEC	CD4_T	-0.347956	2.07894e-06	5.1973e-05	two.sided	Spearman's rank correlation rho	1.24575e+06
UCEC	CD8_T	-0.173499	0.0209193	0.397466	two.sided	Spearman's rank correlation rho	1.08452e+06
UCEC	InfiltrationScore	-0.115816	0.124762	1	two.sided	Spearman's rank correlation rho	1.03121e+06
UCS	CD4_naive	-0.0406124	0.764217	1	two.sided	Spearman's rank correlation rho	32109.1
UCS	CD8_naive	-0.0300825	0.824208	1	two.sided	Spearman's rank correlation rho	31784.2
UCS	Cytotoxic	-0.179319	0.181981	1	two.sided	Spearman's rank correlation rho	36389.1
UCS	Exhausted	-0.0179839	0.894369	1	two.sided	Spearman's rank correlation rho	31410.9
UCS	Tr1	-0.136871	0.309987	1	two.sided	Spearman's rank correlation rho	35079.3
UCS	nTreg	0.0518474	0.701701	1	two.sided	Spearman's rank correlation rho	29256.2
UCS	iTreg	-0.0346493	0.798045	1	two.sided	Spearman's rank correlation rho	31925.1
UCS	Th1	-0.372479	0.00432665	0.10384	two.sided	Spearman's rank correlation rho	42349.2
UCS	Th2	-0.170291	0.205348	1	two.sided	Spearman's rank correlation rho	36110.5
UCS	Th17	-0.00337088	0.980146	1	two.sided	Spearman's rank correlation rho	30960
UCS	Tfh	-0.223371	0.0948741	1	two.sided	Spearman's rank correlation rho	37748.3
UCS	Central_memory	0.00783413	0.953879	1	two.sided	Spearman's rank correlation rho	30614.3
UCS	Effector_memory	-0.0452905	0.737978	1	two.sided	Spearman's rank correlation rho	32253.5
UCS	NKT	0.0886678	0.511895	1	two.sided	Spearman's rank correlation rho	28120.1
UCS	MAIT	-0.107713	0.425147	1	two.sided	Spearman's rank correlation rho	34179.6
UCS	DC	-0.152465	0.257543	1	two.sided	Spearman's rank correlation rho	35560.5
UCS	Bcell	0.395338	0.00233726	0.0584316	two.sided	Spearman's rank correlation rho	18657.5
UCS	Monocyte	-0.164311	0.22195	1	two.sided	Spearman's rank correlation rho	35926
UCS	Macrophage	-0.279084	0.0355245	0.78154	two.sided	Spearman's rank correlation rho	39467.4
UCS	NK	-0.12434	0.356775	1	two.sided	Spearman's rank correlation rho	34692.6
UCS	Neutrophil	0.106511	0.430364	1	two.sided	Spearman's rank correlation rho	27569.5
UCS	Gamma_delta	-0.130691	0.332545	1	two.sided	Spearman's rank correlation rho	34888.6
UCS	CD4_T	-0.154961	0.249742	1	two.sided	Spearman's rank correlation rho	35637.5
UCS	CD8_T	-0.0694953	0.607479	1	two.sided	Spearman's rank correlation rho	33000.3
UCS	InfiltrationScore	-0.328861	0.0124988	0.287473	two.sided	Spearman's rank correlation rho	41003.3
UVM	CD4_naive	0.218051	0.052009	0.930643	two.sided	Spearman's rank correlation rho	66715.9
UVM	CD8_naive	0.201445	0.0731588	1	two.sided	Spearman's rank correlation rho	68132.7
UVM	Cytotoxic	-0.103959	0.35878	1	two.sided	Spearman's rank correlation rho	94189.8
UVM	Exhausted	-0.024558	0.828809	1	two.sided	Spearman's rank correlation rho	87415.3
UVM	Tr1	-0.0392771	0.729411	1	two.sided	Spearman's rank correlation rho	88671.1
UVM	nTreg	0.286451	0.00999506	0.239881	two.sided	Spearman's rank correlation rho	60880
UVM	iTreg	0.107677	0.341757	1	two.sided	Spearman's rank correlation rho	76133
UVM	Th1	0.218329	0.0517024	0.930643	two.sided	Spearman's rank correlation rho	66692.1
UVM	Th2	-0.0876501	0.439453	1	two.sided	Spearman's rank correlation rho	92798.3
UVM	Th17	0.139315	0.217768	1	two.sided	Spearman's rank correlation rho	73433.6
UVM	Tfh	-0.105475	0.351777	1	two.sided	Spearman's rank correlation rho	94319.1
UVM	Central_memory	0.0847103	0.455008	1	two.sided	Spearman's rank correlation rho	78092.5
UVM	Effector_memory	0.255721	0.0220533	0.485173	two.sided	Spearman's rank correlation rho	63501.9
UVM	NKT	-0.247068	0.0271439	0.54622	two.sided	Spearman's rank correlation rho	106400
UVM	MAIT	0.0370292	0.74435	1	two.sided	Spearman's rank correlation rho	82160.7
UVM	DC	-0.131043	0.246603	1	two.sided	Spearman's rank correlation rho	96500.6
UVM	Bcell	-0.155829	0.167497	1	two.sided	Spearman's rank correlation rho	98615.4
UVM	Monocyte	0.179042	0.112045	1	two.sided	Spearman's rank correlation rho	70044.1
UVM	Macrophage	-0.236794	0.0344477	0.654507	two.sided	Spearman's rank correlation rho	105523
UVM	NK	-0.368714	0.000764388	0.0191097	two.sided	Spearman's rank correlation rho	116779
UVM	Neutrophil	-0.025647	0.821341	1	two.sided	Spearman's rank correlation rho	87508.2
UVM	Gamma_delta	-0.248868	0.0260105	0.54622	two.sided	Spearman's rank correlation rho	106553
UVM	CD4_T	0.0795841	0.482846	1	two.sided	Spearman's rank correlation rho	78529.9
UVM	CD8_T	-0.0200783	0.859683	1	two.sided	Spearman's rank correlation rho	87033.1
UVM	InfiltrationScore	-0.279976	0.0118934	0.273548	two.sided	Spearman's rank correlation rho	109208

## Sheet: DLAT
cancertype	symbol	cell_type	cor	p_value	fdr	entrez
ACC	DLAT	Bcell	0.128489	0.259101	0.458173	1737
ACC	DLAT	CD4_T	-0.303186	0.00660627	0.146518	1737
ACC	DLAT	CD4_naive	0.0950588	0.404662	0.63649	1737
ACC	DLAT	CD8_T	-0.241822	0.0317871	0.102022	1737
ACC	DLAT	CD8_naive	-0.209393	0.0640188	0.242012	1737
ACC	DLAT	Central_memory	0.189065	0.0951667	0.305556	1737
ACC	DLAT	Cytotoxic	-0.244921	0.0295957	0.090557	1737
ACC	DLAT	DC	0.254788	0.0234482	0.187307	1737
ACC	DLAT	Effector_memory	-0.088659	0.437165	0.793229	1737
ACC	DLAT	Exhausted	-0.143929	0.205701	0.463399	1737
ACC	DLAT	Gamma_delta	-0.46457	1.6107e-05	0.00159359	1737
ACC	DLAT	InfiltrationScore	-0.0758603	0.506388	0.692693	1737
ACC	DLAT	MAIT	-0.203872	0.0715219	0.198471	1737
ACC	DLAT	Macrophage	0.0630257	0.581082	0.785789	1737
ACC	DLAT	Monocyte	-0.0756678	0.50747	0.833036	1737
ACC	DLAT	NK	-0.194212	0.0863353	0.216875	1737
ACC	DLAT	NKT	-0.116234	0.307678	0.53244	1737
ACC	DLAT	Neutrophil	0.307749	0.00579716	0.0249615	1737
ACC	DLAT	Tfh	-0.140431	0.21705	0.419367	1737
ACC	DLAT	Th1	-0.082393	0.470367	0.647286	1737
ACC	DLAT	Th17	0.159611	0.16	0.368118	1737
ACC	DLAT	Th2	-0.171965	0.129669	0.285412	1737
ACC	DLAT	Tr1	0.054328	0.634407	0.943742	1737
ACC	DLAT	iTreg	0.0347276	0.761252	0.87715	1737
ACC	DLAT	nTreg	0.0696566	0.541865	0.764613	1737
BLCA	DLAT	Bcell	0.00582089	0.904538	0.94172	1737
BLCA	DLAT	CD4_T	-0.274978	7.59463e-09	4.5775e-08	1737
BLCA	DLAT	CD4_naive	-0.0355049	0.46432	0.577978	1737
BLCA	DLAT	CD8_T	-0.107446	0.0264056	0.0997289	1737
BLCA	DLAT	CD8_naive	-0.0377432	0.436618	0.537243	1737
BLCA	DLAT	Central_memory	0.0881713	0.0687321	0.133373	1737
BLCA	DLAT	Cytotoxic	0.0118055	0.807818	0.852599	1737
BLCA	DLAT	DC	0.0910698	0.0600731	0.0999909	1737
BLCA	DLAT	Effector_memory	0.0643227	0.184628	0.332942	1737
BLCA	DLAT	Exhausted	0.0503873	0.298893	0.379649	1737
BLCA	DLAT	Gamma_delta	-0.200807	2.9155e-05	0.000178128	1737
BLCA	DLAT	InfiltrationScore	-0.0134438	0.78178	0.827634	1737
BLCA	DLAT	MAIT	0.0191491	0.693159	0.862474	1737
BLCA	DLAT	Macrophage	0.0658623	0.174317	0.231002	1737
BLCA	DLAT	Monocyte	0.0631534	0.192754	0.322213	1737
BLCA	DLAT	NK	-0.061052	0.208011	0.286707	1737
BLCA	DLAT	NKT	-0.048955	0.312857	0.407359	1737
BLCA	DLAT	Neutrophil	0.0737922	0.127897	0.196637	1737
BLCA	DLAT	Tfh	-0.107812	0.0258946	0.0659818	1737
BLCA	DLAT	Th1	0.0753608	0.11997	0.180058	1737
BLCA	DLAT	Th17	0.0127405	0.79293	0.853823	1737
BLCA	DLAT	Th2	-0.0586141	0.226782	0.324873	1737
BLCA	DLAT	Tr1	0.0738309	0.127697	0.247253	1737
BLCA	DLAT	iTreg	0.121835	0.0117484	0.0236936	1737
BLCA	DLAT	nTreg	0.104239	0.0312763	0.0812407	1737
BRCA	DLAT	Bcell	0.142281	6.16781e-07	1.76172e-06	1737
BRCA	DLAT	CD4_T	-0.123436	1.5602e-05	3.0702e-05	1737
BRCA	DLAT	CD4_naive	0.0231449	0.419648	0.8303	1737
BRCA	DLAT	CD8_T	-0.154576	5.90187e-08	2.17291e-07	1737
BRCA	DLAT	CD8_naive	-0.165363	6.42802e-09	2.26071e-08	1737
BRCA	DLAT	Central_memory	0.125994	1.0326e-05	2.6227e-05	1737
BRCA	DLAT	Cytotoxic	0.0103385	0.71851	0.767008	1737
BRCA	DLAT	DC	0.169974	2.38056e-09	7.82513e-09	1737
BRCA	DLAT	Effector_memory	0.0053859	0.851053	0.881276	1737
BRCA	DLAT	Exhausted	0.0705869	0.013739	0.0215154	1737
BRCA	DLAT	Gamma_delta	-0.185013	7.69039e-11	3.50572e-10	1737
BRCA	DLAT	InfiltrationScore	-0.0274101	0.33917	0.401547	1737
BRCA	DLAT	MAIT	-0.108808	0.000141919	0.000501139	1737
BRCA	DLAT	Macrophage	0.0382719	0.181941	0.234857	1737
BRCA	DLAT	Monocyte	0.102639	0.000333383	0.000871676	1737
BRCA	DLAT	NK	-0.139084	1.10064e-06	2.35173e-06	1737
BRCA	DLAT	NKT	-0.163207	1.01316e-08	2.97239e-08	1737
BRCA	DLAT	Neutrophil	0.057791	0.0437465	0.0682269	1737
BRCA	DLAT	Tfh	-0.12157	2.0978e-05	4.6886e-05	1737
BRCA	DLAT	Th1	0.0667823	0.0197585	0.0314215	1737
BRCA	DLAT	Th17	-0.00282433	0.921561	0.935843	1737
BRCA	DLAT	Th2	-0.0617262	0.0312341	0.0590763	1737
BRCA	DLAT	Tr1	0.0896704	0.00173276	0.00368127	1737
BRCA	DLAT	iTreg	0.205826	4.0544e-13	1.79022e-12	1737
BRCA	DLAT	nTreg	0.274135	1.94321e-22	3.50911e-21	1737
CESC	DLAT	Bcell	-0.0889811	0.117947	0.255869	1737
CESC	DLAT	CD4_T	-0.171233	0.00248588	0.00759746	1737
CESC	DLAT	CD4_naive	0.186852	0.000947242	0.0150095	1737
CESC	DLAT	CD8_T	-0.182334	0.00126228	0.00572764	1737
CESC	DLAT	CD8_naive	0.125084	0.0276589	0.0577705	1737
CESC	DLAT	Central_memory	-0.0329248	0.563592	0.681923	1737
CESC	DLAT	Cytotoxic	-0.209343	0.000205474	0.00113599	1737
CESC	DLAT	DC	-0.0738792	0.19453	0.290885	1737
CESC	DLAT	Effector_memory	0.0603418	0.289554	0.542002	1737
CESC	DLAT	Exhausted	-0.0850466	0.13516	0.243298	1737
CESC	DLAT	Gamma_delta	-0.119029	0.0361973	0.103269	1737
CESC	DLAT	InfiltrationScore	-0.210764	0.000185517	0.000819843	1737
CESC	DLAT	MAIT	-0.0908858	0.110254	0.28704	1737
CESC	DLAT	Macrophage	-0.119946	0.0347758	0.0786486	1737
CESC	DLAT	Monocyte	0.118675	0.0367593	0.152727	1737
CESC	DLAT	NK	-0.189752	0.000785131	0.00431919	1737
CESC	DLAT	NKT	-0.114373	0.0441966	0.143427	1737
CESC	DLAT	Neutrophil	0.213666	0.000150257	0.00102936	1737
CESC	DLAT	Tfh	-0.235552	2.7937e-05	0.000249237	1737
CESC	DLAT	Th1	-0.0764154	0.179609	0.310437	1737
CESC	DLAT	Th17	0.0406295	0.475994	0.614927	1737
CESC	DLAT	Th2	-0.179764	0.00148183	0.0142117	1737
CESC	DLAT	Tr1	-0.0489022	0.390866	0.584489	1737
CESC	DLAT	iTreg	0.0146522	0.797217	0.861895	1737
CESC	DLAT	nTreg	0.296361	1.05602e-07	1.0549e-05	1737
CHOL	DLAT	Bcell	0.00296521	0.984577	0.989846	1737
CHOL	DLAT	CD4_T	0.0728926	0.634179	0.807385	1737
CHOL	DLAT	CD4_naive	0.00615762	0.967978	0.993507	1737
CHOL	DLAT	CD8_T	-0.226527	0.134561	0.638364	1737
CHOL	DLAT	CD8_naive	-0.0429033	0.779605	0.847968	1737
CHOL	DLAT	Central_memory	0.101361	0.507634	0.868818	1737
CHOL	DLAT	Cytotoxic	-0.116624	0.445505	0.830276	1737
CHOL	DLAT	DC	0.129978	0.394769	0.669578	1737
CHOL	DLAT	Effector_memory	0.0740782	0.62866	0.782069	1737
CHOL	DLAT	Exhausted	-0.178491	0.240751	0.945036	1737
CHOL	DLAT	Gamma_delta	-0.190517	0.209994	0.605634	1737
CHOL	DLAT	InfiltrationScore	-0.216161	0.153819	0.305604	1737
CHOL	DLAT	MAIT	-0.360641	0.0149456	0.110263	1737
CHOL	DLAT	Macrophage	0.0218072	0.886932	0.926407	1737
CHOL	DLAT	Monocyte	0.00599631	0.968816	0.979445	1737
CHOL	DLAT	NK	-0.349992	0.0184317	0.0937225	1737
CHOL	DLAT	NKT	0.118201	0.439334	0.752022	1737
CHOL	DLAT	Neutrophil	0.0770397	0.614962	0.91423	1737
CHOL	DLAT	Tfh	-0.180799	0.234624	0.426899	1737
CHOL	DLAT	Th1	-0.157916	0.300184	0.593322	1737
CHOL	DLAT	Th17	0.116085	0.447624	0.56847	1737
CHOL	DLAT	Th2	0.0550229	0.719602	0.962791	1737
CHOL	DLAT	Tr1	0.288238	0.0548423	0.180007	1737
CHOL	DLAT	iTreg	0.251271	0.0959175	0.470244	1737
CHOL	DLAT	nTreg	0.0907539	0.553255	0.66834	1737
COAD	DLAT	Bcell	0.000528243	0.992384	0.994281	1737
COAD	DLAT	CD4_T	-0.154218	0.00505654	0.00917391	1737
COAD	DLAT	CD4_naive	0.0175208	0.751536	0.948168	1737
COAD	DLAT	CD8_T	-0.0554661	0.315857	0.43557	1737
COAD	DLAT	CD8_naive	-0.128222	0.0199919	0.0413306	1737
COAD	DLAT	Central_memory	-0.00996631	0.857083	0.9201	1737
COAD	DLAT	Cytotoxic	-0.0335461	0.544299	0.630242	1737
COAD	DLAT	DC	0.0377795	0.494674	0.620234	1737
COAD	DLAT	Effector_memory	0.157426	0.00420379	0.0151104	1737
COAD	DLAT	Exhausted	-0.0803855	0.145706	0.230156	1737
COAD	DLAT	Gamma_delta	-0.246703	5.95618e-06	5.1199e-05	1737
COAD	DLAT	InfiltrationScore	-0.0378431	0.493947	0.568273	1737
COAD	DLAT	MAIT	0.204384	0.000189553	0.000478494	1737
COAD	DLAT	Macrophage	-0.0215245	0.697293	0.780092	1737
COAD	DLAT	Monocyte	-0.139272	0.0114424	0.0230186	1737
COAD	DLAT	NK	-0.00229855	0.966871	0.974898	1737
COAD	DLAT	NKT	0.149672	0.00653214	0.0143336	1737
COAD	DLAT	Neutrophil	0.140777	0.0105733	0.0228379	1737
COAD	DLAT	Tfh	-0.0130272	0.813896	0.855699	1737
COAD	DLAT	Th1	0.0766069	0.165664	0.285141	1737
COAD	DLAT	Th17	0.186713	0.000664637	0.0024307	1737
COAD	DLAT	Th2	-0.084996	0.123901	0.167804	1737
COAD	DLAT	Tr1	-0.0360054	0.515173	0.624358	1737
COAD	DLAT	iTreg	-0.0656119	0.23529	0.34169	1737
COAD	DLAT	nTreg	0.0564137	0.307647	0.380443	1737
DLBC	DLAT	Bcell	-0.185598	0.206598	0.39402	1737
DLBC	DLAT	CD4_T	-0.0990121	0.50315	0.666244	1737
DLBC	DLAT	CD4_naive	-0.013994	0.924789	0.974138	1737
DLBC	DLAT	CD8_T	-0.50148	0.000282377	0.0106725	1737
DLBC	DLAT	CD8_naive	0.0277996	0.851221	0.957025	1737
DLBC	DLAT	Central_memory	0.314884	0.029268	0.0663873	1737
DLBC	DLAT	Cytotoxic	0.0416117	0.778851	0.939268	1737
DLBC	DLAT	DC	-0.247856	0.0894044	0.320544	1737
DLBC	DLAT	Effector_memory	-0.0323333	0.827302	0.912765	1737
DLBC	DLAT	Exhausted	-0.193395	0.187826	0.566313	1737
DLBC	DLAT	Gamma_delta	-0.130684	0.375972	0.625898	1737
DLBC	DLAT	InfiltrationScore	-0.298874	0.0390649	0.119737	1737
DLBC	DLAT	MAIT	-0.355429	0.0131709	0.1828	1737
DLBC	DLAT	Macrophage	0.0901072	0.542481	0.817459	1737
DLBC	DLAT	Monocyte	0.211098	0.149793	0.595236	1737
DLBC	DLAT	NK	-0.25342	0.0822176	0.214367	1737
DLBC	DLAT	NKT	-0.0534958	0.718011	0.95689	1737
DLBC	DLAT	Neutrophil	0.266884	0.0666981	0.435183	1737
DLBC	DLAT	Tfh	-0.322348	0.0254543	0.284166	1737
DLBC	DLAT	Th1	0.15954	0.278745	0.49045	1737
DLBC	DLAT	Th17	0.475203	0.000642348	0.00486868	1737
DLBC	DLAT	Th2	-0.144706	0.326444	0.53415	1737
DLBC	DLAT	Tr1	0.115976	0.432466	0.682083	1737
DLBC	DLAT	iTreg	0.133269	0.36652	0.50324	1737
DLBC	DLAT	nTreg	0.134329	0.362685	0.671259	1737
ESCA	DLAT	Bcell	0.0515505	0.473024	0.611675	1737
ESCA	DLAT	CD4_T	-0.0110399	0.877945	0.909227	1737
ESCA	DLAT	CD4_naive	-0.0537913	0.453976	0.863896	1737
ESCA	DLAT	CD8_T	0.00716112	0.920649	0.967785	1737
ESCA	DLAT	CD8_naive	0.0130991	0.855408	0.929364	1737
ESCA	DLAT	Central_memory	0.11969	0.0947311	0.189462	1737
ESCA	DLAT	Cytotoxic	-0.150306	0.0354851	0.162552	1737
ESCA	DLAT	DC	-0.200239	0.00489341	0.0132942	1737
ESCA	DLAT	Effector_memory	0.132779	0.0635619	0.31379	1737
ESCA	DLAT	Exhausted	-0.106812	0.136206	0.356295	1737
ESCA	DLAT	Gamma_delta	-0.00945026	0.895411	0.936319	1737
ESCA	DLAT	InfiltrationScore	-0.251299	0.000381062	0.00275102	1737
ESCA	DLAT	MAIT	0.0787201	0.272757	0.417182	1737
ESCA	DLAT	Macrophage	-0.222073	0.00175828	0.00937159	1737
ESCA	DLAT	Monocyte	-0.0609262	0.396271	0.621192	1737
ESCA	DLAT	NK	-0.185671	0.00917494	0.0353687	1737
ESCA	DLAT	NKT	0.0288085	0.688551	0.846647	1737
ESCA	DLAT	Neutrophil	0.18283	0.0103206	0.0320304	1737
ESCA	DLAT	Tfh	-0.0353417	0.62288	0.71745	1737
ESCA	DLAT	Th1	0.0132896	0.853329	0.942466	1737
ESCA	DLAT	Th17	0.0479651	0.504388	0.644168	1737
ESCA	DLAT	Th2	-0.135071	0.0590862	0.134507	1737
ESCA	DLAT	Tr1	-0.0736129	0.305184	0.466071	1737
ESCA	DLAT	iTreg	-0.093529	0.192271	0.387738	1737
ESCA	DLAT	nTreg	0.149815	0.0360969	0.0746166	1737
GBM	DLAT	Bcell	0.00801286	0.916426	0.949686	1737
GBM	DLAT	CD4_T	-0.201061	0.00780754	0.0210547	1737
GBM	DLAT	CD4_naive	-0.0213595	0.779668	0.847673	1737
GBM	DLAT	CD8_T	-0.0836741	0.272332	0.445065	1737
GBM	DLAT	CD8_naive	0.0457819	0.548595	0.684058	1737
GBM	DLAT	Central_memory	0.210187	0.00537365	0.0448279	1737
GBM	DLAT	Cytotoxic	-0.160586	0.0342803	0.102031	1737
GBM	DLAT	DC	-0.112497	0.139424	0.254608	1737
GBM	DLAT	Effector_memory	-0.0460523	0.546233	0.679768	1737
GBM	DLAT	Exhausted	0.0174384	0.819345	0.889192	1737
GBM	DLAT	Gamma_delta	-0.0369684	0.628175	0.774443	1737
GBM	DLAT	InfiltrationScore	-0.244459	0.00115055	0.00523538	1737
GBM	DLAT	MAIT	-0.114137	0.133713	0.24745	1737
GBM	DLAT	Macrophage	-0.0958944	0.208132	0.292682	1737
GBM	DLAT	Monocyte	0.0007051	0.992633	0.995083	1737
GBM	DLAT	NK	-0.320469	1.6247e-05	0.000226822	1737
GBM	DLAT	NKT	0.0778558	0.30719	0.597308	1737
GBM	DLAT	Neutrophil	0.183735	0.0152301	0.0418897	1737
GBM	DLAT	Tfh	-0.159041	0.0360697	0.134664	1737
GBM	DLAT	Th1	-0.157004	0.0385507	0.169944	1737
GBM	DLAT	Th17	0.143008	0.059768	0.160701	1737
GBM	DLAT	Th2	-0.025137	0.741973	0.817637	1737
GBM	DLAT	Tr1	-0.132723	0.0808377	0.301271	1737
GBM	DLAT	iTreg	-0.172449	0.0228797	0.119283	1737
GBM	DLAT	nTreg	-0.0226044	0.767183	0.872732	1737
HNSC	DLAT	Bcell	0.00985706	0.814989	0.864876	1737
HNSC	DLAT	CD4_T	0.0066807	0.873992	0.896862	1737
HNSC	DLAT	CD4_naive	0.098923	0.0185713	0.114164	1737
HNSC	DLAT	CD8_T	-0.124503	0.00300702	0.00926031	1737
HNSC	DLAT	CD8_naive	0.0585228	0.164402	0.255107	1737
HNSC	DLAT	Central_memory	0.135361	0.00124618	0.00266615	1737
HNSC	DLAT	Cytotoxic	-0.140269	0.000819039	0.00271905	1737
HNSC	DLAT	DC	-0.129848	0.00196508	0.00482945	1737
HNSC	DLAT	Effector_memory	-0.143692	0.000606269	0.00150859	1737
HNSC	DLAT	Exhausted	-0.281305	9.37576e-12	1.39582e-10	1737
HNSC	DLAT	Gamma_delta	-0.0637693	0.129694	0.175909	1737
HNSC	DLAT	InfiltrationScore	-0.219364	1.35205e-07	9.36153e-07	1737
HNSC	DLAT	MAIT	0.0534741	0.203983	0.293039	1737
HNSC	DLAT	Macrophage	-0.133192	0.00149373	0.00453146	1737
HNSC	DLAT	Monocyte	-0.129872	0.00196129	0.00690999	1737
HNSC	DLAT	NK	-0.128697	0.00215642	0.00625425	1737
HNSC	DLAT	NKT	0.0934897	0.0261385	0.0517882	1737
HNSC	DLAT	Neutrophil	0.171741	4.002e-05	0.000118267	1737
HNSC	DLAT	Tfh	-0.0279308	0.507231	0.580682	1737
HNSC	DLAT	Th1	-0.185445	8.96702e-06	4.1076e-05	1737
HNSC	DLAT	Th17	0.244952	3.5287e-09	3.65923e-08	1737
HNSC	DLAT	Th2	-0.11884	0.00463906	0.0143207	1737
HNSC	DLAT	Tr1	0.0128666	0.76003	0.815105	1737
HNSC	DLAT	iTreg	0.0375917	0.372032	0.44805	1737
HNSC	DLAT	nTreg	-0.0421748	0.316537	0.42205	1737
KICH	DLAT	Bcell	0.303882	0.00340748	0.00816006	1737
KICH	DLAT	CD4_T	-0.0726217	0.493916	0.82106	1737
KICH	DLAT	CD4_naive	0.100393	0.34372	0.520736	1737
KICH	DLAT	CD8_T	-0.122906	0.245783	0.50334	1737
KICH	DLAT	CD8_naive	0.0824701	0.437062	0.550534	1737
KICH	DLAT	Central_memory	0.466141	3.21383e-06	4.8195e-05	1737
KICH	DLAT	Cytotoxic	0.16881	0.109692	0.224963	1737
KICH	DLAT	DC	0.415387	4.2332e-05	0.00033967	1737
KICH	DLAT	Effector_memory	-0.0355831	0.737734	0.862018	1737
KICH	DLAT	Exhausted	-0.230782	0.0277442	0.053643	1737
KICH	DLAT	Gamma_delta	-0.493791	6.56644e-07	1.7171e-05	1737
KICH	DLAT	InfiltrationScore	0.19654	0.0618725	0.187502	1737
KICH	DLAT	MAIT	0.179463	0.0887271	0.277553	1737
KICH	DLAT	Macrophage	0.393204	0.000115452	0.00147546	1737
KICH	DLAT	Monocyte	0.0214876	0.839785	0.980751	1737
KICH	DLAT	NK	-0.241396	0.0211585	0.0752348	1737
KICH	DLAT	NKT	-0.549319	1.71479e-08	1.75786e-07	1737
KICH	DLAT	Neutrophil	-0.165049	0.117947	0.282932	1737
KICH	DLAT	Tfh	-0.183365	0.081896	0.171385	1737
KICH	DLAT	Th1	0.145861	0.167717	0.596291	1737
KICH	DLAT	Th17	-0.183444	0.0817607	0.126868	1737
KICH	DLAT	Th2	-0.260158	0.0127568	0.0285785	1737
KICH	DLAT	Tr1	-0.15402	0.144936	0.415436	1737
KICH	DLAT	iTreg	0.0804916	0.448177	0.692774	1737
KICH	DLAT	nTreg	0.369214	0.000316365	0.00465414	1737
KIRC	DLAT	Bcell	0.0205921	0.612909	0.784827	1737
KIRC	DLAT	CD4_T	-0.305998	1.33168e-14	1.32267e-13	1737
KIRC	DLAT	CD4_naive	0.380633	2.50338e-22	2.06383e-21	1737
KIRC	DLAT	CD8_T	-0.48634	2.66512e-37	5.20928e-36	1737
KIRC	DLAT	CD8_naive	0.150521	0.000200051	0.00052686	1737
KIRC	DLAT	Central_memory	0.0137458	0.73559	0.789694	1737
KIRC	DLAT	Cytotoxic	-0.50049	9.82633e-40	6.50122e-38	1737
KIRC	DLAT	DC	-0.0164364	0.686354	0.741906	1737
KIRC	DLAT	Effector_memory	0.0499011	0.219956	0.359877	1737
KIRC	DLAT	Exhausted	-0.324038	2.7872e-16	2.2742e-15	1737
KIRC	DLAT	Gamma_delta	-0.316412	1.47568e-15	1.34058e-14	1737
KIRC	DLAT	InfiltrationScore	-0.334443	2.65443e-17	1.98029e-16	1737
KIRC	DLAT	MAIT	-0.148237	0.000250383	0.00088802	1737
KIRC	DLAT	Macrophage	-0.136389	0.000761824	0.00154597	1737
KIRC	DLAT	Monocyte	-0.216964	6.87617e-08	4.17573e-07	1737
KIRC	DLAT	NK	-0.470529	1.03182e-34	4.0799e-33	1737
KIRC	DLAT	NKT	-0.343194	3.42306e-18	7.95011e-17	1737
KIRC	DLAT	Neutrophil	0.449932	1.54197e-31	2.06071e-30	1737
KIRC	DLAT	Tfh	-0.497215	3.67966e-39	1.47135e-37	1737
KIRC	DLAT	Th1	-0.344353	2.59674e-18	2.39579e-17	1737
KIRC	DLAT	Th17	0.427295	2.72665e-28	4.95403e-27	1737
KIRC	DLAT	Th2	0.196569	1.07923e-06	4.8604e-06	1737
KIRC	DLAT	Tr1	-0.1153	0.00448343	0.0107723	1737
KIRC	DLAT	iTreg	-0.229405	1.1167e-08	3.91633e-08	1737
KIRC	DLAT	nTreg	-0.0868603	0.0325271	0.0521746	1737
KIRP	DLAT	Bcell	-0.0255765	0.646982	0.784179	1737
KIRP	DLAT	CD4_T	-0.360899	2.2664e-11	2.63338e-10	1737
KIRP	DLAT	CD4_naive	0.262345	1.74743e-06	8.40758e-06	1737
KIRP	DLAT	CD8_T	-0.362192	1.90067e-11	2.87362e-10	1737
KIRP	DLAT	CD8_naive	0.194915	0.000426168	0.00180291	1737
KIRP	DLAT	Central_memory	0.19145	0.000541192	0.00153	1737
KIRP	DLAT	Cytotoxic	-0.253301	4.02418e-06	2.2786e-05	1737
KIRP	DLAT	DC	-0.0347447	0.533807	0.619024	1737
KIRP	DLAT	Effector_memory	-0.177025	0.00140092	0.00478688	1737
KIRP	DLAT	Exhausted	-0.188438	0.000663936	0.00202216	1737
KIRP	DLAT	Gamma_delta	-0.206351	0.000188107	0.000685074	1737
KIRP	DLAT	InfiltrationScore	-0.276747	4.33761e-07	2.05937e-06	1737
KIRP	DLAT	MAIT	-0.0962503	0.0841434	0.160409	1737
KIRP	DLAT	Macrophage	-0.0119297	0.830875	0.873831	1737
KIRP	DLAT	Monocyte	-0.116503	0.0363644	0.0647446	1737
KIRP	DLAT	NK	-0.413211	9.45083e-15	2.80286e-13	1737
KIRP	DLAT	NKT	-0.0704536	0.206637	0.345048	1737
KIRP	DLAT	Neutrophil	0.321071	3.52525e-09	3.49704e-08	1737
KIRP	DLAT	Tfh	-0.342134	2.6719e-10	4.2208e-09	1737
KIRP	DLAT	Th1	-0.135152	0.0150689	0.0416913	1737
KIRP	DLAT	Th17	0.270281	8.18996e-07	3.60926e-06	1737
KIRP	DLAT	Th2	-0.0605728	0.277743	0.483948	1737
KIRP	DLAT	Tr1	-0.10446	0.0607614	0.183509	1737
KIRP	DLAT	iTreg	-0.218435	7.5441e-05	0.000593535	1737
KIRP	DLAT	nTreg	-0.108483	0.0514293	0.128161	1737
LAML	DLAT	Bcell	0.322464	1.5132e-05	0.000230463	1737
LAML	DLAT	CD4_T	-0.184467	0.0151164	0.0396624	1737
LAML	DLAT	CD4_naive	0.157833	0.0380846	0.727568	1737
LAML	DLAT	CD8_T	-0.0597534	0.434842	0.566751	1737
LAML	DLAT	CD8_naive	0.271118	0.000308604	0.0112303	1737
LAML	DLAT	Central_memory	0.4184	1.01455e-08	1.21347e-07	1737
LAML	DLAT	Cytotoxic	-0.317115	2.1282e-05	0.00038521	1737
LAML	DLAT	DC	-0.0260713	0.73349	0.833185	1737
LAML	DLAT	Effector_memory	-0.105915	0.165472	0.355207	1737
LAML	DLAT	Exhausted	-0.0894277	0.241978	0.399605	1737
LAML	DLAT	Gamma_delta	-0.0582286	0.446674	0.619513	1737
LAML	DLAT	InfiltrationScore	-0.251831	0.000830734	0.00252522	1737
LAML	DLAT	MAIT	-0.186837	0.0138413	0.0725852	1737
LAML	DLAT	Macrophage	-0.174898	0.0213625	0.0406893	1737
LAML	DLAT	Monocyte	-0.176221	0.0203837	0.0387281	1737
LAML	DLAT	NK	-0.10047	0.188432	0.315109	1737
LAML	DLAT	NKT	-0.184338	0.0151882	0.0357326	1737
LAML	DLAT	Neutrophil	-0.0938956	0.219159	0.320219	1737
LAML	DLAT	Tfh	-0.266724	0.000389259	0.00385888	1737
LAML	DLAT	Th1	0.0670711	0.380609	0.641334	1737
LAML	DLAT	Th17	0.0905629	0.236029	0.462013	1737
LAML	DLAT	Th2	0.0800493	0.295131	0.519122	1737
LAML	DLAT	Tr1	-0.175075	0.0212294	0.0619553	1737
LAML	DLAT	iTreg	-0.0557157	0.466566	0.635345	1737
LAML	DLAT	nTreg	0.158806	0.0368987	0.114554	1737
LGG	DLAT	Bcell	-0.0825885	0.0564847	0.0875734	1737
LGG	DLAT	CD4_T	-0.0143345	0.741032	0.795215	1737
LGG	DLAT	CD4_naive	0.0576414	0.183523	0.353464	1737
LGG	DLAT	CD8_T	0.00568328	0.895755	0.923286	1737
LGG	DLAT	CD8_naive	0.0307341	0.478498	0.574381	1737
LGG	DLAT	Central_memory	0.262555	7.20899e-10	3.20025e-09	1737
LGG	DLAT	Cytotoxic	0.138551	0.00132875	0.00286267	1737
LGG	DLAT	DC	-0.185219	1.6518e-05	4.2483e-05	1737
LGG	DLAT	Effector_memory	-0.0978244	0.0237781	0.0418161	1737
LGG	DLAT	Exhausted	0.0789104	0.0684453	0.100029	1737
LGG	DLAT	Gamma_delta	-0.151583	0.000439799	0.0012696	1737
LGG	DLAT	InfiltrationScore	-0.239156	2.20661e-08	6.28168e-08	1737
LGG	DLAT	MAIT	0.10431	0.0158921	0.0268842	1737
LGG	DLAT	Macrophage	-0.157738	0.000252741	0.000494553	1737
LGG	DLAT	Monocyte	-0.173626	5.4951e-05	0.00012052	1737
LGG	DLAT	NK	-2.0687e-05	0.999619	0.999668	1737
LGG	DLAT	NKT	0.0287247	0.507738	0.645377	1737
LGG	DLAT	Neutrophil	-0.0487775	0.260504	0.3475	1737
LGG	DLAT	Tfh	-0.220069	2.797e-07	2.02148e-06	1737
LGG	DLAT	Th1	0.02485	0.566653	0.63672	1737
LGG	DLAT	Th17	0.341339	4.88628e-16	1.69268e-13	1737
LGG	DLAT	Th2	0.0290356	0.503154	0.578769	1737
LGG	DLAT	Tr1	-0.0230717	0.594745	0.699873	1737
LGG	DLAT	iTreg	-0.0406152	0.348892	0.557437	1737
LGG	DLAT	nTreg	0.0443186	0.306669	0.506148	1737
LIHC	DLAT	Bcell	-0.0610975	0.209285	0.270334	1737
LIHC	DLAT	CD4_T	-0.0343609	0.480404	0.576456	1737
LIHC	DLAT	CD4_naive	-0.0102453	0.833397	0.874702	1737
LIHC	DLAT	CD8_T	-0.173202	0.000339624	0.00124541	1737
LIHC	DLAT	CD8_naive	0.105414	0.0299877	0.0880338	1737
LIHC	DLAT	Central_memory	0.135607	0.00515786	0.011686	1737
LIHC	DLAT	Cytotoxic	-0.110444	0.0229401	0.0673939	1737
LIHC	DLAT	DC	0.169239	0.000465536	0.00200993	1737
LIHC	DLAT	Effector_memory	-0.00200527	0.967161	0.977448	1737
LIHC	DLAT	Exhausted	-0.146925	0.00242204	0.00983996	1737
LIHC	DLAT	Gamma_delta	-0.203194	2.4898e-05	0.000375021	1737
LIHC	DLAT	InfiltrationScore	-0.0480635	0.323477	0.421862	1737
LIHC	DLAT	MAIT	0.0114194	0.814634	0.864933	1737
LIHC	DLAT	Macrophage	0.0555577	0.253659	0.337711	1737
LIHC	DLAT	Monocyte	0.0266727	0.583897	0.672717	1737
LIHC	DLAT	NK	-0.148625	0.00215212	0.00541421	1737
LIHC	DLAT	NKT	-0.00365852	0.940126	0.959985	1737
LIHC	DLAT	Neutrophil	0.0725166	0.136023	0.221182	1737
LIHC	DLAT	Tfh	-0.12282	0.011369	0.0269245	1737
LIHC	DLAT	Th1	-0.0389175	0.424117	0.591585	1737
LIHC	DLAT	Th17	0.0514006	0.290979	0.364894	1737
LIHC	DLAT	Th2	-0.0622932	0.200492	0.348061	1737
LIHC	DLAT	Tr1	0.0882961	0.0693229	0.135448	1737
LIHC	DLAT	iTreg	0.208422	1.5142e-05	5.4274e-05	1737
LIHC	DLAT	nTreg	0.149953	0.00196059	0.00503932	1737
LUAD	DLAT	Bcell	0.0157493	0.706035	0.783083	1737
LUAD	DLAT	CD4_T	-0.355075	1.47741e-18	1.60768e-17	1737
LUAD	DLAT	CD4_naive	0.10938	0.00860615	0.062898	1737
LUAD	DLAT	CD8_T	-0.0450923	0.279958	0.403356	1737
LUAD	DLAT	CD8_naive	0.0784789	0.0597945	0.110893	1737
LUAD	DLAT	Central_memory	0.178263	1.681e-05	0.000112306	1737
LUAD	DLAT	Cytotoxic	-0.130666	0.00167427	0.00545927	1737
LUAD	DLAT	DC	0.0358755	0.39011	0.516176	1737
LUAD	DLAT	Effector_memory	0.193689	2.8291e-06	9.16524e-06	1737
LUAD	DLAT	Exhausted	0.14084	0.000699633	0.00163427	1737
LUAD	DLAT	Gamma_delta	-0.168745	4.695e-05	0.000200248	1737
LUAD	DLAT	InfiltrationScore	-0.279285	8.82065e-12	5.81751e-11	1737
LUAD	DLAT	MAIT	-0.227048	3.60016e-08	1.33586e-07	1737
LUAD	DLAT	Macrophage	-0.0831848	0.0459821	0.0767734	1737
LUAD	DLAT	Monocyte	0.106882	0.0102594	0.0313676	1737
LUAD	DLAT	NK	-0.268138	6.09101e-11	4.47961e-10	1737
LUAD	DLAT	NKT	-0.26978	4.60743e-11	1.96011e-10	1737
LUAD	DLAT	Neutrophil	0.0563698	0.176692	0.299306	1737
LUAD	DLAT	Tfh	-0.26574	9.1246e-11	5.41778e-10	1737
LUAD	DLAT	Th1	0.101185	0.0151236	0.0310568	1737
LUAD	DLAT	Th17	0.0593921	0.154571	0.236423	1737
LUAD	DLAT	Th2	-0.226776	3.74112e-08	2.50277e-07	1737
LUAD	DLAT	Tr1	0.0522654	0.210387	0.325147	1737
LUAD	DLAT	iTreg	0.0757745	0.0691786	0.115229	1737
LUAD	DLAT	nTreg	0.382221	1.78042e-21	1.48588e-20	1737
LUSC	DLAT	Bcell	0.134608	0.00149524	0.00788186	1737
LUSC	DLAT	CD4_T	-0.319786	1.2259e-14	5.74929e-14	1737
LUSC	DLAT	CD4_naive	0.0572289	0.178603	0.56666	1737
LUSC	DLAT	CD8_T	-0.0997003	0.0189143	0.0624369	1737
LUSC	DLAT	CD8_naive	0.051833	0.223199	0.283528	1737
LUSC	DLAT	Central_memory	0.0596426	0.160946	0.297055	1737
LUSC	DLAT	Cytotoxic	-0.159766	0.000159217	0.000351824	1737
LUSC	DLAT	DC	0.123394	0.00362698	0.0112299	1737
LUSC	DLAT	Effector_memory	0.138034	0.00112516	0.00220967	1737
LUSC	DLAT	Exhausted	0.0295898	0.48703	0.618007	1737
LUSC	DLAT	Gamma_delta	-0.113437	0.00752669	0.01551	1737
LUSC	DLAT	InfiltrationScore	-0.126484	0.00286045	0.00451732	1737
LUSC	DLAT	MAIT	0.0251237	0.555123	0.624533	1737
LUSC	DLAT	Macrophage	0.0149145	0.726135	0.766486	1737
LUSC	DLAT	Monocyte	0.0144209	0.734853	0.830078	1737
LUSC	DLAT	NK	-0.19551	3.54923e-06	8.69154e-06	1737
LUSC	DLAT	NKT	-0.130573	0.00207304	0.00379852	1737
LUSC	DLAT	Neutrophil	0.0892096	0.0358002	0.0840856	1737
LUSC	DLAT	Tfh	-0.236363	1.79431e-08	4.93753e-08	1737
LUSC	DLAT	Th1	0.038771	0.362378	0.52341	1737
LUSC	DLAT	Th17	-0.046229	0.277379	0.394798	1737
LUSC	DLAT	Th2	-0.0683989	0.107799	0.192313	1737
LUSC	DLAT	Tr1	0.0513137	0.227876	0.379794	1737
LUSC	DLAT	iTreg	0.0421308	0.322251	0.452105	1737
LUSC	DLAT	nTreg	0.145235	0.000606027	0.00135987	1737
MESO	DLAT	Bcell	-0.26433	0.0133601	0.223773	1737
MESO	DLAT	CD4_T	-0.0804371	0.458926	0.759169	1737
MESO	DLAT	CD4_naive	0.0478361	0.659948	0.845566	1737
MESO	DLAT	CD8_T	-0.164282	0.128384	0.558565	1737
MESO	DLAT	CD8_naive	0.119523	0.270171	0.477332	1737
MESO	DLAT	Central_memory	-0.00609812	0.955296	0.983848	1737
MESO	DLAT	Cytotoxic	-0.137264	0.204867	0.402116	1737
MESO	DLAT	DC	-0.0592466	0.585684	0.816809	1737
MESO	DLAT	Effector_memory	0.0924718	0.394285	0.650059	1737
MESO	DLAT	Exhausted	-0.386202	0.000220251	0.00821532	1737
MESO	DLAT	Gamma_delta	-0.123954	0.25268	0.577388	1737
MESO	DLAT	InfiltrationScore	-0.278997	0.00887455	0.0520514	1737
MESO	DLAT	MAIT	-0.101357	0.350237	0.680119	1737
MESO	DLAT	Macrophage	-0.0456503	0.674589	0.820921	1737
MESO	DLAT	Monocyte	0.100204	0.355775	0.784797	1737
MESO	DLAT	NK	-0.328938	0.0018658	0.02713	1737
MESO	DLAT	NKT	-0.0188886	0.862142	0.9516	1737
MESO	DLAT	Neutrophil	0.179831	0.0955718	0.384966	1737
MESO	DLAT	Tfh	-0.0848689	0.43447	0.739757	1737
MESO	DLAT	Th1	-0.20155	0.0612061	0.231218	1737
MESO	DLAT	Th17	0.346608	0.0010063	0.00926397	1737
MESO	DLAT	Th2	-0.268937	0.0117759	0.156865	1737
MESO	DLAT	Tr1	-0.0426482	0.694895	0.906803	1737
MESO	DLAT	iTreg	0.0150249	0.890143	0.943124	1737
MESO	DLAT	nTreg	0.190909	0.0765184	0.272226	1737
OV	DLAT	Bcell	0.135352	0.017285	0.0798351	1737
OV	DLAT	CD4_T	-0.0464706	0.41564	0.544014	1737
OV	DLAT	CD4_naive	0.00112968	0.984221	0.995031	1737
OV	DLAT	CD8_T	-0.132124	0.0201622	0.0810246	1737
OV	DLAT	CD8_naive	0.0103008	0.856884	0.896119	1737
OV	DLAT	Central_memory	-0.0772888	0.175375	0.29925	1737
OV	DLAT	Cytotoxic	-0.0246799	0.665639	0.767587	1737
OV	DLAT	DC	-0.0664042	0.244491	0.427332	1737
OV	DLAT	Effector_memory	0.121942	0.0321249	0.0790042	1737
OV	DLAT	Exhausted	0.014143	0.804431	0.863142	1737
OV	DLAT	Gamma_delta	0.0199774	0.726502	0.838837	1737
OV	DLAT	InfiltrationScore	-0.0580645	0.308962	0.459377	1737
OV	DLAT	MAIT	-0.0961627	0.0915171	0.222125	1737
OV	DLAT	Macrophage	0.038381	0.501463	0.610665	1737
OV	DLAT	Monocyte	-0.0797198	0.162146	0.340936	1737
OV	DLAT	NK	-0.00671942	0.906353	0.947162	1737
OV	DLAT	NKT	-0.052636	0.356452	0.638469	1737
OV	DLAT	Neutrophil	0.0285987	0.616522	0.713971	1737
OV	DLAT	Tfh	-0.0185032	0.745963	0.823813	1737
OV	DLAT	Th1	0.00451917	0.936939	0.96108	1737
OV	DLAT	Th17	0.0532105	0.35122	0.532409	1737
OV	DLAT	Th2	-0.013657	0.811023	0.892192	1737
OV	DLAT	Tr1	0.038676	0.498177	0.678296	1737
OV	DLAT	iTreg	-0.0656468	0.249926	0.415077	1737
OV	DLAT	nTreg	-0.0013411	0.981268	0.992275	1737
PAAD	DLAT	Bcell	0.025951	0.727305	0.881995	1737
PAAD	DLAT	CD4_T	-0.110812	0.135339	0.200748	1737
PAAD	DLAT	CD4_naive	0.0277938	0.708789	0.913684	1737
PAAD	DLAT	CD8_T	-0.181726	0.0138154	0.0451093	1737
PAAD	DLAT	CD8_naive	0.207555	0.00481316	0.051664	1737
PAAD	DLAT	Central_memory	0.27307	0.00018399	0.000843462	1737
PAAD	DLAT	Cytotoxic	-0.0337414	0.650227	0.763012	1737
PAAD	DLAT	DC	0.168618	0.0225036	0.0686541	1737
PAAD	DLAT	Effector_memory	-0.0815403	0.272499	0.478324	1737
PAAD	DLAT	Exhausted	-0.0524264	0.480912	0.716662	1737
PAAD	DLAT	Gamma_delta	-0.28732	8.0255e-05	0.000448568	1737
PAAD	DLAT	InfiltrationScore	-0.0333571	0.653952	0.763518	1737
PAAD	DLAT	MAIT	-0.0741594	0.31842	0.440051	1737
PAAD	DLAT	Macrophage	0.0989375	0.182695	0.330736	1737
PAAD	DLAT	Monocyte	0.124427	0.0933068	0.166556	1737
PAAD	DLAT	NK	-0.14995	0.0427597	0.0950603	1737
PAAD	DLAT	NKT	-0.178075	0.0158759	0.0938527	1737
PAAD	DLAT	Neutrophil	-0.0312474	0.674549	0.767345	1737
PAAD	DLAT	Tfh	-0.0703858	0.343734	0.459873	1737
PAAD	DLAT	Th1	-0.0563762	0.448439	0.789311	1737
PAAD	DLAT	Th17	0.0275173	0.711557	0.810739	1737
PAAD	DLAT	Th2	0.0360912	0.627644	0.80213	1737
PAAD	DLAT	Tr1	0.145636	0.0491687	0.100366	1737
PAAD	DLAT	iTreg	0.216883	0.00318789	0.00838815	1737
PAAD	DLAT	nTreg	0.247802	0.000719241	0.00366177	1737
PCPG	DLAT	Bcell	0.113789	0.120987	0.25497	1737
PCPG	DLAT	CD4_T	0.154141	0.0351773	0.115415	1737
PCPG	DLAT	CD4_naive	0.00429158	0.953515	0.98462	1737
PCPG	DLAT	CD8_T	-0.0169624	0.817767	0.925393	1737
PCPG	DLAT	CD8_naive	-0.241812	0.000855541	0.00444074	1737
PCPG	DLAT	Central_memory	0.431509	7.01526e-10	1.7482e-08	1737
PCPG	DLAT	Cytotoxic	-0.0892565	0.22444	0.430772	1737
PCPG	DLAT	DC	0.054529	0.458557	0.659273	1737
PCPG	DLAT	Effector_memory	0.093515	0.203013	0.389885	1737
PCPG	DLAT	Exhausted	-0.044694	0.543594	0.735843	1737
PCPG	DLAT	Gamma_delta	-0.101216	0.16809	0.416356	1737
PCPG	DLAT	InfiltrationScore	-0.0660569	0.369058	0.537944	1737
PCPG	DLAT	MAIT	-0.296692	3.7361e-05	0.000288891	1737
PCPG	DLAT	Macrophage	-0.0291053	0.69253	0.808215	1737
PCPG	DLAT	Monocyte	-0.207253	0.00442564	0.0294417	1737
PCPG	DLAT	NK	-0.126451	0.0846119	0.188594	1737
PCPG	DLAT	NKT	-0.237383	0.0010706	0.0101075	1737
PCPG	DLAT	Neutrophil	0.0106595	0.884874	0.941544	1737
PCPG	DLAT	Tfh	-0.00994869	0.892503	0.952595	1737
PCPG	DLAT	Th1	0.240853	0.000898401	0.00615133	1737
PCPG	DLAT	Th17	-0.113481	0.122003	0.307649	1737
PCPG	DLAT	Th2	-0.0557127	0.448846	0.632561	1737
PCPG	DLAT	Tr1	0.064971	0.376998	0.638454	1737
PCPG	DLAT	iTreg	0.171461	0.0189568	0.0746538	1737
PCPG	DLAT	nTreg	0.358404	4.73947e-07	9.82996e-06	1737
PRAD	DLAT	Bcell	0.102653	0.0160261	0.083181	1737
PRAD	DLAT	CD4_T	-0.167384	7.9992e-05	0.000184167	1737
PRAD	DLAT	CD4_naive	0.30158	4.99342e-13	1.47145e-11	1737
PRAD	DLAT	CD8_T	-0.14723	0.000532412	0.0016244	1737
PRAD	DLAT	CD8_naive	0.0908797	0.033099	0.123236	1737
PRAD	DLAT	Central_memory	0.303978	3.19739e-13	1.27496e-12	1737
PRAD	DLAT	Cytotoxic	-0.193831	4.67417e-06	1.9768e-05	1737
PRAD	DLAT	DC	0.202276	1.73116e-06	9.12674e-06	1737
PRAD	DLAT	Effector_memory	-0.0654781	0.125091	0.203576	1737
PRAD	DLAT	Exhausted	-0.137967	0.00117959	0.0041869	1737
PRAD	DLAT	Gamma_delta	-0.226319	8.07897e-08	6.78776e-07	1737
PRAD	DLAT	InfiltrationScore	-0.0962957	0.0239179	0.0522428	1737
PRAD	DLAT	MAIT	-0.0885737	0.0378391	0.0847679	1737
PRAD	DLAT	Macrophage	0.0408795	0.338604	0.464881	1737
PRAD	DLAT	Monocyte	0.169223	6.6521e-05	0.000249137	1737
PRAD	DLAT	NK	-0.320923	1.2177e-14	5.65698e-14	1737
PRAD	DLAT	NKT	-0.293399	2.21466e-12	9.67988e-12	1737
PRAD	DLAT	Neutrophil	0.148963	0.000456418	0.00101355	1737
PRAD	DLAT	Tfh	-0.151689	0.000356965	0.00107394	1737
PRAD	DLAT	Th1	-0.0651955	0.126732	0.265029	1737
PRAD	DLAT	Th17	0.106312	0.0126086	0.0234495	1737
PRAD	DLAT	Th2	-0.0461349	0.28011	0.393058	1737
PRAD	DLAT	Tr1	-0.0263179	0.537953	0.677268	1737
PRAD	DLAT	iTreg	0.21304	4.5859e-07	1.49155e-06	1737
PRAD	DLAT	nTreg	0.259386	6.6036e-10	4.19977e-09	1737
READ	DLAT	Bcell	0.116997	0.234597	0.413352	1737
READ	DLAT	CD4_T	-0.123945	0.207769	0.326939	1737
READ	DLAT	CD4_naive	-0.161761	0.0992309	0.744015	1737
READ	DLAT	CD8_T	-0.0775152	0.431885	0.712374	1737
READ	DLAT	CD8_naive	0.0336969	0.732913	0.86562	1737
READ	DLAT	Central_memory	0.111758	0.256362	0.509067	1737
READ	DLAT	Cytotoxic	-0.110089	0.263576	0.460472	1737
READ	DLAT	DC	-0.0185111	0.851325	0.935892	1737
READ	DLAT	Effector_memory	0.0276751	0.77929	0.918528	1737
READ	DLAT	Exhausted	-0.0577741	0.558272	0.772543	1737
READ	DLAT	Gamma_delta	-0.194305	0.0470138	0.174102	1737
READ	DLAT	InfiltrationScore	-0.0701471	0.477043	0.633366	1737
READ	DLAT	MAIT	0.22798	0.0193339	0.0670376	1737
READ	DLAT	Macrophage	-0.0801302	0.416465	0.610428	1737
READ	DLAT	Monocyte	-0.0937364	0.341548	0.53621	1737
READ	DLAT	NK	-0.0891445	0.365822	0.542028	1737
READ	DLAT	NKT	0.180394	0.0655481	0.21624	1737
READ	DLAT	Neutrophil	0.141807	0.149022	0.285256	1737
READ	DLAT	Tfh	-0.0195895	0.842772	0.910487	1737
READ	DLAT	Th1	0.125667	0.201476	0.461036	1737
READ	DLAT	Th17	-0.0274807	0.780801	0.887852	1737
READ	DLAT	Th2	-0.0469186	0.634588	0.740858	1737
READ	DLAT	Tr1	0.0148897	0.880169	0.951749	1737
READ	DLAT	iTreg	-0.0234933	0.81197	0.899432	1737
READ	DLAT	nTreg	0.0318936	0.746709	0.832278	1737
SARC	DLAT	Bcell	0.0211802	0.73145	0.850284	1737
SARC	DLAT	CD4_T	0.104373	0.0899473	0.158959	1737
SARC	DLAT	CD4_naive	0.215089	0.000421555	0.0016508	1737
SARC	DLAT	CD8_T	-0.131258	0.03269	0.10971	1737
SARC	DLAT	CD8_naive	0.0526292	0.393502	0.524069	1737
SARC	DLAT	Central_memory	0.170003	0.00552725	0.0185494	1737
SARC	DLAT	Cytotoxic	-0.176357	0.00397775	0.0100552	1737
SARC	DLAT	DC	-0.0791768	0.198852	0.281696	1737
SARC	DLAT	Effector_memory	0.0775397	0.208325	0.455888	1737
SARC	DLAT	Exhausted	-0.157941	0.0100207	0.0228238	1737
SARC	DLAT	Gamma_delta	-0.114328	0.0631096	0.211055	1737
SARC	DLAT	InfiltrationScore	-0.272447	6.80939e-06	2.3857e-05	1737
SARC	DLAT	MAIT	-0.0928612	0.13161	0.291854	1737
SARC	DLAT	Macrophage	-0.265205	1.212e-05	3.3736e-05	1737
SARC	DLAT	Monocyte	-0.168136	0.00607557	0.0185012	1737
SARC	DLAT	NK	-0.10204	0.0974062	0.180814	1737
SARC	DLAT	NKT	0.0328061	0.59496	0.736845	1737
SARC	DLAT	Neutrophil	0.0758387	0.21851	0.350666	1737
SARC	DLAT	Tfh	-0.0917162	0.136457	0.24057	1737
SARC	DLAT	Th1	-0.0171006	0.781718	0.86328	1737
SARC	DLAT	Th17	0.0524759	0.394884	0.584154	1737
SARC	DLAT	Th2	0.124394	0.0430436	0.217975	1737
SARC	DLAT	Tr1	0.00268329	0.965323	0.985586	1737
SARC	DLAT	iTreg	-0.133331	0.0300135	0.0700281	1737
SARC	DLAT	nTreg	-0.0442423	0.473276	0.633125	1737
SKCM	DLAT	Bcell	-0.0518076	0.260288	0.453557	1737
SKCM	DLAT	CD4_T	-0.115161	0.0121086	0.0252186	1737
SKCM	DLAT	CD4_naive	0.199536	1.2042e-05	0.000223226	1737
SKCM	DLAT	CD8_T	-0.244786	6.75309e-08	5.33609e-07	1737
SKCM	DLAT	CD8_naive	0.111488	0.015164	0.0417468	1737
SKCM	DLAT	Central_memory	0.121973	0.00785007	0.0181874	1737
SKCM	DLAT	Cytotoxic	-0.17825	9.5475e-05	0.000410631	1737
SKCM	DLAT	DC	0.0835891	0.0690271	0.133112	1737
SKCM	DLAT	Effector_memory	0.0851212	0.0640705	0.136946	1737
SKCM	DLAT	Exhausted	-0.153676	0.000788241	0.00359567	1737
SKCM	DLAT	Gamma_delta	-0.251903	2.70173e-08	1.78937e-07	1737
SKCM	DLAT	InfiltrationScore	-0.179	8.9099e-05	0.000311963	1737
SKCM	DLAT	MAIT	-0.1294	0.00477737	0.0148878	1737
SKCM	DLAT	Macrophage	0.0400585	0.384201	0.533423	1737
SKCM	DLAT	Monocyte	0.250819	3.11185e-08	3.71316e-07	1737
SKCM	DLAT	NK	-0.316751	1.65844e-12	2.17809e-11	1737
SKCM	DLAT	NKT	-0.00969423	0.833273	0.899188	1737
SKCM	DLAT	Neutrophil	0.128966	0.00492147	0.0126376	1737
SKCM	DLAT	Tfh	-0.164608	0.000319594	0.00121743	1737
SKCM	DLAT	Th1	-0.0540207	0.240449	0.400895	1737
SKCM	DLAT	Th17	0.0636117	0.166767	0.263838	1737
SKCM	DLAT	Th2	-0.199765	1.1762e-05	0.00014221	1737
SKCM	DLAT	Tr1	0.106781	0.0200561	0.0989701	1737
SKCM	DLAT	iTreg	0.133166	0.00367828	0.00726331	1737
SKCM	DLAT	nTreg	0.257115	1.35675e-08	2.52197e-07	1737
STAD	DLAT	Bcell	-0.221408	2.10901e-06	1.3275e-05	1737
STAD	DLAT	CD4_T	-0.392549	4.97833e-18	2.95271e-17	1737
STAD	DLAT	CD4_naive	-0.0318493	0.500364	0.659668	1737
STAD	DLAT	CD8_T	-0.129506	0.00593803	0.0187051	1737
STAD	DLAT	CD8_naive	-0.00141434	0.976131	0.981782	1737
STAD	DLAT	Central_memory	0.00531754	0.910436	0.946589	1737
STAD	DLAT	Cytotoxic	-0.000952062	0.983932	0.990369	1737
STAD	DLAT	DC	0.174809	0.000194026	0.000618832	1737
STAD	DLAT	Effector_memory	0.247208	1.08333e-07	8.38782e-07	1737
STAD	DLAT	Exhausted	0.157509	0.000799635	0.00230292	1737
STAD	DLAT	Gamma_delta	-0.135245	0.0040502	0.0119794	1737
STAD	DLAT	InfiltrationScore	-0.126595	0.00717005	0.0204711	1737
STAD	DLAT	MAIT	-0.144019	0.00219438	0.00715855	1737
STAD	DLAT	Macrophage	-0.00706891	0.881128	0.914903	1737
STAD	DLAT	Monocyte	0.150819	0.00133276	0.0045193	1737
STAD	DLAT	NK	-0.246363	1.20058e-07	8.62619e-07	1737
STAD	DLAT	NKT	-0.226762	1.17134e-06	6.59232e-06	1737
STAD	DLAT	Neutrophil	0.311785	1.33377e-11	1.00715e-10	1737
STAD	DLAT	Tfh	-0.278706	1.79436e-09	1.35596e-08	1737
STAD	DLAT	Th1	0.207198	9.36751e-06	3.791e-05	1737
STAD	DLAT	Th17	0.0218078	0.644524	0.756009	1737
STAD	DLAT	Th2	-0.247029	1.10726e-07	5.93663e-07	1737
STAD	DLAT	Tr1	-0.189902	5.031e-05	0.000238802	1737
STAD	DLAT	iTreg	0.019905	0.67367	0.758882	1737
STAD	DLAT	nTreg	0.389331	9.76153e-18	8.84595e-17	1737
TGCT	DLAT	Bcell	-0.439044	9.84495e-09	3.67923e-08	1737
TGCT	DLAT	CD4_T	-0.327507	3.0016e-05	0.000547194	1737
TGCT	DLAT	CD4_naive	0.135143	0.0925526	0.396555	1737
TGCT	DLAT	CD8_T	-0.417031	6.10754e-08	4.25764e-07	1737
TGCT	DLAT	CD8_naive	0.381178	9.14241e-07	5.15821e-06	1737
TGCT	DLAT	Central_memory	-0.353969	5.81079e-06	1.5039e-05	1737
TGCT	DLAT	Cytotoxic	-0.338555	1.54e-05	3.9129e-05	1737
TGCT	DLAT	DC	0.0977974	0.224527	0.414257	1737
TGCT	DLAT	Effector_memory	-0.0309286	0.70151	0.802395	1737
TGCT	DLAT	Exhausted	-0.189552	0.0177883	0.0424525	1737
TGCT	DLAT	Gamma_delta	-0.0272649	0.735467	0.864431	1737
TGCT	DLAT	InfiltrationScore	-0.0460128	0.56842	0.695774	1737
TGCT	DLAT	MAIT	-0.0753799	0.349657	0.438576	1737
TGCT	DLAT	Macrophage	0.265936	0.000792327	0.00369943	1737
TGCT	DLAT	Monocyte	0.3913	4.39717e-07	1.10025e-06	1737
TGCT	DLAT	NK	-0.389111	5.16199e-07	5.52164e-06	1737
TGCT	DLAT	NKT	0.0106644	0.894881	0.915395	1737
TGCT	DLAT	Neutrophil	0.313201	6.861e-05	0.000341684	1737
TGCT	DLAT	Tfh	-0.406412	1.40741e-07	6.05227e-07	1737
TGCT	DLAT	Th1	-0.00912688	0.909967	0.929546	1737
TGCT	DLAT	Th17	0.126668	0.115092	0.155205	1737
TGCT	DLAT	Th2	0.183225	0.0220506	0.0404379	1737
TGCT	DLAT	Tr1	0.00871003	0.914063	0.96269	1737
TGCT	DLAT	iTreg	0.314723	6.2958e-05	0.000387276	1737
TGCT	DLAT	nTreg	0.440863	8.41729e-09	6.00144e-07	1737
THCA	DLAT	Bcell	0.113953	0.00636622	0.0136432	1737
THCA	DLAT	CD4_T	-0.226159	4.54858e-08	2.18578e-07	1737
THCA	DLAT	CD4_naive	0.130669	0.00173767	0.00518454	1737
THCA	DLAT	CD8_T	-0.28915	1.76972e-12	1.8224e-11	1737
THCA	DLAT	CD8_naive	0.104377	0.0124998	0.0287834	1737
THCA	DLAT	Central_memory	0.253815	7.35615e-10	2.39961e-09	1737
THCA	DLAT	Cytotoxic	-0.196508	2.18248e-06	5.52082e-06	1737
THCA	DLAT	DC	-0.00724987	0.86264	0.884545	1737
THCA	DLAT	Effector_memory	-0.0674439	0.107108	0.16544	1737
THCA	DLAT	Exhausted	-0.218282	1.34326e-07	5.20693e-07	1737
THCA	DLAT	Gamma_delta	-0.104534	0.0123673	0.0226815	1737
THCA	DLAT	InfiltrationScore	-0.228952	3.06872e-08	7.69638e-08	1737
THCA	DLAT	MAIT	-0.12318	0.00316914	0.0058159	1737
THCA	DLAT	Macrophage	-0.0221391	0.597224	0.6539	1737
THCA	DLAT	Monocyte	0.0450935	0.281629	0.346256	1737
THCA	DLAT	NK	-0.316969	8.14329e-15	7.39356e-14	1737
THCA	DLAT	NKT	-0.269979	5.19862e-11	1.17388e-09	1737
THCA	DLAT	Neutrophil	0.209223	4.44302e-07	1.1998e-06	1737
THCA	DLAT	Tfh	-0.104128	0.0127128	0.0250937	1737
THCA	DLAT	Th1	-0.0634176	0.129789	0.192188	1737
THCA	DLAT	Th17	0.250501	1.23881e-09	5.68957e-09	1737
THCA	DLAT	Th2	-0.111671	0.00751095	0.0171068	1737
THCA	DLAT	Tr1	-0.0425541	0.309639	0.38358	1737
THCA	DLAT	iTreg	0.00760826	0.855922	0.882082	1737
THCA	DLAT	nTreg	0.0484093	0.247711	0.303561	1737
THYM	DLAT	Bcell	-0.210061	0.0202174	0.0348218	1737
THYM	DLAT	CD4_T	0.136156	0.134813	0.218938	1737
THYM	DLAT	CD4_naive	0.221569	0.0141795	0.0455096	1737
THYM	DLAT	CD8_T	-0.430797	7.30205e-07	2.11211e-06	1737
THYM	DLAT	CD8_naive	0.264902	0.00319131	0.00790886	1737
THYM	DLAT	Central_memory	0.317677	0.000363075	0.00145369	1737
THYM	DLAT	Cytotoxic	-0.328429	0.000221387	0.00121163	1737
THYM	DLAT	DC	-0.259014	0.00396691	0.00866081	1737
THYM	DLAT	Effector_memory	0.15769	0.0827974	0.133365	1737
THYM	DLAT	Exhausted	-0.359624	4.7367e-05	0.000170154	1737
THYM	DLAT	Gamma_delta	-0.375874	1.986e-05	0.000117071	1737
THYM	DLAT	InfiltrationScore	-0.421186	1.35883e-06	1.5635e-05	1737
THYM	DLAT	MAIT	-0.260291	0.00378554	0.0141189	1737
THYM	DLAT	Macrophage	-0.0726095	0.426735	0.517521	1737
THYM	DLAT	Monocyte	0.0449641	0.622874	0.688876	1737
THYM	DLAT	NK	-0.289297	0.0012297	0.0040327	1737
THYM	DLAT	NKT	-0.160056	0.078231	0.122266	1737
THYM	DLAT	Neutrophil	0.146352	0.107716	0.170845	1737
THYM	DLAT	Tfh	-0.298578	0.000836325	0.00185298	1737
THYM	DLAT	Th1	-0.0192094	0.83366	0.911502	1737
THYM	DLAT	Th17	0.12543	0.168636	0.423517	1737
THYM	DLAT	Th2	-0.0950642	0.297611	0.42559	1737
THYM	DLAT	Tr1	0.263738	0.00333278	0.0163399	1737
THYM	DLAT	iTreg	0.502681	3.63327e-09	4.40759e-08	1737
THYM	DLAT	nTreg	0.374235	2.1726e-05	0.000105411	1737
UCEC	DLAT	Bcell	-0.0997771	0.158752	0.300057	1737
UCEC	DLAT	CD4_T	-0.26493	0.000144261	0.000445926	1737
UCEC	DLAT	CD4_naive	-0.0617609	0.383764	0.995559	1737
UCEC	DLAT	CD8_T	-0.212559	0.00244999	0.0138268	1737
UCEC	DLAT	CD8_naive	0.165332	0.0190003	0.061525	1737
UCEC	DLAT	Central_memory	0.203828	0.00370478	0.0094631	1737
UCEC	DLAT	Cytotoxic	-0.16984	0.015934	0.0645906	1737
UCEC	DLAT	DC	0.111956	0.113575	0.196963	1737
UCEC	DLAT	Effector_memory	0.180774	0.0102249	0.0374326	1737
UCEC	DLAT	Exhausted	-0.00980542	0.89012	0.932015	1737
UCEC	DLAT	Gamma_delta	-0.215751	0.00209776	0.0152369	1737
UCEC	DLAT	InfiltrationScore	-0.245859	0.000434703	0.00206401	1737
UCEC	DLAT	MAIT	-0.126402	0.0737671	0.221091	1737
UCEC	DLAT	Macrophage	-0.0113599	0.872838	0.91221	1737
UCEC	DLAT	Monocyte	-0.0174145	0.806168	0.876418	1737
UCEC	DLAT	NK	-0.41795	6.68315e-10	1.4799e-08	1737
UCEC	DLAT	NKT	-0.117284	0.0972886	0.346349	1737
UCEC	DLAT	Neutrophil	0.196645	0.00514342	0.0304169	1737
UCEC	DLAT	Tfh	-0.205505	0.00342619	0.0132943	1737
UCEC	DLAT	Th1	0.122376	0.0835107	0.208808	1737
UCEC	DLAT	Th17	0.0229714	0.746175	0.846446	1737
UCEC	DLAT	Th2	-0.283857	4.4348e-05	0.00046773	1737
UCEC	DLAT	Tr1	0.0886522	0.210756	0.439975	1737
UCEC	DLAT	iTreg	0.318276	4.13463e-06	8.0985e-05	1737
UCEC	DLAT	nTreg	0.344399	5.55022e-07	1.8831e-05	1737
UCS	DLAT	Bcell	0.161228	0.230864	0.619042	1737
UCS	DLAT	CD4_T	0.00521829	0.969269	0.987292	1737
UCS	DLAT	CD4_naive	-0.170572	0.204591	0.643477	1737
UCS	DLAT	CD8_T	-0.132735	0.324974	0.673848	1737
UCS	DLAT	CD8_naive	-0.14354	0.286775	0.628933	1737
UCS	DLAT	Central_memory	0.148312	0.270885	0.696848	1737
UCS	DLAT	Cytotoxic	0.0138436	0.918593	0.987162	1737
UCS	DLAT	DC	-0.0331896	0.806385	0.934368	1737
UCS	DLAT	Effector_memory	0.0324548	0.810591	0.954787	1737
UCS	DLAT	Exhausted	0.103835	0.442101	0.764316	1737
UCS	DLAT	Gamma_delta	-0.19542	0.145175	0.513108	1737
UCS	DLAT	InfiltrationScore	-0.0521471	0.700058	0.922199	1737
UCS	DLAT	MAIT	-0.0876161	0.516933	0.951374	1737
UCS	DLAT	Macrophage	-0.0285858	0.832825	0.954559	1737
UCS	DLAT	Monocyte	-0.122431	0.364261	0.98026	1737
UCS	DLAT	NK	0.069787	0.605968	0.931438	1737
UCS	DLAT	NKT	0.111395	0.409399	0.748865	1737
UCS	DLAT	Neutrophil	-0.0288892	0.831077	0.973674	1737
UCS	DLAT	Tfh	-0.155828	0.247068	0.746743	1737
UCS	DLAT	Th1	-0.105668	0.434043	0.905827	1737
UCS	DLAT	Th17	-0.00220404	0.987018	0.996622	1737
UCS	DLAT	Th2	-0.211649	0.113998	0.652366	1737
UCS	DLAT	Tr1	-0.0062184	0.963383	0.999245	1737
UCS	DLAT	iTreg	0.230099	0.0850863	0.427611	1737
UCS	DLAT	nTreg	0.210502	0.116016	0.558823	1737
UVM	DLAT	Bcell	-0.312503	0.00477004	0.0227485	1737
UVM	DLAT	CD4_T	0.277308	0.0127626	0.0366236	1737
UVM	DLAT	CD4_naive	0.226487	0.0433616	0.146348	1737
UVM	DLAT	CD8_T	0.0855057	0.45077	0.649833	1737
UVM	DLAT	CD8_naive	0.12561	0.266908	0.605942	1737
UVM	DLAT	Central_memory	0.154376	0.171544	0.711977	1737
UVM	DLAT	Cytotoxic	-0.0113348	0.920512	0.963915	1737
UVM	DLAT	DC	-0.0985605	0.384411	0.55192	1737
UVM	DLAT	Effector_memory	0.524891	5.78614e-07	7.59358e-06	1737
UVM	DLAT	Exhausted	0.134616	0.233843	0.421243	1737
UVM	DLAT	Gamma_delta	-0.235945	0.0351188	0.0975141	1737
UVM	DLAT	InfiltrationScore	-0.234112	0.0366042	0.108588	1737
UVM	DLAT	MAIT	0.207851	0.064302	0.150773	1737
UVM	DLAT	Macrophage	-0.167142	0.138371	0.310387	1737
UVM	DLAT	Monocyte	0.0742169	0.512937	0.812743	1737
UVM	DLAT	NK	-0.286372	0.0100166	0.067065	1737
UVM	DLAT	NKT	-0.353348	0.00130405	0.0199619	1737
UVM	DLAT	Neutrophil	-0.244104	0.0291025	0.0700062	1737
UVM	DLAT	Tfh	0.0534468	0.637743	0.799021	1737
UVM	DLAT	Th1	0.365707	0.000850382	0.00437475	1737
UVM	DLAT	Th17	0.0714102	0.529045	0.683127	1737
UVM	DLAT	Th2	0.0215081	0.849804	0.94817	1737
UVM	DLAT	Tr1	0.07201	0.525582	0.76354	1737
UVM	DLAT	iTreg	0.322405	0.00353866	0.0167894	1737
UVM	DLAT	nTreg	0.359487	0.00105678	0.0407402	1737

## Sheet: IDH3B
cancertype	symbol	cell_type	cor	p_value	fdr	entrez
ACC	IDH3B	Bcell	-0.20299	0.0727838	0.201321	3420
ACC	IDH3B	CD4_T	-0.15508	0.172352	0.561071	3420
ACC	IDH3B	CD4_naive	-0.26222	0.0195686	0.102447	3420
ACC	IDH3B	CD8_T	0.183433	0.105628	0.239465	3420
ACC	IDH3B	CD8_naive	-0.0133176	0.907266	0.958314	3420
ACC	IDH3B	Central_memory	0.0208407	0.855345	0.93817	3420
ACC	IDH3B	Cytotoxic	0.171757	0.130141	0.268825	3420
ACC	IDH3B	DC	0.0410953	0.719151	0.889398	3420
ACC	IDH3B	Effector_memory	0.202595	0.0733547	0.412704	3420
ACC	IDH3B	Exhausted	0.0966626	0.396745	0.647009	3420
ACC	IDH3B	Gamma_delta	0.109276	0.337729	0.573439	3420
ACC	IDH3B	InfiltrationScore	0.168093	0.138663	0.316952	3420
ACC	IDH3B	MAIT	0.329513	0.00302301	0.0220302	3420
ACC	IDH3B	Macrophage	0.177429	0.117742	0.354487	3420
ACC	IDH3B	Monocyte	-0.0824239	0.470201	0.814333	3420
ACC	IDH3B	NK	0.192058	0.0899495	0.222665	3420
ACC	IDH3B	NKT	0.129975	0.253589	0.474896	3420
ACC	IDH3B	Neutrophil	-0.300153	0.0071974	0.029499	3420
ACC	IDH3B	Tfh	0.180556	0.111305	0.276248	3420
ACC	IDH3B	Th1	0.267957	0.0169621	0.0666721	3420
ACC	IDH3B	Th17	-0.27988	0.0124854	0.0749393	3420
ACC	IDH3B	Th2	0.223558	0.0476478	0.143623	3420
ACC	IDH3B	Tr1	-0.140132	0.218041	0.785612	3420
ACC	IDH3B	iTreg	0.0799586	0.483626	0.686125	3420
ACC	IDH3B	nTreg	0.292976	0.00878556	0.0823264	3420
BLCA	IDH3B	Bcell	0.0594158	0.220481	0.352425	3420
BLCA	IDH3B	CD4_T	-0.16267	0.000740697	0.00181793	3420
BLCA	IDH3B	CD4_naive	-0.000161446	0.997346	0.998374	3420
BLCA	IDH3B	CD8_T	0.0233376	0.630589	0.790329	3420
BLCA	IDH3B	CD8_naive	-0.0268267	0.580385	0.668757	3420
BLCA	IDH3B	Central_memory	-0.126081	0.0091045	0.0252189	3420
BLCA	IDH3B	Cytotoxic	0.0276005	0.56951	0.646118	3420
BLCA	IDH3B	DC	0.0711268	0.142291	0.208698	3420
BLCA	IDH3B	Effector_memory	0.0929358	0.0549909	0.136878	3420
BLCA	IDH3B	Exhausted	0.0518371	0.285187	0.364798	3420
BLCA	IDH3B	Gamma_delta	0.0952967	0.0490776	0.0961421	3420
BLCA	IDH3B	InfiltrationScore	0.0423347	0.382865	0.459653	3420
BLCA	IDH3B	MAIT	-0.0422832	0.383444	0.661001	3420
BLCA	IDH3B	Macrophage	0.0511149	0.291961	0.361994	3420
BLCA	IDH3B	Monocyte	0.0364253	0.452813	0.59877	3420
BLCA	IDH3B	NK	0.00521497	0.914434	0.937753	3420
BLCA	IDH3B	NKT	0.00761356	0.875349	0.908976	3420
BLCA	IDH3B	Neutrophil	0.0356044	0.463068	0.561541	3420
BLCA	IDH3B	Tfh	-0.0372335	0.442842	0.586576	3420
BLCA	IDH3B	Th1	0.0598741	0.216935	0.297945	3420
BLCA	IDH3B	Th17	-0.182622	0.00014789	0.000659195	3420
BLCA	IDH3B	Th2	-0.0335011	0.489923	0.597341	3420
BLCA	IDH3B	Tr1	-0.0382477	0.430509	0.586476	3420
BLCA	IDH3B	iTreg	-0.130843	0.00677983	0.0145085	3420
BLCA	IDH3B	nTreg	-0.0691084	0.153992	0.27621	3420
BRCA	IDH3B	Bcell	0.104302	0.000265994	0.000546243	3420
BRCA	IDH3B	CD4_T	-0.0516854	0.0713621	0.0938786	3420
BRCA	IDH3B	CD4_naive	-0.0214149	0.455248	0.846084	3420
BRCA	IDH3B	CD8_T	0.179963	2.51671e-10	1.22588e-09	3420
BRCA	IDH3B	CD8_naive	-0.0153713	0.592002	0.653209	3420
BRCA	IDH3B	Central_memory	-0.123076	1.6525e-05	4.1025e-05	3420
BRCA	IDH3B	Cytotoxic	0.116875	4.337e-05	9.5374e-05	3420
BRCA	IDH3B	DC	0.0269513	0.34732	0.405445	3420
BRCA	IDH3B	Effector_memory	0.142074	6.40666e-07	2.06675e-06	3420
BRCA	IDH3B	Exhausted	0.110044	0.000118951	0.000246137	3420
BRCA	IDH3B	Gamma_delta	0.098253	0.000595169	0.00120696	3420
BRCA	IDH3B	InfiltrationScore	0.12304	1.6621e-05	3.7356e-05	3420
BRCA	IDH3B	MAIT	-0.0895515	0.00175752	0.00474387	3420
BRCA	IDH3B	Macrophage	0.00049226	0.986307	0.989307	3420
BRCA	IDH3B	Monocyte	-0.0275101	0.337411	0.424313	3420
BRCA	IDH3B	NK	0.0658049	0.0216351	0.0306502	3420
BRCA	IDH3B	NKT	0.0655474	0.0221546	0.0330994	3420
BRCA	IDH3B	Neutrophil	-0.035354	0.217588	0.284623	3420
BRCA	IDH3B	Tfh	0.0729071	0.0109209	0.0173686	3420
BRCA	IDH3B	Th1	0.128902	6.39496e-06	1.7062e-05	3420
BRCA	IDH3B	Th17	-0.157688	3.1607e-08	8.59124e-08	3420
BRCA	IDH3B	Th2	-0.0396834	0.166338	0.246063	3420
BRCA	IDH3B	Tr1	-0.0735842	0.0102014	0.0186447	3420
BRCA	IDH3B	iTreg	-0.0495589	0.0838296	0.113143	3420
BRCA	IDH3B	nTreg	-0.0956254	0.000833137	0.00172554	3420
CESC	IDH3B	Bcell	0.204784	0.000283893	0.00274958	3420
CESC	IDH3B	CD4_T	-0.0596786	0.294897	0.407312	3420
CESC	IDH3B	CD4_naive	-0.0642167	0.259638	0.538922	3420
CESC	IDH3B	CD8_T	0.19128	0.000710365	0.00354332	3420
CESC	IDH3B	CD8_naive	0.0169864	0.765787	0.826949	3420
CESC	IDH3B	Central_memory	0.00133545	0.981317	0.988181	3420
CESC	IDH3B	Cytotoxic	0.150473	0.00795989	0.0243795	3420
CESC	IDH3B	DC	0.162348	0.0041579	0.0116765	3420
CESC	IDH3B	Effector_memory	-0.00977212	0.863937	0.93927	3420
CESC	IDH3B	Exhausted	0.0833584	0.143113	0.254294	3420
CESC	IDH3B	Gamma_delta	0.173839	0.00212767	0.0116727	3420
CESC	IDH3B	InfiltrationScore	0.209658	0.000200889	0.000877113	3420
CESC	IDH3B	MAIT	0.0473143	0.406452	0.622774	3420
CESC	IDH3B	Macrophage	0.184065	0.00113167	0.00461368	3420
CESC	IDH3B	Monocyte	-0.108275	0.0568731	0.202329	3420
CESC	IDH3B	NK	0.0629753	0.268981	0.423162	3420
CESC	IDH3B	NKT	-0.14832	0.00891305	0.0484201	3420
CESC	IDH3B	Neutrophil	-0.14569	0.0102141	0.0360869	3420
CESC	IDH3B	Tfh	0.146228	0.00993503	0.0363533	3420
CESC	IDH3B	Th1	0.0944526	0.0969134	0.196689	3420
CESC	IDH3B	Th17	-0.263393	2.57548e-06	3.4335e-05	3420
CESC	IDH3B	Th2	0.0130313	0.81924	0.903978	3420
CESC	IDH3B	Tr1	0.0951097	0.0946022	0.232403	3420
CESC	IDH3B	iTreg	-0.0857788	0.131819	0.223161	3420
CESC	IDH3B	nTreg	-0.146512	0.00979061	0.0397367	3420
CHOL	IDH3B	Bcell	0.379613	0.0101133	0.048354	3420
CHOL	IDH3B	CD4_T	-0.0753312	0.622849	0.801474	3420
CHOL	IDH3B	CD4_naive	-0.0237853	0.876751	0.963884	3420
CHOL	IDH3B	CD8_T	0.00408513	0.978753	0.995259	3420
CHOL	IDH3B	CD8_naive	-0.00179595	0.990658	0.993812	3420
CHOL	IDH3B	Central_memory	-0.240866	0.110964	0.524888	3420
CHOL	IDH3B	Cytotoxic	-0.160572	0.292023	0.737486	3420
CHOL	IDH3B	DC	0.021674	0.887618	0.95656	3420
CHOL	IDH3B	Effector_memory	0.172711	0.256572	0.464584	3420
CHOL	IDH3B	Exhausted	-0.196317	0.196186	0.93471	3420
CHOL	IDH3B	Gamma_delta	0.110958	0.468065	0.789624	3420
CHOL	IDH3B	InfiltrationScore	0.014033	0.927102	0.957438	3420
CHOL	IDH3B	MAIT	0.0570751	0.709594	0.824519	3420
CHOL	IDH3B	Macrophage	-0.258589	0.0863149	0.181982	3420
CHOL	IDH3B	Monocyte	-0.0249077	0.870983	0.913733	3420
CHOL	IDH3B	NK	0.0475704	0.756327	0.857949	3420
CHOL	IDH3B	NKT	-0.105591	0.489989	0.781295	3420
CHOL	IDH3B	Neutrophil	0.147885	0.332312	0.768289	3420
CHOL	IDH3B	Tfh	-0.191089	0.208603	0.396543	3420
CHOL	IDH3B	Th1	-0.150208	0.324688	0.613038	3420
CHOL	IDH3B	Th17	-0.120499	0.430424	0.552227	3420
CHOL	IDH3B	Th2	-0.0147606	0.923333	0.992335	3420
CHOL	IDH3B	Tr1	-0.225409	0.136547	0.308071	3420
CHOL	IDH3B	iTreg	-0.109836	0.472607	0.791093	3420
CHOL	IDH3B	nTreg	0.246427	0.102714	0.196342	3420
COAD	IDH3B	Bcell	0.0553478	0.316892	0.407644	3420
COAD	IDH3B	CD4_T	-0.0787686	0.154009	0.204767	3420
COAD	IDH3B	CD4_naive	0.000405248	0.994157	0.997295	3420
COAD	IDH3B	CD8_T	0.0873673	0.113719	0.193983	3420
COAD	IDH3B	CD8_naive	-0.0110381	0.841905	0.885755	3420
COAD	IDH3B	Central_memory	0.011203	0.839576	0.909042	3420
COAD	IDH3B	Cytotoxic	0.0286806	0.604218	0.683878	3420
COAD	IDH3B	DC	-0.100511	0.0686411	0.134838	3420
COAD	IDH3B	Effector_memory	0.131338	0.0171481	0.0479123	3420
COAD	IDH3B	Exhausted	-0.077272	0.16201	0.250621	3420
COAD	IDH3B	Gamma_delta	-0.0242139	0.661682	0.761731	3420
COAD	IDH3B	InfiltrationScore	-0.0778436	0.158918	0.216038	3420
COAD	IDH3B	MAIT	0.130284	0.0180672	0.0310533	3420
COAD	IDH3B	Macrophage	-0.126229	0.0220191	0.048502	3420
COAD	IDH3B	Monocyte	-0.152899	0.00545022	0.0119105	3420
COAD	IDH3B	NK	0.0860061	0.11948	0.162326	3420
COAD	IDH3B	NKT	0.0651646	0.238504	0.325474	3420
COAD	IDH3B	Neutrophil	-0.00751858	0.891934	0.923031	3420
COAD	IDH3B	Tfh	0.0472788	0.392676	0.477526	3420
COAD	IDH3B	Th1	0.062139	0.261057	0.399929	3420
COAD	IDH3B	Th17	0.059944	0.27831	0.391352	3420
COAD	IDH3B	Th2	-0.0381484	0.490467	0.559102	3420
COAD	IDH3B	Tr1	-0.0533527	0.334678	0.449631	3420
COAD	IDH3B	iTreg	-0.0892268	0.106204	0.179063	3420
COAD	IDH3B	nTreg	-0.0109162	0.843628	0.87641	3420
DLBC	IDH3B	Bcell	0.371794	0.00926895	0.0533178	3420
DLBC	IDH3B	CD4_T	-0.385572	0.00680114	0.0431899	3420
DLBC	IDH3B	CD4_naive	-0.209708	0.152555	0.533223	3420
DLBC	IDH3B	CD8_T	0.205968	0.160175	0.357273	3420
DLBC	IDH3B	CD8_naive	-0.144917	0.325732	0.735504	3420
DLBC	IDH3B	Central_memory	-0.710497	1.54167e-08	3.63093e-07	3420
DLBC	IDH3B	Cytotoxic	0.0322915	0.827521	0.955527	3420
DLBC	IDH3B	DC	0.370969	0.00943841	0.108773	3420
DLBC	IDH3B	Effector_memory	0.314268	0.0296027	0.162737	3420
DLBC	IDH3B	Exhausted	0.196864	0.179879	0.559238	3420
DLBC	IDH3B	Gamma_delta	0.32918	0.0223368	0.142801	3420
DLBC	IDH3B	InfiltrationScore	0.52767	0.000116192	0.00308999	3420
DLBC	IDH3B	MAIT	0.158143	0.283028	0.598617	3420
DLBC	IDH3B	Macrophage	0.174678	0.235047	0.603486	3420
DLBC	IDH3B	Monocyte	0.0481051	0.74542	0.935897	3420
DLBC	IDH3B	NK	0.451846	0.00126472	0.012548	3420
DLBC	IDH3B	NKT	0.162879	0.268674	0.839276	3420
DLBC	IDH3B	Neutrophil	-0.077253	0.601742	0.846099	3420
DLBC	IDH3B	Tfh	-0.0971332	0.511325	0.868236	3420
DLBC	IDH3B	Th1	0.463088	0.000918267	0.0162011	3420
DLBC	IDH3B	Th17	-0.472706	0.000692199	0.00512402	3420
DLBC	IDH3B	Th2	0.31332	0.0301241	0.124511	3420
DLBC	IDH3B	Tr1	-0.429518	0.00231491	0.0490814	3420
DLBC	IDH3B	iTreg	-0.61564	3.20637e-06	4.2297e-05	3420
DLBC	IDH3B	nTreg	-0.300529	0.0379409	0.280939	3420
ESCA	IDH3B	Bcell	-0.0506842	0.480503	0.61854	3420
ESCA	IDH3B	CD4_T	-0.240686	0.000678446	0.00182869	3420
ESCA	IDH3B	CD4_naive	-0.123404	0.084854	0.848993	3420
ESCA	IDH3B	CD8_T	0.0810221	0.258936	0.540754	3420
ESCA	IDH3B	CD8_naive	0.0837353	0.243273	0.475959	3420
ESCA	IDH3B	Central_memory	-0.143807	0.0443378	0.106	3420
ESCA	IDH3B	Cytotoxic	-0.0407463	0.57069	0.778361	3420
ESCA	IDH3B	DC	-0.0215249	0.764593	0.830032	3420
ESCA	IDH3B	Effector_memory	0.246512	0.000495819	0.030263	3420
ESCA	IDH3B	Exhausted	0.0413189	0.565285	0.770281	3420
ESCA	IDH3B	Gamma_delta	0.0105269	0.883575	0.929297	3420
ESCA	IDH3B	InfiltrationScore	-0.103626	0.148352	0.313251	3420
ESCA	IDH3B	MAIT	0.12441	0.0823237	0.173275	3420
ESCA	IDH3B	Macrophage	-0.0426598	0.552721	0.698558	3420
ESCA	IDH3B	Monocyte	-0.136966	0.0555826	0.191473	3420
ESCA	IDH3B	NK	-0.08851	0.217338	0.381205	3420
ESCA	IDH3B	NKT	-0.00259613	0.971192	0.987345	3420
ESCA	IDH3B	Neutrophil	0.172397	0.0156817	0.0450905	3420
ESCA	IDH3B	Tfh	-0.126144	0.07811	0.139131	3420
ESCA	IDH3B	Th1	0.0817292	0.254788	0.527895	3420
ESCA	IDH3B	Th17	-0.0762372	0.288217	0.43549	3420
ESCA	IDH3B	Th2	0.00832007	0.90786	0.944639	3420
ESCA	IDH3B	Tr1	-0.189495	0.00781147	0.0314462	3420
ESCA	IDH3B	iTreg	-0.125457	0.0797584	0.222969	3420
ESCA	IDH3B	nTreg	0.099775	0.164107	0.257697	3420
GBM	IDH3B	Bcell	0.157448	0.0379983	0.0899285	3420
GBM	IDH3B	CD4_T	-0.120041	0.114624	0.193609	3420
GBM	IDH3B	CD4_naive	0.103843	0.172694	0.273316	3420
GBM	IDH3B	CD8_T	0.165052	0.0295225	0.0932403	3420
GBM	IDH3B	CD8_naive	0.340159	4.38255e-06	4.428e-05	3420
GBM	IDH3B	Central_memory	-0.0471221	0.536941	0.714543	3420
GBM	IDH3B	Cytotoxic	-0.0896791	0.239277	0.409302	3420
GBM	IDH3B	DC	-0.133588	0.0788607	0.167059	3420
GBM	IDH3B	Effector_memory	0.0938366	0.218103	0.354489	3420
GBM	IDH3B	Exhausted	-0.0485009	0.52508	0.662947	3420
GBM	IDH3B	Gamma_delta	0.109052	0.152029	0.313508	3420
GBM	IDH3B	InfiltrationScore	-0.226524	0.00264976	0.0104779	3420
GBM	IDH3B	MAIT	-0.0269634	0.723959	0.816478	3420
GBM	IDH3B	Macrophage	-0.24865	0.000938329	0.00277784	3420
GBM	IDH3B	Monocyte	-0.266717	0.00037434	0.00274093	3420
GBM	IDH3B	NK	-0.0810667	0.287607	0.436168	3420
GBM	IDH3B	NKT	-0.0742336	0.330308	0.617779	3420
GBM	IDH3B	Neutrophil	0.0583736	0.44421	0.582462	3420
GBM	IDH3B	Tfh	-0.151709	0.0456795	0.158263	3420
GBM	IDH3B	Th1	-0.0774594	0.309666	0.556957	3420
GBM	IDH3B	Th17	-0.239578	0.00145266	0.0109853	3420
GBM	IDH3B	Th2	-0.000632156	0.993395	0.996035	3420
GBM	IDH3B	Tr1	0.00485022	0.949354	0.980263	3420
GBM	IDH3B	iTreg	-0.164689	0.0298862	0.141967	3420
GBM	IDH3B	nTreg	-0.0999633	0.189388	0.37289	3420
HNSC	IDH3B	Bcell	0.0474234	0.260006	0.350858	3420
HNSC	IDH3B	CD4_T	-0.0883424	0.0356237	0.0523306	3420
HNSC	IDH3B	CD4_naive	0.0172898	0.681469	0.854192	3420
HNSC	IDH3B	CD8_T	0.112032	0.00763417	0.020609	3420
HNSC	IDH3B	CD8_naive	-0.0742277	0.0776538	0.138885	3420
HNSC	IDH3B	Central_memory	-0.195877	2.66203e-06	8.62407e-06	3420
HNSC	IDH3B	Cytotoxic	0.0658067	0.117859	0.193796	3420
HNSC	IDH3B	DC	-0.016432	0.696468	0.763535	3420
HNSC	IDH3B	Effector_memory	0.153693	0.000242337	0.000648896	3420
HNSC	IDH3B	Exhausted	0.0658117	0.11783	0.184553	3420
HNSC	IDH3B	Gamma_delta	0.133512	0.00145461	0.00304666	3420
HNSC	IDH3B	InfiltrationScore	0.0247961	0.55606	0.662624	3420
HNSC	IDH3B	MAIT	0.0942846	0.0248876	0.0502546	3420
HNSC	IDH3B	Macrophage	-0.0253392	0.547438	0.655064	3420
HNSC	IDH3B	Monocyte	-0.065284	0.120811	0.212616	3420
HNSC	IDH3B	NK	0.110912	0.00826609	0.0202065	3420
HNSC	IDH3B	NKT	-0.0126287	0.764333	0.828862	3420
HNSC	IDH3B	Neutrophil	-0.0221714	0.59863	0.670257	3420
HNSC	IDH3B	Tfh	0.034349	0.414716	0.491632	3420
HNSC	IDH3B	Th1	0.0779577	0.0638261	0.107515	3420
HNSC	IDH3B	Th17	-0.0762627	0.0698352	0.125616	3420
HNSC	IDH3B	Th2	0.08982	0.0326402	0.0705371	3420
HNSC	IDH3B	Tr1	-0.271417	5.14736e-11	3.30482e-10	3420
HNSC	IDH3B	iTreg	-0.238383	9.36973e-09	3.75311e-08	3420
HNSC	IDH3B	nTreg	-0.114109	0.00657541	0.0161604	3420
KICH	IDH3B	Bcell	0.43575	1.5807e-05	9.165e-05	3420
KICH	IDH3B	CD4_T	-0.191871	0.0684546	0.396972	3420
KICH	IDH3B	CD4_naive	0.220693	0.0355383	0.120288	3420
KICH	IDH3B	CD8_T	-0.00496149	0.962772	0.98476	3420
KICH	IDH3B	CD8_naive	0.354456	0.000566458	0.00347045	3420
KICH	IDH3B	Central_memory	0.0483171	0.649246	0.740014	3420
KICH	IDH3B	Cytotoxic	0.104481	0.324327	0.47868	3420
KICH	IDH3B	DC	0.114116	0.28145	0.379414	3420
KICH	IDH3B	Effector_memory	-0.0865004	0.41491	0.63894	3420
KICH	IDH3B	Exhausted	-0.350143	0.000668065	0.00238448	3420
KICH	IDH3B	Gamma_delta	-0.247572	0.0179813	0.0435881	3420
KICH	IDH3B	InfiltrationScore	0.039093	0.712941	0.835267	3420
KICH	IDH3B	MAIT	0.113847	0.282592	0.515348	3420
KICH	IDH3B	Macrophage	-0.00320131	0.975974	0.983897	3420
KICH	IDH3B	Monocyte	-0.0766241	0.470353	0.902154	3420
KICH	IDH3B	NK	-0.0705643	0.506265	0.659398	3420
KICH	IDH3B	NKT	-0.498395	4.97168e-07	3.07065e-06	3420
KICH	IDH3B	Neutrophil	0.125238	0.23687	0.439895	3420
KICH	IDH3B	Tfh	-0.303078	0.00349777	0.0172449	3420
KICH	IDH3B	Th1	-0.0829053	0.434638	0.816984	3420
KICH	IDH3B	Th17	-0.219539	0.036537	0.06312	3420
KICH	IDH3B	Th2	-0.14142	0.181176	0.259581	3420
KICH	IDH3B	Tr1	-0.287871	0.00565784	0.0731887	3420
KICH	IDH3B	iTreg	-0.374796	0.000251944	0.00509943	3420
KICH	IDH3B	nTreg	-0.0886481	0.403377	0.562471	3420
KIRC	IDH3B	Bcell	-0.0115881	0.775885	0.883957	3420
KIRC	IDH3B	CD4_T	-0.244573	1.05325e-09	5.46965e-09	3420
KIRC	IDH3B	CD4_naive	0.0214979	0.597372	0.636891	3420
KIRC	IDH3B	CD8_T	0.0603541	0.137802	0.170708	3420
KIRC	IDH3B	CD8_naive	0.0704195	0.0832568	0.127662	3420
KIRC	IDH3B	Central_memory	-0.242562	1.45385e-09	7.14072e-09	3420
KIRC	IDH3B	Cytotoxic	-0.0471151	0.24683	0.292183	3420
KIRC	IDH3B	DC	-0.0473586	0.244393	0.311066	3420
KIRC	IDH3B	Effector_memory	0.12002	0.0030849	0.0143394	3420
KIRC	IDH3B	Exhausted	-0.0701739	0.0843406	0.115878	3420
KIRC	IDH3B	Gamma_delta	0.135201	0.000847724	0.00170129	3420
KIRC	IDH3B	InfiltrationScore	-0.0450906	0.267745	0.32521	3420
KIRC	IDH3B	MAIT	0.0474178	0.243803	0.34121	3420
KIRC	IDH3B	Macrophage	-0.0803834	0.0479377	0.0721739	3420
KIRC	IDH3B	Monocyte	-0.0552692	0.174211	0.245166	3420
KIRC	IDH3B	NK	0.0718076	0.0773417	0.102448	3420
KIRC	IDH3B	NKT	-0.149487	0.000221528	0.000737111	3420
KIRC	IDH3B	Neutrophil	0.117857	0.00366748	0.0056073	3420
KIRC	IDH3B	Tfh	-0.0847883	0.0369162	0.0501856	3420
KIRC	IDH3B	Th1	-0.111981	0.00578675	0.00944561	3420
KIRC	IDH3B	Th17	0.145043	0.000340802	0.000631755	3420
KIRC	IDH3B	Th2	0.130261	0.00131029	0.00318513	3420
KIRC	IDH3B	Tr1	-0.21407	1.0337e-07	6.83685e-07	3420
KIRC	IDH3B	iTreg	-0.244506	1.06459e-09	4.14562e-09	3420
KIRC	IDH3B	nTreg	-0.191317	2.09728e-06	6.7905e-06	3420
KIRP	IDH3B	Bcell	-0.0749822	0.178863	0.353263	3420
KIRP	IDH3B	CD4_T	-0.34082	3.1567e-10	2.95616e-09	3420
KIRP	IDH3B	CD4_naive	-0.175916	0.00150284	0.00363805	3420
KIRP	IDH3B	CD8_T	0.0289051	0.60475	0.698089	3420
KIRP	IDH3B	CD8_naive	-0.0884068	0.112782	0.19384	3420
KIRP	IDH3B	Central_memory	-0.269456	8.87138e-07	4.55199e-06	3420
KIRP	IDH3B	Cytotoxic	0.0188298	0.736019	0.807257	3420
KIRP	IDH3B	DC	0.201949	0.000259089	0.000798953	3420
KIRP	IDH3B	Effector_memory	0.080474	0.149012	0.238586	3420
KIRP	IDH3B	Exhausted	0.156933	0.00469802	0.0114252	3420
KIRP	IDH3B	Gamma_delta	0.234079	2.1396e-05	0.000100209	3420
KIRP	IDH3B	InfiltrationScore	0.142326	0.0104356	0.0203247	3420
KIRP	IDH3B	MAIT	0.00151085	0.978421	0.986598	3420
KIRP	IDH3B	Macrophage	0.245384	8.14274e-06	3.688e-05	3420
KIRP	IDH3B	Monocyte	0.18844	0.000663812	0.00188595	3420
KIRP	IDH3B	NK	-0.0594247	0.28697	0.391478	3420
KIRP	IDH3B	NKT	-0.109532	0.0492035	0.114766	3420
KIRP	IDH3B	Neutrophil	0.0829708	0.136763	0.214912	3420
KIRP	IDH3B	Tfh	-0.161678	0.00357252	0.011171	3420
KIRP	IDH3B	Th1	0.00679827	0.903131	0.938078	3420
KIRP	IDH3B	Th17	-0.193365	0.00047448	0.00122781	3420
KIRP	IDH3B	Th2	0.143808	0.00965392	0.0555709	3420
KIRP	IDH3B	Tr1	-0.0752428	0.177353	0.371498	3420
KIRP	IDH3B	iTreg	-0.361872	1.9854e-11	7.92503e-10	3420
KIRP	IDH3B	nTreg	-0.240691	1.2231e-05	0.000193055	3420
LAML	IDH3B	Bcell	-0.0637875	0.404416	0.561139	3420
LAML	IDH3B	CD4_T	0.100739	0.187248	0.293008	3420
LAML	IDH3B	CD4_naive	0.0615048	0.421474	0.968369	3420
LAML	IDH3B	CD8_T	0.266901	0.000385666	0.0018577	3420
LAML	IDH3B	CD8_naive	-0.0161155	0.833322	0.931938	3420
LAML	IDH3B	Central_memory	-0.240565	0.00143184	0.00440586	3420
LAML	IDH3B	Cytotoxic	0.202348	0.00758834	0.0332086	3420
LAML	IDH3B	DC	-0.196728	0.00948112	0.0340093	3420
LAML	IDH3B	Effector_memory	0.147913	0.0521267	0.171678	3420
LAML	IDH3B	Exhausted	0.250629	0.000881452	0.00713775	3420
LAML	IDH3B	Gamma_delta	0.146723	0.0540684	0.146904	3420
LAML	IDH3B	InfiltrationScore	-0.0213768	0.780121	0.84291	3420
LAML	IDH3B	MAIT	0.054764	0.474224	0.699397	3420
LAML	IDH3B	Macrophage	-0.0365779	0.632807	0.709941	3420
LAML	IDH3B	Monocyte	-0.0291506	0.703412	0.769878	3420
LAML	IDH3B	NK	0.129817	0.0886986	0.180951	3420
LAML	IDH3B	NKT	0.0968816	0.204789	0.301602	3420
LAML	IDH3B	Neutrophil	-0.221613	0.00338685	0.0109978	3420
LAML	IDH3B	Tfh	0.112074	0.142093	0.317515	3420
LAML	IDH3B	Th1	0.0553645	0.469384	0.711293	3420
LAML	IDH3B	Th17	-0.213795	0.00473716	0.0414989	3420
LAML	IDH3B	Th2	0.0252282	0.741799	0.867498	3420
LAML	IDH3B	Tr1	0.211226	0.00527661	0.0207305	3420
LAML	IDH3B	iTreg	-0.0271659	0.722749	0.831284	3420
LAML	IDH3B	nTreg	-0.12464	0.102284	0.236538	3420
LGG	IDH3B	Bcell	0.0310308	0.47426	0.550736	3420
LGG	IDH3B	CD4_T	-0.00494808	0.909178	0.930055	3420
LGG	IDH3B	CD4_naive	0.0425124	0.326821	0.518803	3420
LGG	IDH3B	CD8_T	0.0836911	0.0532571	0.0914409	3420
LGG	IDH3B	CD8_naive	0.232675	5.35857e-08	2.63174e-07	3420
LGG	IDH3B	Central_memory	-0.241531	1.58381e-08	5.96809e-08	3420
LGG	IDH3B	Cytotoxic	-0.0258625	0.550948	0.625863	3420
LGG	IDH3B	DC	-0.0668925	0.122615	0.169727	3420
LGG	IDH3B	Effector_memory	0.103103	0.017157	0.0312159	3420
LGG	IDH3B	Exhausted	-0.0700145	0.106069	0.148037	3420
LGG	IDH3B	Gamma_delta	0.0494123	0.254344	0.341095	3420
LGG	IDH3B	InfiltrationScore	-0.0285645	0.510109	0.573604	3420
LGG	IDH3B	MAIT	-0.107265	0.0131353	0.0225646	3420
LGG	IDH3B	Macrophage	-0.0873822	0.0435499	0.0629726	3420
LGG	IDH3B	Monocyte	-0.0245659	0.571098	0.630121	3420
LGG	IDH3B	NK	0.0812607	0.0605851	0.102018	3420
LGG	IDH3B	NKT	0.0416001	0.337319	0.486046	3420
LGG	IDH3B	Neutrophil	0.046855	0.279786	0.368283	3420
LGG	IDH3B	Tfh	-0.0801687	0.0641389	0.109675	3420
LGG	IDH3B	Th1	-0.129374	0.00274243	0.00540046	3420
LGG	IDH3B	Th17	-0.128099	0.00302243	0.00925428	3420
LGG	IDH3B	Th2	-0.126555	0.00339584	0.00657377	3420
LGG	IDH3B	Tr1	0.111477	0.00993527	0.0257706	3420
LGG	IDH3B	iTreg	-0.139084	0.00127226	0.0132942	3420
LGG	IDH3B	nTreg	-0.0523296	0.227337	0.42144	3420
LIHC	IDH3B	Bcell	0.142179	0.00334706	0.00646469	3420
LIHC	IDH3B	CD4_T	-0.202114	2.7547e-05	0.000106515	3420
LIHC	IDH3B	CD4_naive	-0.295007	5.82748e-10	4.29041e-09	3420
LIHC	IDH3B	CD8_T	0.15365	0.00150677	0.00461334	3420
LIHC	IDH3B	CD8_naive	0.0468375	0.335987	0.493861	3420
LIHC	IDH3B	Central_memory	-0.230113	1.67828e-06	7.43171e-06	3420
LIHC	IDH3B	Cytotoxic	0.110607	0.0227376	0.0669954	3420
LIHC	IDH3B	DC	0.0762919	0.116742	0.20333	3420
LIHC	IDH3B	Effector_memory	0.236725	8.20939e-07	1.0415e-05	3420
LIHC	IDH3B	Exhausted	0.0872001	0.0728647	0.150283	3420
LIHC	IDH3B	Gamma_delta	0.0738809	0.128791	0.25098	3420
LIHC	IDH3B	InfiltrationScore	0.0746215	0.124992	0.191875	3420
LIHC	IDH3B	MAIT	-0.0145764	0.76473	0.825912	3420
LIHC	IDH3B	Macrophage	0.00966528	0.842703	0.883312	3420
LIHC	IDH3B	Monocyte	-0.0739677	0.128342	0.203654	3420
LIHC	IDH3B	NK	0.0834675	0.0860479	0.139873	3420
LIHC	IDH3B	NKT	0.0621447	0.201569	0.290443	3420
LIHC	IDH3B	Neutrophil	-0.00834464	0.86397	0.906031	3420
LIHC	IDH3B	Tfh	-0.10124	0.0371723	0.0741853	3420
LIHC	IDH3B	Th1	0.0816711	0.0930442	0.205712	3420
LIHC	IDH3B	Th17	-0.0838275	0.0846982	0.12478	3420
LIHC	IDH3B	Th2	0.0435	0.37159	0.532709	3420
LIHC	IDH3B	Tr1	0.0548431	0.259826	0.378976	3420
LIHC	IDH3B	iTreg	-0.219978	4.82202e-06	1.9004e-05	3420
LIHC	IDH3B	nTreg	0.0142455	0.769918	0.823655	3420
LUAD	IDH3B	Bcell	0.0692635	0.0967723	0.16521	3420
LUAD	IDH3B	CD4_T	-0.15047	0.000289994	0.000598884	3420
LUAD	IDH3B	CD4_naive	0.0300064	0.472295	0.70362	3420
LUAD	IDH3B	CD8_T	0.098162	0.0184498	0.0456141	3420
LUAD	IDH3B	CD8_naive	0.0313737	0.452341	0.561182	3420
LUAD	IDH3B	Central_memory	-0.0995703	0.0168282	0.0419618	3420
LUAD	IDH3B	Cytotoxic	-0.0536425	0.1986	0.303744	3420
LUAD	IDH3B	DC	-0.119316	0.00413568	0.0125733	3420
LUAD	IDH3B	Effector_memory	0.172219	3.2478e-05	9.0313e-05	3420
LUAD	IDH3B	Exhausted	-0.00876096	0.833816	0.871975	3420
LUAD	IDH3B	Gamma_delta	0.0690878	0.0976238	0.157823	3420
LUAD	IDH3B	InfiltrationScore	-0.160688	0.00010736	0.000270598	3420
LUAD	IDH3B	MAIT	0.057406	0.168857	0.221351	3420
LUAD	IDH3B	Macrophage	-0.171686	3.4384e-05	0.000113817	3420
LUAD	IDH3B	Monocyte	-0.0630837	0.130476	0.23902	3420
LUAD	IDH3B	NK	-0.0114487	0.783946	0.830516	3420
LUAD	IDH3B	NKT	-0.0694689	0.095784	0.131095	3420
LUAD	IDH3B	Neutrophil	0.0281038	0.500846	0.637796	3420
LUAD	IDH3B	Tfh	-0.0469984	0.260109	0.331801	3420
LUAD	IDH3B	Th1	0.0504724	0.22648	0.315371	3420
LUAD	IDH3B	Th17	-0.00184872	0.964687	0.974449	3420
LUAD	IDH3B	Th2	0.00267406	0.94894	0.963247	3420
LUAD	IDH3B	Tr1	-0.0857629	0.0396257	0.0858469	3420
LUAD	IDH3B	iTreg	-0.116911	0.00496342	0.011395	3420
LUAD	IDH3B	nTreg	0.0681952	0.102042	0.133295	3420
LUSC	IDH3B	Bcell	0.10031	0.0181944	0.0530813	3420
LUSC	IDH3B	CD4_T	-0.165795	8.829e-05	0.00016606	3420
LUSC	IDH3B	CD4_naive	0.0301944	0.47817	0.815773	3420
LUSC	IDH3B	CD8_T	0.064605	0.12882	0.26104	3420
LUSC	IDH3B	CD8_naive	0.156768	0.000211833	0.000514749	3420
LUSC	IDH3B	Central_memory	-0.0348239	0.413326	0.572668	3420
LUSC	IDH3B	Cytotoxic	-0.211519	5.05354e-07	1.61356e-06	3420
LUSC	IDH3B	DC	-0.040495	0.341413	0.461531	3420
LUSC	IDH3B	Effector_memory	0.254109	1.30016e-09	5.61441e-09	3420
LUSC	IDH3B	Exhausted	-0.038441	0.366482	0.504998	3420
LUSC	IDH3B	Gamma_delta	-0.0722862	0.0891694	0.137336	3420
LUSC	IDH3B	InfiltrationScore	-0.255937	9.80645e-10	2.88273e-09	3420
LUSC	IDH3B	MAIT	-0.176204	3.0373e-05	8.8393e-05	3420
LUSC	IDH3B	Macrophage	-0.235986	1.89326e-08	5.87462e-08	3420
LUSC	IDH3B	Monocyte	0.0341205	0.42283	0.57864	3420
LUSC	IDH3B	NK	-0.206869	9.04522e-07	2.37808e-06	3420
LUSC	IDH3B	NKT	-0.15285	0.000305275	0.000627525	3420
LUSC	IDH3B	Neutrophil	0.0366459	0.389302	0.535857	3420
LUSC	IDH3B	Tfh	-0.172659	4.3991e-05	8.7694e-05	3420
LUSC	IDH3B	Th1	-0.0257596	0.545152	0.689888	3420
LUSC	IDH3B	Th17	-0.140809	0.00088948	0.00356911	3420
LUSC	IDH3B	Th2	0.141064	0.000870273	0.00372207	3420
LUSC	IDH3B	Tr1	0.0135098	0.751032	0.847355	3420
LUSC	IDH3B	iTreg	0.00736318	0.862715	0.911018	3420
LUSC	IDH3B	nTreg	0.128779	0.00239029	0.00481086	3420
MESO	IDH3B	Bcell	0.0782884	0.47105	0.835314	3420
MESO	IDH3B	CD4_T	-0.119024	0.272189	0.603958	3420
MESO	IDH3B	CD4_naive	-0.190146	0.0777252	0.307984	3420
MESO	IDH3B	CD8_T	0.20808	0.0531142	0.400926	3420
MESO	IDH3B	CD8_naive	0.0784709	0.470014	0.662654	3420
MESO	IDH3B	Central_memory	-0.172704	0.109683	0.324438	3420
MESO	IDH3B	Cytotoxic	-0.0127329	0.906819	0.952758	3420
MESO	IDH3B	DC	0.229922	0.0321658	0.231398	3420
MESO	IDH3B	Effector_memory	0.147165	0.173758	0.42201	3420
MESO	IDH3B	Exhausted	0.12851	0.235523	0.482271	3420
MESO	IDH3B	Gamma_delta	0.111639	0.303262	0.624686	3420
MESO	IDH3B	InfiltrationScore	0.126334	0.243613	0.453951	3420
MESO	IDH3B	MAIT	0.177997	0.0990592	0.387766	3420
MESO	IDH3B	Macrophage	0.147632	0.172381	0.384472	3420
MESO	IDH3B	Monocyte	-0.0730701	0.501205	0.861142	3420
MESO	IDH3B	NK	0.0513825	0.636467	0.817749	3420
MESO	IDH3B	NKT	-0.00293052	0.978509	0.993932	3420
MESO	IDH3B	Neutrophil	-0.134652	0.213698	0.565305	3420
MESO	IDH3B	Tfh	-0.158201	0.143334	0.463563	3420
MESO	IDH3B	Th1	0.108106	0.318916	0.58551	3420
MESO	IDH3B	Th17	-0.241161	0.0244372	0.0899536	3420
MESO	IDH3B	Th2	0.110931	0.30636	0.63064	3420
MESO	IDH3B	Tr1	0.0794812	0.464298	0.807786	3420
MESO	IDH3B	iTreg	-0.0387931	0.721287	0.848109	3420
MESO	IDH3B	nTreg	-0.103999	0.337755	0.594154	3420
OV	IDH3B	Bcell	0.111945	0.0492955	0.165609	3420
OV	IDH3B	CD4_T	-0.131162	0.0210969	0.0518388	3420
OV	IDH3B	CD4_naive	-0.0728104	0.201815	0.624827	3420
OV	IDH3B	CD8_T	0.04342	0.446944	0.640687	3420
OV	IDH3B	CD8_naive	0.184212	0.00114229	0.00365506	3420
OV	IDH3B	Central_memory	-0.141248	0.0129431	0.0395893	3420
OV	IDH3B	Cytotoxic	-0.0593262	0.29855	0.434362	3420
OV	IDH3B	DC	-0.0992219	0.0816149	0.204911	3420
OV	IDH3B	Effector_memory	0.0621961	0.275743	0.409079	3420
OV	IDH3B	Exhausted	-0.115234	0.0429537	0.091487	3420
OV	IDH3B	Gamma_delta	0.0727566	0.202149	0.378461	3420
OV	IDH3B	InfiltrationScore	-0.0646555	0.257164	0.401765	3420
OV	IDH3B	MAIT	-0.0363294	0.524623	0.692343	3420
OV	IDH3B	Macrophage	-0.070666	0.215453	0.320195	3420
OV	IDH3B	Monocyte	-0.100417	0.0779889	0.208161	3420
OV	IDH3B	NK	-0.041565	0.466613	0.635275	3420
OV	IDH3B	NKT	-0.0626733	0.272068	0.559683	3420
OV	IDH3B	Neutrophil	0.0994919	0.0807842	0.147016	3420
OV	IDH3B	Tfh	-0.161433	0.0044422	0.0140216	3420
OV	IDH3B	Th1	-0.0475403	0.404977	0.553778	3420
OV	IDH3B	Th17	0.0496244	0.384674	0.565449	3420
OV	IDH3B	Th2	-0.000523682	0.992685	0.996864	3420
OV	IDH3B	Tr1	-0.064284	0.259914	0.455957	3420
OV	IDH3B	iTreg	-0.116671	0.0404051	0.109359	3420
OV	IDH3B	nTreg	-0.153667	0.00680259	0.0547621	3420
PAAD	IDH3B	Bcell	0.0401588	0.589367	0.802863	3420
PAAD	IDH3B	CD4_T	-0.0883111	0.234523	0.319071	3420
PAAD	IDH3B	CD4_naive	0.131931	0.0750274	0.409026	3420
PAAD	IDH3B	CD8_T	0.115737	0.118718	0.230892	3420
PAAD	IDH3B	CD8_naive	0.106046	0.153073	0.379675	3420
PAAD	IDH3B	Central_memory	-0.235651	0.00132123	0.00469041	3420
PAAD	IDH3B	Cytotoxic	-0.0748401	0.313986	0.462979	3420
PAAD	IDH3B	DC	-0.147967	0.0456119	0.116997	3420
PAAD	IDH3B	Effector_memory	0.170817	0.0207805	0.0891546	3420
PAAD	IDH3B	Exhausted	0.178792	0.0154511	0.107078	3420
PAAD	IDH3B	Gamma_delta	-0.0224889	0.762517	0.831055	3420
PAAD	IDH3B	InfiltrationScore	-0.126191	0.0887195	0.179192	3420
PAAD	IDH3B	MAIT	-0.1188	0.109209	0.190207	3420
PAAD	IDH3B	Macrophage	-0.175047	0.0177834	0.0574816	3420
PAAD	IDH3B	Monocyte	-0.115161	0.120575	0.203703	3420
PAAD	IDH3B	NK	-0.0103355	0.889559	0.93049	3420
PAAD	IDH3B	NKT	-0.0836977	0.25997	0.498714	3420
PAAD	IDH3B	Neutrophil	0.0999284	0.17833	0.27811	3420
PAAD	IDH3B	Tfh	-0.148679	0.0445704	0.0885413	3420
PAAD	IDH3B	Th1	0.125434	0.0906642	0.421928	3420
PAAD	IDH3B	Th17	-0.0446921	0.548013	0.679884	3420
PAAD	IDH3B	Th2	0.150213	0.0423926	0.176484	3420
PAAD	IDH3B	Tr1	-0.235066	0.00135942	0.00490017	3420
PAAD	IDH3B	iTreg	-0.301401	3.3808e-05	0.000146339	3420
PAAD	IDH3B	nTreg	-0.113856	0.124869	0.228219	3420
PCPG	IDH3B	Bcell	-0.133366	0.0688113	0.169811	3420
PCPG	IDH3B	CD4_T	-0.358538	4.6897e-07	2.0936e-05	3420
PCPG	IDH3B	CD4_naive	0.088708	0.227312	0.579573	3420
PCPG	IDH3B	CD8_T	-0.0322758	0.66101	0.846536	3420
PCPG	IDH3B	CD8_naive	0.106622	0.146391	0.261101	3420
PCPG	IDH3B	Central_memory	-0.111265	0.129512	0.230468	3420
PCPG	IDH3B	Cytotoxic	0.0332042	0.651889	0.805224	3420
PCPG	IDH3B	DC	0.125478	0.0870532	0.236179	3420
PCPG	IDH3B	Effector_memory	-0.0481073	0.513224	0.698027	3420
PCPG	IDH3B	Exhausted	0.0535351	0.4668	0.676896	3420
PCPG	IDH3B	Gamma_delta	-0.0904404	0.218328	0.474554	3420
PCPG	IDH3B	InfiltrationScore	0.0701008	0.340408	0.509805	3420
PCPG	IDH3B	MAIT	0.109509	0.135708	0.239228	3420
PCPG	IDH3B	Macrophage	0.166545	0.0227185	0.0696028	3420
PCPG	IDH3B	Monocyte	0.147227	0.044349	0.148544	3420
PCPG	IDH3B	NK	0.0147374	0.841331	0.906855	3420
PCPG	IDH3B	NKT	0.0373301	0.61199	0.773673	3420
PCPG	IDH3B	Neutrophil	0.0924129	0.208411	0.39074	3420
PCPG	IDH3B	Tfh	-0.070329	0.338834	0.588341	3420
PCPG	IDH3B	Th1	0.0191874	0.794364	0.877206	3420
PCPG	IDH3B	Th17	0.209646	0.00398028	0.0298986	3420
PCPG	IDH3B	Th2	0.0766948	0.296813	0.489105	3420
PCPG	IDH3B	Tr1	0.025104	0.733071	0.876512	3420
PCPG	IDH3B	iTreg	-0.163082	0.0257405	0.0926966	3420
PCPG	IDH3B	nTreg	-0.310344	1.5416e-05	0.000165207	3420
PRAD	IDH3B	Bcell	0.028045	0.511601	0.724978	3420
PRAD	IDH3B	CD4_T	-0.0336042	0.431565	0.500125	3420
PRAD	IDH3B	CD4_naive	-0.151596	0.000360016	0.00103687	3420
PRAD	IDH3B	CD8_T	0.214167	3.97434e-07	2.6515e-06	3420
PRAD	IDH3B	CD8_naive	0.111313	0.00898303	0.0478411	3420
PRAD	IDH3B	Central_memory	-0.405635	3.37247e-23	3.18649e-22	3420
PRAD	IDH3B	Cytotoxic	0.00399315	0.925558	0.948544	3420
PRAD	IDH3B	DC	-0.159176	0.000177945	0.000594661	3420
PRAD	IDH3B	Effector_memory	0.134569	0.00156073	0.00523029	3420
PRAD	IDH3B	Exhausted	-0.00274562	0.948776	0.967012	3420
PRAD	IDH3B	Gamma_delta	0.155183	0.000258957	0.000848014	3420
PRAD	IDH3B	InfiltrationScore	-0.0104811	0.806262	0.867098	3420
PRAD	IDH3B	MAIT	0.102965	0.0157064	0.0414404	3420
PRAD	IDH3B	Macrophage	-0.108219	0.0110962	0.0295404	3420
PRAD	IDH3B	Monocyte	-0.0696367	0.102808	0.167715	3420
PRAD	IDH3B	NK	0.142716	0.000789133	0.00145564	3420
PRAD	IDH3B	NKT	0.196306	3.50907e-06	8.68262e-06	3420
PRAD	IDH3B	Neutrophil	-0.0374955	0.380131	0.458856	3420
PRAD	IDH3B	Tfh	-0.0399119	0.35017	0.450651	3420
PRAD	IDH3B	Th1	0.0396192	0.353718	0.532082	3420
PRAD	IDH3B	Th17	-0.0946131	0.0264999	0.0456406	3420
PRAD	IDH3B	Th2	0.169234	6.6449e-05	0.000308556	3420
PRAD	IDH3B	Tr1	-0.0841005	0.0486854	0.11784	3420
PRAD	IDH3B	iTreg	-0.340908	1.96101e-16	2.06121e-15	3420
PRAD	IDH3B	nTreg	-0.214246	3.93462e-07	1.56987e-06	3420
READ	IDH3B	Bcell	0.0354652	0.719466	0.831308	3420
READ	IDH3B	CD4_T	-0.04042	0.682253	0.777761	3420
READ	IDH3B	CD4_naive	0.135879	0.16694	0.744015	3420
READ	IDH3B	CD8_T	-0.0803612	0.415118	0.698247	3420
READ	IDH3B	CD8_naive	0.0374202	0.704698	0.850189	3420
READ	IDH3B	Central_memory	-0.0553965	0.574606	0.779766	3420
READ	IDH3B	Cytotoxic	-0.31877	0.000918973	0.0077257	3420
READ	IDH3B	DC	-0.230536	0.0179827	0.0983154	3420
READ	IDH3B	Effector_memory	0.0118615	0.904409	0.970069	3420
READ	IDH3B	Exhausted	-0.00118213	0.990451	0.995346	3420
READ	IDH3B	Gamma_delta	-0.225082	0.0209714	0.103672	3420
READ	IDH3B	InfiltrationScore	-0.16457	0.093423	0.201595	3420
READ	IDH3B	MAIT	0.0719829	0.46556	0.634005	3420
READ	IDH3B	Macrophage	-0.174454	0.0750934	0.197675	3420
READ	IDH3B	Monocyte	-0.139835	0.154815	0.325055	3420
READ	IDH3B	NK	0.0518424	0.599429	0.740769	3420
READ	IDH3B	NKT	0.103257	0.29454	0.521528	3420
READ	IDH3B	Neutrophil	0.170973	0.081187	0.182858	3420
READ	IDH3B	Tfh	-0.0857967	0.384171	0.56201	3420
READ	IDH3B	Th1	0.0230927	0.815118	0.916591	3420
READ	IDH3B	Th17	-0.0183257	0.852798	0.929881	3420
READ	IDH3B	Th2	-0.0652123	0.508656	0.634226	3420
READ	IDH3B	Tr1	-0.143593	0.143916	0.388946	3420
READ	IDH3B	iTreg	-0.114512	0.244756	0.448485	3420
READ	IDH3B	nTreg	0.04203	0.670318	0.772442	3420
SARC	IDH3B	Bcell	-0.0258544	0.675245	0.813738	3420
SARC	IDH3B	CD4_T	-0.0508311	0.409887	0.528513	3420
SARC	IDH3B	CD4_naive	-0.0550273	0.372275	0.488193	3420
SARC	IDH3B	CD8_T	0.091357	0.138006	0.297852	3420
SARC	IDH3B	CD8_naive	0.0944074	0.125275	0.217591	3420
SARC	IDH3B	Central_memory	-0.238219	8.9989e-05	0.000631429	3420
SARC	IDH3B	Cytotoxic	-0.0427769	0.488069	0.586869	3420
SARC	IDH3B	DC	-0.109033	0.076423	0.126734	3420
SARC	IDH3B	Effector_memory	0.104335	0.0900659	0.28834	3420
SARC	IDH3B	Exhausted	0.140078	0.0225609	0.0460924	3420
SARC	IDH3B	Gamma_delta	0.0668907	0.277935	0.513703	3420
SARC	IDH3B	InfiltrationScore	-0.0192853	0.754671	0.804104	3420
SARC	IDH3B	MAIT	0.0465006	0.450967	0.643948	3420
SARC	IDH3B	Macrophage	-0.0517967	0.401039	0.473354	3420
SARC	IDH3B	Monocyte	-0.0306731	0.619134	0.725489	3420
SARC	IDH3B	NK	0.114132	0.0635647	0.127874	3420
SARC	IDH3B	NKT	0.0084806	0.890711	0.936931	3420
SARC	IDH3B	Neutrophil	-0.0252749	0.682124	0.784115	3420
SARC	IDH3B	Tfh	-0.0352151	0.568184	0.694057	3420
SARC	IDH3B	Th1	-0.0248981	0.686611	0.794959	3420
SARC	IDH3B	Th17	-0.0680629	0.269581	0.458721	3420
SARC	IDH3B	Th2	0.100577	0.102325	0.34181	3420
SARC	IDH3B	Tr1	-0.0760923	0.216969	0.466819	3420
SARC	IDH3B	iTreg	-0.119379	0.0522443	0.109783	3420
SARC	IDH3B	nTreg	-0.0376039	0.542214	0.691194	3420
SKCM	IDH3B	Bcell	0.0295889	0.520461	0.700019	3420
SKCM	IDH3B	CD4_T	-0.171883	0.000169711	0.000529366	3420
SKCM	IDH3B	CD4_naive	-0.093645	0.0415606	0.106209	3420
SKCM	IDH3B	CD8_T	0.00178496	0.969083	0.979057	3420
SKCM	IDH3B	CD8_naive	-0.00872739	0.849693	0.900431	3420
SKCM	IDH3B	Central_memory	-0.220804	1.20639e-06	6.97185e-06	3420
SKCM	IDH3B	Cytotoxic	0.00445072	0.923009	0.949491	3420
SKCM	IDH3B	DC	0.0852065	0.0638034	0.124994	3420
SKCM	IDH3B	Effector_memory	-0.0174526	0.704691	0.801748	3420
SKCM	IDH3B	Exhausted	0.0223315	0.6277	0.738552	3420
SKCM	IDH3B	Gamma_delta	0.190346	3.0276e-05	0.000112785	3420
SKCM	IDH3B	InfiltrationScore	0.0684342	0.136822	0.208993	3420
SKCM	IDH3B	MAIT	-0.0648793	0.158458	0.268028	3420
SKCM	IDH3B	Macrophage	-0.0338223	0.462565	0.609254	3420
SKCM	IDH3B	Monocyte	0.0313356	0.496131	0.626015	3420
SKCM	IDH3B	NK	0.112165	0.0145552	0.0328178	3420
SKCM	IDH3B	NKT	0.086852	0.0588274	0.138183	3420
SKCM	IDH3B	Neutrophil	0.101913	0.0265057	0.0548287	3420
SKCM	IDH3B	Tfh	-0.0749893	0.102971	0.180361	3420
SKCM	IDH3B	Th1	-0.0447822	0.330608	0.501111	3420
SKCM	IDH3B	Th17	-0.131096	0.00425017	0.013313	3420
SKCM	IDH3B	Th2	-0.00659614	0.886108	0.938809	3420
SKCM	IDH3B	Tr1	-0.0716991	0.119024	0.312146	3420
SKCM	IDH3B	iTreg	-0.297002	4.15076e-11	2.7355e-10	3420
SKCM	IDH3B	nTreg	-0.123678	0.00701979	0.0180964	3420
STAD	IDH3B	Bcell	0.0252499	0.593185	0.69498	3420
STAD	IDH3B	CD4_T	-0.271021	5.12893e-09	1.52483e-08	3420
STAD	IDH3B	CD4_naive	-0.00154807	0.973875	0.984525	3420
STAD	IDH3B	CD8_T	0.087727	0.0629731	0.129256	3420
STAD	IDH3B	CD8_naive	0.0347554	0.462069	0.544879	3420
STAD	IDH3B	Central_memory	-0.0992638	0.0352872	0.0848459	3420
STAD	IDH3B	Cytotoxic	-0.0470186	0.319643	0.444853	3420
STAD	IDH3B	DC	0.0374428	0.428156	0.510535	3420
STAD	IDH3B	Effector_memory	0.0324604	0.492175	0.607464	3420
STAD	IDH3B	Exhausted	0.0263641	0.576975	0.673249	3420
STAD	IDH3B	Gamma_delta	0.0128696	0.785425	0.843472	3420
STAD	IDH3B	InfiltrationScore	-0.0869511	0.0653476	0.125346	3420
STAD	IDH3B	MAIT	-0.0289146	0.540675	0.648385	3420
STAD	IDH3B	Macrophage	-0.0888412	0.0596881	0.112858	3420
STAD	IDH3B	Monocyte	-0.0494086	0.295635	0.407875	3420
STAD	IDH3B	NK	-0.0541076	0.252026	0.352903	3420
STAD	IDH3B	NKT	0.0766404	0.104449	0.169245	3420
STAD	IDH3B	Neutrophil	0.176639	0.000165678	0.000462028	3420
STAD	IDH3B	Tfh	-0.080258	0.0890299	0.140962	3420
STAD	IDH3B	Th1	0.0577874	0.221152	0.304905	3420
STAD	IDH3B	Th17	-0.0373775	0.428963	0.570121	3420
STAD	IDH3B	Th2	-0.178135	0.000145442	0.000446494	3420
STAD	IDH3B	Tr1	-0.083044	0.0784469	0.141364	3420
STAD	IDH3B	iTreg	-0.163741	0.000487772	0.00186723	3420
STAD	IDH3B	nTreg	0.120022	0.0108281	0.0186617	3420
TGCT	IDH3B	Bcell	-0.372197	1.71512e-06	4.75209e-06	3420
TGCT	IDH3B	CD4_T	-0.427075	2.69904e-08	4.52573e-06	3420
TGCT	IDH3B	CD4_naive	0.014448	0.857927	0.954917	3420
TGCT	IDH3B	CD8_T	-0.275445	0.00050103	0.00138266	3420
TGCT	IDH3B	CD8_naive	0.323119	3.885e-05	0.000146693	3420
TGCT	IDH3B	Central_memory	-0.534744	6.45213e-13	4.50727e-12	3420
TGCT	IDH3B	Cytotoxic	-0.3982	2.63218e-07	8.47569e-07	3420
TGCT	IDH3B	DC	0.133162	0.0974777	0.236752	3420
TGCT	IDH3B	Effector_memory	-0.0764065	0.343115	0.490077	3420
TGCT	IDH3B	Exhausted	-0.164877	0.0397012	0.0820098	3420
TGCT	IDH3B	Gamma_delta	0.106489	0.185799	0.408929	3420
TGCT	IDH3B	InfiltrationScore	0.141323	0.0784474	0.15953	3420
TGCT	IDH3B	MAIT	0.0570712	0.479154	0.566163	3420
TGCT	IDH3B	Macrophage	0.330344	2.535e-05	0.000219766	3420
TGCT	IDH3B	Monocyte	0.399649	2.35987e-07	6.07166e-07	3420
TGCT	IDH3B	NK	-0.112191	0.163195	0.251315	3420
TGCT	IDH3B	NKT	0.167715	0.0363711	0.0537062	3420
TGCT	IDH3B	Neutrophil	0.236505	0.00295413	0.00856402	3420
TGCT	IDH3B	Tfh	-0.389051	5.18468e-07	2.01738e-06	3420
TGCT	IDH3B	Th1	-0.0849745	0.291561	0.362551	3420
TGCT	IDH3B	Th17	0.117812	0.142992	0.188415	3420
TGCT	IDH3B	Th2	0.33426	2.0022e-05	9.2259e-05	3420
TGCT	IDH3B	Tr1	-0.154072	0.0548117	0.220071	3420
TGCT	IDH3B	iTreg	0.0831946	0.301822	0.414715	3420
TGCT	IDH3B	nTreg	0.125302	0.119094	0.207194	3420
THCA	IDH3B	Bcell	0.257078	4.3716e-10	3.4718e-09	3420
THCA	IDH3B	CD4_T	-0.0805642	0.0541379	0.0882932	3420
THCA	IDH3B	CD4_naive	0.134891	0.00122131	0.00378839	3420
THCA	IDH3B	CD8_T	0.0655584	0.117305	0.178061	3420
THCA	IDH3B	CD8_naive	0.124308	0.00290062	0.00812878	3420
THCA	IDH3B	Central_memory	-0.320374	4.04892e-15	2.0541e-14	3420
THCA	IDH3B	Cytotoxic	-0.215247	2.0173e-07	5.68917e-07	3420
THCA	IDH3B	DC	-0.487462	1.78859e-35	2.16588e-34	3420
THCA	IDH3B	Effector_memory	-0.0713204	0.0883483	0.140261	3420
THCA	IDH3B	Exhausted	-0.0902649	0.0308884	0.0501105	3420
THCA	IDH3B	Gamma_delta	0.304518	9.72341e-14	1.45119e-12	3420
THCA	IDH3B	InfiltrationScore	-0.24597	2.49623e-09	6.78016e-09	3420
THCA	IDH3B	MAIT	0.288943	1.8381e-12	1.06249e-11	3420
THCA	IDH3B	Macrophage	-0.266053	1.00605e-10	3.67905e-10	3420
THCA	IDH3B	Monocyte	-0.352507	3.53316e-18	3.35382e-17	3420
THCA	IDH3B	NK	0.0793182	0.0579793	0.0892596	3420
THCA	IDH3B	NKT	-0.0789925	0.05902	0.10563	3420
THCA	IDH3B	Neutrophil	0.276052	1.83305e-11	7.35753e-11	3420
THCA	IDH3B	Tfh	-0.166263	6.4536e-05	0.00020184	3420
THCA	IDH3B	Th1	-0.156668	0.000168554	0.000494213	3420
THCA	IDH3B	Th17	0.0274868	0.511776	0.584966	3420
THCA	IDH3B	Th2	0.181142	1.307e-05	6.0046e-05	3420
THCA	IDH3B	Tr1	-0.280274	8.74439e-12	4.46675e-11	3420
THCA	IDH3B	iTreg	-0.434469	9.76531e-28	1.11384e-26	3420
THCA	IDH3B	nTreg	-0.426927	9.64948e-27	1.2405e-25	3420
THYM	IDH3B	Bcell	0.430876	7.26445e-07	3.57866e-06	3420
THYM	IDH3B	CD4_T	-0.0855811	0.348623	0.466019	3420
THYM	IDH3B	CD4_naive	-0.104438	0.252286	0.400272	3420
THYM	IDH3B	CD8_T	0.500546	4.33125e-09	1.70937e-08	3420
THYM	IDH3B	CD8_naive	0.112638	0.216734	0.301225	3420
THYM	IDH3B	Central_memory	-0.0613223	0.502229	0.610866	3420
THYM	IDH3B	Cytotoxic	0.23759	0.00841135	0.0245116	3420
THYM	IDH3B	DC	0.446	2.62713e-07	1.62171e-06	3420
THYM	IDH3B	Effector_memory	-0.244789	0.00657927	0.0148048	3420
THYM	IDH3B	Exhausted	0.389418	9.28072e-06	4.0861e-05	3420
THYM	IDH3B	Gamma_delta	0.236324	0.00877645	0.0232174	3420
THYM	IDH3B	InfiltrationScore	0.117148	0.198776	0.306147	3420
THYM	IDH3B	MAIT	0.0461994	0.613344	0.730991	3420
THYM	IDH3B	Macrophage	-0.15235	0.0938879	0.146127	3420
THYM	IDH3B	Monocyte	-0.268215	0.00281765	0.0061308	3420
THYM	IDH3B	NK	-0.13837	0.128528	0.208561	3420
THYM	IDH3B	NKT	-0.227543	0.0117162	0.0227073	3420
THYM	IDH3B	Neutrophil	-0.112995	0.215274	0.301092	3420
THYM	IDH3B	Tfh	0.325978	0.000248223	0.000615619	3420
THYM	IDH3B	Th1	0.113302	0.214022	0.398894	3420
THYM	IDH3B	Th17	-0.108761	0.233075	0.494899	3420
THYM	IDH3B	Th2	-0.100927	0.26867	0.39462	3420
THYM	IDH3B	Tr1	-0.094898	0.29846	0.453934	3420
THYM	IDH3B	iTreg	-0.379687	1.6086e-05	7.1377e-05	3420
THYM	IDH3B	nTreg	-0.370703	2.6322e-05	0.000124049	3420
UCEC	IDH3B	Bcell	0.227828	0.00114292	0.00838981	3420
UCEC	IDH3B	CD4_T	-0.373919	4.55668e-08	2.9161e-07	3420
UCEC	IDH3B	CD4_naive	0.0063695	0.928493	0.996393	3420
UCEC	IDH3B	CD8_T	-0.016823	0.812629	0.891403	3420
UCEC	IDH3B	CD8_naive	-0.012719	0.857776	0.910492	3420
UCEC	IDH3B	Central_memory	-0.444237	3.94906e-11	8.44576e-10	3420
UCEC	IDH3B	Cytotoxic	-0.0437641	0.537308	0.7116	3420
UCEC	IDH3B	DC	0.262047	0.000171363	0.00098438	3420
UCEC	IDH3B	Effector_memory	0.0835496	0.23832	0.388715	3420
UCEC	IDH3B	Exhausted	0.024852	0.726193	0.821015	3420
UCEC	IDH3B	Gamma_delta	0.116583	0.0993186	0.235747	3420
UCEC	IDH3B	InfiltrationScore	0.227991	0.00113334	0.00458142	3420
UCEC	IDH3B	MAIT	-0.0726196	0.305603	0.53065	3420
UCEC	IDH3B	Macrophage	0.277105	6.8222e-05	0.000392322	3420
UCEC	IDH3B	Monocyte	0.201098	0.00420203	0.0169966	3420
UCEC	IDH3B	NK	0.0450604	0.525311	0.642453	3420
UCEC	IDH3B	NKT	-0.0281317	0.69179	0.871736	3420
UCEC	IDH3B	Neutrophil	0.103702	0.142916	0.319189	3420
UCEC	IDH3B	Tfh	-0.259942	0.000194088	0.001213	3420
UCEC	IDH3B	Th1	-0.00232829	0.973831	0.986738	3420
UCEC	IDH3B	Th17	-0.200135	0.00439141	0.0233547	3420
UCEC	IDH3B	Th2	0.212767	0.00242552	0.0113285	3420
UCEC	IDH3B	Tr1	-0.0280548	0.69259	0.83507	3420
UCEC	IDH3B	iTreg	-0.153548	0.0295359	0.0863768	3420
UCEC	IDH3B	nTreg	-0.0702705	0.321554	0.479369	3420
UCS	IDH3B	Bcell	0.41304	0.00140717	0.146029	3420
UCS	IDH3B	CD4_T	-0.145107	0.28149	0.539978	3420
UCS	IDH3B	CD4_naive	-0.0243674	0.857215	0.928817	3420
UCS	IDH3B	CD8_T	0.228712	0.0870354	0.390389	3420
UCS	IDH3B	CD8_naive	0.219427	0.101007	0.393009	3420
UCS	IDH3B	Central_memory	-0.233629	0.0802778	0.495194	3420
UCS	IDH3B	Cytotoxic	-0.169917	0.206361	0.698954	3420
UCS	IDH3B	DC	-0.207986	0.120541	0.445507	3420
UCS	IDH3B	Effector_memory	-0.169756	0.206797	0.670598	3420
UCS	IDH3B	Exhausted	-0.0560047	0.679032	0.883823	3420
UCS	IDH3B	Gamma_delta	0.187662	0.162149	0.531761	3420
UCS	IDH3B	InfiltrationScore	-0.0615783	0.649081	0.901509	3420
UCS	IDH3B	MAIT	-0.133677	0.321521	0.932384	3420
UCS	IDH3B	Macrophage	-0.0771038	0.568627	0.870128	3420
UCS	IDH3B	Monocyte	0.0231118	0.864501	0.999158	3420
UCS	IDH3B	NK	-0.11575	0.391213	0.860076	3420
UCS	IDH3B	NKT	0.174272	0.194795	0.569132	3420
UCS	IDH3B	Neutrophil	0.158907	0.237738	0.781979	3420
UCS	IDH3B	Tfh	-0.0163023	0.904197	0.985488	3420
UCS	IDH3B	Th1	-0.146878	0.275598	0.84602	3420
UCS	IDH3B	Th17	-0.34652	0.00827673	0.158047	3420
UCS	IDH3B	Th2	0.00145853	0.991409	0.998436	3420
UCS	IDH3B	Tr1	0.0945729	0.484076	0.977078	3420
UCS	IDH3B	iTreg	-0.269966	0.0422626	0.339282	3420
UCS	IDH3B	nTreg	-0.24724	0.0637154	0.474954	3420
UVM	IDH3B	Bcell	0.179347	0.111426	0.21617	3420
UVM	IDH3B	CD4_T	-0.41071	0.000154272	0.00153762	3420
UVM	IDH3B	CD4_naive	-0.206525	0.0660607	0.188149	3420
UVM	IDH3B	CD8_T	0.0694594	0.540388	0.722976	3420
UVM	IDH3B	CD8_naive	0.150192	0.183592	0.532107	3420
UVM	IDH3B	Central_memory	-0.134712	0.233507	0.747937	3420
UVM	IDH3B	Cytotoxic	0.128949	0.254297	0.490063	3420
UVM	IDH3B	DC	0.154616	0.17087	0.320814	3420
UVM	IDH3B	Effector_memory	-0.238542	0.0330997	0.0657388	3420
UVM	IDH3B	Exhausted	-0.0354884	0.754645	0.863076	3420
UVM	IDH3B	Gamma_delta	0.352027	0.00136365	0.0100679	3420
UVM	IDH3B	InfiltrationScore	0.101104	0.3722	0.533206	3420
UVM	IDH3B	MAIT	0.00475906	0.966581	0.980524	3420
UVM	IDH3B	Macrophage	0.0672954	0.553109	0.719561	3420
UVM	IDH3B	Monocyte	0.109362	0.334211	0.705158	3420
UVM	IDH3B	NK	0.0553592	0.625742	0.776526	3420
UVM	IDH3B	NKT	0.00125537	0.991182	0.99513	3420
UVM	IDH3B	Neutrophil	0.0362434	0.749595	0.825324	3420
UVM	IDH3B	Tfh	-0.0620889	0.584291	0.763648	3420
UVM	IDH3B	Th1	-0.116303	0.304248	0.433587	3420
UVM	IDH3B	Th17	-0.301688	0.00653634	0.0307639	3420
UVM	IDH3B	Th2	0.0436141	0.700875	0.879535	3420
UVM	IDH3B	Tr1	0.29252	0.0084619	0.14225	3420
UVM	IDH3B	iTreg	-0.315285	0.00439053	0.0196089	3420
UVM	IDH3B	nTreg	-0.127711	0.258924	0.470001	3420

## Sheet: MAP3K4
cancertype	symbol	cell_type	cor	p_value	fdr	entrez
ACC	MAP3K4	Bcell	-0.174991	0.122954	0.284381	4216
ACC	MAP3K4	CD4_T	0.0953123	0.403405	0.762793	4216
ACC	MAP3K4	CD4_naive	-0.120287	0.291	0.533925	4216
ACC	MAP3K4	CD8_T	0.0443306	0.698068	0.819965	4216
ACC	MAP3K4	CD8_naive	-0.321704	0.00383937	0.0456737	4216
ACC	MAP3K4	Central_memory	-0.040772	0.72127	0.873455	4216
ACC	MAP3K4	Cytotoxic	0.135862	0.232531	0.402682	4216
ACC	MAP3K4	DC	0.256821	0.0223269	0.182978	4216
ACC	MAP3K4	Effector_memory	0.189106	0.095094	0.458538	4216
ACC	MAP3K4	Exhausted	0.126271	0.267482	0.533257	4216
ACC	MAP3K4	Gamma_delta	-0.0555025	0.627089	0.797298	4216
ACC	MAP3K4	InfiltrationScore	0.168531	0.137622	0.315452	4216
ACC	MAP3K4	MAIT	0.0402169	0.724913	0.848557	4216
ACC	MAP3K4	Macrophage	0.169359	0.135673	0.38193	4216
ACC	MAP3K4	Monocyte	-0.167684	0.13964	0.577495	4216
ACC	MAP3K4	NK	0.164331	0.147846	0.310218	4216
ACC	MAP3K4	NKT	0.259121	0.0211138	0.0972344	4216
ACC	MAP3K4	Neutrophil	-0.142073	0.211669	0.368435	4216
ACC	MAP3K4	Tfh	0.0480225	0.674286	0.816257	4216
ACC	MAP3K4	Th1	0.209774	0.0635251	0.173901	4216
ACC	MAP3K4	Th17	0.103908	0.362135	0.591008	4216
ACC	MAP3K4	Th2	0.13078	0.250632	0.437571	4216
ACC	MAP3K4	Tr1	-0.0109682	0.923571	0.992607	4216
ACC	MAP3K4	iTreg	0.402885	0.000232182	0.00396273	4216
ACC	MAP3K4	nTreg	0.330433	0.00293789	0.0455003	4216
BLCA	MAP3K4	Bcell	-0.196141	4.4866e-05	0.000424928	4216
BLCA	MAP3K4	CD4_T	0.0381471	0.431723	0.520454	4216
BLCA	MAP3K4	CD4_naive	-0.0167338	0.730247	0.807269	4216
BLCA	MAP3K4	CD8_T	-0.0980613	0.0428386	0.139198	4216
BLCA	MAP3K4	CD8_naive	-0.0785901	0.10486	0.165367	4216
BLCA	MAP3K4	Central_memory	-0.00286846	0.952872	0.969511	4216
BLCA	MAP3K4	Cytotoxic	0.047329	0.32922	0.411592	4216
BLCA	MAP3K4	DC	-0.0573082	0.237319	0.320491	4216
BLCA	MAP3K4	Effector_memory	0.00067369	0.988925	0.994	4216
BLCA	MAP3K4	Exhausted	-0.0451675	0.351813	0.435424	4216
BLCA	MAP3K4	Gamma_delta	-0.127141	0.0085328	0.0222701	4216
BLCA	MAP3K4	InfiltrationScore	-0.135351	0.00508523	0.00958371	4216
BLCA	MAP3K4	MAIT	0.113901	0.0185518	0.143646	4216
BLCA	MAP3K4	Macrophage	-0.0724699	0.13489	0.184669	4216
BLCA	MAP3K4	Monocyte	-0.0264049	0.586355	0.713799	4216
BLCA	MAP3K4	NK	-0.0541609	0.264115	0.349424	4216
BLCA	MAP3K4	NKT	0.0904753	0.0617715	0.103159	4216
BLCA	MAP3K4	Neutrophil	0.068401	0.158261	0.234793	4216
BLCA	MAP3K4	Tfh	-0.03968	0.413434	0.558608	4216
BLCA	MAP3K4	Th1	0.0119129	0.806104	0.853969	4216
BLCA	MAP3K4	Th17	0.0721447	0.136654	0.222325	4216
BLCA	MAP3K4	Th2	-0.0162113	0.738357	0.810069	4216
BLCA	MAP3K4	Tr1	-0.0615743	0.20414	0.350494	4216
BLCA	MAP3K4	iTreg	0.104029	0.0316198	0.0570396	4216
BLCA	MAP3K4	nTreg	0.0601413	0.214887	0.352886	4216
BRCA	MAP3K4	Bcell	-0.0444007	0.121442	0.16078	4216
BRCA	MAP3K4	CD4_T	0.18474	8.20646e-11	2.38845e-10	4216
BRCA	MAP3K4	CD4_naive	-0.0326941	0.254223	0.71159	4216
BRCA	MAP3K4	CD8_T	-0.0798382	0.00530459	0.00984615	4216
BRCA	MAP3K4	CD8_naive	-0.033124	0.248027	0.309277	4216
BRCA	MAP3K4	Central_memory	0.159414	2.22369e-08	7.67569e-08	4216
BRCA	MAP3K4	Cytotoxic	0.0027413	0.92386	0.938556	4216
BRCA	MAP3K4	DC	-0.0854776	0.00283061	0.0047441	4216
BRCA	MAP3K4	Effector_memory	-0.196284	4.82696e-12	2.98597e-11	4216
BRCA	MAP3K4	Exhausted	-0.114709	6.0086e-05	0.000128851	4216
BRCA	MAP3K4	Gamma_delta	-0.0472808	0.0990815	0.13656	4216
BRCA	MAP3K4	InfiltrationScore	-0.0983257	0.000589592	0.00110601	4216
BRCA	MAP3K4	MAIT	0.0568269	0.0473881	0.0847609	4216
BRCA	MAP3K4	Macrophage	-0.17622	5.93115e-10	2.51777e-09	4216
BRCA	MAP3K4	Monocyte	-0.0714001	0.0126855	0.0240876	4216
BRCA	MAP3K4	NK	0.0927954	0.00118603	0.00194357	4216
BRCA	MAP3K4	NKT	0.1438	4.6632e-07	1.17896e-06	4216
BRCA	MAP3K4	Neutrophil	-0.0562766	0.0495784	0.0763273	4216
BRCA	MAP3K4	Tfh	0.109002	0.000138073	0.000282335	4216
BRCA	MAP3K4	Th1	-0.0535631	0.0616554	0.0891356	4216
BRCA	MAP3K4	Th17	0.100634	0.000435755	0.000794749	4216
BRCA	MAP3K4	Th2	0.121857	2.005e-05	8.5909e-05	4216
BRCA	MAP3K4	Tr1	-0.0440064	0.124788	0.176923	4216
BRCA	MAP3K4	iTreg	0.0493781	0.0849663	0.114507	4216
BRCA	MAP3K4	nTreg	0.0412605	0.150117	0.201461	4216
CESC	MAP3K4	Bcell	-0.0534195	0.348544	0.533107	4216
CESC	MAP3K4	CD4_T	0.0148277	0.794842	0.853914	4216
CESC	MAP3K4	CD4_naive	0.126182	0.0263124	0.147386	4216
CESC	MAP3K4	CD8_T	-0.233371	3.3281e-05	0.00026515	4216
CESC	MAP3K4	CD8_naive	0.226587	5.6772e-05	0.000289907	4216
CESC	MAP3K4	Central_memory	0.0579346	0.30926	0.43966	4216
CESC	MAP3K4	Cytotoxic	-0.225668	6.0954e-05	0.000398594	4216
CESC	MAP3K4	DC	-0.126692	0.0257056	0.0545801	4216
CESC	MAP3K4	Effector_memory	0.0205309	0.718801	0.865839	4216
CESC	MAP3K4	Exhausted	-0.321601	6.86733e-09	1.6156e-07	4216
CESC	MAP3K4	Gamma_delta	-0.158992	0.00501759	0.0228662	4216
CESC	MAP3K4	InfiltrationScore	-0.262573	2.77377e-06	2.0339e-05	4216
CESC	MAP3K4	MAIT	0.19358	0.000610202	0.00857498	4216
CESC	MAP3K4	Macrophage	-0.178325	0.00161955	0.0061924	4216
CESC	MAP3K4	Monocyte	0.0566424	0.320192	0.561165	4216
CESC	MAP3K4	NK	-0.197644	0.000464525	0.00282001	4216
CESC	MAP3K4	NKT	0.0449535	0.430294	0.628347	4216
CESC	MAP3K4	Neutrophil	0.155605	0.00604406	0.0236337	4216
CESC	MAP3K4	Tfh	-0.112394	0.0480214	0.12467	4216
CESC	MAP3K4	Th1	-0.22879	4.7817e-05	0.000483931	4216
CESC	MAP3K4	Th17	0.168239	0.00296453	0.0125491	4216
CESC	MAP3K4	Th2	-0.0600554	0.291853	0.48393	4216
CESC	MAP3K4	Tr1	-0.0309746	0.58693	0.746713	4216
CESC	MAP3K4	iTreg	-0.03641	0.523027	0.64264	4216
CESC	MAP3K4	nTreg	-0.00933484	0.86997	0.922369	4216
CHOL	MAP3K4	Bcell	0.0988403	0.5183	0.642319	4216
CHOL	MAP3K4	CD4_T	0.00593159	0.969153	0.986462	4216
CHOL	MAP3K4	CD4_naive	-0.131121	0.390588	0.79493	4216
CHOL	MAP3K4	CD8_T	0.311985	0.0369462	0.411037	4216
CHOL	MAP3K4	CD8_naive	-0.123788	0.417855	0.546729	4216
CHOL	MAP3K4	Central_memory	0.132703	0.384846	0.797704	4216
CHOL	MAP3K4	Cytotoxic	0.114252	0.454877	0.833081	4216
CHOL	MAP3K4	DC	-0.118449	0.438366	0.700696	4216
CHOL	MAP3K4	Effector_memory	-0.362528	0.0143903	0.0874698	4216
CHOL	MAP3K4	Exhausted	0.359967	0.0151483	0.641947	4216
CHOL	MAP3K4	Gamma_delta	0.0751866	0.623518	0.863048	4216
CHOL	MAP3K4	InfiltrationScore	-0.142241	0.351295	0.525088	4216
CHOL	MAP3K4	MAIT	-0.130363	0.393357	0.579491	4216
CHOL	MAP3K4	Macrophage	-0.155615	0.30737	0.448956	4216
CHOL	MAP3K4	Monocyte	-0.216987	0.152213	0.269402	4216
CHOL	MAP3K4	NK	0.0136386	0.929145	0.960412	4216
CHOL	MAP3K4	NKT	0.217089	0.152018	0.537912	4216
CHOL	MAP3K4	Neutrophil	-0.259127	0.0856397	0.451567	4216
CHOL	MAP3K4	Tfh	0.15481	0.309909	0.508173	4216
CHOL	MAP3K4	Th1	0.0553396	0.718055	0.8648	4216
CHOL	MAP3K4	Th17	-0.212735	0.160607	0.269281	4216
CHOL	MAP3K4	Th2	-0.316497	0.0341607	0.726347	4216
CHOL	MAP3K4	Tr1	0.112606	0.461444	0.634307	4216
CHOL	MAP3K4	iTreg	0.215034	0.156028	0.544995	4216
CHOL	MAP3K4	nTreg	0.0752529	0.623212	0.728566	4216
COAD	MAP3K4	Bcell	0.0184774	0.738453	0.797428	4216
COAD	MAP3K4	CD4_T	0.121365	0.0277274	0.0437596	4216
COAD	MAP3K4	CD4_naive	-0.0303844	0.582901	0.901948	4216
COAD	MAP3K4	CD8_T	-0.115722	0.035899	0.0758219	4216
COAD	MAP3K4	CD8_naive	0.128161	0.020052	0.0414239	4216
COAD	MAP3K4	Central_memory	0.0544314	0.324984	0.506439	4216
COAD	MAP3K4	Cytotoxic	-0.010605	0.848032	0.886301	4216
COAD	MAP3K4	DC	0.0428116	0.438972	0.569502	4216
COAD	MAP3K4	Effector_memory	-0.235845	1.5413e-05	0.0001339	4216
COAD	MAP3K4	Exhausted	-0.0234235	0.672073	0.757151	4216
COAD	MAP3K4	Gamma_delta	0.108977	0.0482656	0.102802	4216
COAD	MAP3K4	InfiltrationScore	0.00710052	0.897909	0.919747	4216
COAD	MAP3K4	MAIT	-0.136687	0.0130831	0.0231357	4216
COAD	MAP3K4	Macrophage	0.0285982	0.605257	0.704635	4216
COAD	MAP3K4	Monocyte	0.183457	0.000827692	0.00221654	4216
COAD	MAP3K4	NK	-0.0840524	0.128143	0.17278	4216
COAD	MAP3K4	NKT	0.0279444	0.613534	0.695609	4216
COAD	MAP3K4	Neutrophil	-0.0644368	0.2438	0.336949	4216
COAD	MAP3K4	Tfh	-0.0455221	0.410519	0.495054	4216
COAD	MAP3K4	Th1	-0.030743	0.578459	0.703012	4216
COAD	MAP3K4	Th17	-0.0771418	0.16272	0.254324	4216
COAD	MAP3K4	Th2	-0.0368562	0.505288	0.573927	4216
COAD	MAP3K4	Tr1	0.0566672	0.305476	0.419452	4216
COAD	MAP3K4	iTreg	0.140612	0.0106659	0.0258875	4216
COAD	MAP3K4	nTreg	-0.0513715	0.352961	0.427247	4216
DLBC	MAP3K4	Bcell	-0.240968	0.0989667	0.252241	4216
DLBC	MAP3K4	CD4_T	0.310824	0.0315344	0.112345	4216
DLBC	MAP3K4	CD4_naive	0.214305	0.143559	0.523493	4216
DLBC	MAP3K4	CD8_T	-0.172029	0.242333	0.458625	4216
DLBC	MAP3K4	CD8_naive	0.108158	0.464328	0.801699	4216
DLBC	MAP3K4	Central_memory	0.429328	0.00232649	0.00757494	4216
DLBC	MAP3K4	Cytotoxic	0.0366775	0.804526	0.948132	4216
DLBC	MAP3K4	DC	-0.476061	0.000625975	0.0306425	4216
DLBC	MAP3K4	Effector_memory	-0.29464	0.0420637	0.191453	4216
DLBC	MAP3K4	Exhausted	-0.0418977	0.77737	0.913326	4216
DLBC	MAP3K4	Gamma_delta	-0.0204686	0.890172	0.949311	4216
DLBC	MAP3K4	InfiltrationScore	-0.44869	0.00138095	0.0133109	4216
DLBC	MAP3K4	MAIT	-0.179859	0.221233	0.541212	4216
DLBC	MAP3K4	Macrophage	-0.0482562	0.744647	0.91866	4216
DLBC	MAP3K4	Monocyte	-0.0689	0.6417	0.898412	4216
DLBC	MAP3K4	NK	-0.339142	0.0183704	0.0744355	4216
DLBC	MAP3K4	NKT	-0.0709471	0.631808	0.937339	4216
DLBC	MAP3K4	Neutrophil	0.134473	0.362164	0.731433	4216
DLBC	MAP3K4	Tfh	0.0424585	0.774468	0.957395	4216
DLBC	MAP3K4	Th1	-0.173549	0.238132	0.445149	4216
DLBC	MAP3K4	Th17	0.296588	0.0406613	0.111017	4216
DLBC	MAP3K4	Th2	-0.275959	0.0576231	0.186041	4216
DLBC	MAP3K4	Tr1	0.328155	0.022783	0.137386	4216
DLBC	MAP3K4	iTreg	0.483787	0.000494652	0.00236854	4216
DLBC	MAP3K4	nTreg	0.0903489	0.541394	0.795228	4216
ESCA	MAP3K4	Bcell	-0.155558	0.0294697	0.0753751	4216
ESCA	MAP3K4	CD4_T	-0.0753262	0.294034	0.379862	4216
ESCA	MAP3K4	CD4_naive	-0.0930273	0.194678	0.848993	4216
ESCA	MAP3K4	CD8_T	0.0427723	0.551673	0.772189	4216
ESCA	MAP3K4	CD8_naive	0.0520743	0.468532	0.682666	4216
ESCA	MAP3K4	Central_memory	-0.0470986	0.512129	0.644384	4216
ESCA	MAP3K4	Cytotoxic	0.117081	0.1022	0.312038	4216
ESCA	MAP3K4	DC	0.203327	0.00425935	0.0118203	4216
ESCA	MAP3K4	Effector_memory	0.0678828	0.344469	0.662558	4216
ESCA	MAP3K4	Exhausted	-0.0247752	0.730329	0.868963	4216
ESCA	MAP3K4	Gamma_delta	0.0454956	0.526608	0.676506	4216
ESCA	MAP3K4	InfiltrationScore	0.0921314	0.199029	0.382698	4216
ESCA	MAP3K4	MAIT	-0.037143	0.605258	0.723508	4216
ESCA	MAP3K4	Macrophage	0.0716527	0.318277	0.483206	4216
ESCA	MAP3K4	Monocyte	0.0341334	0.634823	0.800163	4216
ESCA	MAP3K4	NK	0.0581516	0.41817	0.595385	4216
ESCA	MAP3K4	NKT	-0.191564	0.00715181	0.0734583	4216
ESCA	MAP3K4	Neutrophil	-0.15819	0.0267972	0.0697982	4216
ESCA	MAP3K4	Tfh	-0.0351528	0.62474	0.71914	4216
ESCA	MAP3K4	Th1	0.0740766	0.302139	0.576648	4216
ESCA	MAP3K4	Th17	-0.0801565	0.264075	0.409626	4216
ESCA	MAP3K4	Th2	0.199692	0.00501413	0.0193919	4216
ESCA	MAP3K4	Tr1	-0.103457	0.149018	0.283056	4216
ESCA	MAP3K4	iTreg	0.224874	0.00153077	0.0135767	4216
ESCA	MAP3K4	nTreg	-0.104	0.146883	0.235495	4216
GBM	MAP3K4	Bcell	0.157104	0.0384259	0.0907031	4216
GBM	MAP3K4	CD4_T	0.112284	0.140181	0.227172	4216
GBM	MAP3K4	CD4_naive	0.126373	0.0965867	0.172564	4216
GBM	MAP3K4	CD8_T	-0.214685	0.00444503	0.0238547	4216
GBM	MAP3K4	CD8_naive	0.106427	0.162197	0.286338	4216
GBM	MAP3K4	Central_memory	-0.0533765	0.484235	0.672406	4216
GBM	MAP3K4	Cytotoxic	-0.031277	0.682027	0.805047	4216
GBM	MAP3K4	DC	-0.122027	0.108705	0.211872	4216
GBM	MAP3K4	Effector_memory	-0.254953	0.000686017	0.00349939	4216
GBM	MAP3K4	Exhausted	-0.208098	0.00586108	0.0234561	4216
GBM	MAP3K4	Gamma_delta	0.0980627	0.197984	0.375947	4216
GBM	MAP3K4	InfiltrationScore	-0.130014	0.0872826	0.171875	4216
GBM	MAP3K4	MAIT	-0.263717	0.000438031	0.00281648	4216
GBM	MAP3K4	Macrophage	-0.258444	0.000574808	0.00180766	4216
GBM	MAP3K4	Monocyte	0.0417729	0.58418	0.723715	4216
GBM	MAP3K4	NK	-0.00673173	0.929751	0.957423	4216
GBM	MAP3K4	NKT	-0.117409	0.122854	0.376357	4216
GBM	MAP3K4	Neutrophil	0.148577	0.0503932	0.110349	4216
GBM	MAP3K4	Tfh	-0.141278	0.062957	0.196805	4216
GBM	MAP3K4	Th1	-0.0936085	0.219229	0.462558	4216
GBM	MAP3K4	Th17	0.110343	0.147208	0.299689	4216
GBM	MAP3K4	Th2	-0.338459	4.92539e-06	3.8677e-05	4216
GBM	MAP3K4	Tr1	0.102354	0.178969	0.460014	4216
GBM	MAP3K4	iTreg	0.0464609	0.542675	0.75912	4216
GBM	MAP3K4	nTreg	-0.112155	0.140638	0.30591	4216
HNSC	MAP3K4	Bcell	-0.130156	0.00191657	0.00501062	4216
HNSC	MAP3K4	CD4_T	0.108323	0.00990955	0.0160311	4216
HNSC	MAP3K4	CD4_naive	0.0547751	0.193177	0.463256	4216
HNSC	MAP3K4	CD8_T	-0.12539	0.00280496	0.00872887	4216
HNSC	MAP3K4	CD8_naive	0.147121	0.000445567	0.00175259	4216
HNSC	MAP3K4	Central_memory	0.0452661	0.282336	0.352317	4216
HNSC	MAP3K4	Cytotoxic	-0.121308	0.00384859	0.0106422	4216
HNSC	MAP3K4	DC	0.000286076	0.994582	0.99567	4216
HNSC	MAP3K4	Effector_memory	-0.00247213	0.953204	0.965139	4216
HNSC	MAP3K4	Exhausted	-0.155613	0.000201901	0.000701029	4216
HNSC	MAP3K4	Gamma_delta	-0.204537	9.23418e-07	3.25053e-06	4216
HNSC	MAP3K4	InfiltrationScore	-0.131058	0.00178064	0.00537502	4216
HNSC	MAP3K4	MAIT	0.0717103	0.0882943	0.146283	4216
HNSC	MAP3K4	Macrophage	-0.0794525	0.058886	0.108999	4216
HNSC	MAP3K4	Monocyte	0.0768825	0.0675864	0.133305	4216
HNSC	MAP3K4	NK	-0.188344	6.44049e-06	3.4168e-05	4216
HNSC	MAP3K4	NKT	0.118693	0.0046904	0.0115315	4216
HNSC	MAP3K4	Neutrophil	0.00638075	0.879606	0.907375	4216
HNSC	MAP3K4	Tfh	-0.0841006	0.0455069	0.0722198	4216
HNSC	MAP3K4	Th1	-0.10714	0.0107524	0.0230336	4216
HNSC	MAP3K4	Th17	0.0508423	0.227169	0.329784	4216
HNSC	MAP3K4	Th2	-0.0797259	0.0580176	0.111888	4216
HNSC	MAP3K4	Tr1	0.0356002	0.397915	0.486233	4216
HNSC	MAP3K4	iTreg	0.176356	2.4485e-05	6.4507e-05	4216
HNSC	MAP3K4	nTreg	0.141646	0.000726269	0.00241586	4216
KICH	MAP3K4	Bcell	-0.233481	0.0259235	0.0472259	4216
KICH	MAP3K4	CD4_T	0.032978	0.756313	0.92729	4216
KICH	MAP3K4	CD4_naive	-0.237014	0.0236941	0.0930975	4216
KICH	MAP3K4	CD8_T	0.170833	0.105438	0.324646	4216
KICH	MAP3K4	CD8_naive	-0.203542	0.0529735	0.106415	4216
KICH	MAP3K4	Central_memory	-0.129506	0.221146	0.329389	4216
KICH	MAP3K4	Cytotoxic	-0.071066	0.503239	0.645183	4216
KICH	MAP3K4	DC	-0.256796	0.0140038	0.0322331	4216
KICH	MAP3K4	Effector_memory	0.0053769	0.959657	0.982539	4216
KICH	MAP3K4	Exhausted	0.217734	0.0381461	0.0700595	4216
KICH	MAP3K4	Gamma_delta	0.105163	0.321162	0.436605	4216
KICH	MAP3K4	InfiltrationScore	-0.0738139	0.486833	0.674566	4216
KICH	MAP3K4	MAIT	-0.176245	0.0946936	0.28679	4216
KICH	MAP3K4	Macrophage	-0.126141	0.23348	0.374958	4216
KICH	MAP3K4	Monocyte	0.0526517	0.62013	0.93803	4216
KICH	MAP3K4	NK	0.0432655	0.683852	0.798528	4216
KICH	MAP3K4	NKT	0.193648	0.0658855	0.100486	4216
KICH	MAP3K4	Neutrophil	0.185453	0.0784163	0.218904	4216
KICH	MAP3K4	Tfh	0.152865	0.14801	0.263004	4216
KICH	MAP3K4	Th1	0.0106797	0.919969	0.981058	4216
KICH	MAP3K4	Th17	0.247622	0.0179578	0.0340135	4216
KICH	MAP3K4	Th2	0.194804	0.0642568	0.109984	4216
KICH	MAP3K4	Tr1	0.135524	0.200242	0.488634	4216
KICH	MAP3K4	iTreg	0.165276	0.117436	0.339711	4216
KICH	MAP3K4	nTreg	-0.0733634	0.489503	0.63988	4216
KIRC	MAP3K4	Bcell	0.0669345	0.0997276	0.281593	4216
KIRC	MAP3K4	CD4_T	0.157296	0.000100907	0.000249116	4216
KIRC	MAP3K4	CD4_naive	0.238352	2.82878e-09	7.06677e-09	4216
KIRC	MAP3K4	CD8_T	-0.3354	2.12858e-17	1.01354e-16	4216
KIRC	MAP3K4	CD8_naive	0.117654	0.00372699	0.00778007	4216
KIRC	MAP3K4	Central_memory	-0.0296678	0.466009	0.547543	4216
KIRC	MAP3K4	Cytotoxic	-0.142681	0.000426391	0.000730185	4216
KIRC	MAP3K4	DC	-0.181289	7.09424e-06	2.1959e-05	4216
KIRC	MAP3K4	Effector_memory	-0.0804185	0.0478401	0.116223	4216
KIRC	MAP3K4	Exhausted	-0.287438	5.43072e-13	3.14145e-12	4216
KIRC	MAP3K4	Gamma_delta	-0.0920683	0.0234155	0.0367876	4216
KIRC	MAP3K4	InfiltrationScore	-0.230077	1.00936e-08	3.16415e-08	4216
KIRC	MAP3K4	MAIT	-0.185496	4.28821e-06	2.3872e-05	4216
KIRC	MAP3K4	Macrophage	-0.248044	5.99662e-10	2.50072e-09	4216
KIRC	MAP3K4	Monocyte	-0.0286021	0.482187	0.571492	4216
KIRC	MAP3K4	NK	-0.178052	1.0369e-05	2.2141e-05	4216
KIRC	MAP3K4	NKT	0.114196	0.00488401	0.011848	4216
KIRC	MAP3K4	Neutrophil	0.227747	1.43169e-08	3.6349e-08	4216
KIRC	MAP3K4	Tfh	-0.206412	2.95843e-07	6.97736e-07	4216
KIRC	MAP3K4	Th1	-0.236233	3.93575e-09	1.3606e-08	4216
KIRC	MAP3K4	Th17	0.147198	0.000276975	0.000518889	4216
KIRC	MAP3K4	Th2	0.027134	0.504962	0.58467	4216
KIRC	MAP3K4	Tr1	0.023333	0.566454	0.656549	4216
KIRC	MAP3K4	iTreg	0.0123224	0.762098	0.800339	4216
KIRC	MAP3K4	nTreg	-0.0805059	0.0475975	0.0737201	4216
KIRP	MAP3K4	Bcell	0.217733	7.9662e-05	0.00345455	4216
KIRP	MAP3K4	CD4_T	0.312466	9.56666e-09	6.79686e-08	4216
KIRP	MAP3K4	CD4_naive	0.340395	3.33108e-10	4.70003e-09	4216
KIRP	MAP3K4	CD8_T	-0.158631	0.00426294	0.0107245	4216
KIRP	MAP3K4	CD8_naive	0.201895	0.000260097	0.00118633	4216
KIRP	MAP3K4	Central_memory	0.109487	0.0492979	0.0842385	4216
KIRP	MAP3K4	Cytotoxic	-0.186514	0.000755302	0.0024436	4216
KIRP	MAP3K4	DC	-0.375292	3.05264e-12	5.04867e-11	4216
KIRP	MAP3K4	Effector_memory	-0.0727677	0.192078	0.292873	4216
KIRP	MAP3K4	Exhausted	-0.261907	1.82075e-06	1.0286e-05	4216
KIRP	MAP3K4	Gamma_delta	-0.0783294	0.160184	0.24207	4216
KIRP	MAP3K4	InfiltrationScore	-0.29157	9.48998e-08	5.06082e-07	4216
KIRP	MAP3K4	MAIT	-0.271242	7.45923e-07	1.0011e-05	4216
KIRP	MAP3K4	Macrophage	-0.424257	1.52193e-15	4.35912e-14	4216
KIRP	MAP3K4	Monocyte	-0.212116	0.000122429	0.000416985	4216
KIRP	MAP3K4	NK	-0.0459963	0.410004	0.520259	4216
KIRP	MAP3K4	NKT	0.106181	0.0566122	0.127916	4216
KIRP	MAP3K4	Neutrophil	0.18839	0.000666084	0.00209651	4216
KIRP	MAP3K4	Tfh	-0.0334685	0.548947	0.667096	4216
KIRP	MAP3K4	Th1	-0.185897	0.000786979	0.0036534	4216
KIRP	MAP3K4	Th17	0.307105	1.75369e-08	1.05012e-07	4216
KIRP	MAP3K4	Th2	-0.0981896	0.0780521	0.219351	4216
KIRP	MAP3K4	Tr1	-0.0648242	0.245342	0.456702	4216
KIRP	MAP3K4	iTreg	0.1448	0.00915954	0.0316587	4216
KIRP	MAP3K4	nTreg	0.0302861	0.587596	0.723675	4216
LAML	MAP3K4	Bcell	0.194553	0.010319	0.0368998	4216
LAML	MAP3K4	CD4_T	0.329919	9.3059e-06	9.3422e-05	4216
LAML	MAP3K4	CD4_naive	-0.020429	0.789637	0.981037	4216
LAML	MAP3K4	CD8_T	0.211493	0.00521804	0.016603	4216
LAML	MAP3K4	CD8_naive	0.190713	0.0119588	0.0890813	4216
LAML	MAP3K4	Central_memory	0.615593	2.01158e-19	1.73232e-16	4216
LAML	MAP3K4	Cytotoxic	-0.141872	0.0626117	0.155759	4216
LAML	MAP3K4	DC	-0.179641	0.0180324	0.0568558	4216
LAML	MAP3K4	Effector_memory	0.17895	0.0184879	0.0859175	4216
LAML	MAP3K4	Exhausted	-0.173057	0.0227912	0.0734262	4216
LAML	MAP3K4	Gamma_delta	0.0804728	0.292575	0.469424	4216
LAML	MAP3K4	InfiltrationScore	-0.436204	1.98571e-09	2.10213e-08	4216
LAML	MAP3K4	MAIT	0.159458	0.0361208	0.142381	4216
LAML	MAP3K4	Macrophage	-0.470023	6.82988e-11	7.01656e-10	4216
LAML	MAP3K4	Monocyte	-0.454048	3.51311e-10	3.5304e-09	4216
LAML	MAP3K4	NK	0.144892	0.0571728	0.129627	4216
LAML	MAP3K4	NKT	-0.490699	7.20377e-12	1.03395e-09	4216
LAML	MAP3K4	Neutrophil	-0.333383	7.39208e-06	7.3649e-05	4216
LAML	MAP3K4	Tfh	0.0734407	0.336926	0.546178	4216
LAML	MAP3K4	Th1	0.213929	0.00471045	0.049157	4216
LAML	MAP3K4	Th17	0.111266	0.145007	0.3454	4216
LAML	MAP3K4	Th2	0.205736	0.00661704	0.0418318	4216
LAML	MAP3K4	Tr1	0.147753	0.0523851	0.124312	4216
LAML	MAP3K4	iTreg	0.250583	0.000883485	0.00714252	4216
LAML	MAP3K4	nTreg	0.306715	4.055e-05	0.000899407	4216
LGG	MAP3K4	Bcell	0.157652	0.000254729	0.000656072	4216
LGG	MAP3K4	CD4_T	-0.162388	0.000164042	0.000418585	4216
LGG	MAP3K4	CD4_naive	0.0431768	0.31931	0.511214	4216
LGG	MAP3K4	CD8_T	-0.0364466	0.400612	0.499509	4216
LGG	MAP3K4	CD8_naive	-0.0457227	0.291582	0.385465	4216
LGG	MAP3K4	Central_memory	-0.175396	4.5964e-05	0.000110693	4216
LGG	MAP3K4	Cytotoxic	0.0289268	0.504755	0.583787	4216
LGG	MAP3K4	DC	-0.0259106	0.550207	0.622944	4216
LGG	MAP3K4	Effector_memory	0.0168924	0.696928	0.761625	4216
LGG	MAP3K4	Exhausted	-0.059322	0.171052	0.226805	4216
LGG	MAP3K4	Gamma_delta	0.185822	1.5484e-05	6.1593e-05	4216
LGG	MAP3K4	InfiltrationScore	0.0107842	0.803647	0.838973	4216
LGG	MAP3K4	MAIT	-0.0743909	0.0859045	0.123772	4216
LGG	MAP3K4	Macrophage	-0.0428654	0.322816	0.384608	4216
LGG	MAP3K4	Monocyte	0.13571	0.00167079	0.00303112	4216
LGG	MAP3K4	NK	0.102306	0.0180393	0.0354124	4216
LGG	MAP3K4	NKT	-0.0688996	0.111762	0.213392	4216
LGG	MAP3K4	Neutrophil	0.00536042	0.901647	0.928924	4216
LGG	MAP3K4	Tfh	0.0851409	0.0492484	0.087543	4216
LGG	MAP3K4	Th1	0.0771432	0.07489	0.110529	4216
LGG	MAP3K4	Th17	0.0690973	0.110735	0.190361	4216
LGG	MAP3K4	Th2	-0.0561833	0.194875	0.256952	4216
LGG	MAP3K4	Tr1	0.0614311	0.15631	0.250706	4216
LGG	MAP3K4	iTreg	0.0499667	0.249047	0.453165	4216
LGG	MAP3K4	nTreg	0.123305	0.00432275	0.0279899	4216
LIHC	MAP3K4	Bcell	0.198692	3.7822e-05	0.000102904	4216
LIHC	MAP3K4	CD4_T	0.26297	3.88668e-08	2.5133e-07	4216
LIHC	MAP3K4	CD4_naive	0.129671	0.00750628	0.01484	4216
LIHC	MAP3K4	CD8_T	0.119255	0.0140051	0.0322748	4216
LIHC	MAP3K4	CD8_naive	0.0307127	0.528241	0.67111	4216
LIHC	MAP3K4	Central_memory	0.138277	0.00433615	0.0100053	4216
LIHC	MAP3K4	Cytotoxic	-0.0255839	0.59935	0.728125	4216
LIHC	MAP3K4	DC	-0.032309	0.507015	0.625623	4216
LIHC	MAP3K4	Effector_memory	-0.0999675	0.0396346	0.0836935	4216
LIHC	MAP3K4	Exhausted	0.122169	0.0118152	0.0356305	4216
LIHC	MAP3K4	Gamma_delta	0.0448043	0.357408	0.518686	4216
LIHC	MAP3K4	InfiltrationScore	-0.0174486	0.720153	0.788454	4216
LIHC	MAP3K4	MAIT	-0.158246	0.00107741	0.00311858	4216
LIHC	MAP3K4	Macrophage	-0.158344	0.00106962	0.00264737	4216
LIHC	MAP3K4	Monocyte	-0.187665	0.000101308	0.000477981	4216
LIHC	MAP3K4	NK	-0.0244994	0.614922	0.697498	4216
LIHC	MAP3K4	NKT	-0.0533717	0.272847	0.370623	4216
LIHC	MAP3K4	Neutrophil	-0.108393	0.0256191	0.0542351	4216
LIHC	MAP3K4	Tfh	0.0775187	0.11096	0.185114	4216
LIHC	MAP3K4	Th1	0.0904159	0.0628725	0.153976	4216
LIHC	MAP3K4	Th17	-0.175912	0.000272652	0.000682669	4216
LIHC	MAP3K4	Th2	-0.0125904	0.796023	0.876188	4216
LIHC	MAP3K4	Tr1	0.031148	0.522408	0.636195	4216
LIHC	MAP3K4	iTreg	0.135647	0.00514444	0.0109497	4216
LIHC	MAP3K4	nTreg	0.101167	0.0373106	0.0666825	4216
LUAD	MAP3K4	Bcell	-0.0911114	0.028781	0.0604643	4216
LUAD	MAP3K4	CD4_T	0.17929	1.4997e-05	3.7068e-05	4216
LUAD	MAP3K4	CD4_naive	0.0143173	0.731684	0.870274	4216
LUAD	MAP3K4	CD8_T	-0.145317	0.000467655	0.00205308	4216
LUAD	MAP3K4	CD8_naive	-0.0408707	0.327493	0.437392	4216
LUAD	MAP3K4	Central_memory	-0.0392142	0.347496	0.47661	4216
LUAD	MAP3K4	Cytotoxic	0.115018	0.00571662	0.0158854	4216
LUAD	MAP3K4	DC	-0.132363	0.00145336	0.00514898	4216
LUAD	MAP3K4	Effector_memory	-0.233252	1.47713e-08	6.47209e-08	4216
LUAD	MAP3K4	Exhausted	-0.212337	2.69248e-07	1.10411e-06	4216
LUAD	MAP3K4	Gamma_delta	0.103324	0.0131005	0.0282954	4216
LUAD	MAP3K4	InfiltrationScore	0.108836	0.00894488	0.0161458	4216
LUAD	MAP3K4	MAIT	0.0698234	0.0940984	0.13125	4216
LUAD	MAP3K4	Macrophage	0.0183049	0.661097	0.728008	4216
LUAD	MAP3K4	Monocyte	-0.0161305	0.699262	0.800485	4216
LUAD	MAP3K4	NK	0.194582	2.5402e-06	9.07318e-06	4216
LUAD	MAP3K4	NKT	0.256656	4.06859e-10	1.59119e-09	4216
LUAD	MAP3K4	Neutrophil	0.117552	0.00472912	0.0166822	4216
LUAD	MAP3K4	Tfh	0.165255	6.75e-05	0.000179586	4216
LUAD	MAP3K4	Th1	-0.0624202	0.134578	0.204115	4216
LUAD	MAP3K4	Th17	-0.0887499	0.0332068	0.0649472	4216
LUAD	MAP3K4	Th2	0.105785	0.0110707	0.0227784	4216
LUAD	MAP3K4	Tr1	-0.017347	0.677809	0.768646	4216
LUAD	MAP3K4	iTreg	0.0638599	0.125801	0.191746	4216
LUAD	MAP3K4	nTreg	-0.217636	1.32555e-07	3.4498e-07	4216
LUSC	MAP3K4	Bcell	0.0374039	0.379562	0.517843	4216
LUSC	MAP3K4	CD4_T	0.108495	0.0106052	0.0158248	4216
LUSC	MAP3K4	CD4_naive	0.103725	0.0145872	0.172558	4216
LUSC	MAP3K4	CD8_T	-0.0640299	0.132266	0.266173	4216
LUSC	MAP3K4	CD8_naive	0.358788	2.83885e-18	6.39298e-17	4216
LUSC	MAP3K4	Central_memory	-0.0785347	0.0647233	0.150142	4216
LUSC	MAP3K4	Cytotoxic	-0.160215	0.00015249	0.000337951	4216
LUSC	MAP3K4	DC	-0.0301343	0.479047	0.595735	4216
LUSC	MAP3K4	Effector_memory	0.000869065	0.983717	0.987336	4216
LUSC	MAP3K4	Exhausted	-0.191752	5.48426e-06	5.0268e-05	4216
LUSC	MAP3K4	Gamma_delta	-0.264897	2.38336e-10	2.5727e-09	4216
LUSC	MAP3K4	InfiltrationScore	-0.130461	0.0020916	0.0033561	4216
LUSC	MAP3K4	MAIT	-0.211536	5.0423e-07	2.05182e-06	4216
LUSC	MAP3K4	Macrophage	-0.156604	0.000215141	0.000418664	4216
LUSC	MAP3K4	Monocyte	0.238575	1.30809e-08	5.70621e-07	4216
LUSC	MAP3K4	NK	-0.241535	8.52797e-09	2.85211e-08	4216
LUSC	MAP3K4	NKT	0.0425019	0.318004	0.379596	4216
LUSC	MAP3K4	Neutrophil	0.0134662	0.751809	0.837723	4216
LUSC	MAP3K4	Tfh	-0.145709	0.00058125	0.00102508	4216
LUSC	MAP3K4	Th1	-0.147687	0.000487693	0.00312142	4216
LUSC	MAP3K4	Th17	0.0746082	0.0793367	0.146871	4216
LUSC	MAP3K4	Th2	-0.00446513	0.916487	0.944333	4216
LUSC	MAP3K4	Tr1	0.083059	0.0507086	0.124103	4216
LUSC	MAP3K4	iTreg	0.0503764	0.236495	0.358368	4216
LUSC	MAP3K4	nTreg	-0.00508616	0.904923	0.926456	4216
MESO	MAP3K4	Bcell	0.0137438	0.899459	0.978447	4216
MESO	MAP3K4	CD4_T	0.107979	0.319491	0.647398	4216
MESO	MAP3K4	CD4_naive	0.147105	0.173935	0.454419	4216
MESO	MAP3K4	CD8_T	-0.00264338	0.980614	0.995086	4216
MESO	MAP3K4	CD8_naive	0.189303	0.0790748	0.214556	4216
MESO	MAP3K4	Central_memory	0.25795	0.015858	0.104781	4216
MESO	MAP3K4	Cytotoxic	-0.230542	0.0316918	0.115991	4216
MESO	MAP3K4	DC	-0.174659	0.10566	0.398092	4216
MESO	MAP3K4	Effector_memory	-0.131878	0.223372	0.483583	4216
MESO	MAP3K4	Exhausted	0.0418265	0.700491	0.847765	4216
MESO	MAP3K4	Gamma_delta	-0.162023	0.133792	0.436045	4216
MESO	MAP3K4	InfiltrationScore	-0.186791	0.0832114	0.230282	4216
MESO	MAP3K4	MAIT	0.00906846	0.933563	0.980031	4216
MESO	MAP3K4	Macrophage	-0.233291	0.0296583	0.132879	4216
MESO	MAP3K4	Monocyte	0.0456449	0.674625	0.922171	4216
MESO	MAP3K4	NK	-0.0565317	0.603006	0.795613	4216
MESO	MAP3K4	NKT	0.10769	0.320795	0.650172	4216
MESO	MAP3K4	Neutrophil	-0.187824	0.081489	0.353904	4216
MESO	MAP3K4	Tfh	-0.102111	0.346648	0.675216	4216
MESO	MAP3K4	Th1	-0.0213732	0.844223	0.93328	4216
MESO	MAP3K4	Th17	-0.136862	0.206209	0.387909	4216
MESO	MAP3K4	Th2	-0.0515052	0.63566	0.852012	4216
MESO	MAP3K4	Tr1	0.0451639	0.677864	0.901318	4216
MESO	MAP3K4	iTreg	0.234545	0.0287679	0.115128	4216
MESO	MAP3K4	nTreg	0.145021	0.180182	0.427763	4216
OV	MAP3K4	Bcell	0.0695022	0.223126	0.43356	4216
OV	MAP3K4	CD4_T	0.235668	2.8521e-05	0.000212934	4216
OV	MAP3K4	CD4_naive	0.0329533	0.563888	0.859505	4216
OV	MAP3K4	CD8_T	-0.141956	0.012493	0.0579558	4216
OV	MAP3K4	CD8_naive	0.150319	0.00812779	0.0196512	4216
OV	MAP3K4	Central_memory	-0.0471607	0.408742	0.558306	4216
OV	MAP3K4	Cytotoxic	-0.0771504	0.176151	0.292777	4216
OV	MAP3K4	DC	-0.0338087	0.553808	0.710844	4216
OV	MAP3K4	Effector_memory	-0.108529	0.0566925	0.123706	4216
OV	MAP3K4	Exhausted	-0.234499	3.1325e-05	0.00022718	4216
OV	MAP3K4	Gamma_delta	-0.149543	0.00846619	0.0429478	4216
OV	MAP3K4	InfiltrationScore	-0.00687455	0.904202	0.943154	4216
OV	MAP3K4	MAIT	-0.203591	0.000315668	0.00471691	4216
OV	MAP3K4	Macrophage	-0.0802085	0.159579	0.252389	4216
OV	MAP3K4	Monocyte	0.0793447	0.164136	0.344003	4216
OV	MAP3K4	NK	-0.125461	0.0274411	0.0888545	4216
OV	MAP3K4	NKT	-0.167711	0.0031053	0.0554996	4216
OV	MAP3K4	Neutrophil	0.145616	0.0103772	0.0266274	4216
OV	MAP3K4	Tfh	-0.0970022	0.0887088	0.164772	4216
OV	MAP3K4	Th1	-0.131995	0.0202861	0.0592741	4216
OV	MAP3K4	Th17	0.0545509	0.339202	0.520775	4216
OV	MAP3K4	Th2	-0.122731	0.0310188	0.107579	4216
OV	MAP3K4	Tr1	0.173962	0.00214762	0.0191321	4216
OV	MAP3K4	iTreg	0.0921012	0.106123	0.225195	4216
OV	MAP3K4	nTreg	0.0126612	0.82457	0.921279	4216
PAAD	MAP3K4	Bcell	0.163964	0.0265622	0.14621	4216
PAAD	MAP3K4	CD4_T	0.402805	1.57647e-08	1.23594e-07	4216
PAAD	MAP3K4	CD4_naive	-0.0291826	0.694945	0.909429	4216
PAAD	MAP3K4	CD8_T	0.237807	0.00118871	0.00634013	4216
PAAD	MAP3K4	CD8_naive	-0.145715	0.0490435	0.200447	4216
PAAD	MAP3K4	Central_memory	0.191058	0.00957588	0.025664	4216
PAAD	MAP3K4	Cytotoxic	0.292157	5.9939e-05	0.000424661	4216
PAAD	MAP3K4	DC	-0.0792999	0.285936	0.439632	4216
PAAD	MAP3K4	Effector_memory	-0.223728	0.00233079	0.0196437	4216
PAAD	MAP3K4	Exhausted	0.0431159	0.562229	0.770548	4216
PAAD	MAP3K4	Gamma_delta	0.383461	8.41171e-08	1.43092e-06	4216
PAAD	MAP3K4	InfiltrationScore	0.245397	0.000813197	0.00382195	4216
PAAD	MAP3K4	MAIT	0.135227	0.0679743	0.12966	4216
PAAD	MAP3K4	Macrophage	0.11628	0.116985	0.23968	4216
PAAD	MAP3K4	Monocyte	-0.218343	0.00298421	0.00976469	4216
PAAD	MAP3K4	NK	0.267064	0.000257553	0.00136674	4216
PAAD	MAP3K4	NKT	-0.128179	0.0837675	0.259368	4216
PAAD	MAP3K4	Neutrophil	-0.352203	1.01119e-06	7.55625e-06	4216
PAAD	MAP3K4	Tfh	0.36752	3.08945e-07	2.69324e-06	4216
PAAD	MAP3K4	Th1	0.0120512	0.871374	0.964647	4216
PAAD	MAP3K4	Th17	-0.467352	2.56417e-11	1.24993e-09	4216
PAAD	MAP3K4	Th2	-0.21158	0.00403756	0.0463424	4216
PAAD	MAP3K4	Tr1	0.381386	1.00032e-07	1.31814e-06	4216
PAAD	MAP3K4	iTreg	0.351832	1.03983e-06	6.7156e-06	4216
PAAD	MAP3K4	nTreg	-0.263933	0.000305982	0.00182951	4216
PCPG	MAP3K4	Bcell	0.116341	0.112817	0.242607	4216
PCPG	MAP3K4	CD4_T	0.150745	0.0394586	0.125325	4216
PCPG	MAP3K4	CD4_naive	0.0665245	0.365671	0.701299	4216
PCPG	MAP3K4	CD8_T	-0.0138993	0.850245	0.939365	4216
PCPG	MAP3K4	CD8_naive	-0.0605398	0.410466	0.556209	4216
PCPG	MAP3K4	Central_memory	0.228195	0.00168286	0.00613797	4216
PCPG	MAP3K4	Cytotoxic	0.0240034	0.744358	0.86374	4216
PCPG	MAP3K4	DC	-0.077321	0.292875	0.507533	4216
PCPG	MAP3K4	Effector_memory	0.0273809	0.709902	0.839081	4216
PCPG	MAP3K4	Exhausted	-0.0575895	0.433689	0.650218	4216
PCPG	MAP3K4	Gamma_delta	0.163026	0.0257915	0.149755	4216
PCPG	MAP3K4	InfiltrationScore	-0.157996	0.0307991	0.090919	4216
PCPG	MAP3K4	MAIT	-0.0654866	0.373215	0.510973	4216
PCPG	MAP3K4	Macrophage	-0.10621	0.147964	0.286893	4216
PCPG	MAP3K4	Monocyte	-0.0683874	0.35237	0.566541	4216
PCPG	MAP3K4	NK	-0.243129	0.000799711	0.0059598	4216
PCPG	MAP3K4	NKT	0.025122	0.732886	0.852365	4216
PCPG	MAP3K4	Neutrophil	0.0527104	0.473702	0.658375	4216
PCPG	MAP3K4	Tfh	-0.0845537	0.249912	0.493014	4216
PCPG	MAP3K4	Th1	-0.0568619	0.43953	0.607161	4216
PCPG	MAP3K4	Th17	-0.177591	0.0150325	0.0755837	4216
PCPG	MAP3K4	Th2	-0.155707	0.0333391	0.111099	4216
PCPG	MAP3K4	Tr1	0.135813	0.063831	0.241827	4216
PCPG	MAP3K4	iTreg	-0.0268935	0.71484	0.836421	4216
PCPG	MAP3K4	nTreg	0.0498136	0.498378	0.628937	4216
PRAD	MAP3K4	Bcell	-0.0820405	0.0544943	0.190332	4216
PRAD	MAP3K4	CD4_T	0.213222	4.48172e-07	1.3532e-06	4216
PRAD	MAP3K4	CD4_naive	0.0165817	0.698004	0.765249	4216
PRAD	MAP3K4	CD8_T	-0.00439015	0.918182	0.941562	4216
PRAD	MAP3K4	CD8_naive	-0.136745	0.00130548	0.0108638	4216
PRAD	MAP3K4	Central_memory	0.188101	8.95303e-06	1.9814e-05	4216
PRAD	MAP3K4	Cytotoxic	0.12612	0.00304767	0.00755041	4216
PRAD	MAP3K4	DC	-0.263705	3.34468e-10	3.71987e-09	4216
PRAD	MAP3K4	Effector_memory	-0.00529417	0.901412	0.932297	4216
PRAD	MAP3K4	Exhausted	0.145658	0.000611415	0.00237579	4216
PRAD	MAP3K4	Gamma_delta	-0.00704216	0.869118	0.905317	4216
PRAD	MAP3K4	InfiltrationScore	-0.0850584	0.0461661	0.0911512	4216
PRAD	MAP3K4	MAIT	-0.0119049	0.780576	0.850903	4216
PRAD	MAP3K4	Macrophage	-0.0225578	0.597576	0.70412	4216
PRAD	MAP3K4	Monocyte	-0.211613	5.49123e-07	3.02018e-06	4216
PRAD	MAP3K4	NK	0.0976417	0.0220117	0.0331065	4216
PRAD	MAP3K4	NKT	0.0605182	0.156381	0.202187	4216
PRAD	MAP3K4	Neutrophil	-0.161257	0.000145813	0.00034622	4216
PRAD	MAP3K4	Tfh	0.161773	0.00013874	0.000451905	4216
PRAD	MAP3K4	Th1	-0.0217368	0.610981	0.75443	4216
PRAD	MAP3K4	Th17	-0.0407136	0.340569	0.422729	4216
PRAD	MAP3K4	Th2	-0.140815	0.000928317	0.00310985	4216
PRAD	MAP3K4	Tr1	0.105821	0.0130266	0.0423959	4216
PRAD	MAP3K4	iTreg	0.139481	0.00103906	0.00216058	4216
PRAD	MAP3K4	nTreg	-0.0127459	0.765512	0.81663	4216
READ	MAP3K4	Bcell	0.00179892	0.985469	0.992529	4216
READ	MAP3K4	CD4_T	0.20364	0.0371972	0.0845017	4216
READ	MAP3K4	CD4_naive	-0.0614693	0.533336	0.856075	4216
READ	MAP3K4	CD8_T	-0.0265106	0.788354	0.916909	4216
READ	MAP3K4	CD8_naive	-0.0811722	0.410411	0.637185	4216
READ	MAP3K4	Central_memory	0.0693351	0.482171	0.71106	4216
READ	MAP3K4	Cytotoxic	0.274199	0.00464697	0.026831	4216
READ	MAP3K4	DC	0.0720589	0.465087	0.704744	4216
READ	MAP3K4	Effector_memory	-0.0699425	0.478332	0.754163	4216
READ	MAP3K4	Exhausted	0.152334	0.120819	0.351458	4216
READ	MAP3K4	Gamma_delta	0.143048	0.145461	0.34686	4216
READ	MAP3K4	InfiltrationScore	0.171174	0.0808239	0.181564	4216
READ	MAP3K4	MAIT	-0.0221765	0.82233	0.899485	4216
READ	MAP3K4	Macrophage	0.11848	0.22868	0.421136	4216
READ	MAP3K4	Monocyte	0.186939	0.0561987	0.166517	4216
READ	MAP3K4	NK	0.0441601	0.654652	0.782822	4216
READ	MAP3K4	NKT	0.024272	0.805858	0.902889	4216
READ	MAP3K4	Neutrophil	-0.152481	0.120458	0.245057	4216
READ	MAP3K4	Tfh	0.0437874	0.657383	0.785426	4216
READ	MAP3K4	Th1	0.218478	0.025152	0.149911	4216
READ	MAP3K4	Th17	-0.2204	0.0238675	0.111071	4216
READ	MAP3K4	Th2	0.0722933	0.463633	0.59575	4216
READ	MAP3K4	Tr1	0.266733	0.00595036	0.0531179	4216
READ	MAP3K4	iTreg	0.270551	0.00524805	0.0344927	4216
READ	MAP3K4	nTreg	-0.0251308	0.799131	0.870674	4216
SARC	MAP3K4	Bcell	0.115728	0.0599255	0.177772	4216
SARC	MAP3K4	CD4_T	-0.0758059	0.218709	0.323896	4216
SARC	MAP3K4	CD4_naive	0.155559	0.0112192	0.0274991	4216
SARC	MAP3K4	CD8_T	-0.148175	0.0157765	0.0656994	4216
SARC	MAP3K4	CD8_naive	0.0924807	0.133206	0.228072	4216
SARC	MAP3K4	Central_memory	0.0153533	0.803541	0.868241	4216
SARC	MAP3K4	Cytotoxic	-0.105747	0.0857762	0.141882	4216
SARC	MAP3K4	DC	-0.0375381	0.542921	0.634076	4216
SARC	MAP3K4	Effector_memory	0.0201474	0.744078	0.881028	4216
SARC	MAP3K4	Exhausted	-0.229227	0.000167117	0.000632243	4216
SARC	MAP3K4	Gamma_delta	-0.0271489	0.659978	0.81978	4216
SARC	MAP3K4	InfiltrationScore	-0.206337	0.000726239	0.00174807	4216
SARC	MAP3K4	MAIT	0.0345125	0.575935	0.742789	4216
SARC	MAP3K4	Macrophage	-0.137415	0.0252867	0.0408413	4216
SARC	MAP3K4	Monocyte	0.0446601	0.469104	0.593515	4216
SARC	MAP3K4	NK	-0.24596	5.1797e-05	0.000308951	4216
SARC	MAP3K4	NKT	-0.0959929	0.119028	0.243548	4216
SARC	MAP3K4	Neutrophil	0.168763	0.00588624	0.0202031	4216
SARC	MAP3K4	Tfh	-0.198268	0.00117625	0.0048751	4216
SARC	MAP3K4	Th1	-0.156666	0.0106472	0.034599	4216
SARC	MAP3K4	Th17	-0.0147667	0.810903	0.893398	4216
SARC	MAP3K4	Th2	0.0245151	0.691183	0.864241	4216
SARC	MAP3K4	Tr1	0.113415	0.065259	0.234776	4216
SARC	MAP3K4	iTreg	-0.162416	0.00807187	0.023794	4216
SARC	MAP3K4	nTreg	0.01758	0.775759	0.864397	4216
SKCM	MAP3K4	Bcell	0.0987116	0.0316598	0.104823	4216
SKCM	MAP3K4	CD4_T	0.289632	1.29836e-10	9.6914e-10	4216
SKCM	MAP3K4	CD4_naive	0.138955	0.00242934	0.012472	4216
SKCM	MAP3K4	CD8_T	0.00127873	0.977848	0.98461	4216
SKCM	MAP3K4	CD8_naive	0.00771505	0.866955	0.912439	4216
SKCM	MAP3K4	Central_memory	0.182151	6.6446e-05	0.00026185	4216
SKCM	MAP3K4	Cytotoxic	0.0499124	0.278154	0.395054	4216
SKCM	MAP3K4	DC	-0.176945	0.00010759	0.000638865	4216
SKCM	MAP3K4	Effector_memory	-0.131539	0.00412125	0.0147906	4216
SKCM	MAP3K4	Exhausted	-0.0933212	0.0422737	0.0966161	4216
SKCM	MAP3K4	Gamma_delta	-0.172816	0.000156181	0.000501087	4216
SKCM	MAP3K4	InfiltrationScore	0.0153081	0.739571	0.804381	4216
SKCM	MAP3K4	MAIT	0.189294	3.3554e-05	0.000196057	4216
SKCM	MAP3K4	Macrophage	-0.0299018	0.516057	0.656764	4216
SKCM	MAP3K4	Monocyte	-0.0149588	0.745307	0.827826	4216
SKCM	MAP3K4	NK	0.00858785	0.852068	0.895473	4216
SKCM	MAP3K4	NKT	-0.0177653	0.699655	0.807795	4216
SKCM	MAP3K4	Neutrophil	-0.164411	0.000325002	0.00109647	4216
SKCM	MAP3K4	Tfh	0.119331	0.00930982	0.0239743	4216
SKCM	MAP3K4	Th1	0.0200433	0.663371	0.789017	4216
SKCM	MAP3K4	Th17	0.0982498	0.0324698	0.0710341	4216
SKCM	MAP3K4	Th2	0.111538	0.0151182	0.056518	4216
SKCM	MAP3K4	Tr1	0.0520544	0.258022	0.491486	4216
SKCM	MAP3K4	iTreg	0.26705	3.49778e-09	1.75186e-08	4216
SKCM	MAP3K4	nTreg	-0.153292	0.000812815	0.00291395	4216
STAD	MAP3K4	Bcell	-0.0746391	0.113847	0.188334	4216
STAD	MAP3K4	CD4_T	0.18003	0.000123134	0.00024349	4216
STAD	MAP3K4	CD4_naive	0.130301	0.00563613	0.0298766	4216
STAD	MAP3K4	CD8_T	-0.242858	1.83079e-07	2.20022e-06	4216
STAD	MAP3K4	CD8_naive	0.20971	7.2498e-06	3.9352e-05	4216
STAD	MAP3K4	Central_memory	0.108057	0.0218725	0.0576082	4216
STAD	MAP3K4	Cytotoxic	-0.191164	4.4722e-05	0.000272714	4216
STAD	MAP3K4	DC	-0.170443	0.000281007	0.00086175	4216
STAD	MAP3K4	Effector_memory	0.104476	0.02668	0.0570333	4216
STAD	MAP3K4	Exhausted	-0.0851835	0.0710324	0.120281	4216
STAD	MAP3K4	Gamma_delta	-0.193792	3.491e-05	0.000217088	4216
STAD	MAP3K4	InfiltrationScore	-0.19853	2.2151e-05	0.000136479	4216
STAD	MAP3K4	MAIT	-0.106368	0.0240366	0.0541086	4216
STAD	MAP3K4	Macrophage	-0.164083	0.000474482	0.00206895	4216
STAD	MAP3K4	Monocyte	0.0231298	0.624588	0.71927	4216
STAD	MAP3K4	NK	-0.0850717	0.0714051	0.125302	4216
STAD	MAP3K4	NKT	-0.108751	0.0210337	0.0426988	4216
STAD	MAP3K4	Neutrophil	0.125369	0.00775403	0.015623	4216
STAD	MAP3K4	Tfh	-0.150314	0.00138405	0.00351267	4216
STAD	MAP3K4	Th1	-0.0586055	0.214673	0.297375	4216
STAD	MAP3K4	Th17	-0.0139031	0.768664	0.85119	4216
STAD	MAP3K4	Th2	0.0633936	0.179469	0.256512	4216
STAD	MAP3K4	Tr1	-0.0336296	0.476707	0.594563	4216
STAD	MAP3K4	iTreg	0.151916	0.00122736	0.00415038	4216
STAD	MAP3K4	nTreg	0.0230821	0.625303	0.693205	4216
TGCT	MAP3K4	Bcell	0.146572	0.0678744	0.0940496	4216
TGCT	MAP3K4	CD4_T	0.0133253	0.868864	0.918499	4216
TGCT	MAP3K4	CD4_naive	0.0352712	0.662017	0.882549	4216
TGCT	MAP3K4	CD8_T	-0.091945	0.25363	0.331602	4216
TGCT	MAP3K4	CD8_naive	-0.0172255	0.83099	0.87135	4216
TGCT	MAP3K4	Central_memory	0.212013	0.00788333	0.0129823	4216
TGCT	MAP3K4	Cytotoxic	0.104996	0.192074	0.243204	4216
TGCT	MAP3K4	DC	-0.143213	0.0744965	0.196464	4216
TGCT	MAP3K4	Effector_memory	0.371876	1.75354e-06	2.7234e-05	4216
TGCT	MAP3K4	Exhausted	-0.105742	0.18892	0.28564	4216
TGCT	MAP3K4	Gamma_delta	-0.0140154	0.862138	0.931653	4216
TGCT	MAP3K4	InfiltrationScore	-0.35242	6.42374e-06	5.4304e-05	4216
TGCT	MAP3K4	MAIT	-0.434518	1.44825e-08	1.64862e-07	4216
TGCT	MAP3K4	Macrophage	-0.256914	0.00120552	0.00519522	4216
TGCT	MAP3K4	Monocyte	-0.262451	0.000933428	0.00162889	4216
TGCT	MAP3K4	NK	-0.268905	0.000687918	0.0025382	4216
TGCT	MAP3K4	NKT	-0.288323	0.00026223	0.000561661	4216
TGCT	MAP3K4	Neutrophil	0.178755	0.0255681	0.0534994	4216
TGCT	MAP3K4	Tfh	-0.113145	0.159625	0.21533	4216
TGCT	MAP3K4	Th1	0.190634	0.0171363	0.0302464	4216
TGCT	MAP3K4	Th17	-0.260757	0.00101001	0.00208419	4216
TGCT	MAP3K4	Th2	-0.291384	0.000223792	0.000738663	4216
TGCT	MAP3K4	Tr1	0.244425	0.00210433	0.039974	4216
TGCT	MAP3K4	iTreg	0.306284	0.000100824	0.000576814	4216
TGCT	MAP3K4	nTreg	0.188777	0.0182689	0.0469013	4216
THCA	MAP3K4	Bcell	0.249587	1.42854e-09	1.0412e-08	4216
THCA	MAP3K4	CD4_T	0.2964	4.6015e-13	4.03518e-12	4216
THCA	MAP3K4	CD4_naive	0.146094	0.000456182	0.00159652	4216
THCA	MAP3K4	CD8_T	0.0121983	0.770964	0.828636	4216
THCA	MAP3K4	CD8_naive	0.0592251	0.157185	0.24615	4216
THCA	MAP3K4	Central_memory	0.143052	0.000600277	0.00112353	4216
THCA	MAP3K4	Cytotoxic	-0.317483	7.33248e-15	4.30934e-14	4216
THCA	MAP3K4	DC	-0.473179	2.9713e-33	3.09476e-32	4216
THCA	MAP3K4	Effector_memory	-0.236113	1.09276e-08	9.76219e-08	4216
THCA	MAP3K4	Exhausted	-0.20154	1.17656e-06	3.95125e-06	4216
THCA	MAP3K4	Gamma_delta	0.206755	6.09949e-07	2.5065e-06	4216
THCA	MAP3K4	InfiltrationScore	-0.37691	9.51039e-21	5.7014e-20	4216
THCA	MAP3K4	MAIT	0.128203	0.00212516	0.00400988	4216
THCA	MAP3K4	Macrophage	-0.424582	1.9437e-26	3.34166e-25	4216
THCA	MAP3K4	Monocyte	-0.444773	3.88741e-29	1.4029e-27	4216
THCA	MAP3K4	NK	-0.0838135	0.0451057	0.0712927	4216
THCA	MAP3K4	NKT	-0.113485	0.0065872	0.0160798	4216
THCA	MAP3K4	Neutrophil	0.206996	5.91482e-07	1.57873e-06	4216
THCA	MAP3K4	Tfh	0.00513894	0.902394	0.929093	4216
THCA	MAP3K4	Th1	-0.162673	9.3012e-05	0.000286165	4216
THCA	MAP3K4	Th17	0.121742	0.0035439	0.00673249	4216
THCA	MAP3K4	Th2	0.184625	8.8219e-06	4.2413e-05	4216
THCA	MAP3K4	Tr1	-0.161996	9.9569e-05	0.000232866	4216
THCA	MAP3K4	iTreg	-0.134946	0.00121563	0.00217236	4216
THCA	MAP3K4	nTreg	-0.317096	7.93475e-15	3.81298e-14	4216
THYM	MAP3K4	Bcell	-0.338669	0.000135848	0.000386141	4216
THYM	MAP3K4	CD4_T	0.17371	0.0556821	0.105723	4216
THYM	MAP3K4	CD4_naive	0.326639	0.000240709	0.00172221	4216
THYM	MAP3K4	CD8_T	-0.297952	0.000858706	0.00162174	4216
THYM	MAP3K4	CD8_naive	0.175981	0.0525106	0.0911452	4216
THYM	MAP3K4	Central_memory	0.216917	0.0163992	0.0385601	4216
THYM	MAP3K4	Cytotoxic	-0.393095	7.50489e-06	7.5287e-05	4216
THYM	MAP3K4	DC	-0.153703	0.0909729	0.136011	4216
THYM	MAP3K4	Effector_memory	0.0867635	0.341979	0.437525	4216
THYM	MAP3K4	Exhausted	-0.416888	1.78296e-06	9.60461e-06	4216
THYM	MAP3K4	Gamma_delta	-0.382772	1.3538e-05	8.4169e-05	4216
THYM	MAP3K4	InfiltrationScore	-0.221887	0.0140381	0.0358857	4216
THYM	MAP3K4	MAIT	-0.126634	0.164552	0.283345	4216
THYM	MAP3K4	Macrophage	-0.00811289	0.929329	0.947971	4216
THYM	MAP3K4	Monocyte	0.0953545	0.296131	0.370593	4216
THYM	MAP3K4	NK	-0.148631	0.102286	0.173573	4216
THYM	MAP3K4	NKT	0.171172	0.0594114	0.0960388	4216
THYM	MAP3K4	Neutrophil	0.288319	0.00127979	0.00428457	4216
THYM	MAP3K4	Tfh	-0.142104	0.118437	0.163024	4216
THYM	MAP3K4	Th1	-0.341579	0.000117879	0.00235794	4216
THYM	MAP3K4	Th17	0.188938	0.0371403	0.192358	4216
THYM	MAP3K4	Th2	0.0163965	0.857739	0.906186	4216
THYM	MAP3K4	Tr1	0.162514	0.0737022	0.163844	4216
THYM	MAP3K4	iTreg	0.14399	0.113581	0.177472	4216
THYM	MAP3K4	nTreg	-0.00582615	0.949217	0.962775	4216
UCEC	MAP3K4	Bcell	-0.00142986	0.983927	0.991256	4216
UCEC	MAP3K4	CD4_T	0.255272	0.000254876	0.000746301	4216
UCEC	MAP3K4	CD4_naive	0.0142003	0.841419	0.995559	4216
UCEC	MAP3K4	CD8_T	-0.10571	0.135297	0.274679	4216
UCEC	MAP3K4	CD8_naive	0.207822	0.00307235	0.0163843	4216
UCEC	MAP3K4	Central_memory	0.151724	0.0315468	0.0614081	4216
UCEC	MAP3K4	Cytotoxic	-0.0309381	0.662842	0.805389	4216
UCEC	MAP3K4	DC	-0.277161	6.7982e-05	0.000469102	4216
UCEC	MAP3K4	Effector_memory	-0.140162	0.0471939	0.117445	4216
UCEC	MAP3K4	Exhausted	-0.250143	0.000341799	0.00255452	4216
UCEC	MAP3K4	Gamma_delta	0.0680291	0.337269	0.52744	4216
UCEC	MAP3K4	InfiltrationScore	-0.188739	0.00728976	0.0216091	4216
UCEC	MAP3K4	MAIT	0.0551957	0.436424	0.652842	4216
UCEC	MAP3K4	Macrophage	-0.287426	3.5158e-05	0.00022637	4216
UCEC	MAP3K4	Monocyte	-0.132357	0.0610648	0.134329	4216
UCEC	MAP3K4	NK	0.0162499	0.818899	0.877508	4216
UCEC	MAP3K4	NKT	-0.137675	0.051296	0.250929	4216
UCEC	MAP3K4	Neutrophil	0.00856791	0.903916	0.952899	4216
UCEC	MAP3K4	Tfh	0.0546904	0.440641	0.581306	4216
UCEC	MAP3K4	Th1	-0.160772	0.0226095	0.0843847	4216
UCEC	MAP3K4	Th17	0.0624723	0.378299	0.550668	4216
UCEC	MAP3K4	Th2	-0.00702175	0.921193	0.94868	4216
UCEC	MAP3K4	Tr1	-0.0338906	0.632919	0.795859	4216
UCEC	MAP3K4	iTreg	0.0164956	0.81621	0.888203	4216
UCEC	MAP3K4	nTreg	-0.149476	0.0341851	0.0898999	4216
UCS	MAP3K4	Bcell	0.067662	0.617009	0.863919	4216
UCS	MAP3K4	CD4_T	0.0404175	0.765316	0.883793	4216
UCS	MAP3K4	CD4_naive	0.12996	0.335281	0.697263	4216
UCS	MAP3K4	CD8_T	-0.0423973	0.754173	0.920132	4216
UCS	MAP3K4	CD8_naive	-0.00188016	0.988925	0.996163	4216
UCS	MAP3K4	Central_memory	0.0349853	0.796129	0.940129	4216
UCS	MAP3K4	Cytotoxic	-0.0378998	0.779555	0.95831	4216
UCS	MAP3K4	DC	-0.129971	0.335238	0.670004	4216
UCS	MAP3K4	Effector_memory	0.0413334	0.760155	0.942382	4216
UCS	MAP3K4	Exhausted	-0.161132	0.231145	0.596087	4216
UCS	MAP3K4	Gamma_delta	-0.0441156	0.744542	0.916159	4216
UCS	MAP3K4	InfiltrationScore	-0.324939	0.013655	0.170759	4216
UCS	MAP3K4	MAIT	-0.0156886	0.907788	0.993872	4216
UCS	MAP3K4	Macrophage	-0.324782	0.0137031	0.193591	4216
UCS	MAP3K4	Monocyte	-0.244635	0.0666519	0.893438	4216
UCS	MAP3K4	NK	-0.0675181	0.61776	0.933504	4216
UCS	MAP3K4	NKT	-0.0575418	0.670721	0.883591	4216
UCS	MAP3K4	Neutrophil	-0.0066792	0.960672	0.9963	4216
UCS	MAP3K4	Tfh	-0.081544	0.546502	0.89154	4216
UCS	MAP3K4	Th1	-0.252578	0.0580219	0.559636	4216
UCS	MAP3K4	Th17	0.265197	0.0461856	0.322851	4216
UCS	MAP3K4	Th2	0.0168865	0.900781	0.986784	4216
UCS	MAP3K4	Tr1	-0.139033	0.302335	0.958242	4216
UCS	MAP3K4	iTreg	-0.0545508	0.68693	0.893766	4216
UCS	MAP3K4	nTreg	-0.0204601	0.879925	0.969596	4216
UVM	MAP3K4	Bcell	-0.0495906	0.662228	0.76573	4216
UVM	MAP3K4	CD4_T	0.196586	0.0805078	0.154002	4216
UVM	MAP3K4	CD4_naive	0.231651	0.0386816	0.136338	4216
UVM	MAP3K4	CD8_T	-0.0396409	0.727002	0.852996	4216
UVM	MAP3K4	CD8_naive	0.110316	0.329984	0.65442	4216
UVM	MAP3K4	Central_memory	0.0606211	0.593224	0.893634	4216
UVM	MAP3K4	Cytotoxic	-0.127953	0.258016	0.494285	4216
UVM	MAP3K4	DC	-0.230752	0.0394648	0.12019	4216
UVM	MAP3K4	Effector_memory	0.0734048	0.517571	0.62305	4216
UVM	MAP3K4	Exhausted	-0.0630499	0.578475	0.743343	4216
UVM	MAP3K4	Gamma_delta	-0.270863	0.0150921	0.0533195	4216
UVM	MAP3K4	InfiltrationScore	-0.195891	0.0816067	0.18857	4216
UVM	MAP3K4	MAIT	-0.0114288	0.919855	0.953862	4216
UVM	MAP3K4	Macrophage	-0.201863	0.0725531	0.207983	4216
UVM	MAP3K4	Monocyte	-0.0943801	0.404993	0.751594	4216
UVM	MAP3K4	NK	-0.168774	0.134509	0.316156	4216
UVM	MAP3K4	NKT	-0.0800235	0.480425	0.642729	4216
UVM	MAP3K4	Neutrophil	0.0156367	0.890504	0.927589	4216
UVM	MAP3K4	Tfh	-0.0172723	0.879133	0.940009	4216
UVM	MAP3K4	Th1	0.149335	0.186135	0.300148	4216
UVM	MAP3K4	Th17	0.192205	0.0876287	0.205842	4216
UVM	MAP3K4	Th2	-0.0404611	0.721582	0.889433	4216
UVM	MAP3K4	Tr1	-0.373643	0.000640402	0.0546111	4216
UVM	MAP3K4	iTreg	0.0840641	0.458468	0.584029	4216
UVM	MAP3K4	nTreg	0.0710125	0.531348	0.7074	4216
